# Supplementary material for: Light-induced aryldifluoromethyl-sulfonylation/thioetherification of alkenes using arenethiolates as a photoreductant and sulfur source
Source: Royal Society of Chemistry journal article supplement (doi:10.1039/d3gc03471b), 2023-01-01
Supplement: d3gc03471b1.pdf [file d3gc03471b1.pdf]

## **Supplementary Information**

### **Light-Induced Aryldifluoromethyl-sulfonylation/thioetherification of Alkenes Using Arenethiolate as Photoreductant and Sulfur Source**

Jiayu Li, Zipeng Guo, Xiaofeng Zhang, Xiaoli Meng, Zhenyang Dai, Meiyun Gao, Shuo Guo,\*  
and Pingping Tang

## Table of Contents

|                                                                        |    |
|------------------------------------------------------------------------|----|
| 1 General Information.....                                             | 4  |
| 2 Reaction Optimization Tables.....                                    | 5  |
| 2.1 Optimization of Bases (Table S1).....                              | 5  |
| 2.2 Optimization of Solvents (Table S2) .....                          | 6  |
| 2.3 Optimization of Wavelength of Light (Table S3).....                | 7  |
| 2.4 Optimization of the Amount of Arylthiols and Base (Table S4) ..... | 7  |
| 2.5 Optimization of Time and Amount of Solvent (Table S5) .....        | 8  |
| 2.6 Optimization of the Oxidation Step (Table S6) .....                | 8  |
| 2.7 Unsuccessful Substrates.....                                       | 9  |
| 3 Preparation of Substrates .....                                      | 9  |
| 3.1 Preparation of Alkenes.....                                        | 9  |
| 3.2 The Scope of Trifluoromethylarenes .....                           | 11 |
| 3.3 The Scope of Arylthiols .....                                      | 15 |
| 4 Experimental Procedures and Spectral Data.....                       | 16 |
| 4.1 General Procedure.....                                             | 16 |
| 4.2 Experimental Details and Characterization Data.....                | 17 |
| 5 Synthetic Applications .....                                         | 52 |
| 5.1 Gram-scale Reaction.....                                           | 52 |
| 5.2 Product Derivatizations.....                                       | 53 |
| 6 Mechanistic Studies .....                                            | 56 |
| 6.1 UV-Vis Absorption Spectroscopic Measurements .....                 | 56 |
| 6.2 <sup>19</sup> F NMR Titration Experiments .....                    | 58 |
| 6.3 Stern-Volmer Quenching Experiment .....                            | 59 |
| 6.4 Light On/Off Experiment.....                                       | 62 |
| 6.5 DFT Calculations.....                                              | 63 |
| 6.6 Radical Clock Experiment .....                                     | 68 |
| 6.7 Detection of the Alkyl Radical Intermediate .....                  | 70 |
| 7 NMR Spectra for New Compounds.....                                   | 74 |

|                                                 |     |
|-------------------------------------------------|-----|
| 8 X-Ray Crystallography Data of <b>5x</b> ..... | 167 |
| 9 References.....                               | 169 |

## 1 General Information

### Materials

All reactions were carried out in oven dried glassware under a nitrogen atmosphere. (purity  $\geq 99.999\%$ ) unless otherwise mentioned. All solvents were purified and dried according to standard methods prior to use. Commercial reagents were purchased from Adamas-beta, TCI, Aladdin, Macklin, J&K Chemical, Innochem and Aldrich. Organic solutions were concentrated under reduced pressure on Yarong rotary evaporator of RE-2000B. Reactions were monitored by thin-layer chromatography (TLC) carried out on  $0.2 \pm 0.03$  mm using UV light as a visualizing agent. The LED lamps were purchased from Kessil (370 nm, 390 nm, 427nm, 440 nm and 525 nm). The LED lamps of 365 nm (30 W) were purchased from Taobao (<https://m.tb.cn/h.5avX9aS?tk=WwODdsSy18W> ).

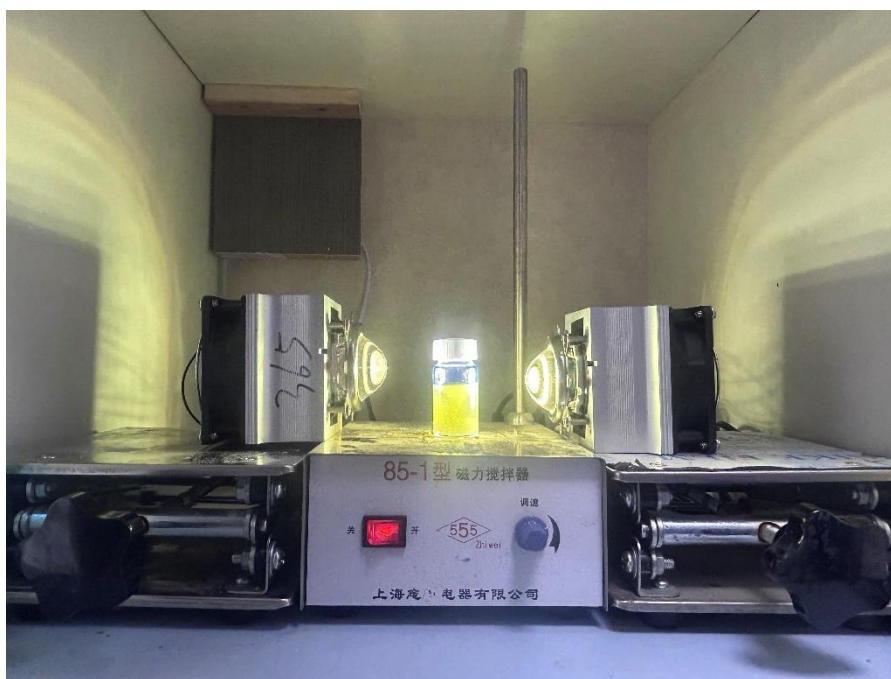

**Figure S1.** The photo reaction setup and 365 nm LED (30 W) lamps.

### Instruments

$^1\text{H}$  NMR,  $^{19}\text{F}$  NMR and  $^{13}\text{C}$  NMR spectra were recorded on Bruker AVIIIHD NEO 600 MHz. Chemical shifts ( $\delta$ ) were reported in parts per million relative to chloroform (7.26 ppm for  $^1\text{H}$  NMR; 77.0 ppm for  $^{13}\text{C}$  NMR) or acetone (2.05 ppm for  $^1\text{H}$  NMR; 205.9



ppm and 30.6 ppm for  $^{13}\text{C}$  NMR).  $^{19}\text{F}$  NMR chemical shifts were corrected by using (trifluoromethoxy)benzene as an internal standard (-58.4 ppm for  $^{19}\text{F}$  NMR). Coupling constants were reported in Hertz. The following abbreviations are used to explain the multiplicities: singlet (s), doublet (d), triplet (t), quartet (q), multiplet (m), broad (b). The HRMS analysis was obtained on the Waters G2-XS QToF mass spectrometer. X-ray single crystal diffraction data were collected on a Bruker SMART APEX II. GC-MS measurements were conducted on an Agilent 8860/5977B. UV-Vis spectrum was measured by UV-2600i. Emission intensities were recorded on the HITACHI F-7000 spectrometer. Chromatographic purification of products was accomplished using forced-flow chromatography on silica gel (200-300 mesh).

## 2 Reaction Optimization Tables

### 2.1 Optimization of Bases (Table S1)

| 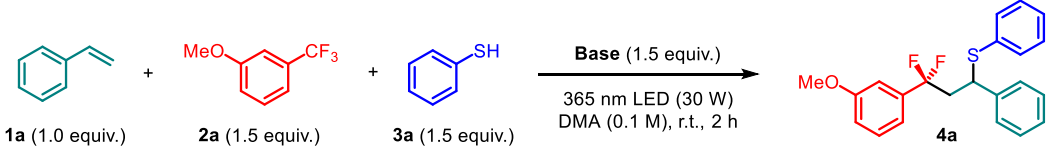 |                          |                                     |
|--------------------------------------------------------------------------------------|--------------------------|-------------------------------------|
| Entry <sup>a</sup>                                                                   | Base                     | Yield of <b>4a</b> (%) <sup>b</sup> |
| 1                                                                                    | $\text{Cs}_2\text{CO}_3$ | 65                                  |
| 2                                                                                    | $\text{K}_2\text{CO}_3$  | 33                                  |
| 3                                                                                    | $\text{Na}_2\text{CO}_3$ | N.D.                                |
| 4                                                                                    | KOH                      | 63                                  |
| 5                                                                                    | NaOH                     | 89                                  |
| 6                                                                                    | <i>t</i> BuOLi           | 95                                  |
| 7                                                                                    | <b><i>t</i>BuONa</b>     | <b>98</b>                           |
| 8                                                                                    | <i>t</i> BuOK            | 84                                  |
| 9                                                                                    | KOMe                     | 62                                  |
| 10                                                                                   | LiOMe                    | 94                                  |
| 11                                                                                   | EtONa                    | 92                                  |
| 12                                                                                   | EtOK                     | 91                                  |
| 13                                                                                   | HCOONa                   | N.D.                                |

|    |                                |      |
|----|--------------------------------|------|
| 14 | HCOOCs                         | N.D. |
| 15 | CH <sub>3</sub> COOCs          | 34   |
| 16 | CH <sub>3</sub> COOK           | N.D. |
| 17 | CsF                            | 12   |
| 18 | KF                             | 4    |
| 19 | K <sub>3</sub> PO <sub>4</sub> | 10   |
| 20 | DBU (pK <sub>a</sub> =12.0)    | 71   |
| 21 | TMG (pK <sub>a</sub> =12.7)    | 59   |
| 22 | -                              | N.D. |

<sup>a</sup>Reaction conditions: **1a** (0.10 mmol, 1.0 equiv.), **2a** (0.15 mmol, 1.5 equiv.), **3a** (0.15 mmol, 1.5 equiv.) and base (0.15 mmol, 1.5 equiv.) in DMA (1.0 mL, 0.1 M), irradiation with 30 W 365 nm LED at room temperature under a nitrogen atmosphere for 2 h. <sup>b</sup>Yields were determined by <sup>19</sup>F NMR using (trifluoromethoxy)benzene as an internal standard.

## 2.2 Optimization of Solvents (Table S2)

$\text{1a (1.0 equiv.)} + \text{2a (1.5 equiv.)} + \text{3a (1.5 equiv.)} \xrightarrow[\text{Solvent (0.1 M), r.t., 2 h}]{t\text{BuONa (1.5 equiv.)}, 365 \text{ nm LED (30 W)}} \text{4a}$

| Entry <sup>a</sup> | Solvent     | Yield of <b>4a</b> (%) <sup>b</sup> |
|--------------------|-------------|-------------------------------------|
| 1                  | DMF         | 72                                  |
| <b>2</b>           | <b>DMA</b>  | <b>98</b>                           |
| 3                  | DMSO        | 79                                  |
| 4                  | NMP         | 52                                  |
| 5                  | MeCN        | 18                                  |
| 6                  | DME         | 14                                  |
| 7                  | THF         | N.D.                                |
| 8                  | DCE         | N.D.                                |
| 9                  | MeOH        | N.D.                                |
| 10                 | toluene     | N.D.                                |
| 11                 | acetone     | N.D.                                |
| 12                 | 1,4-dioxane | N.D.                                |

<sup>a</sup>Reaction conditions: **1a** (0.10 mmol, 1.0 equiv.), **2a** (0.15 mmol, 1.5 equiv.), **3a** (0.15 mmol, 1.5 equiv.) and *t*BuONa (0.15 mmol, 1.5 equiv.) in DMA (1.0 mL, 0.1 M), irradiation with 30 W 365 nm LED at room temperature under a nitrogen atmosphere for 2 h. <sup>b</sup>Yields were determined by <sup>19</sup>F NMR using (trifluoromethoxy)benzene as an internal standard.

## 2.3 Optimization of Wavelength of Light (Table S3)

| Entry <sup>a</sup> | Light source | Yield of <b>4a</b> (%) <sup>b</sup> |
|--------------------|--------------|-------------------------------------|
| 1                  | 365nm        | 98                                  |
| 2                  | 370nm        | 84                                  |
| 3                  | 390nm        | 83                                  |
| 4                  | 427nm        | 87                                  |
| 5                  | 440nm        | 52                                  |
| 6                  | 525nm        | N.D.                                |
| 7                  | CFL          | N.D.                                |
| 8                  | -            | N.D.                                |

<sup>a</sup>Reaction conditions: **1a** (0.10 mmol, 1.0 equiv.), **2a** (0.15 mmol, 1.5 equiv.), **3a** (0.15 mmol, 1.5 equiv.) and *t*BuONa (0.15 mmol, 1.5 equiv.) in DMA (1.0 mL, 0.1 M), irradiation with light source at room temperature under a nitrogen atmosphere for 2 h. <sup>b</sup>Yields were determined by <sup>19</sup>F NMR using (trifluoromethoxy)benzene as an internal standard.

## 2.4 Optimization of the Amount of Arylthiols and Base (Table S4)

| Entry <sup>a</sup> | Amount of <b>3a</b><br>(x equiv.) | Amount of <b>base</b><br>(y equiv.) | Yield of <b>4a</b> (%) <sup>b</sup> |
|--------------------|-----------------------------------|-------------------------------------|-------------------------------------|
| 1                  | 1.5                               | 0.50                                | N.D.                                |
| 2                  | 1.5                               | 1.00                                | 29                                  |
| 3                  | 1.5                               | 1.25                                | 73                                  |
| 4                  | 1.5                               | 1.50                                | 98                                  |
| 5                  | 1.5                               | 1.75                                | 68                                  |
| 6                  | 1.5                               | 2.00                                | 20                                  |
| 7                  | 1.5                               | 3.00                                | 1                                   |
| 8                  | 1.0                               | 1.50                                | N.D.                                |
| 9                  | 2.0                               | 1.50                                | 28                                  |
| 10                 | 1.0                               | 1.00                                | 67                                  |
| 11                 | 2.0                               | 2.00                                | 92                                  |

<sup>a</sup>Reaction conditions: **1a** (0.10 mmol, 1.0 equiv.), **2a** (0.15 mmol, 1.5 equiv.), **3a** (x equiv.) and *t*BuONa (y equiv.) in DMA (1.0 mL, 0.1 M), irradiation with 30 W 365 nm LED at room temperature under a nitrogen atmosphere for 2 h. <sup>b</sup>Yields were determined by <sup>19</sup>F NMR using (trifluoromethoxy)benzene as an internal standard.

## 2.5 Optimization of Time and Amount of Solvent (Table S5)

| Entry <sup>a</sup> | Time (h)   | Concentration | Yield of <b>4a</b> (%) <sup>b</sup> |
|--------------------|------------|---------------|-------------------------------------|
| 1                  | 0.5        | 0.1 M         | 53                                  |
| 2                  | 1.0        | 0.1 M         | 78                                  |
| <b>3</b>           | <b>2.0</b> | <b>0.1 M</b>  | <b>98</b>                           |
| 4                  | 3.0        | 0.1 M         | 91                                  |
| 5                  | 2.0        | 0.025 M       | 64                                  |
| 6                  | 2.0        | 0.05 M        | 82                                  |
| 7                  | 2.0        | 0.2 M         | 87                                  |

<sup>a</sup>Reaction conditions: **1a** (0.10 mmol, 1.0 equiv.), **2a** (0.15 mmol, 1.5 equiv.), **3a** (0.15 mmol, 1.5 equiv.) and *t*BuONa (0.15 mmol, 1.5 equiv.) in DMA (x M), irradiation with 30 W 365 nm LED at room temperature under a nitrogen atmosphere. <sup>b</sup>Yields were determined by <sup>19</sup>F NMR using (trifluoromethoxy)benzene as an internal standard.

## 2.6 Optimization of the Oxidation Step (Table S6)

| <br><b>1a</b> (1.0 equiv.) <b>2a</b> (1.5 equiv.) <b>3a</b> (1.5 equiv.) <b>5n</b> |                                      |                                     |
|------------------------------------------------------------------------------------|--------------------------------------|-------------------------------------|
| Entry <sup>a</sup>                                                                 | Conditions                           | Yield of <b>5n</b> (%) <sup>b</sup> |
| <b>1</b>                                                                           | <b>dichloromethane</b>               | <b>80</b>                           |
| <b>2</b>                                                                           | <b>H<sub>2</sub>O</b>                | <b>62</b>                           |
| <b>3</b>                                                                           | <b>H<sub>2</sub>O/methanol (3:1)</b> | <b>81</b>                           |
| 4                                                                                  | methanol                             | 81                                  |
| 5                                                                                  | toluene                              | 78                                  |
| 6                                                                                  | acetone                              | 61                                  |
| 7                                                                                  | ethyl acetate                        | 55                                  |
| 8                                                                                  | <i>i</i> propanol                    | 49                                  |
| 9                                                                                  | <i>m</i> CPBA (1.0 equiv.)           | 37 <sup>c</sup>                     |

<sup>a</sup>Reaction conditions: **1a** (0.10 mmol, 1.0 equiv.), **2a** (0.15 mmol, 1.5 equiv.), **3a** (0.15 mmol, 1.5 equiv.) and *t*BuONa (0.15 mmol, 1.5 equiv.) in DMA (1.0 mL), irradiation with 30 W 365 nm LED at room temperature under a nitrogen atmosphere. After irradiation, remove DMA, then add solvent (2.0 mL, 0.05 M), *m*-CPBA (0.3 mmol, 3.0 equiv.), r.t. and 4 h. <sup>b</sup>Yields were determined by <sup>19</sup>F NMR using (trifluoromethoxy)benzene as an internal standard. <sup>c</sup>DCM (2.0 mL, 0.05M) was used as solvent.

## 2.7 Unsuccessful Substrates

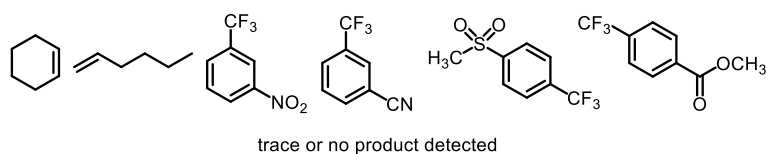

**Figure S2.** Unsuccessful substrates.

## 3 Preparation of Substrates

### 3.1 Preparation of Alkenes

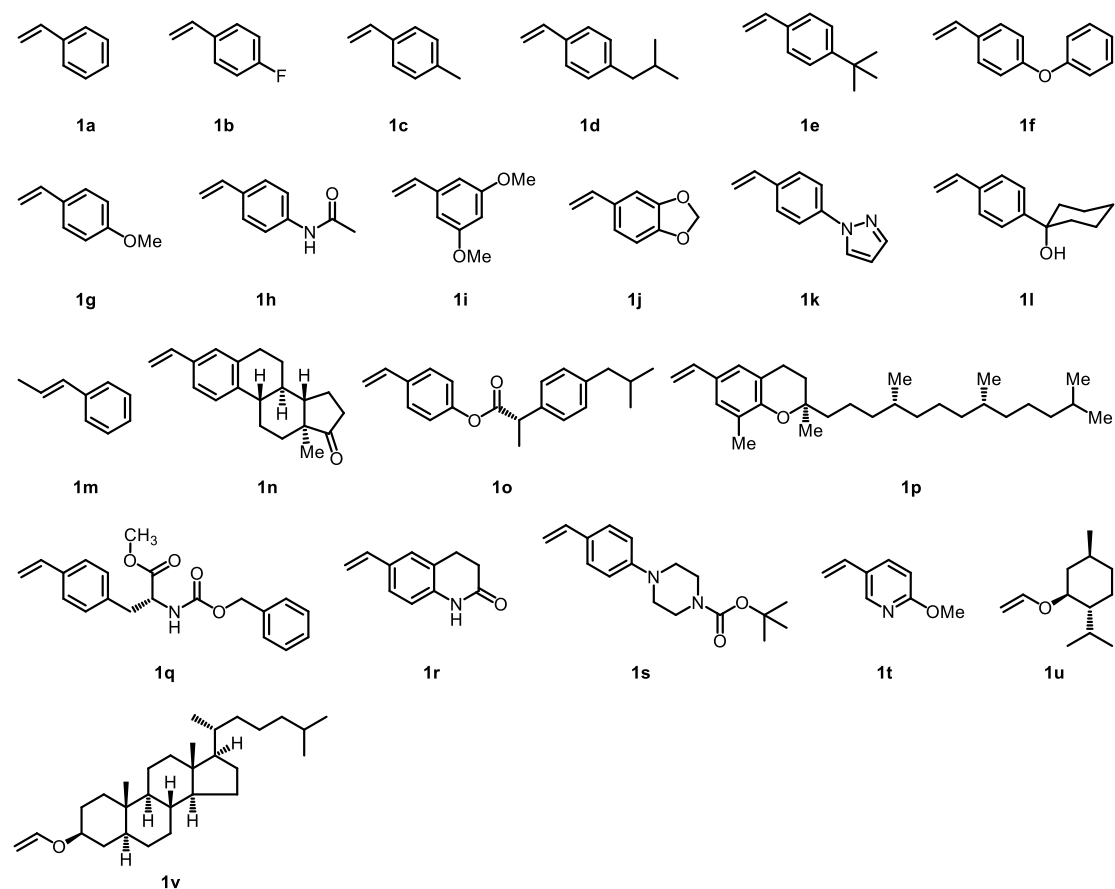

**Figure S3.** Scope of alkenes.

**Note:** Substrates **1a-1c**, **1e** and **1m** are commercially available. Substrates **1d**<sup>[1]</sup>, **1f**<sup>[2]</sup>, **1g**<sup>[3]</sup>, **1h**<sup>[4]</sup>, **1i**<sup>[5]</sup>, **1j**<sup>[6]</sup>, **1k**<sup>[7]</sup>, **1l**<sup>[8]</sup>, **1n**<sup>[9]</sup>, **1o**<sup>[10]</sup>, **1p**<sup>[11]</sup>, **1q**<sup>[8]</sup>, **1s**<sup>[12]</sup>, **1t**<sup>[13]</sup>, **1u**<sup>[14]</sup> and **1v**<sup>[15]</sup> were prepared according to the literatures. Other substrates are prepared from commercially available compounds, which are described in the following sections.

### Synthesis of Compound **1r**<sup>[16]</sup>

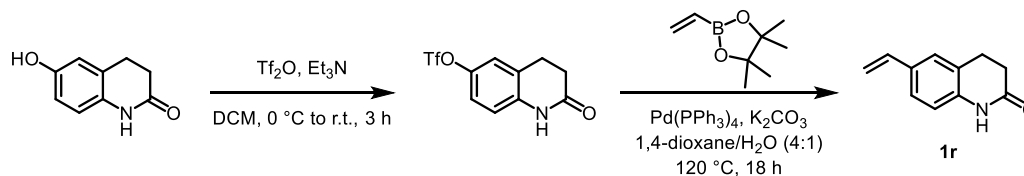

An oven-dried flask was charged with 6-hydroxy-2(1*H*)-3,4-dihydroquinolinone (326 mg, 2.0 mmol, 1.0 equiv.), DCM (10 mL), and Et<sub>3</sub>N (0.56 mL, 2.4 mmol, 1.2 equiv.) cooled at 0 °C, then a solution of triflic anhydride (0.4 mL, 2.4 mmol, 1.2 equiv.) in CH<sub>2</sub>Cl<sub>2</sub> (1 mL) was added dropwise. The reaction mixture was stirred at room temperature for 3 hours. The reaction was quenched by aqueous saturated NH<sub>4</sub>Cl (10 mL) and extracted by DCM (3 x 10 mL). The combined organic phases were dried over anhydrous Na<sub>2</sub>SO<sub>4</sub>, filtered, concentrated *in vacuo* to give a residue. Purification by column chromatography on silica gel using petroleum ether and ethyl acetate (1:1 (v/v)) as eluent afforded 2-oxo-1,2,3,4-tetrahydroquinolin-6-yl trifluoromethanesulfonate as a brown solid (396 mg, 82% yield).

2-Oxo-1,2,3,4-tetrahydroquinolin-6-yl trifluoromethanesulfonate (295 mg, 1.0 mmol, 1.0 equiv.), Pd(PPh<sub>3</sub>)<sub>4</sub> (139 mg, 0.12 mmol, 12 mol%) and K<sub>2</sub>CO<sub>3</sub> (414 mg, 3.0 mmol, 3.0 equiv.) were suspended under a nitrogen atmosphere. Add the 1,4-dioxane (8 mL) and H<sub>2</sub>O (2 mL) to the mixture after continuous degassing for 5 minutes. Then, pinacol vinylboronate (0.22 mL, 1.3 mmol, 1.3 equiv.) was added dropwise. The reaction mixture was stirred at 120 °C in an oil bath for 18 hours. The reaction mixture was cooled to room temperature, filtered and the solvent was removed under reduced pressure. Purification by column chromatography on silica gel using petroleum ether and ethyl acetate (2:1 (v/v)) as eluent afforded 6-vinyl-3,4-dihydroquinolin-2(1*H*)-one **1r** as a yellow solid (150 mg, 87% yield).

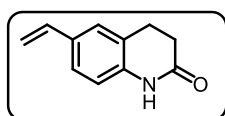

**NMR Spectroscopy:**  $^1\text{H}$  NMR (600 MHz, acetone- $d_6$ )  $\delta$  7.34 (s, 1H), 7.30 (d,  $J$  = 8.0 Hz, 1H), 6.94 (d,  $J$  = 8.1 Hz, 1H), 6.71 (dd,  $J$  = 17.5, 11.0 Hz, 1H), 5.73 (d,  $J$  = 17.6 Hz, 1H), 5.15 (d,  $J$  = 10.9 Hz, 1H), 2.98 (t,  $J$  = 7.3 Hz, 1H), 2.54 (t,  $J$  = 7.4 Hz, 1H).  $^{13}\text{C}$  NMR (151 MHz, acetone- $d_6$ )  $\delta$  170.8, 138.5, 137.0, 132.5, 126.1, 125.8, 124.5, 115.7, 111.9, 30.9, 25.7.

### 3.2 The Scope of Trifluoromethylarenes

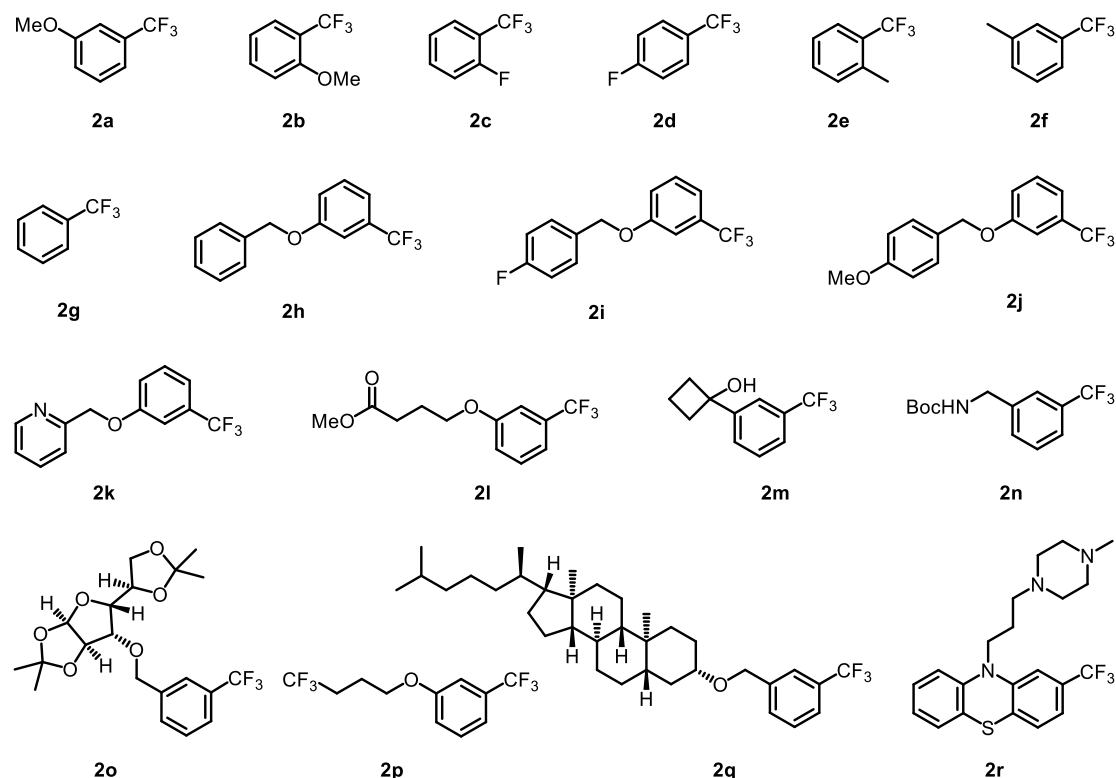

**Figure S4.** Scope of trifluoromethylarenes.

**Note:** Substrates **2a-2g** and **2r** are commercially available. Substrates **2h**<sup>[17]</sup>, **2j**<sup>[18]</sup>, **2k**<sup>[19]</sup>, **2m**<sup>[20]</sup>, and **2n**<sup>[21]</sup> were prepared according to the literatures. Other substrates are prepared from commercially available compounds, which are described as follows.

#### Synthesis of compound **2i**<sup>[22]</sup>

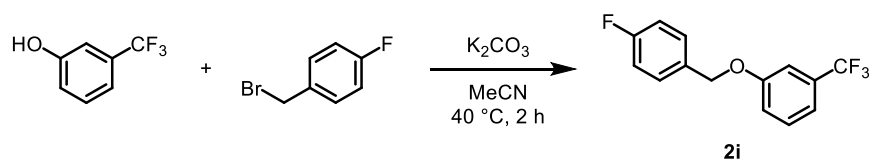

To a solution of 3-(trifluoromethyl)phenol (32.4 mg, 0.20 mmol, 1.0 equiv.) in acetonitrile (1 mL), 1-(bromomethyl)-4-fluorobenzene (27.5  $\mu$ L, 0.22 mmol, 1.1 equiv.) and  $K_2CO_3$  (41.5 mg, 0.30 mmol, 1.5 equiv.) were added under a nitrogen atmosphere. The mixture was stirred at 40 °C for 2 hours. After completion (monitored by TLC), the mixture was poured into water (2 mL), extracted with  $Et_2O$  (3 x 5 mL), combined organic layers were dried over anhydrous  $Na_2SO_4$ , filtered, concentrated *in vacuo* to give a residue. Purification by column chromatography on silica gel using petroleum ether and ethyl acetate (100:1 (v/v)) as eluent afforded **2i** as a colorless oil (0.7 g, 86% yield).

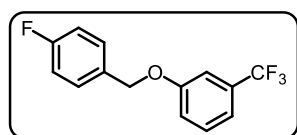

**NMR Spectroscopy:**  $^1H$  NMR (600 MHz,  $CDCl_3$ )  $\delta$  7.49 – 7.40 (m, 3H), 7.32 – 7.27 (m, 2H), 7.18 (d,  $J$  = 7.1 Hz, 1H), 7.16 – 7.10 (m, 2H), 5.07 (s, 2H).  $^{19}F$  NMR (565 MHz,  $CDCl_3$ )  $\delta$  -62.73 (s, 3F), -113.70 – -113.81 (m, 1F).  $^{13}C$  NMR (151 MHz,  $CDCl_3$ )  $\delta$  162.8 (d,  $J$  = 246.9 Hz), 158.9, 132.3, 132.1 (q,  $J$  = 32.6 Hz), 130.2, 129.6, 129.5, 126.0 (q,  $J$  = 272.5 Hz), 118.4, 117.9 (q,  $J$  = 3.5 Hz), 115.7 (d,  $J$  = 21.7 Hz), 111.8, 69.7.

#### Synthesis of methyl 4-(3-(trifluoromethyl)phenoxy)butanoate (**2l**)<sup>[23]</sup>

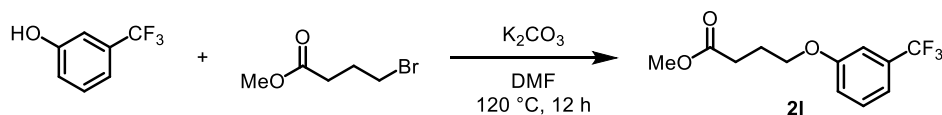

To a solution of 3-(trifluoromethyl)phenol (1.62 g, 10 mmol, 1.0 equiv.) in dry DMF (20 mL), methyl 4-bromobutanoate (1.9 mL, 15 mmol, 1.5 equiv.) and  $K_2CO_3$  (2.07 g, 15 mmol, 1.5 equiv.) were added under a nitrogen atmosphere. The mixture was stirred at 120 °C for 12 hours. The reaction mixture was cooled to room temperature. After completion (monitored by TLC), the reaction mixture was activated of 20 % hydrochloric acid and diluted with water (20 mL) and extracted with ethyl ether (30 mL). The combined organic layers were washed with water (2 x 30 mL), dried over anhydrous  $Na_2SO_4$ , filtered, concentrated *in vacuo* to give a residue. Purification by column chromatography on silica gel using petroleum ether and ethyl acetate (10:1 (v/v)) as eluent afforded **2l** as a colorless oil (0.5 g, 64% yield).



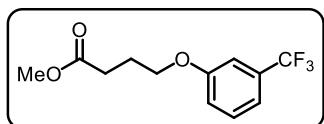

**NMR Spectroscopy:**  $^1\text{H}$  NMR (600 MHz,  $\text{CDCl}_3$ )  $\delta$  7.41 – 7.32 (m, 1H), 7.20 (d,  $J = 7.0$  Hz, 1H), 7.11 (s, 1H), 7.05 (d,  $J = 6.7$  Hz, 1H), 4.04 (t,  $J = 5.9$  Hz, 2H), 3.70 (s, 3H), 2.54 (t,  $J = 7.1$  Hz, 2H), 2.22 – 2.06 (m, 2H).  $^{19}\text{F}$  NMR (565 MHz,  $\text{CDCl}_3$ )  $\delta$  -62.73 – -62.82 (m, 3F).  $^{13}\text{C}$  NMR (151 MHz,  $\text{CDCl}_3$ )  $\delta$  173.7, 159.1, 132.1 (q,  $J = 30.9$  Hz), 130.1, 125.0 (q,  $J = 271.1$  Hz), 119.0, 118.1, 117.6, 111.4, 67.1, 51.8, 30.5, 24.6.

### Synthesis of Compound 2o

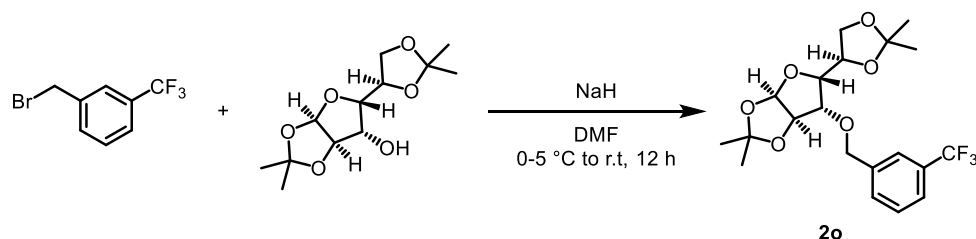

Under a nitrogen atmosphere, to a solution of diacetone-D-glucose (1.3 g, 5.0 mmol, 1.0 equiv.) in dry DMF (10 mL) was added NaH (0.30 g, 60% in mineral oil, 7.5 mmol, 1.5 equiv.) in batches at 0°C, followed by stirring for half an hour at this temperature. Finally, benzyl bromide (1.1 mL, 7.5 mmol, 1.5 equiv.) was added to the reaction solution and stirred overnight at room temperature. After completion (monitored by TLC), the reaction was quenched by  $\text{H}_2\text{O}$  (15 mL) and extracted by ethyl ether (10 mL). The organic phase was washed with water (2 x 25 mL), dried over anhydrous  $\text{Na}_2\text{SO}_4$ , filtered, concentrated *in vacuo* to give a residue. Purification by column chromatography on silica gel using petroleum ether and ethyl acetate (5:1 (v/v)) as eluent afforded **2o** as a white solid (1.7 g, 80% yield).

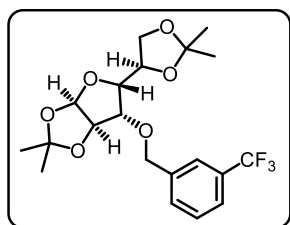

**NMR Spectroscopy:**  $^1\text{H}$  NMR (600 MHz,  $\text{CDCl}_3$ )  $\delta$  7.65 (s, 1H), 7.56 (d,  $J = 7.5$  Hz, 1H), 7.53 (d,  $J = 7.5$  Hz, 1H), 7.50 – 7.43 (m, 1H), 5.91 (d,  $J = 3.5$  Hz, 1H), 4.76 (d,  $J = 12.3$  Hz, 1H), 4.69 (d,  $J = 12.3$  Hz, 1H), 4.62 (d,  $J = 3.5$  Hz, 1H), 4.41 – 4.33 (m, 1H), 4.17 – 4.09 (m, 2H), 4.06 – 3.99 (m, 2H), 1.50 (s, 3H), 1.42 (s, 3H), 1.37 (s, 3H), 1.32 (s, 3H).  $^{19}\text{F}$  NMR (565 MHz,  $\text{CDCl}_3$ )  $\delta$  -62.57 (s, 3F).  $^{13}\text{C}$  NMR (151 MHz,  $\text{CDCl}_3$ )  $\delta$  138.8, 130.8, 128.9, 124.8 (q,  $J = 3.7$  Hz), 124.3 (q,  $J = 3.8$  Hz),

124.2 (q,  $J = 272.2$  Hz), 112.0, 109.3, 105.4, 82.6, 82.0, 81.5, 72.4, 71.5, 67.7, 26.9, 26.3, 25.3.

### Synthesis of Compound 2p

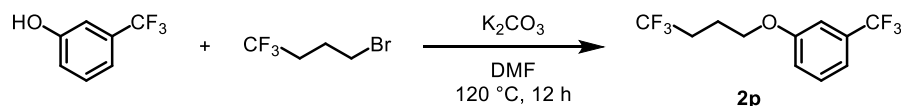

To a solution of 3-(trifluoromethyl)phenol (1.62 g, 10 mmol, 1.0 equiv.) in dry DMF (20 mL), 1-bromo-4,4,4-trifluorobutane (2.9 g, 15 mmol, 1.5 equiv.) and  $K_2CO_3$  (2.07 g, 15 mmol, 1.5 equiv.) were added under a nitrogen atmosphere. The mixture was stirred at 120 °C for 12 hours. After completion (monitored by TLC), the reaction mixture was cooled to room temperature. The reaction mixture was activated of 20 % hydrochloric acid and diluted with water (20 mL) and extracted with ethyl ether (30 mL). The combined organic layers were washed with water (2 x 30 mL), dried over anhydrous  $Na_2SO_4$ , filtered, concentrated *in vacuo* to give a residue. Purification by column chromatography on silica gel using petroleum ether and ethyl acetate (10:1 (v/v)) as eluent afforded **2p** as a colorless oil (2.2 g, 82% yield).

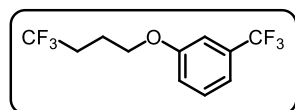

$R_f = 0.5$  (petroleum ether/EtOAc = 50:1). **NMR Spectroscopy:**

**$^1H$  NMR (500 MHz,  $CDCl_3$ )**  $\delta$  7.44 – 7.36 (m, 1H), 7.24 – 7.21 (m, 1H), 7.15 – 7.11 (m, 1H), 7.10 – 7.03 (m, 1H), 4.06 (t,  $J = 6.0$  Hz, 2H), 2.47 – 2.20 (m, 2H), 2.19 – 1.96 (m, 2H).  **$^{19}F$  NMR (470 MHz,  $CDCl_3$ )**  $\delta$  -62.80 (s, 3F), -66.40 (t,  $J = 10.8$  Hz, 3F).  **$^{13}C$  NMR (151 MHz,  $CDCl_3$ )**  $\delta$  158.9, 132.1 (q,  $J = 32.2$  Hz), 130.2, 127.2 (q,  $J = 275.9$  Hz), 124.1 (q,  $J = 272.1$  Hz), 118.0, 117.9 (q,  $J = 3.9$  Hz), 111.4 (q,  $J = 3.4$  Hz), 66.4, 30.8 (q,  $J = 29.2$  Hz), 22.2 (q,  $J = 3.1$  Hz).

### Synthesis of Compound 2q

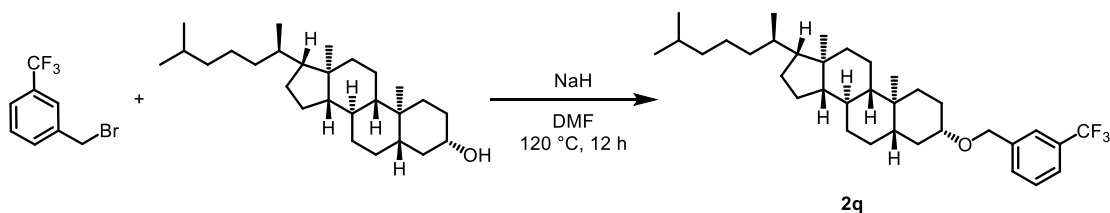

Under a nitrogen atmosphere, to a solution of dihydrocholesterol (1.9 g, 5.0 mmol, 1.0 equiv.) in dry DMF (10 mL) was added NaH (0.30 g, 60% in mineral oil, 7.5 mmol, 1.5 equiv.) in batches at 0 °C, followed by stirring for half an hour at this temperature. Finally, benzyl bromide (1.1 mL, 7.5 mmol, 1.5 equiv.) was added to the reaction solution and the mixture was stirred at 120 °C for 12 hours. The reaction mixture was cooled to room temperature. After completion (monitored by TLC), the reaction was quenched by H<sub>2</sub>O (15 mL) and extracted by ethyl ether (10 mL). The organic phase was washed with water (2 x 25 mL), dried over anhydrous Na<sub>2</sub>SO<sub>4</sub>, filtered, and the solvent was removed *in vacuo*. Purification by column chromatography on silica gel using petroleum ether and ethyl acetate (40:1 (v/v)) as eluent afforded **2q** as a white solid (464 mg, 17% yield).

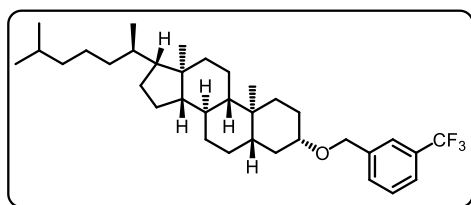

**NMR Spectroscopy:** <sup>1</sup>H NMR (600 MHz, CDCl<sub>3</sub>) δ 7.60 (s, 1H), 7.52 (s, 2H), 7.46 – 7.41 (m, 1H), 4.75 – 4.42 (m, 2H), 3.44 – 3.24 (m, 1H), 1.96 (d, *J* = 12.3 Hz, 1H), 1.91 (d, *J* = 12.2 Hz, 1H), 1.85 – 1.77 (m, 1H), 1.74 (d, *J* = 13.0 Hz, 1H), 1.67 (t, *J* = 14.1 Hz, 2H), 1.54 (s, 3H), 1.52 – 1.38 (m, 3H), 1.40 – 1.19 (m, 8H), 1.18 – 1.01 (m, 6H), 1.02 – 0.92 (m, 3H), 0.90 (d, *J* = 6.1 Hz, 3H), 0.86 (d, *J* = 3.8 Hz, 6H), 0.81 (s, 3H), 0.65 (s, 3H). <sup>19</sup>F NMR (565 MHz, CDCl<sub>3</sub>) δ -62.59 (s, 3F). <sup>13</sup>C NMR (151 MHz, CDCl<sub>3</sub>) δ 140.5, 130.8 (q, *J* = 32.3 Hz), 130.8, 128.9, 124.5 (q, *J* = 272.4 Hz), 124.3 (q, *J* = 3.5 Hz), 78.8, 69.3, 56.7, 56.5, 54.6, 45.0, 42.8, 40.2, 39.7, 37.2, 36.4, 36.0, 35.7, 35.0, 32.3, 29.0, 28.4, 28.4, 28.2, 24.4, 24.0, 23.0, 22.7, 21.4, 18.8, 12.5, 12.2.

### 3.3 The Scope of Arylthiols

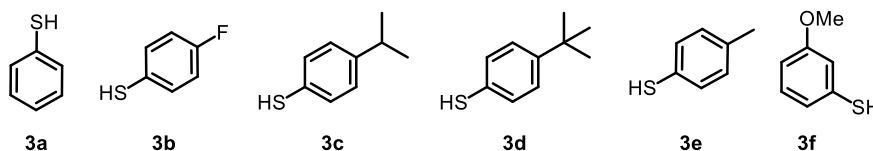

**Figure S5.** Scope of arylthiols.

**Note:** Substrates **3a-3f** are commercially available.

## 4 Experimental Procedures and Spectral Data

### 4.1 General Procedure

#### General Procedure A: Aryldifluoromethyl-thioetherification of alkenes

To a 20 mL oven dried screw-cap vial equipped with a magnetic stir bar was added *t*BuONa (1.8 mmol, 1.5 equiv.) in dry DMA (12 mL), followed by aryl thiols (1.8 mmol, 1.5 equiv.), trifluoromethyl aromatics (1.8 mmol, 1.5 equiv.) and alkenes (1.2 mmol, 1.0 equiv.) under a nitrogen atmosphere. The reaction mixture was stirred vigorously at room temperature and exposed to 30 W 365 nm LED for 2 hours. Then, the reaction was diluted with ethyl acetate (10 mL) and extracted with water (20 mL), saturated sodium chloride solution (2 x 30 mL), followed by reverse extraction of the mixed aqueous phase using ethyl acetate (30 mL). The combined organic layer was dried over anhydrous MgSO<sub>4</sub>, filtered and concentrated by rotary evaporation. The crude mixture was purified by column chromatography on silica gel (200~300 mesh) to afford the title compounds.

#### General Procedure B: Aryldifluoromethyl-sulfonylation of alkenes

To a 20 mL oven dried screw-cap vial equipped with a magnetic stir bar was added *t*BuONa (1.8 mmol, 1.5 equiv.) in dry DMA (12 mL), followed by aryl thiols (1.8 mmol, 1.5 equiv.), trifluoromethyl aromatics (1.8 mmol, 1.5 equiv.) and alkenes (1.2 mmol, 1.0 equiv.) under a nitrogen atmosphere. The reaction mixture was stirred vigorously at room temperature and exposed to 30 W 365 nm LED for 2 hours. After the completion of the reaction, the resulting reaction mixture was concentrated *in vacuo* yielding the crude product which was used in the next step without further purification. Next, a 50 mL round bottomed flask charged with crude product in DCM (24 mL) was added 85 wt% 3-chloroperoxybenzoic acid (3.6 mmol, 3.0 equiv.). The reaction mixture was stirred for 4 hours at room temperature. After the completion of the reaction, the reaction was diluted with dichloromethane (10 mL) and extracted with saturated sodium bicarbonate solution (30 mL) until the solution was neutral, and water (2 x 30 mL).

Then the organic layer was dried over anhydrous  $\text{MgSO}_4$ , filtered and concentrated by rotary evaporation. The crude mixture was purified by column chromatography on silica gel (200~300 mesh) to afford the title compounds.

## 4.2 Experimental Details and Characterization Data

### 1-(1,1-Difluoro-3-phenyl-3-(phenylsulfonyl)propyl)-2-methoxybenzene (**5a**)

General procedure B was used with thiophenol (184  $\mu\text{L}$ , 1.8 mmol, 1.5 equiv.), 1-methoxy-2-(trifluoromethyl)benzene (265  $\mu\text{L}$ , 1.8 mmol, 1.5 equiv.), styrene (138  $\mu\text{L}$ , 1.2 mmol, 1.0 equiv.),  $t\text{BuONa}$  (173 mg, 1.8 mmol, 1.5 equiv.) and 85 wt%  $m\text{CPBA}$  (730 mg, 3.6 mmol, 3.0 equiv.). Purification by column chromatography on silica gel using petroleum ether and ethyl acetate (10:1 (v/v)) as eluent afforded **5a** as a white solid (396 mg, 82% yield).

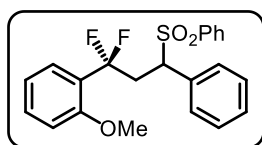

$R_f$  = 0.3 (petroleum ether/ ethyl acetate 10:1 (v/v)). **NMR Spectroscopy:**  $^1\text{H}$  NMR (600 MHz,  $\text{CDCl}_3$ )  $\delta$  7.56 – 7.47 (m, 3H), 7.39 – 7.34 (m, 2H), 7.30 – 7.26 (m, 1H), 7.25 – 7.21 (m, 1H), 7.21 – 7.17 (m, 1H), 7.14 – 7.08 (m, 2H), 6.97 (d,  $J$  = 7.4 Hz, 2H), 6.87 – 6.81 (m, 1H), 6.75 (d,  $J$  = 8.3 Hz, 1H), 4.20 – 4.14 (m, 1H), 3.72 (s, 3H), 3.55 – 3.42 (m, 1H), 3.38 – 3.22 (m, 1H).  $^{19}\text{F}$  NMR (565 MHz,  $\text{CDCl}_3$ )  $\delta$  -91.07 – -92.04 (m, 1F), -92.60 – -93.43 (m, 1F).  $^{13}\text{C}$  NMR (151 MHz,  $\text{CDCl}_3$ )  $\delta$  156.6, 136.9, 133.7, 131.8, 129.9, 129.1, 128.8, 128.7, 128.1, 126.5 (t,  $J$  = 8.8 Hz), 123.4 (t,  $J$  = 24.8 Hz), 121.1 (t,  $J$  = 245.1 Hz), 120.2, 119.5, 111.5, 67.03, 55.6, 35.2 (t,  $J$  = 27.4 Hz). **HRMS (ESI)** ( $m/z$ ):  $[\text{M}+\text{Na}]^+$  calcd for  $\text{C}_{22}\text{H}_{20}\text{F}_2\text{O}_3\text{SNa}^+$ , 425.0993; found 425.0999.

### 1-(1,1-Difluoro-3-phenyl-3-(phenylsulfonyl)propyl)-2-fluorobenzene (**5b**)

General procedure B was used with thiophenol (184  $\mu\text{L}$ , 1.8 mmol, 1.5 equiv.), 1-fluoro-2-(trifluoromethyl)benzene (228  $\mu\text{L}$ , 1.8 mmol, 1.5 equiv.), styrene (138  $\mu\text{L}$ , 1.2 mmol, 1.0 equiv.),  $t\text{BuONa}$  (173 mg, 1.8 mmol, 1.5 equiv.) and 85 wt%  $m\text{CPBA}$  (730 mg, 3.6 mmol, 3.0 equiv.). Purification by column chromatography on silica gel using petroleum ether and ethyl acetate (10:1 (v/v)) as eluent afforded **5b** as a white solid

(337 mg, 72% yield).

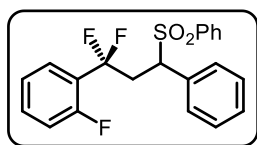

$R_f$  = 0.2 (petroleum ether/ ethyl acetate 10:1 (v/v)). **NMR**

**Spectroscopy:**  $^1\text{H}$  NMR (600 MHz,  $\text{CDCl}_3$ )  $\delta$  7.58 – 7.52 (m,

1H), 7.52 – 7.48 (m, 2H), 7.39 – 7.34 (m, 2H), 7.34 – 7.28 (m,

1H), 7.28 – 7.23 (m, 1H), 7.22 – 7.16 (m, 1H), 7.15 – 7.09 (m, 2H), 7.07 – 7.02 (m,

1H), 7.01 (d,  $J$  = 7.4 Hz, 2H), 6.98 – 6.92 (m, 1H), 4.28 (dd,  $J$  = 11.2, 1.3 Hz, 1H), 3.46

– 3.35 (m, 1H), 3.28 – 3.15 (m, 1H).  $^{19}\text{F}$  NMR (565 MHz,  $\text{CDCl}_3$ )  $\delta$  -91.37 – -92.32

(m, 1F), -93.53 – -94.39 (m, 1F), -113.87 – -114.32 (m, 1F).  $^{13}\text{C}$  NMR (151 MHz,

$\text{CDCl}_3$ )  $\delta$  159.5 (d,  $J$  = 251.6 Hz), 136.7, 133.9, 132.4 (d,  $J$  = 8.5 Hz), 131.7, 129.9,

129.2, 128.9 (d,  $J$  = 7.6 Hz), 128.4, 126.8 (t,  $J$  = 6.7 Hz), 124.1 (d,  $J$  = 3.4 Hz), 123.5

(t,  $J$  = 26.6 Hz), 123.4 (t,  $J$  = 26.7 Hz), 120.0 (t,  $J$  = 245.7 Hz), 116.5 (d,  $J$  = 21.1 Hz),

66.7, 36.1 (t,  $J$  = 27.8 Hz). **HRMS (ESI)** ( $m/z$ ):  $[\text{M}+\text{Na}]^+$  calcd for  $\text{C}_{21}\text{H}_{17}\text{F}_3\text{O}_2\text{SNa}^+$ ,

413.0794; found 413.0795.

### 1-(1,1-Difluoro-3-phenyl-3-(phenylsulfonyl)propyl)-4-fluorobenzene (**5c**)

General procedure B was used with thiophenol (184  $\mu\text{L}$ , 1.8 mmol, 1.5 equiv.), 1-fluoro-4-(trifluoromethyl)benzene (228  $\mu\text{L}$ , 1.8 mmol, 1.5 equiv.), styrene (138  $\mu\text{L}$ , 1.2 mmol, 1.0 equiv.),  $t\text{BuONa}$  (173 mg, 1.8 mmol, 1.5 equiv.) and 85 wt%  $m\text{CPBA}$  (730 mg, 3.6 mmol, 3.0 equiv.). Purification by column chromatography on silica gel using petroleum ether and ethyl acetate (5:1 (v/v)) as eluent afforded **5c** as a white solid (384 mg, 82% yield).

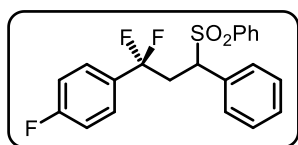

$R_f$  = 0.30 (petroleum ether/ ethyl acetate 5:1 (v/v)). **NMR**

**Spectroscopy:**  $^1\text{H}$  NMR (600 MHz,  $\text{CDCl}_3$ )  $\delta$  7.56 – 7.52 (m,

1H), 7.46 (d,  $J$  = 7.4 Hz, 2H), 7.39 – 7.33 (m, 2H), 7.33 – 7.28

(m, 2H), 7.25 – 7.23 (m, 1H), 7.20 – 7.15 (m, 2H), 7.05 – 6.97 (m, 4H), 4.26 (d,  $J$  =

10.1 Hz, 1H), 3.42 – 3.21 (m, 1H), 3.17 – 2.93 (m, 1H).  $^{19}\text{F}$  NMR (565 MHz,  $\text{CDCl}_3$ )

$\delta$  -91.73 – -92.55 (m, 1F), -92.69 – -93.70 (m, 1F), -110.75 – -111.42 (m, 1F).  $^{13}\text{C}$  NMR

(151 MHz,  $\text{CDCl}_3$ )  $\delta$  163.7 (d,  $J$  = 249.8 Hz), 136.5, 133.9, 132.2 (t,  $J$  = 24.8 Hz), 131.9,

129.9, 129.2, 129.0, 128.9, 128.5, 127.2 (dd,  $J$  = 14.5, 6.2 Hz), 121.4 (t,  $J$  = 245.4 Hz),

115.7 (d,  $J = 22.1$  Hz), 66.7, 37.3 (t,  $J = 28.6$  Hz). **HRMS (ESI)** ( $m/z$ ):  $[M+Na]^+$  calcd for  $C_{21}H_{17}F_3O_2SNa^+$ , 413.0794; found 413.0792.

### 1-(1,1-Difluoro-3-phenyl-3-(phenylsulfonyl)propyl)-2-methylbenzene (5d)

General procedure B was used with thiophenol (184  $\mu$ L, 1.8 mmol, 1.5 equiv.), 1-methyl-2-(trifluoromethyl)benzene (246  $\mu$ L, 1.8 mmol, 1.5 equiv.), styrene (138  $\mu$ L, 1.2 mmol, 1.0 equiv.), *t*BuONa (173 mg, 1.8 mmol, 1.5 equiv.) and 85 wt% *m*CPBA (3730 mg, 3.6 mmol, 3.0 equiv.). Purification by column chromatography on silica gel using petroleum ether and ethyl acetate (10:1 (v/v)) as eluent afforded **5d** as a white solid (371 mg, 80% yield).

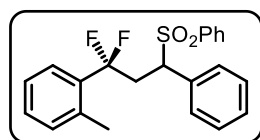

$R_f = 0.3$  (petroleum ether/ ethyl acetate 10:1 (v/v)). **NMR**

**Spectroscopy:**  $^1H$  NMR (600 MHz,  $CDCl_3$ )  $\delta$  7.57 – 7.52 (m, 1H), 7.48 (d,  $J = 7.4$  Hz, 2H), 7.41 – 7.33 (m, 2H), 7.29 – 7.26

(m, 2H), 7.25 (s, 1H), 7.23 – 7.17 (m, 2H), 7.17 – 7.12 (m, 2H), 7.06 (d,  $J = 7.4$  Hz, 2H), 4.31 (d,  $J = 11.0$  Hz, 1H), 3.44 – 3.25 (m, 1H), 3.15 – 2.97 (m, 1H), 2.33 (s, 3H).  $^{19}F$  NMR (565 MHz,  $CDCl_3$ )  $\delta$  -91.14 (ddd,  $J = 248.2, 21.4, 7.6$  Hz, 1F), -92.93 (ddd,  $J = 248.4, 20.7, 12.9$  Hz, 1F).  $^{13}C$  NMR (151 MHz,  $CDCl_3$ )  $\delta$  136.7, 135.4, 134.1 (t,  $J = 24.0$  Hz), 133.8, 132.2, 132.1, 130.2, 129.9, 129.2, 128.9, 128.9, 128.5, 125.9, 125.7 (t,  $J = 8.9$  Hz), 122.5 (t,  $J = 246.2$  Hz), 66.7, 36.5 (t,  $J = 27.8$  Hz), 20.1. **HRMS (ESI)** ( $m/z$ ):  $[M+Na]^+$  calcd for  $C_{22}H_{20}F_2O_2SNa^+$ , 409.1044; found 409.1053.

### 1-(1,1-Difluoro-3-phenyl-3-(phenylsulfonyl)propyl)-3-methylbenzene (5e)

General procedure B was used with thiophenol (184  $\mu$ L, 1.8 mmol, 1.5 equiv.), 1-methyl-3-(trifluoromethyl)benzene (251  $\mu$ L, 1.8 mmol, 1.5 equiv.), styrene (138  $\mu$ L, 1.2 mmol, 1.0 equiv.), *t*BuONa (173 mg, 1.8 mmol, 1.5 equiv.) and 85 wt% *m*CPBA (730 mg, 3.6 mmol, 3.0 equiv.). Purification by column chromatography on silica gel using petroleum ether and ethyl acetate (10:1 (v/v)) as eluent afforded **5e** as a white solid (357 mg, 77% yield).

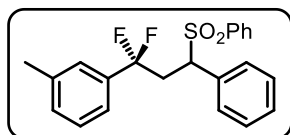

$R_f = 0.3$  (petroleum ether/ ethyl acetate 10:1 (v/v)). **NMR**

**Spectroscopy:**  $^1\text{H}$  NMR (600 MHz,  $\text{CDCl}_3$ )  $\delta$  7.57 – 7.50 (m, 1H), 7.47 (d,  $J = 7.5$  Hz, 2H), 7.39 – 7.31 (m, 2H), 7.25 – 7.21

(m, 2H), 7.21 – 7.15 (m, 3H), 7.15 – 7.08 (m, 2H), 7.05 (d,  $J = 7.4$  Hz, 2H), 4.29 (d,  $J = 11.0$  Hz, 1H), 3.40 – 3.20 (m, 1H), 3.14 – 2.90 (m, 1H), 2.32 (s, 3H).  $^{19}\text{F}$  NMR (565 MHz,  $\text{CDCl}_3$ )  $\delta$  -92.68 (ddd,  $J = 244.7, 20.3, 8.2$  Hz, 1F), -94.40 – -95.16 (m, 1F).  $^{13}\text{C}$  NMR (151 MHz,  $\text{CDCl}_3$ )  $\delta$  138.5, 136.7, 136.1 (t,  $J = 26.2$  Hz), 133.9, 132.1, 131.0, 130.0, 129.2, 128.9, 128.8, 128.6, 128.4, 125.6 (t,  $J = 6.0$  Hz), 122.0 (t,  $J = 6.0$  Hz), 121.8 (t,  $J = 244.7$  Hz), 66.8, 37.4 (t,  $J = 28.4$  Hz), 21.5. **HRMS (ESI)** ( $m/z$ ):  $[\text{M}+\text{Na}]^+$  calcd for  $\text{C}_{22}\text{H}_{20}\text{F}_2\text{O}_2\text{SNa}^+$ , 409.1044; found 409.1055.

#### (1,1-Difluoro-3-(phenylsulfonyl)propane-1,3-diyl)dibenzene (5f)

General procedure B was used with thiophenol (184  $\mu\text{L}$ , 1.8 mmol, 1.5 equiv.), (trifluoromethyl)benzene (221  $\mu\text{L}$ , 1.8 mmol, 1.5 equiv.), styrene (138  $\mu\text{L}$ , 1.2 mmol, 1.0 equiv.), *t*BuONa (173 mg, 1.8 mmol, 1.5 equiv.) and 85 wt% *m*CPBA (730 mg, 3.6 mmol, 3.0 equiv.). Purification by column chromatography on silica gel using petroleum ether and ethyl acetate (10:1 (v/v)) as eluent afforded **5f** as a white solid (388 mg, 87% yield).

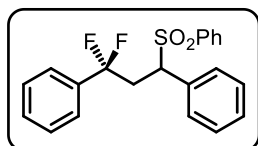

$R_f = 0.3$  (petroleum ether/ ethyl acetate 10:1 (v/v)). **NMR**

**Spectroscopy:**  $^1\text{H}$  NMR (600 MHz,  $\text{CDCl}_3$ )  $\delta$  7.56 – 7.51 (m, 1H), 7.46 (d,  $J = 7.4$  Hz, 2H), 7.42 – 7.37 (m, 1H), 7.37 – 7.30

(m, 6H), 7.26 – 7.23 (m, 1H), 7.21 – 7.14 (m, 2H), 7.05 (d,  $J = 7.4$  Hz, 2H), 4.29 (d,  $J = 9.9$  Hz, 1H), 3.44 – 3.22 (m, 1H), 3.17 – 2.93 (m, 1H).  $^{19}\text{F}$  NMR (565 MHz,  $\text{CDCl}_3$ )  $\delta$  -92.43 (ddd,  $J = 245.4, 20.4, 8.3$  Hz, 1F), -95.21 (ddd,  $J = 245.3, 19.9, 13.6$  Hz, 1F).  $^{13}\text{C}$  NMR (151 MHz,  $\text{CDCl}_3$ )  $\delta$  136.7, 136.2 (t,  $J = 26.0$  Hz), 133.9, 132.1, 130.3, 130.0, 129.2, 129.0, 128.8, 128.7, 128.5, 125.0 (t,  $J = 6.1$  Hz), 121.7 (t,  $J = 245.2$  Hz), 66.8, 37.4 (t,  $J = 28.3$  Hz). **HRMS (ESI)** ( $m/z$ ):  $[\text{M}+\text{Na}]^+$  calcd for  $\text{C}_{21}\text{H}_{18}\text{F}_2\text{O}_2\text{SNa}^+$ , 395.0888; found 395.0898.

#### 1-(Benzyloxy)-3-(1,1-difluoro-3-phenyl-3-(phenylsulfonyl)propyl)benzene (5g)



General procedure B was used with thiophenol (184  $\mu$ L, 1.8 mmol, 1.5 equiv.), 1-(benzyloxy)-3-(trifluoromethyl)benzene (454 mg, 1.8 mmol, 1.5 equiv.), styrene (138  $\mu$ L, 1.2 mmol, 1.0 equiv.), *t*BuONa (173 mg, 1.8 mmol, 1.5 equiv.) and 85 wt% *m*CPBA (730 mg, 3.6 mmol, 3.0 equiv.). Purification by column chromatography on silica gel using petroleum ether and ethyl acetate (10:1 (v/v)) as eluent afforded **5g** as a white solid (407 mg, 71% yield).

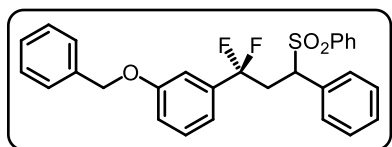

$R_f$  = 0.2 (petroleum ether/ ethyl acetate 10:1 (v/v)).

**NMR Spectroscopy:**  $^1\text{H}$  NMR (600 MHz,  $\text{CDCl}_3$ )  $\delta$  7.57 – 7.50 (m, 1H), 7.46 (d,  $J$  = 7.5 Hz, 2H), 7.44 – 7.38 (m, 4H), 7.38 – 7.31 (m, 3H), 7.29 – 7.23 (m, 2H), 7.21 – 7.15 (m, 2H), 7.03 (d,  $J$  = 7.4 Hz, 2H), 6.98 (d,  $J$  = 7.5 Hz, 1H), 6.92 (m, 2H), 5.02 (s, 2H), 4.28 (d,  $J$  = 10.5 Hz, 1H), 3.39 – 3.22 (m, 1H), 3.13 – 2.91 (m, 1H).  $^{19}\text{F}$  NMR (565 MHz,  $\text{CDCl}_3$ )  $\delta$  -92.53 (ddd,  $J$  = 244.5, 20.0, 8.7 Hz, 1F), -94.87 (ddd,  $J$  = 244.6, 18.8, 14.0 Hz, 1F).  $^{13}\text{C}$  NMR (151 MHz,  $\text{CDCl}_3$ )  $\delta$  158.9, 137.6 (t,  $J$  = 26.2 Hz), 136.6, 133.9, 132.1, 130.0, 129.2, 128.9, 128.8, 128.8, 128.5, 128.3, 127.7, 121.5 (t,  $J$  = 245.6 Hz), 117.5 (d,  $J$  = 6.0 Hz), 116.8, 70.3, 66.8, 37.3 (t,  $J$  = 28.3 Hz). **HRMS (ESI)** ( $m/z$ ):  $[\text{M}+\text{Na}]^+$  calcd for  $\text{C}_{28}\text{H}_{24}\text{F}_2\text{O}_3\text{SNa}^+$ , 501.1306; found 501.1317.

### 1-(1,1-Difluoro-3-phenyl-3-(phenylsulfonyl)propyl)-3-((4-fluorobenzyl)oxy)benzene (**5h**)

General procedure B was used with thiophenol (184  $\mu$ L, 1.8 mmol, 1.5 equiv.), 1-((4-fluorobenzyl)oxy)-3-(trifluoromethyl)benzene (486.4 mg, 1.8 mmol, 1.5 equiv.), styrene (138  $\mu$ L, 1.2 mmol, 1.0 equiv.), *t*BuONa (173 mg, 1.8 mmol, 1.5 equiv.) and 85 wt% *m*CPBA (730 mg, 3.6 mmol, 3.0 equiv.). Purification by column chromatography on silica gel using petroleum ether and ethyl acetate (10:1 (v/v)) as eluent afforded **5h** as a white solid (524 mg, 88% yield).

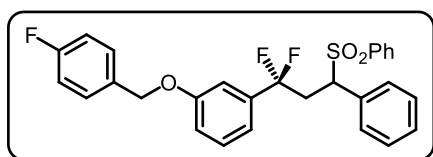

$R_f$  = 0.30 (petroleum ether/ ethyl acetate 10:1 (v/v)).

**NMR Spectroscopy:**  $^1\text{H}$  NMR (600 MHz,  $\text{CDCl}_3$ )  $\delta$  7.57 – 7.50 (m, 1H), 7.46 (d,  $J$  = 7.5 Hz, 2H), 7.42 – 7.37 (m, 2H), 7.38 – 7.33 (m, 2H), 7.30 – 7.27 (m, 1H), 7.26 – 7.23 (m, 1H), 7.21 –

7.15 (m, 2H), 7.12 – 7.06 (m, 2H), 7.04 (d,  $J = 7.5$  Hz, 2H), 6.97 (d,  $J = 8.2$  Hz, 1H), 6.94 (d,  $J = 7.7$  Hz, 1H), 6.92 (s, 1H), 4.97 (s, 2H), 4.29 (d,  $J = 10.3$  Hz, 1H), 3.43 – 3.22 (m, 1H), 3.14 – 2.96 (m, 1H).  **$^{19}\text{F}$  NMR** (565 MHz,  $\text{CDCl}_3$ )  $\delta$  -92.50 (ddd,  $J = 244.5, 20.2, 8.4$  Hz, 1F), -94.89 (ddd,  $J = 244.7, 19.3, 13.4$  Hz, 1F), -113.60 – -114.15 (m, 1F).  **$^{13}\text{C}$  NMR** (151 MHz,  $\text{CDCl}_3$ )  $\delta$  162.7 (d,  $J = 246.5$  Hz), 158.8, 137.7 (t,  $J = 26.0$  Hz), 136.6, 133.9, 132.2 (d,  $J = 42.6$  Hz), 130.0, 129.9, 129.5, 129.5, 129.2, 128.9, 128.8, 128.4, 121.5 (t,  $J = 245.5$  Hz), 117.6 (t,  $J = 6.0$  Hz), 116.8, 115.7 (d,  $J = 21.6$  Hz), 111.5, 69.6, 66.7, 37.3 (t,  $J = 28.3$  Hz). **HRMS (ESI)** ( $m/z$ ):  $[\text{M}+\text{Na}]^+$  calcd for  $\text{C}_{28}\text{H}_{23}\text{F}_3\text{O}_3\text{SNa}^+$ , 519.1212; found 519.1214.

### 1-(1,1-Difluoro-3-phenyl-3-(phenylsulfonyl)propyl)-3-((4-methoxybenzyl)oxy)benzene (**5i**)

General procedure B was used with thiophenol (184  $\mu\text{L}$ , 1.8 mmol, 1.5 equiv.), 1-((4-methoxybenzyl)oxy)-3-(trifluoromethyl)benzene (508 mg, 1.8 mmol, 1.5 equiv.), styrene (138  $\mu\text{L}$ , 1.2 mmol, 1.0 equiv.),  $t\text{BuONa}$  (173 mg, 1.8 mmol, 1.5 equiv.) and 85 wt%  $m\text{CPBA}$  (730 mg, 3.6 mmol, 3.0 equiv.). Purification by column chromatography on silica gel using petroleum ether and ethyl acetate (10:1 (v/v)) as eluent afforded **5i** as a white solid (500 mg, 82% yield).

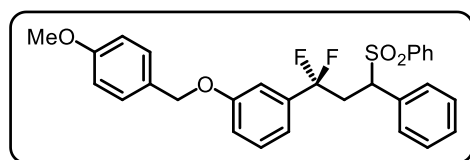

$R_f = 0.30$  (petroleum ether/ ethyl acetate 10:1 (v/v)). **NMR Spectroscopy:**  **$^1\text{H}$  NMR** (600 MHz,  $\text{CDCl}_3$ )  $\delta$  7.56 – 7.50 (m, 1H), 7.46 (d,  $J = 7.7$  Hz, 2H), 7.39 – 7.31 (m, 4H), 7.28 – 7.23 (m, 2H), 7.21 – 7.16 (m, 2H), 7.04 (d,  $J = 7.5$  Hz, 2H), 6.97 (d,  $J = 7.4$  Hz, 1H), 6.96 – 6.87 (m, 4H), 4.94 (s, 2H), 4.28 (d,  $J = 10.3$  Hz, 1H), 3.83 (s, 3H), 3.36 – 3.24 (m, 1H), 3.09 – 2.97 (m, 1H).  **$^{19}\text{F}$  NMR** (565 MHz,  $\text{CDCl}_3$ )  $\delta$  -92.42 (ddd,  $J = 244.6, 19.7, 7.9$  Hz, 1F), -94.50 – -95.49 (m, 1F).  **$^{13}\text{C}$  NMR** (151 MHz,  $\text{CDCl}_3$ )  $\delta$  159.8, 159.0, 137.6 (t,  $J = 25.7$  Hz), 136.7, 133.9, 132.1, 130.0, 129.9, 129.4, 129.2, 128.9, 128.8, 128.7, 128.5, 121.6 (t,  $J = 245.7$  Hz), 117.4 (t,  $J = 6.1$  Hz), 116.9, 114.3, 111.6 (t,  $J = 5.7$  Hz), 70.1, 66.8, 55.5, 37.3 (t,  $J = 28.1$  Hz). **HRMS (ESI)** ( $m/z$ ):  $[\text{M}+\text{Na}]^+$  calcd for  $\text{C}_{29}\text{H}_{26}\text{F}_2\text{O}_4\text{SNa}^+$ , 531.1412; found 531.1419.

### 2-(3-(1,1-Difluoro-3-phenyl-3-(phenylsulfonyl)propyl)phenoxy)pyridine (**5j**)

General procedure B was used with thiophenol (184  $\mu$ L, 1.8 mmol, 1.5 equiv.), 2-(3-(trifluoromethyl)phenoxy)pyridine (430 mg, 1.8 mmol, 1.5 equiv.), styrene (138  $\mu$ L, 1.2 mmol, 1.0 equiv.), *t*BuONa (173 mg, 1.8 mmol, 1.5 equiv.) and 85 wt% *m*CPBA (730 mg, 3.6 mmol, 3.0 equiv.). Purification by column chromatography on silica gel using petroleum ether and ethyl acetate (10:1 (v/v)) as eluent afforded **5j** as a white solid (374 mg, 67% yield).

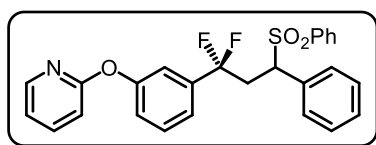

$R_f$  = 0.20 (petroleum ether/ ethyl acetate 10:1 (v/v)).

**NMR Spectroscopy:**  $^1\text{H}$  NMR (600 MHz,  $\text{CDCl}_3$ )  $\delta$  8.22 – 8.16 (m, 1H), 7.75 – 7.67 (m, 1H), 7.57 – 7.51 (m, 1H), 7.50 – 7.45 (m, 2H), 7.40 – 7.33 (m, 3H), 7.24 (d,  $J$  = 7.4 Hz, 1H), 7.20 – 7.13 (m, 4H), 7.05 – 7.01 (m, 1H), 7.06 (d,  $J$  = 7.3 Hz, 2H), 7.05 – 7.01 (m, 1H), 6.92 (d,  $J$  = 8.3 Hz, 1H), 4.32 (dd,  $J$  = 11.1, 1.7 Hz, 1H), 3.38 – 3.22 (m, 1H), 3.11 – 2.97 (m, 1H).  $^{19}\text{F}$  NMR (565 MHz,  $\text{CDCl}_3$ )  $\delta$  -92.18 (ddd,  $J$  = 245.3, 20.2, 7.9 Hz, 1F), -95.24 (ddd,  $J$  = 245.7, 19.5, 13.5 Hz, 1F).  $^{13}\text{C}$  NMR (151 MHz,  $\text{CDCl}_3$ )  $\delta$  163.3, 154.4, 147.8, 139.8, 137.8 (t,  $J$  = 26.5 Hz), 136.6, 133.9, 132.0, 130.1, 130.0, 129.2, 129.0, 128.8, 128.5, 123.02, 121.3 (t,  $J$  = 245.8 Hz), 121.1 (t,  $J$  = 5.8 Hz), 119.1, 118.1 (t,  $J$  = 6.2 Hz), 112.0, 66.6, 37.3 (t,  $J$  = 28.2 Hz). **HRMS (ESI)** ( $m/z$ ):  $[\text{M}+\text{Na}]^+$  calcd for  $\text{C}_{26}\text{H}_{21}\text{F}_2\text{NO}_3\text{SNa}^+$ , 488.1102; found 488.1106.

### Methyl-4-(3-(1,1-difluoro-3-phenyl-3-(phenylsulfonyl)propyl)phenoxy)butanoate (**5k**)

General procedure B was used with thiophenol (184  $\mu$ L, 1.8 mmol, 1.5 equiv.), methyl 4-(3-(trifluoromethyl)phenoxy)butanoate (472 mg, 1.8 mmol, 1.5 equiv.), styrene (138  $\mu$ L, 1.2 mmol, 1.0 equiv.), *t*BuONa (173 mg, 1.8 mmol, 1.5 equiv.) and 85 wt% *m*CPBA (730 mg, 3.6 mmol, 3.0 equiv.). Purification by column chromatography on silica gel using petroleum ether and ethyl acetate (3:1 (v/v)) as eluent afforded **5k** as a white solid (363 mg, 62% yield).

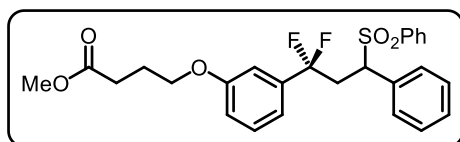

$R_f$  = 0.35 (petroleum ether/ ethyl acetate 3:1 (v/v)). **NMR Spectroscopy:**  $^1\text{H}$  NMR (600 MHz,  $\text{CDCl}_3$ )  $\delta$  7.55 – 7.50 (m, 1H), 7.46 (d,  $J$  = 7.4 Hz,

2H), 7.38 – 7.31 (m, 2H), 7.24 (d,  $J$  = 7.2 Hz, 2H), 7.21 – 7.15 (m, 2H), 7.04 (d,  $J$  = 7.0 Hz, 2H), 6.92 – 6.86 (m, 2H), 6.80 (s, 1H), 4.28 (d,  $J$  = 10.9 Hz, 1H), 3.95 (s, 2H), 3.69 (s, 3H), 3.36 – 3.23 (m, 1H), 3.12 – 2.96 (m, 1H), 2.52 (t,  $J$  = 6.5 Hz, 2H), 2.12 – 2.07 (m, 2H).  $^{19}\text{F}$  NMR (565 MHz,  $\text{CDCl}_3$ )  $\delta$  -92.27 (ddd,  $J$  = 246.5, 17.7, 10.7 Hz, 1F), -94.00 – -94.70 (m, 1F).  $^{13}\text{C}$  NMR (151 MHz,  $\text{CDCl}_3$ )  $\delta$  173.7, 159.0, 137.6 (t,  $J$  = 25.7 Hz), 136.6, 133.9, 132.1, 129.9, 129.8, 129.2, 128.9, 128.8, 128.4, 121.5 (t,  $J$  = 245.5 Hz), 117.3 (t,  $J$  = 6.0 Hz), 116.4, 111.1, 66.9, 66.7, 51.8, 37.3 (t,  $J$  = 28.4 Hz), 30.6, 24.6. **HRMS (ESI)** ( $m/z$ ):  $[\text{M}+\text{Na}]^+$  calcd for  $\text{C}_{26}\text{H}_{26}\text{F}_2\text{O}_5\text{SNa}^+$ , 511.1361; found 511.1366.

### 1-(3-(1,1-Difluoro-3-phenyl-3-(phenylsulfonyl)propyl)phenyl)cyclobutan-1-ol (5l)

General procedure B was used with thiophenol (184  $\mu\text{L}$ , 1.8 mmol, 1.5 equiv.), 1-(3-(trifluoromethyl)-phenyl)cyclobutan-1-ol (389 mg, 1.8 mmol, 1.5 equiv.), styrene (138  $\mu\text{L}$ , 1.2 mmol, 1.0 equiv.),  $t\text{BuONa}$  (173 mg, 1.8 mmol, 1.5 equiv.) and 85 wt%  $m\text{CPBA}$  (730 mg, 3.6 mmol, 3.0 equiv.). Purification by column chromatography on silica gel using petroleum ether and ethyl acetate (3:1 (v/v)) as eluent afforded **5k** as a white solid (186 mg, 35% yield).

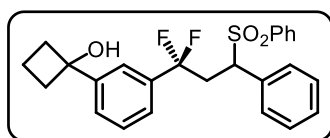

$R_f$  = 0.30 (petroleum ether/ ethyl acetate 3:1 (v/v)). **NMR Spectroscopy:**  $^1\text{H}$  NMR (600 MHz,  $\text{CDCl}_3$ )  $\delta$  7.57 – 7.49 (m, 2H), 7.48 – 7.44 (m, 2H), 7.42 (s, 1H), 7.39 – 7.32 (m,

3H), 7.27 (s, 1H), 7.25 – 7.21 (m, 1H), 7.18 – 7.13 (m, 2H), 7.02 (d,  $J$  = 7.3 Hz, 2H), 4.29 (dd,  $J$  = 11.1, 1.7 Hz, 1H), 3.46 – 3.25 (m, 1H), 3.13 – 2.98 (m, 1H), 2.55 – 2.42 (m, 2H), 2.42 – 2.29 (m, 2H), 2.09 – 1.99 (m, 1H), 1.90 (s, 1H), 1.72 – 1.64 (m, 1H).  $^{19}\text{F}$  NMR (565 MHz,  $\text{CDCl}_3$ )  $\delta$  -91.31 – -92.02 (m, 1F), -92.03 – -92.88 (m, 1F).  $^{13}\text{C}$  NMR (151 MHz,  $\text{CDCl}_3$ )  $\delta$  147.1, 136.5, 136.3 (t,  $J$  = 25.7 Hz), 133.9, 132.0, 130.0, 129.2, 128.9, 128.8, 128.8, 128.4, 126.9, 123.8 (t,  $J$  = 5.9 Hz), 121.8 (t,  $J$  = 245.3 Hz),

121.5 (t,  $J = 6.0$  Hz), 76.9, 66.8, 37.5, 37.3, 37.1 (t,  $J = 6.5$  Hz), 13.1. **HRMS (ESI)** ( $m/z$ ):  $[M+Na]^+$  calcd for  $C_{25}H_{24}F_2O_3SNa^+$ , 465.1306; found 465.1315.

***tert*-Butyl-(3-(1,1-difluoro-3-phenyl-3-(phenylsulfonyl)propyl)benzyl)carbamate (5m)**

General procedure B was used with thiophenol (184  $\mu$ L, 1.8 mmol, 1.5 equiv.), *tert*-butyl (3-(trifluoromethyl)benzyl)carbamate (495 mg, 1.8 mmol, 1.5 equiv.), styrene (138  $\mu$ L, 1.2 mmol, 1.0 equiv.), *t*BuONa (173 mg, 1.8 mmol, 1.5 equiv.) and 85 wt% *m*CPBA (730 mg, 3.6 mmol, 3.0 equiv.). Purification by column chromatography on silica gel using petroleum ether and ethyl acetate (10:1 (v/v)) as eluent afforded **5m** as a white solid (427 mg, 71% yield).

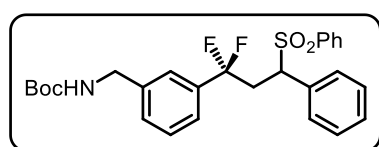

$R_f = 0.25$  (petroleum ether/ ethyl acetate 10:1 (v/v)).

**NMR Spectroscopy:**  $^1H$  NMR (600 MHz,  $CDCl_3$ )  $\delta$  7.32 – 7.27 (m, 2H), 7.25 – 7.19 (m, 8H), 7.18 (d,  $J =$

7.0 Hz, 1H), 7.17 – 7.12 (m, 3H), 4.77 (s, 1H), 4.31 (dd,  $J = 9.3, 3.2$  Hz, 1H), 4.29 – 4.21 (m, 2H), 2.95 – 2.83 (m, 1H), 2.83 – 2.71 (m, 1H), 1.47 (s, 9H).  $^{19}F$  NMR (565 MHz,  $CDCl_3$ )  $\delta$  -93.19 (d,  $J = 7.9$  Hz, 2F).  $^{13}C$  NMR (151 MHz,  $CDCl_3$ )  $\delta$  156.0, 140.7, 139.4, 137.1 (t,  $J = 24.7$  Hz), 134.2, 133.0, 129.1, 128.9, 128.5, 128.0, 127.8, 127.5, 124.1 (t,  $J = 5.7$  Hz), 121.9 (t,  $J = 245.7$  Hz), 79.9 (t,  $J = 5.2$  Hz), 47.6, 47.6, 44.9 (t,  $J = 27.5$  Hz), 44.5, 28.5. **HRMS (ESI)** ( $m/z$ ):  $[M+Na]^+$  calcd for :  $C_{27}H_{29}F_2NO_4SNa^+$ , 524.1678; found 524.1678.

**1-(1,1-Difluoro-3-phenyl-3-(phenylsulfonyl)propyl)-3-methoxybenzene (5n)**

General procedure B was used with thiophenol (184  $\mu$ L, 1.8 mmol, 1.5 equiv.), 3-(trifluoromethyl)anisole (260  $\mu$ L, 1.8 mmol, 1.5 equiv.), styrene (138  $\mu$ L, 1.2 mmol, 1.0 equiv.), *t*BuONa (173 mg, 1.8 mmol, 1.5 equiv.) and 85 wt% *m*CPBA (730 mg, 3.6 mmol, 3.0 equiv.). Purification by column chromatography on silica gel using petroleum ether and ethyl acetate (5:1 (v/v)) as eluent afforded **5n** as a white solid (390 mg, 81% yield).

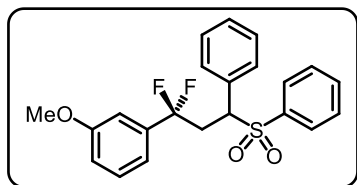

$R_f$  = 0.30 (petroleum ether/ ethyl acetate 5:1 (v/v)). **NMR**

**Spectroscopy:**  $^1\text{H}$  NMR (600 MHz,  $\text{CDCl}_3$ )  $\delta$  7.57 – 7.51 (m, 1H), 7.46 (d,  $J$  = 7.4 Hz, 2H), 7.39 – 7.31 (m, 2H), 7.28 – 7.23 (m, 2H), 7.23 – 7.11 (m, 2H), 7.05 (d,  $J$

= 7.0 Hz, 2H), 6.91 (d,  $J$  = 7.5 Hz, 2H), 6.82 (s, 1H), 4.28 (d,  $J$  = 10.9 Hz, 1H), 3.77 (s, 3H), 3.39 – 3.21 (m, 1H), 3.13 – 2.94 (m, 1H).  $^{19}\text{F}$  NMR (565 MHz,  $\text{CDCl}_3$ )  $\delta$  -92.24 (ddd,  $J$  = 244.2, 20.1, 8.4 Hz, 1F), -94.97 (ddd,  $J$  = 244.5, 19.2, 13.7 Hz, 1F).  $^{13}\text{C}$  NMR (151 MHz,  $\text{CDCl}_3$ )  $\delta$  159.7, 137.5 (t,  $J$  = 26.2 Hz), 136.5, 133.9, 132.0, 130.0, 129.9, 129.2, 128.9, 128.8, 128.4, 121.5 (t,  $J$  = 245.6 Hz), 117.2 (t,  $J$  = 6.2 Hz), 116.0, 110.4 (t,  $J$  = 6.2 Hz), 66.7, 55.4, 37.3 (t,  $J$  = 28.4 Hz). **HRMS (ESI)** ( $m/z$ ):  $[\text{M}+\text{Na}]^+$  calcd for  $\text{C}_{22}\text{H}_{20}\text{F}_2\text{O}_3\text{SNa}^+$ , 425.0993; found 425.0995.

### 1-(1,1-Difluoro-3-((4-fluorophenyl)sulfonyl)-3-phenylpropyl)-3-methoxybenzene (5o)

General procedure B was used with 4-fluorothiophenol (192  $\mu\text{L}$ , 1.8 mmol, 1.5 equiv.), 3-(trifluoromethyl)anisole (260  $\mu\text{L}$ , 1.8 mmol, 1.5 equiv.), styrene (138  $\mu\text{L}$ , 1.2 mmol, 1.0 equiv.),  $t\text{BuONa}$  (173 mg, 1.8 mmol, 1.5 equiv.) and 85 wt%  $m\text{CPBA}$  (730 mg, 3.6 mmol, 3.0 equiv.). Purification by column chromatography on silica gel using petroleum ether and ethyl acetate (5:1 (v/v)) as eluent afforded **5o** as a white solid (267 mg, 53% yield).

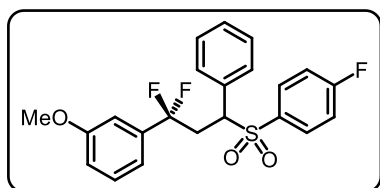

$R_f$  = 0.50 (petroleum ether/ ethyl acetate 5:1 (v/v)).

**NMR Spectroscopy:**  $^1\text{H}$  NMR (600 MHz,  $\text{CDCl}_3$ )  $\delta$  7.48 – 7.40 (m, 2H), 7.30 – 7.26 (m, 2H), 7.24 – 7.17 (m, 2H), 7.08 – 6.98 (m, 4H), 6.95 – 6.88 (m, 2H), 6.82 (s, 1H), 4.26 (d,  $J$  = 11.0 Hz, 1H), 3.78 (s, 3H), 3.38 – 3.24 (m, 1H), 3.11 – 2.97 (m, 1H).  $^{19}\text{F}$  NMR (565 MHz,  $\text{CDCl}_3$ )  $\delta$  -92.34 (ddd,  $J$  = 244.7, 20.0, 8.1 Hz, 1F), -94.91 (ddd,  $J$  = 244.6, 18.9, 13.9 Hz, 1F), -102.92 – -103.07 (m, 1F).  $^{13}\text{C}$  NMR (151 MHz,  $\text{CDCl}_3$ )  $\delta$  166.0 (d,  $J$  = 257.0 Hz), 159.8, 137.5 (t,  $J$  = 25.8 Hz), 132.6, 132.0, 132.0, 129.9, 129.9, 129.1, 128.6, 121.5 (t,  $J$  = 245.3 Hz), 117.2 (t,  $J$  = 6.0 Hz), 116.2, 116.1 (d,  $J$  = 5.4 Hz), 110.5 (t,  $J$  = 5.7 Hz), 67.0, 55.5, 37.2 (t,  $J$  = 28.4 Hz). **HRMS (ESI)** ( $m/z$ ):  $[\text{M}+\text{Na}]^+$  calcd for

C<sub>22</sub>H<sub>19</sub>F<sub>3</sub>O<sub>3</sub>SNa<sup>+</sup>, 443.0899; found 443.0901.

**1-(1,1-Difluoro-3-((4-isopropylphenyl)sulfonyl)-3-phenylpropyl)-3-methoxybenzene (5p)**

General procedure B was used with 4-isopropylbenzenethiol (280  $\mu$ L, 1.8 mmol, 1.5 equiv.), 3-(trifluoromethyl)anisole (260  $\mu$ L, 1.8 mmol, 1.5 equiv.), styrene (138  $\mu$ L, 1.2 mmol, 1.0 equiv.), *t*BuONa (173 mg, 1.8 mmol, 1.5 equiv.) and 85 wt% *m*CPBA (730 mg, 3.6 mmol, 3.0 equiv.). Purification by column chromatography on silica gel using petroleum ether and ethyl acetate (5:1 (v/v)) as eluent afforded **5p** as a white solid (432 mg, 81% yield).

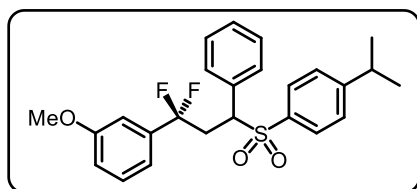

$R_f$  = 0.40 (petroleum ether/ ethyl acetate 5:1 (v/v)).

**NMR Spectroscopy:** <sup>1</sup>H NMR (600 MHz, CDCl<sub>3</sub>)

$\delta$  7.37 (d,  $J$  = 8.2 Hz, 2H), 7.27 (s, 1H), 7.26 – 7.23 (m, 1H), 7.22 – 7.14 (m, 4H), 7.04 (d,  $J$  = 7.5 Hz,

2H), 6.94 – 6.88 (m, 2H), 6.81 (s, 1H), 4.25 (d,  $J$  = 10.5 Hz, 1H), 3.77 (s, 3H), 3.35 – 3.20 (m, 1H), 3.13 – 2.98 (m, 1H), 2.96 – 2.87 (m, 1H), 1.24 – 1.20 (m, 6H). <sup>19</sup>F NMR (565 MHz, CDCl<sub>3</sub>)  $\delta$  -91.98 (ddd,  $J$  = 244.6, 19.9, 8.3 Hz, 1F), -94.96 (ddd,  $J$  = 244.6, 19.2, 14.2 Hz, 1F). <sup>13</sup>C NMR (151 MHz, CDCl<sub>3</sub>)  $\delta$  159.7, 155.7, 137.6 (t,  $J$  = 26.0 Hz), 133.8, 132.1, 130.0, 129.9, 129.3, 128.8, 128.3, 126.9, 121.6 (t,  $J$  = 245.5 Hz), 117.2 (t,  $J$  = 6.2 Hz), 116.0, 110.4 (t,  $J$  = 6.0 Hz), 66.8, 55.5, 37.3 (t,  $J$  = 28.5 Hz), 34.3, 23.7. **HRMS (ESI)** ( $m/z$ ): [M+Na]<sup>+</sup> calcd for C<sub>25</sub>H<sub>26</sub>F<sub>2</sub>O<sub>3</sub>SNa<sup>+</sup>, 467.1463; found 467.1473.

**1-(3-((4-(*tert*-Butyl)phenyl)sulfonyl)-1,1-difluoro-3-phenylpropyl)-3-methoxybenzene (5q)**

General procedure B was used with 4-(*tert*-butyl)benzenethiol (310  $\mu$ L, 1.8 mmol, 1.5 equiv.), 3-(trifluoromethyl)anisole (260  $\mu$ L, 1.8 mmol, 1.5 equiv.), styrene (138  $\mu$ L, 1.2 mmol, 1.0 equiv.), *t*BuONa (173 mg, 1.8 mmol, 1.5 equiv.) and 85 wt% *m*CPBA (730 mg, 3.6 mmol, 3.0 equiv.). Purification by column chromatography on silica gel using petroleum ether and ethyl acetate (5:1 (v/v)) as eluent afforded **5q** as a white solid (352 mg, 64% yield).

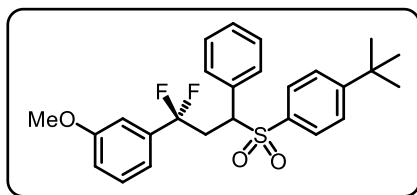

$R_f$  = 0.30 (petroleum ether/ ethyl acetate 5:1 (v/v)).

**NMR Spectroscopy:**  $^1\text{H}$  NMR (600 MHz,  $\text{CDCl}_3$ )

$\delta$  7.40 – 7.33 (m, 4H), 7.28 – 7.26 (m, 1H), 7.26 – 7.23 (m, 1H), 7.20 – 7.15 (m, 2H), 7.04 (d,  $J$  = 7.5

Hz, 2H), 6.93 – 6.88 (m, 2H), 6.82 (s, 1H), 4.25 (d,  $J$  = 10.7 Hz, 1H), 3.77 (s, 3H), 3.38 – 3.20 (m, 1H), 3.11 – 2.97 (m, 1H), 1.29 (s, 9H).  $^{19}\text{F}$  NMR (565 MHz,  $\text{CDCl}_3$ )  $\delta$  - 91.90 (ddd,  $J$  = 244.5, 19.7, 8.5 Hz, 1F), -94.91 (ddd,  $J$  = 244.6, 18.5, 14.5 Hz, 1F).  $^{13}\text{C}$  NMR (151 MHz,  $\text{CDCl}_3$ )  $\delta$  159.7, 157.9, 137.6 (t,  $J$  = 25.8 Hz), 133.5, 132.1, 129.9, 129.9, 129.1, 128.8, 128.3, 125.8, 121.6 (t,  $J$  = 245.5 Hz), 117.2 (t,  $J$  = 6.0 Hz), 116.0, 110.4 (t,  $J$  = 5.0 Hz), 66.8, 55.5, 37.3 (t,  $J$  = 28.4 Hz), 35.3, 31.1. **HRMS (ESI)** ( $m/z$ ):  $[\text{M}+\text{Na}]^+$  calcd for  $\text{C}_{26}\text{H}_{28}\text{F}_2\text{O}_3\text{SNa}^+$ , 481.1619; found 481.1625.

#### 1-(1,1-Difluoro-3-phenyl-3-tosylpropyl)-3-methoxybenzene (**5r**)

General procedure B was used with 4-methylbenzenethiol (223 mg, 1.8 mmol, 1.5 equiv.), 3-(trifluoromethyl)anisole (260  $\mu\text{L}$ , 1.8 mmol, 1.5 equiv.), styrene (138  $\mu\text{L}$ , 1.2 mmol, 1.0 equiv.),  $t\text{BuONa}$  (173 mg, 1.8 mmol, 1.5 equiv.) and 85 wt%  $m\text{CPBA}$  (730 mg, 3.6 mmol, 3.0 equiv.). Purification by column chromatography on silica gel using petroleum ether and ethyl acetate (5:1 (v/v)) as eluent afforded **5r** as a white solid (349 mg, 70% yield).

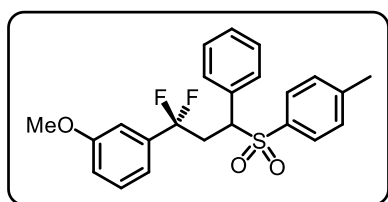

$R_f$  = 0.30 (petroleum ether/ ethyl acetate 5:1 (v/v)).

**NMR Spectroscopy:**  $^1\text{H}$  NMR (600 MHz,  $\text{CDCl}_3$ )  $\delta$

7.33 (d,  $J$  = 8.1 Hz, 2H), 7.28 (s, 1H), 7.25 (s, 1H), 7.22 – 7.17 (m, 2H), 7.15 (d,  $J$  = 8.0 Hz, 2H), 7.06 (d,  $J$  =

7.5 Hz, 2H), 6.91 (d,  $J$  = 8.0 Hz, 2H), 6.81 (s, 1H), 4.24 (d,  $J$  = 11.0 Hz, 1H), 3.77 (s, 3H), 3.38 – 3.21 (m, 1H), 3.11 – 2.94 (m, 1H), 2.38 (s, 3H).  $^{19}\text{F}$  NMR (565 MHz,  $\text{CDCl}_3$ )  $\delta$  -92.10 (ddd,  $J$  = 244.5, 19.9, 8.3 Hz, 1F), -95.00 (ddd,  $J$  = 244.5, 19.0, 14.1 Hz, 1F).  $^{13}\text{C}$  NMR (151 MHz,  $\text{CDCl}_3$ )  $\delta$  159.7, 144.9, 137.5 (t,  $J$  = 26.0 Hz), 133.5, 132.1, 129.9, 129.8, 129.4, 129.1, 128.8, 128.3, 121.5 (t,  $J$  = 245.5 Hz), 117.1 (t,  $J$  = 5.9 Hz), 115.9, 110.4, 66.6, 55.4, 37.4 (t,  $J$  = 28.3 Hz), 21.6. **HRMS (ESI)** ( $m/z$ ):  $[\text{M}+\text{Na}]^+$  calcd for  $\text{C}_{23}\text{H}_{22}\text{F}_2\text{O}_3\text{SNa}^+$ , 439.1150; found 439.1150.



**1-(1,1-Difluoro-3-((3-methoxyphenyl)sulfonyl)-3-phenylpropyl)-3-methoxybenzene (5s)**

General procedure B was used with 3-methoxybenzenethiol (223  $\mu$ L, 1.8 mmol, 1.5 equiv.), 3-(trifluoromethyl)anisole (260  $\mu$ L, 1.8 mmol, 1.5 equiv.), styrene (138  $\mu$ L, 1.2 mmol, 1.0 equiv.), *t*BuONa (173 mg, 1.8 mmol, 1.5 equiv.) and 85 wt% *m*CPBA (730 mg, 3.6 mmol, 3.0 equiv.). Purification by column chromatography on silica gel using petroleum ether and ethyl acetate (5:1 (v/v)) as eluent afforded **5s** as a white solid (358 mg, 69% yield).

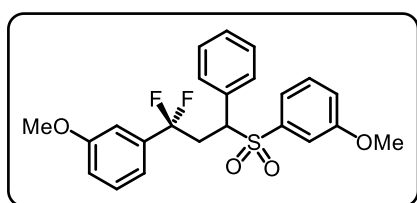

$R_f$  = 0.50 (petroleum ether/ ethyl acetate 5:1 (v/v)).

**NMR Spectroscopy:**  $^1\text{H}$  NMR (600 MHz,  $\text{CDCl}_3$ )

$\delta$  7.31 – 7.26 (m, 3H), 7.24 – 7.18 (m, 2H), 7.14 (d,  $J$  = 7.5 Hz, 1H), 7.11 – 7.03 (m, 3H), 6.92 (d,  $J$  = 7.6

Hz, 2H), 6.82 (s, 2H), 4.27 (d,  $J$  = 11.0 Hz, 1H), 3.77 (s, 3H), 3.63 (s, 3H), 3.40 – 3.22 (m, 1H), 3.17 – 2.94 (m, 1H).  $^{19}\text{F}$  NMR (565 MHz,  $\text{CDCl}_3$ )  $\delta$  -92.11 (ddd,  $J$  = 244.2, 19.8, 8.4 Hz, 1F), -95.02 (ddd,  $J$  = 244.6, 19.0, 14.1 Hz, 1F).  $^{13}\text{C}$  NMR (151 MHz,  $\text{CDCl}_3$ )  $\delta$  159.7, 159.6, 137.5 (t,  $J$  = 26.1 Hz), 132.1, 130.0, 129.9, 128.9, 128.4, 121.5 (t,  $J$  = 245.2 Hz), 121.3, 121.0, 117.2 (t,  $J$  = 5.9 Hz), 116.0, 113.1, 110.4, 66.7, 55.6, 55.4, 37.2 (t,  $J$  = 28.4 Hz). **HRMS (ESI)** ( $m/z$ ):  $[\text{M}+\text{Na}]^+$  calcd for  $\text{C}_{23}\text{H}_{22}\text{F}_2\text{O}_4\text{SNa}^+$ , 455.1099; found 455.1104.

**1-(1,1-Difluoro-3-(4-fluorophenyl)-3-(phenylsulfonyl)propyl)-3-methoxybenzene (5t)**

General procedure B was used with thiophenol (184  $\mu$ L, 1.8 mmol, 1.5 equiv.), 3-(trifluoromethyl)anisole (260  $\mu$ L, 1.8 mmol, 1.5 equiv.), 1-fluoro-4-vinylbenzene (143  $\mu$ L, 1.2 mmol, 1.0 equiv.), *t*BuONa (173 mg, 1.8 mmol, 1.5 equiv.) and 85 wt% *m*CPBA (730 mg, 3.6 mmol, 3.0 equiv.). Purification by column chromatography on silica gel using petroleum ether and ethyl acetate (5:1 (v/v)) as eluent afforded **5t** as a white solid (388 mg, 77% yield).

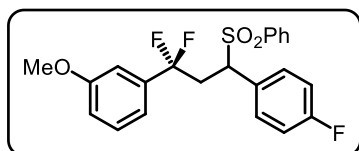

$R_f$  = 0.40 (petroleum ether/ ethyl acetate 5:1 (v/v)). **NMR**

**Spectroscopy:**  $^1\text{H}$  NMR (600 MHz,  $\text{CDCl}_3$ )  $\delta$  7.58 –

7.54 (m, 1H), 7.48 (d,  $J$  = 7.4 Hz, 2H), 7.42 – 7.35 (m, 2H), 7.29 – 7.24 (m, 1H), 7.06 – 6.99 (m, 2H), 6.93 – 6.91 (m, 1H), 6.90 – 6.86 (m, 3H), 6.80 (s, 1H), 4.27 (d,  $J$  = 11.2 Hz, 1H), 3.77 (s, 3H), 3.39 – 3.18 (m, 1H), 3.07 – 2.87 (m, 1H).  $^{19}\text{F}$  NMR (565 MHz,  $\text{CDCl}_3$ )  $\delta$  -92.10 – -92.75 (m 1F), -94.60 (ddd,  $J$  = 244.8, 18.4, 14.0 Hz, 1F), -112.15 – -112.26 (m, 1F).  $^{13}\text{C}$  NMR (151 MHz,  $\text{CDCl}_3$ )  $\delta$  163.0 (d,  $J$  = 257.0 Hz), 159.7, 137.5 (t,  $J$  = 25.8 Hz), 132.6, 132.0 (d,  $J$  = 9.4 Hz), 129.9, 129.9, 129.1, 128.6, 121.5 (t,  $J$  = 245.3 Hz), 117.2 (t,  $J$  = 6.0 Hz), 116.2, 116.1 (d,  $J$  = 5.4 Hz), 110.5 (t,  $J$  = 5.7 Hz), 67.0, 55.5, 37.2 (t,  $J$  = 28.4 Hz). **HRMS (ESI)** (m/z):  $[\text{M}+\text{Na}]^+$  calcd for  $\text{C}_{22}\text{H}_{19}\text{F}_3\text{O}_3\text{SNa}^+$ , 443.0899; found 443.0913.

#### 1-(1,1-Difluoro-3-(phenylsulfonyl)-3-(*p*-tolyl)propyl)-3-methoxybenzene (**5u**)

General procedure B was used with thiophenol (184  $\mu\text{L}$ , 1.8 mmol, 1.5 equiv.), 3-(trifluoromethyl)anisole (260  $\mu\text{L}$ , 1.8 mmol, 1.5 equiv.), 1-methyl-4-vinylbenzene (158  $\mu\text{L}$ , 1.2 mmol, 1.0 equiv.), *t*BuONa (173 mg, 1.8 mmol, 1.5 equiv.) and 85 wt% *m*CPBA (730 mg, 3.6 mmol, 3.0 equiv.). Purification by column chromatography on silica gel using petroleum ether and ethyl acetate (5:1 (v/v)) as eluent afforded **5u** as a white solid (265 mg, 53% yield).

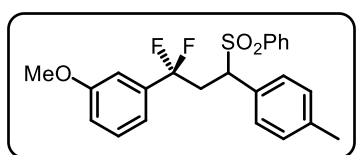

$R_f$  = 0.30 (petroleum ether/ ethyl acetate 5:1 (v/v)). **NMR**

**Spectroscopy:**  $^1\text{H}$  NMR (600 MHz,  $\text{CDCl}_3$ )  $\delta$  7.58 – 7.51

(m, 1H), 7.48 (d,  $J$  = 7.3 Hz, 2H), 7.41 – 7.33 (m, 2H), 7.30 – 7.26 (m, 1H), 7.00 (d,  $J$  = 7.6 Hz, 2H), 6.96 – 6.87 (m, 4H), 6.81 (s, 1H), 4.24 (d,  $J$  = 10.8 Hz, 1H), 3.77 (s, 3H), 3.34 – 3.18 (m, 1H), 3.12 – 2.92 (m, 1H), 2.30 (s, 3H).  $^{19}\text{F}$  NMR (565 MHz,  $\text{CDCl}_3$ )  $\delta$  -91.87 (ddd,  $J$  = 244.3, 19.5, 8.0 Hz, 1F), -95.09 (ddd,  $J$  = 244.5, 18.9, 14.7 Hz, 1F).  $^{13}\text{C}$  NMR (151 MHz,  $\text{CDCl}_3$ )  $\delta$  159.7, 138.9, 137.6 (t,  $J$  = 25.9 Hz), 136.7, 133.8, 129.8, 129.8, 129.2, 129.1, 128.8, 121.6 (t,  $J$  = 245.5 Hz), 117.2 (t,  $J$  = 6.0 Hz), 116.0, 110.4, 66.4, 55.4, 37.3 (t,  $J$  = 28.3 Hz), 21.6. **HRMS (ESI)** (m/z):  $[\text{M}+\text{Na}]^+$  calcd for  $\text{C}_{23}\text{H}_{22}\text{F}_2\text{O}_3\text{SNa}^+$ , 439.1150; found 439.1155.

**1-(1,1-Difluoro-3-(4-isobutylphenyl)-3-(phenylsulfonyl)propyl)-3-methoxybenzene (5v)**

General procedure B was used with thiophenol (184  $\mu$ L, 1.8 mmol, 1.5 equiv.), 3-(trifluoromethyl)anisole (260  $\mu$ L, 1.8 mmol, 1.5 equiv.), 1-methyl-4-vinylbenzene (218  $\mu$ L, 1.2 mmol, 1.0 equiv.), *t*BuONa (173 mg, 1.8 mmol, 1.5 equiv.) and 85 wt% *m*CPBA (730 mg, 3.6 mmol, 3.0 equiv.). Purification by column chromatography on silica gel using petroleum ether and ethyl acetate (5:1 (v/v)) as eluent afforded **5v** as a white solid (440 mg, 80% yield).

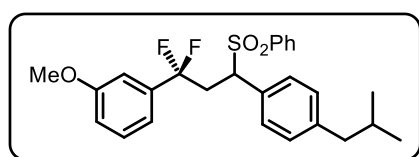

$R_f$  = 0.50 (petroleum ether/ ethyl acetate 5:1 (v/v)).

**NMR Spectroscopy:**  $^1\text{H}$  NMR (600 MHz,  $\text{CDCl}_3$ )

$\delta$  7.56 – 7.49 (m, 1H), 7.44 (d,  $J$  = 7.6 Hz, 2H), 7.36 – 7.29 (m, 2H), 7.28 – 7.23 (m, 1H), 6.98 – 6.88 (m, 6H), 6.83 (s, 1H), 4.25 (d,  $J$  = 10.9 Hz, 1H), 3.77 (s, 3H), 3.40 – 3.21 (m, 1H), 3.13 – 2.95 (m, 1H), 2.41 (d,  $J$  = 6.2 Hz, 2H), 1.88 – 1.71 (m, 1H),  $\delta$  0.87 (d,  $J$  = 6.5 Hz, 1H), 0.86 (d,  $J$  = 6.5 Hz, 1H).  $^{19}\text{F}$  NMR (565 MHz,  $\text{CDCl}_3$ )  $\delta$  -92.48 (ddd,  $J$  = 244.3, 19.7, 9.0 Hz, 1F), -94.07 – -94.84 (m, 1F).  $^{13}\text{C}$  NMR (151 MHz,  $\text{CDCl}_3$ )  $\delta$  159.8, 142.7, 137.7 (t,  $J$  = 26.1 Hz), 136.8, 133.7, 129.9, 129.7, 129.3, 129.3, 129.2, 128.7, 121.6 (t,  $J$  = 245.7 Hz), 117.3 (t,  $J$  = 5.9 Hz), 116.1, 110.5 (t,  $J$  = 6.3 Hz), 66.7, 55.5, 45.1, 37.2 (t,  $J$  = 28.7 Hz), 30.3, 22.4, 22.4. **HRMS (ESI)** ( $m/z$ ):  $[\text{M}+\text{Na}]^+$  calcd for  $\text{C}_{26}\text{H}_{28}\text{F}_2\text{O}_3\text{SNa}^+$ , 481.1619; found 481.1624.

**1-(3-(4-(*tert*-Butyl)phenyl)-1,1-difluoro-3-(phenylsulfonyl)propyl)-3-methoxybenzene (5w)**

General procedure B was used with thiophenol (184  $\mu$ L, 1.8 mmol, 1.5 equiv.), 3-(trifluoromethyl)anisole (260  $\mu$ L, 1.8 mmol, 1.5 equiv.), 1-(*tert*-butyl)-4-vinylbenzene (220  $\mu$ L, 1.2 mmol, 1.0 equiv.), *t*BuONa (173 mg, 1.8 mmol, 1.5 equiv.) and 85 wt% *m*CPBA (730 mg, 3.6 mmol, 3.0 equiv.). Purification by column chromatography on silica gel using petroleum ether and ethyl acetate (5:1 (v/v)) as eluent afforded **5w** as a white solid (407 mg, 74% yield).

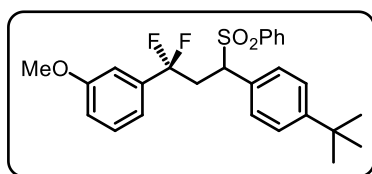

$R_f = 0.30$  (petroleum ether/ ethyl acetate 5:1 (v/v)).

**NMR Spectroscopy:**  $^1\text{H}$  NMR (600 MHz,  $\text{CDCl}_3$ )  $\delta$

7.40 – 7.33 (m, 4H), 7.28 – 7.26 (m, 1H), 7.25 – 7.23 (m, 1H), 7.19 – 7.14 (m, 2H), 7.04 (d,  $J = 7.5$  Hz, 2H), 6.93 – 6.88 (m, 2H), 6.82 (s, 1H), 4.25 (d,  $J = 10.7$  Hz, 1H), 3.77 (s, 3H), 3.37 – 3.19 (m, 1H), 3.14 – 2.96 (m, 1H), 1.29 (s, 9H).  $^{19}\text{F}$  NMR (565 MHz,  $\text{CDCl}_3$ )  $\delta$  -91.90 (ddd,  $J = 244.5, 19.7, 8.5$  Hz, 1F), -94.91 (ddd,  $J = 244.6, 18.5, 14.5$  Hz, 1F).  $^{13}\text{C}$  NMR (151 MHz,  $\text{CDCl}_3$ )  $\delta$  159.7, 157.9, 137.6 (t,  $J = 25.8$  Hz), 133.5, 132.1, 129.9, 129.9, 129.1, 128.8, 128.3, 125.8, 121.6 (t,  $J = 245.5$  Hz), 117.2 (t,  $J = 6.0$  Hz), 116.0, 110.4 (t,  $J = 5.0$  Hz), 66.8, 55.5, 37.3 (t,  $J = 28.4$  Hz), 35.3, 31.1. **HRMS (ESI)** (m/z):  $[\text{M}+\text{Na}]^+$  calcd for  $\text{C}_{26}\text{H}_{28}\text{F}_2\text{O}_3\text{SNa}^+$ , 481.1619; found 481.1624.

### 1-(1,1-Difluoro-3-(4-phenoxyphenyl)-3-(phenylsulfonyl)propyl)-3-methoxybenzene (**5x**)

General procedure B was used with thiophenol (184  $\mu\text{L}$ , 1.8 mmol, 1.5 equiv.), 3-(trifluoromethyl)anisole (260  $\mu\text{L}$ , 1.8 mmol, 1.5 equiv.), 1-phenoxy-4-vinylbenzene (235 mg, 1.2 mmol, 1.0 equiv.), *t*BuONa (173 mg, 1.8 mmol, 1.5 equiv.) and 85 wt% *m*CPBA (730 mg, 3.6 mmol, 3.0 equiv.). Purification by column chromatography on silica gel using petroleum ether and ethyl acetate (5:1 (v/v)) as eluent afforded **5x** as a white solid (480 mg, 81% yield).

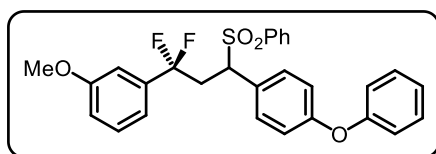

$R_f = 0.30$  (petroleum ether/ ethyl acetate 5:1 (v/v)).

**NMR Spectroscopy:**  $^1\text{H}$  NMR (600 MHz,  $\text{CDCl}_3$ )  $\delta$

7.60 – 7.54 (m, 1H), 7.52 (d,  $J = 7.3$  Hz, 2H), 7.44 – 7.38 (m, 2H), 7.38 – 7.33 (m, 2H), 7.29 – 7.26 (m, 1H), 7.17 – 7.10 (m, 1H), 7.01 – 6.94 (m, 4H), 6.94 – 6.89 (m, 2H), 6.83 – 6.77 (m, 3H), 4.26 (d,  $J = 9.7$  Hz, 1H), 3.78 (s, 3H), 3.36 – 3.21 (m, 1H), 3.10 – 2.92 (m, 1H).  $^{19}\text{F}$  NMR (565 MHz,  $\text{CDCl}_3$ )  $\delta$  -92.90 (ddd,  $J = 244.9, 19.2, 10.2$  Hz, 1F), -93.93 (ddd,  $J = 244.9, 17.4, 14.3$  Hz, 1F).  $^{13}\text{C}$  NMR (151 MHz,  $\text{CDCl}_3$ )  $\delta$  159.8, 158.0, 156.8, 137.6 (t,  $J = 25.9$  Hz), 136.8, 133.9, 131.4, 130.0, 129.9, 129.3, 128.9, 126.4, 123.9, 121.6 (t,  $J = 245.7$  Hz), 119.3, 118.5,

117.3 (t,  $J = 6.2$  Hz), 116.1, 110.5 (t,  $J = 6.2$  Hz), 66.2, 55.5, 37.4 (t,  $J = 28.6$  Hz).

**HRMS (ESI)** ( $m/z$ ):  $[M+Na]^+$  calcd for  $C_{28}H_{24}F_2O_4SNa^+$ , 517.1256; found 517.1266.

**1-(1,1-Difluoro-3-(4-methoxyphenyl)-3-(phenylsulfonyl)propyl)-3-methoxybenzene (5y)**

General procedure B was used with thiophenol (184  $\mu$ L, 1.8 mmol, 1.5 equiv.), 3-(trifluoromethyl)anisole (260  $\mu$ L, 1.8 mmol, 1.5 equiv.), 1-methoxy-4-vinylbenzene (160  $\mu$ L, 1.2 mmol, 1.0 equiv.), *t*BuONa (173 mg, 1.8 mmol, 1.5 equiv.) and *m*CPBA (730 mg, 3.6 mmol, 3.0 equiv.). Purification by column chromatography on silica gel using petroleum ether and ethyl acetate (5:1 (v/v)) as eluent afforded **5y** as a white solid (493 mg, 95% yield).

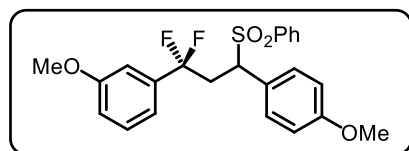

$R_f = 0.30$  (petroleum ether/ ethyl acetate 4:1 (v/v)).

**NMR Spectroscopy:**  $^1H$  NMR (600 MHz,  $CDCl_3$ )  $\delta$  7.62 – 7.51 (m, 1H), 7.48 (d,  $J = 7.7$  Hz, 2H), 7.43 –

7.35 (m, 2H), 7.28 (s, 1H), 6.96 (d,  $J = 8.4$  Hz, 2H), 6.93 – 6.87 (m, 2H), 6.80 (s, 1H), 6.72 (d,  $J = 8.5$  Hz, 2H), 4.22 (d,  $J = 11.0$  Hz, 1H), 3.78 (s, 3H), 3.78 (s, 3H), 3.38 – 3.16 (m, 1H), 3.06 – 2.88 (m, 1H).  $^{19}F$  NMR (565 MHz,  $CDCl_3$ )  $\delta$  -92.03 (ddd,  $J = 244.3, 19.6, 8.2$  Hz, 1F), -94.98 (ddd,  $J = 244.2, 18.7, 14.5$  Hz, 1F).  $^{13}C$  NMR (151 MHz,  $CDCl_3$ )  $\delta$  160.1, 159.8, 137.7 (t,  $J = 25.6$  Hz), 136.8, 133.8, 131.1, 129.9, 129.3, 128.9, 123.7, 121.6 (t,  $J = 245.8$  Hz), 117.3 (t,  $J = 5.9$  Hz), 116.0, 113.9, 110.5 (t,  $J = 6.3$  Hz), 66.1, 55.5, 55.4, 37.3 (t,  $J = 28.1$  Hz). **HRMS (ESI)** ( $m/z$ ):  $[M+Na]^+$  calcd for  $C_{23}H_{22}F_2O_4SNa^+$ , 455.1099; found 455.1106.

**N-(4-(3,3-Difluoro-3-(3-methoxyphenyl)-1-(phenylsulfonyl)propyl)phenyl)acetamide (5z)**

General procedure B was used with thiophenol (184  $\mu$ L, 1.8 mmol, 1.5 equiv.), 3-(trifluoromethyl)anisole (260  $\mu$ L, 1.8 mmol, 1.5 equiv.), N-(4-vinylphenyl)acetamide (193 mg, 1.2 mmol, 1.0 equiv.), *t*BuONa (173 mg, 1.8 mmol, 1.5 equiv.) and 85 wt% *m*CPBA (730 mg, 3.6 mmol, 3.0 equiv.). Purification by column chromatography on silica gel using petroleum ether and ethyl acetate (1:1 (v/v)) as eluent afforded **5z** as a

yellow solid (331 mg, 60% yield).

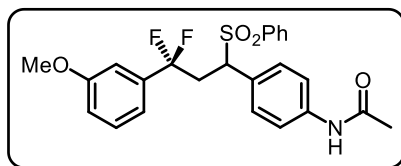

$R_f = 0.30$  (petroleum ether/ ethyl acetate 1:1 (v/v)).

**NMR Spectroscopy:**  $^1\text{H}$  NMR (600 MHz,  $\text{CDCl}_3$ )  $\delta$

7.87 (s, 1H), 7.57 – 7.51 (m, 1H), 7.49 (d,  $J = 7.6$  Hz, 2H), 7.41 – 7.33 (m, 4H), 7.24 (d,  $J = 7.9$  Hz, 1H), 6.99 (d,  $J = 8.0$  Hz, 2H), 6.90 (d,  $J = 8.0$  Hz, 1H), 6.86 (d,  $J = 7.5$  Hz, 1H), 6.78 (s, 1H), 4.25 (d,  $J = 10.9$  Hz, 1H), 3.74 (s, 3H), 3.29 – 3.12 (m, 1H), 3.06 – 2.89 (m, 1H), 2.10 (s, 3H).  $^{19}\text{F}$  NMR (565 MHz,  $\text{CDCl}_3$ )  $\delta$  -91.56 (ddd,  $J = 244.3, 19.5, 7.4$  Hz, 1F), -95.01 – -95.77 (m, 1F).  $^{13}\text{C}$  NMR (126 MHz,  $\text{CDCl}_3$ )  $\delta$  168.9, 159.7, 139.0, 137.3 (t,  $J = 25.8$  Hz), 136.4, 134.1, 130.5, 129.9, 129.0, 128.9, 126.8, 121.4 (t,  $J = 245.5$  Hz), 119.3, 117.0 (t,  $J = 6.0$  Hz), 115.9, 110.4 (t,  $J = 6.3$  Hz), 66.1, 55.4, 37.4 (t,  $J = 28.4$  Hz), 24.6, 14.3. **HRMS (ESI)** ( $m/z$ ):  $[\text{M}+\text{Na}]^+$  calcd for  $\text{C}_{24}\text{H}_{23}\text{F}_2\text{NO}_4\text{SNa}^+$ , 482.1208; found 482.1215.

### 1-(3,3-Difluoro-3-(3-methoxyphenyl)-1-(phenylsulfonyl)propyl)-3,5-dimethoxybenzene (**5aa**)

General procedure B was used with thiophenol (184  $\mu\text{L}$ , 1.8 mmol, 1.5 equiv.), 3-(trifluoromethyl)anisole (260  $\mu\text{L}$ , 1.8 mmol, 1.5 equiv.), 1,3-dimethoxy-5-vinylbenzene (196  $\mu\text{L}$ , 1.2 mmol, 1.0 equiv.),  $t\text{BuONa}$  (173 mg, 1.8 mmol, 1.5 equiv.) and 85 wt%  $m\text{CPBA}$  (730 mg, 3.6 mmol, 3.0 equiv.). Purification by column chromatography on silica gel using petroleum ether and ethyl acetate (4:1 (v/v)) as eluent afforded **5aa** as a white solid (460 mg, 83% yield).

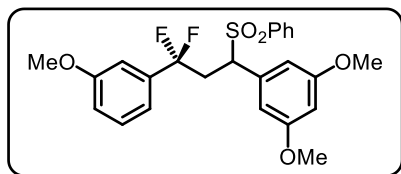

$R_f = 0.20$  (petroleum ether/ ethyl acetate 4:1 (v/v)).

**NMR Spectroscopy:**  $^1\text{H}$  NMR (600 MHz,  $\text{CDCl}_3$ )  $\delta$

7.63 – 7.48 (m, 3H), 7.44 – 7.35 (m, 2H), 7.26 – 7.24 (m, 1H), 6.97 – 6.87 (m, 2H), 6.82 (s, 1H), 6.32 (s, 1H), 6.16 (s, 2H), 4.19 (d,  $J = 10.9$  Hz, 1H), 3.77 (s, 3H), 3.65 (s, 6H), 3.36 – 3.16 (m, 1H), 3.08 – 2.90 (m, 1H).  $^{19}\text{F}$  NMR (565 MHz,  $\text{CDCl}_3$ )  $\delta$  -93.23 (ddd,  $J = 244.6, 19.4, 9.9$  Hz, 1F), -94.17 (ddd,  $J = 244.6, 18.2, 13.8$  Hz, 1F).  $^{13}\text{C}$  NMR (151 MHz,  $\text{CDCl}_3$ )  $\delta$  160.5, 159.7, 137.5 (t,  $J = 25.6$  Hz), 136.6, 134.0, 133.9, 129.8, 129.2, 128.8, 121.5 (t,  $J = 245.5$  Hz), 117.2 (t,  $J = 5.9$  Hz),

116.0, 110.5 (t,  $J = 5.3$  Hz), 108.0, 101.2, 66.8, 55.4, 37.4 (t,  $J = 28.6$  Hz), 14.3. **HRMS** (ESI) (m/z):  $[M+Na]^+$  calcd for  $C_{24}H_{24}F_2O_5SNa^+$ , 485.1205; found 485.1205.

**5-(3,3-Difluoro-3-(3-methoxyphenyl)-1-(phenylsulfonyl)propyl)benzo[d][1,3]dioxole (5ab)**

General procedure B was used with thiophenol (184  $\mu$ L, 1.8 mmol, 1.5 equiv.), 3-(trifluoromethyl)anisole (260  $\mu$ L, 1.8 mmol, 1.5 equiv.), 5-vinylbenzo[d][1,3]dioxole (152  $\mu$ L, 1.2 mmol, 1.0 equiv.), *t*BuONa (173 mg, 1.8 mmol, 1.5 equiv.) and 85 wt% *m*CPBA (730 mg, 3.6 mmol, 3.0 equiv.). Purification by column chromatography on silica gel using petroleum ether and ethyl acetate (4:1 (v/v)) as eluent afforded **5ab** as a yellow oil (375 mg, 70% yield).

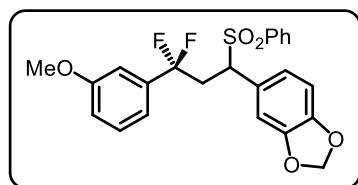

$R_f = 0.30$  (petroleum ether/ ethyl acetate 5:1 (v/v)).

**NMR Spectroscopy:**  $^1H$  NMR (600 MHz,  $CDCl_3$ )  $\delta$  7.60 – 7.50 (m, 3H), 7.45 – 7.37 (m, 2H), 7.29 – 7.27 (m, 1H), 6.96 – 6.87 (m, 2H), 6.81 (s, 1H), 6.66 (s, 1H), 6.58 (d,  $J = 8.0$  Hz, 1H), 6.41 (d,  $J = 7.8$  Hz, 1H), 5.94 (d,  $J = 14.1$  Hz, 2H), 4.19 (d,  $J = 10.2$  Hz, 1H), 3.78 (s, 3H), 3.30 – 3.15 (m, 1H), 2.99 – 2.86 (m, 1H).  $^{19}F$  NMR (565 MHz,  $CDCl_3$ )  $\delta$  -92.56 (ddd,  $J = 244.5, 19.5, 8.9$  Hz, 1F), -94.80 (ddd,  $J = 244.7, 18.3, 14.2$  Hz, 1F).  $^{13}C$  NMR (151 MHz,  $CDCl_3$ )  $\delta$  159.7, 148.2, 147.8, 137.5 (t,  $J = 25.7$  Hz), 136.7, 133.9, 129.9, 129.2, 128.9, 125.4, 124.3, 121.5 (t,  $J = 245.9$  Hz), 117.2 (t,  $J = 6.0$  Hz), 116.0, 110.5, 109.66, 108.1, 101.5, 66.4, 55.5, 37.5 (t,  $J = 28.2$  Hz). **HRMS** (ESI) (m/z):  $[M+Na]^+$  calcd for  $C_{23}H_{20}F_2O_5SNa^+$ , 469.0892; found 469.0901.

**1-(4-(3,3-Difluoro-3-(3-methoxyphenyl)-1-(phenylsulfonyl)propyl)phenyl)-1H-pyrazole (5ac)**

General procedure B was used with thiophenol (184  $\mu$ L, 1.8 mmol, 1.5 equiv.), 3-(trifluoromethyl)anisole (260  $\mu$ L, 1.8 mmol, 1.5 equiv.), 1-(4-vinylphenyl)-1H-pyrazole (204 mg, 1.2 mmol, 1.0 equiv.), *t*BuONa (173 mg, 1.8 mmol, 1.5 equiv.) and 85 wt% *m*CPBA (730 mg, 3.6 mmol, 3.0 equiv.). Purification by column chromatography on silica gel using petroleum ether and ethyl acetate (4:1 (v/v)) as

eluent afforded **5ac** as a yellow oil (410 mg, 73% yield).

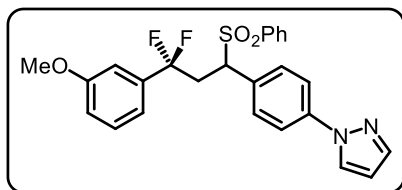

$R_f$  = 0.20 (petroleum ether/ ethyl acetate 4:1 (v/v)).

**NMR Spectroscopy:**  $^1\text{H}$  NMR (600 MHz,  $\text{CDCl}_3$ )  $\delta$

7.93 – 7.88 (m, 1H), 7.72 (s, 1H), 7.58 – 7.50 (m, 5H),  
7.42 – 7.34 (m, 2H), 7.30 – 7.26 (m, 1H), 7.14 (d,  $J$

= 8.3 Hz, 2H), 6.91 (d,  $J$  = 8.0 Hz, 2H), 6.82 (s, 1H), 6.48 (s, 1H), 4.31 (d,  $J$  = 11.0 Hz, 1H), 3.76 (s, 3H), 3.44 – 3.25 (m, 1H), 3.11 – 2.95 (m, 1H).  $^{19}\text{F}$  NMR (565 MHz,  $\text{CDCl}_3$ )  $\delta$  -92.07 (ddd,  $J$  = 244.7, 19.7, 7.8 Hz, 1F), -94.97 (ddd,  $J$  = 244.7, 18.1, 14.3 Hz, 1F).  $^{13}\text{C}$  NMR (151 MHz,  $\text{CDCl}_3$ )  $\delta$  159.8, 141.6, 140.5, 137.5 (t,  $J$  = 25.9 Hz), 136.5, 134.1, 131.0, 130.1, 130.0, 129.2, 129.0, 126.8, 121.5 (t,  $J$  = 245.7 Hz), 118.8, 117.2 (t,  $J$  = 6.0 Hz), 116.0, 110.5 (t,  $J$  = 6.1 Hz), 108.2, 66.2, 55.5, 37.4 (t,  $J$  = 28.4 Hz). **HRMS (ESI)** ( $m/z$ ):  $[\text{M}+\text{Na}]^+$  calcd for  $\text{C}_{25}\text{H}_{22}\text{F}_2\text{N}_2\text{O}_3\text{SNa}^+$ , 491.1211; found 491.1223.

### 1-(4-(3,3-Difluoro-3-(3-methoxyphenyl)-1-(phenylsulfonyl)propyl)phenyl)cyclohexan-1-ol (**5ad**)

General procedure B was used with thiophenol (184  $\mu\text{L}$ , 1.8 mmol, 1.5 equiv.), 3-(trifluoromethyl)anisole (260  $\mu\text{L}$ , 1.8 mmol, 1.5 equiv.), 1-(4-vinylphenyl)cyclohexan-1-ol (243 mg, 1.2 mmol, 1.0 equiv.),  $t\text{BuONa}$  (173 mg, 1.8 mmol, 1.5 equiv.) and 85 wt%  $m\text{CPBA}$  (730 mg, 3.6 mmol, 3.0 equiv.). Purification by column chromatography on silica gel using petroleum ether and ethyl acetate (4:1 (v/v)) as eluent afforded **5ad** as a yellow oil (450 mg, 75% yield).

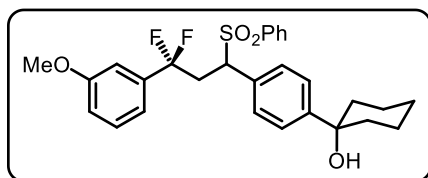

$R_f$  = 0.20 (petroleum ether/ ethyl acetate 4:1 (v/v)).

**NMR Spectroscopy:**  $^1\text{H}$  NMR (600 MHz,  $\text{CDCl}_3$ )

$^1\text{H}$  NMR (600 MHz,  $\text{CDCl}_3$ )  $\delta$  7.55 – 7.50 (m, 1H),  
7.45 (d,  $J$  = 7.6 Hz, 2H), 7.36 – 7.30 (m, 2H), 7.28

(d,  $J$  = 8.2 Hz, 2H), 7.25 – 7.21 (m, 1H), 6.99 (d,  $J$  = 8.1 Hz, 2H), 6.93 – 6.85 (m, 2H), 6.76 (s, 1H), 4.27 (d,  $J$  = 10.5 Hz, 1H), 3.74 (s, 3H), 3.33 – 3.18 (m, 1H), 3.11 – 2.95 (m, 1H), 1.78 – 1.68 (m, 7H), 1.66 (s, 1H), 1.62 (s, 2H), 1.28 (s, 1H).  $^{19}\text{F}$  NMR (565 MHz,  $\text{CDCl}_3$ )  $\delta$  -93.16 (ddd,  $J$  = 244.8, 17.7, 12.0 Hz, 1F), -93.44 – -93.99 (m, 1F).  $^{13}\text{C}$



**NMR** (151 MHz, CDCl<sub>3</sub>)  $\delta$  159.6, 150.3, 137.5 (t,  $J$  = 25.9 Hz), 136.6, 133.8, 130.0, 129.8, 129.7, 129.13, 128.7, 124.7, 121.5 (t,  $J$  = 245.5 Hz), 117.2 (t,  $J$  = 6.0 Hz), 116.0, 110.4, 73.0, 66.4, 55.4, 38.9, 38.8, 37.3 (t,  $J$  = 28.7 Hz), 25.5, 22.2. **HRMS (ESI)** ( $m/z$ ): [M+Na]<sup>+</sup> calcd for C<sub>28</sub>H<sub>30</sub>F<sub>2</sub>O<sub>4</sub>SN<sup>+</sup>, 523.1725; found 523.1729.

### 1-(1,1-Difluoro-2-methyl-3-phenyl-3-(phenylsulfonyl)propyl)-3-methoxybenzene (5ae)

General procedure B was used with thiophenol (184  $\mu$ L, 1.8 mmol, 1.5 equiv.), 3-(trifluoromethyl)anisole (260  $\mu$ L, 1.8 mmol, 1.5 equiv.), (*E*)-prop-1-en-1-ylbenzene (156  $\mu$ L, 1.2 mmol, 1.0 equiv.) and *t*BuONa (173 mg, 1.8 mmol, 1.5 equiv.) and 85 wt% *m*CPBA (730 mg, 3.6 mmol, 3.0 equiv.). Purification by column chromatography on silica gel using petroleum ether and ethyl acetate (4:1 (v/v)) as eluent afforded **5ae** with 1:1 d.r.<sup>1</sup> as a white solid (305 mg, 61% yield).

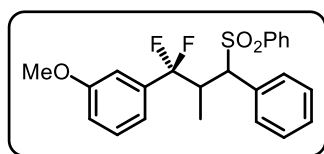

**One of mixed isomers of 5ae**  $R_f$  = 0.40 (petroleum ether/ethyl acetate 5:1 (v/v)). **<sup>1</sup>H NMR** (600 MHz, CDCl<sub>3</sub>)  $\delta$  7.42 – 7.34 (m, 3H), 7.25 – 7.19 (m, 3H), 7.13 – 7.08 (m, 1H), 7.08 – 6.94 (m, 4H), 6.89 (d,  $J$  = 8.0 Hz, 2H), 6.78 (s, 1H), 4.32 (d,  $J$  = 8.7 Hz, 1H), 3.77 (s, 3H), 3.52 – 3.35 (m, 1H), 1.65 (d,  $J$  = 7.1 Hz, 3H). **<sup>19</sup>F NMR** (565 MHz, CDCl<sub>3</sub>)  $\delta$  -91.22 (dd,  $J$  = 243.6, 7.3 Hz, 1F), -104.11 (dd,  $J$  = 243.5, 18.0 Hz, 1F). **<sup>13</sup>C NMR** (151 MHz, CDCl<sub>3</sub>)  $\delta$  159.6, 139.1, 137.3 (t,  $J$  = 25.3 Hz), 134.9, 133.1, 130.1, 129.6, 128.8, 128.4, 128.3, 123.4 (t,  $J$  = 247.7 Hz), 117.9 (t,  $J$  = 6.3 Hz), 115.6, 111.4 (t,  $J$  = 6.5 Hz), 71.6, 55.5, 44.7 (t,  $J$  = 25.1 Hz), 13.5. **HRMS (ESI)** ( $m/z$ ): [M+Na]<sup>+</sup> calcd for C<sub>23</sub>H<sub>22</sub>F<sub>2</sub>O<sub>3</sub>SN<sup>+</sup>, 439.1150; found 439.1148.

### Compound (5af)

General procedure B was used with thiophenol (1.8 mmol, 184  $\mu$ L, 1.5 equiv.), **2o** (753 mg, 1.8 mmol, 1.5 equiv.), styrene (138  $\mu$ L, 1.2 mmol, 1.0 equiv.), *t*BuONa (173 mg, 1.8 mmol, 1.5 equiv.) and 85 wt% *m*CPBA (730 mg, 3.6 mmol, 3.0 equiv.). Purification

<sup>1</sup> The diastereomeric ratio determined by <sup>19</sup>F NMR.

by column chromatography on silica gel using petroleum ether and ethyl acetate (5:1 (v/v)) as eluent afforded **5af** with 1:1 d.r. as a colorless oil (271 mg, 35% yield).

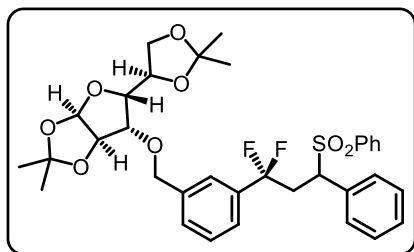

The mixed isomers of **5af**  $R_f$  = 0.20 (petroleum ether/ ethyl acetate 5:1 (v/v)). **NMR Spectroscopy:**

**$^1\text{H}$  NMR** (600 MHz,  $\text{CDCl}_3$ )  $\delta$  7.59 – 7.53 (m, 1H), 7.48 (d,  $J$  = 7.7 Hz, 2H), 7.41 (d,  $J$  = 7.4 Hz, 1H), 7.40 – 7.34 (m, 3H), 7.32 (s, 1H), 7.29 (s, 1H), 7.26

(d,  $J$  = 7.3 Hz, 1H), 7.22 – 7.16 (m, 2H), 7.05 (d,  $J$  = 7.5 Hz, 2H), 5.92 (d,  $J$  = 3.5 Hz, 1H), 4.68 (d,  $J$  = 12.0 Hz, 1H), 4.64 (s, 1H), 4.62 (s, 1H), 4.40 – 4.34 (m, 1H), 4.31 (dd,  $J$  = 10.6, 4.9 Hz, 1H), 4.22 – 4.08 (m, 2H), 4.08 – 3.95 (m, 2H), 3.44 – 3.25 (m, 1H), 3.16 – 2.96 (m, 1H), 1.52 (s, 3H), 1.45 (s, 3H), 1.37 (d,  $J$  = 3.5 Hz, 3H), 1.35 (s, 3H).  **$^{19}\text{F}$  NMR**  $\delta$  -92.46 – -93.50 (m, 1F), -94.01 – -94.96 (m, 1F).  **$^{13}\text{C}$  NMR** (151 MHz,  $\text{CDCl}_3$ )  $\delta$  138.5, 136.7, 133.9, 132.2, 129.9, 129.4, 129.2, 129.0, 128.8, 128.5, 124.5 (t,  $J$  = 5.6 Hz), 124.1 (q,  $J$  = 6.1 Hz), 121.6 (t,  $J$  = 245.2 Hz), 112.0, 109.3 (d,  $J$  = 3.9 Hz), 105.5, 82.8, 82.2, 81.5, 72.5, 72.0, 67.7, 66.8, 37.3 (t,  $J$  = 26.7 Hz), 27.0, 26.4, 25.5. **HRMS (ESI)** ( $m/z$ ):  $[\text{M}+\text{Na}]^+$  calcd for  $\text{C}_{34}\text{H}_{38}\text{F}_2\text{O}_8\text{SNa}^+$ , 667.2148; found 667.2156.

### Compound (**5ag**)

General procedure B was used with thiophenol (184  $\mu\text{L}$ , 1.8 mmol, 1.5 equiv.), 3-(trifluoromethyl)anisole (260  $\mu\text{L}$ , 1.8 mmol, 1.5 equiv.), **1n** (336 mg, 1.2 mmol, 1.0 equiv.),  $t\text{BuONa}$  (173 mg, 1.8 mmol, 1.5 equiv.) and 85 wt%  $m\text{CPBA}$  (730 mg, 3.6 mmol, 3.0 equiv.). Purification by column chromatography on silica gel using petroleum ether and ethyl acetate (3:1 (v/v)) as eluent afforded **5ag** with 1:1 d.r. as a white solid (604 mg, 87% yield).

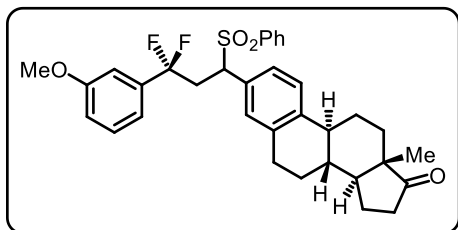

The mixed isomers of **5ag**  $R_f$  = 0.30 (petroleum ether/ ethyl acetate 3:1 (v/v)). **NMR Spectroscopy:**

**$^1\text{H}$  NMR** (600 MHz,  $\text{CDCl}_3$ )  $\delta$  7.60 – 7.50 (m, 3H), 7.43 – 7.36 (m, 2H), 7.25 –

7.22 (m, 1H), 7.13 – 7.05 (m, 1H), 6.91 – 6.85 (m, 2H), 6.85 – 6.68 (m, 3H), 4.21 (d,  $J$  = 10.8 Hz, 1H), 3.75 (s, 3H), 3.24 – 3.09 (m, 1H), 3.06 – 2.91 (m, 1H), 2.81 – 2.73 (m,

1H), 2.73 – 2.63 (m, 1H), 2.51 (dd,  $J = 19.0, 8.7$  Hz, 1H), 2.39 – 2.31 (m, 1H), 2.24 (t,  $J = 8.2$  Hz, 1H), 2.20 – 2.10 (m, 1H), 2.09 – 2.02 (m, 1H), 2.01 – 1.91 (m, 2H), 1.67 – 1.58 (m, 1H), 1.58 – 1.44 (m, 4H), 1.44 – 1.32 (m, 1H), 0.93 (s, 1.5H), 0.92 (s, 1.5H).  **$^{19}\text{F}$  NMR** (565 MHz,  $\text{CDCl}_3$ )  $\delta$  -92.64 – -93.39 (m, 1F), -93.43 – -94.28 (m, 1F).  **$^{13}\text{C}$  NMR** (151 MHz,  $\text{CDCl}_3$ )  $\delta$  159.7, 140.7, 140.6, 137.6 (t,  $J = 25.2$  Hz), 136.9, 136.6, 136.5, 133.8, 130.7, 130.5, 130.3, 129.7, 129.3, 128.8, 127.4, 127.2, 125.4, 125.3, 121.5 (t,  $J = 249.4$  Hz), 117.2 (t,  $J = 5.5$  Hz), 116.0, 116.0, 110.3 (t,  $J = 10.0$  Hz), 66.4, 55.4, 50.7, 48.0, 44.5, 44.4, 38.1, 38.1, 37.6 (t,  $J = 28.4$  Hz), 37.5 (t,  $J = 28.8$  Hz), 35.9, 35.3, 31.7, 29.2, 26.5, 25.7, 21.7, 21.7, 14.0. **HRMS (ESI)** ( $m/z$ ):  $[\text{M}+\text{Na}]^+$  calcd for  $\text{C}_{34}\text{H}_{36}\text{F}_2\text{O}_4\text{SNa}^+$ , 601.2195; found 601.2209.

### Compound (5ah)

General procedure B was used with thiophenol (184  $\mu\text{L}$ , 1.8 mmol, 1.5 equiv.), 3-(trifluoromethyl)anisole (260  $\mu\text{L}$ , 1.8 mmol, 1.5 equiv.), **1o** (370 mg, 1.2 mmol, 1.0 equiv.), *t*BuONa (173 mg, 1.8 mmol, 1.5 equiv.) and 85 wt% *m*CPBA (730 mg, 3.6 mmol, 3.0 equiv.). Purification by column chromatography on silica gel using petroleum ether and ethyl acetate (5:1 (v/v)) as eluent afforded **5ah** with 1:1 d.r. as a yellow oil (240 mg, 33% yield).

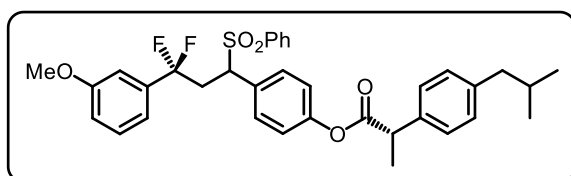

**The mixed isomers of 5ah**  $R_f = 0.50$  (petroleum ether/ ethyl acetate 5:1 (v/v)). **NMR Spectroscopy:**  **$^1\text{H}$  NMR**

(600 MHz,  $\text{CDCl}_3$ )  $\delta$  7.57 – 7.50 (m, 1H), 7.45 (d,  $J = 7.4$  Hz, 2H), 7.40 – 7.33 (m, 2H), 7.30 – 7.27 (m, 2H), 7.24 (s, 1H), 7.15 (d,  $J = 7.1$  Hz, 2H), 7.01 (d,  $J = 7.7$  Hz, 2H), 6.94 – 6.87 (m, 2H), 6.84 (d,  $J = 7.7$  Hz, 2H), 6.81 (s, 1H), 4.25 (d,  $J = 11.0$  Hz, 1H), 3.98 – 3.85 (m, 1H), 3.76 (s, 3H), 3.40 – 3.21 (m, 1H), 3.07 – 2.87 (m, 1H), 2.48 (d,  $J = 6.8$  Hz, 2H), 1.92 – 1.80 (m, 1H), 1.60 (d,  $J = 6.6$  Hz, 3H), 0.92 (d,  $J = 5.9$  Hz, 6H).  **$^{19}\text{F}$  NMR** (565 MHz,  $\text{CDCl}_3$ )  $\delta$  -91.94 – -92.72 (m, 1F), -94.60 – -95.40 (m, 1F).  **$^{13}\text{C}$  NMR** (151 MHz,  $\text{CDCl}_3$ )  $\delta$  172.9, 159.8, 151.4, 141.1, 137.5 (t,  $J = 26.1$  Hz), 137.2, 136.4, 134.0, 130.8, 129.9, 129.7, 129.5, 129.2, 129.0, 127.3, 121.5 (t,  $J = 245.4$  Hz), 117.2 (t,  $J = 5.6$  Hz), 116.1, 110.4 (t,  $J = 5.3$  Hz), 66.2, 55.5, 45.4, 45.2, 37.3 (t,  $J =$



(trifluoromethyl)anisole (260  $\mu$ L, 1.8 mmol, 1.5 equiv.), **1q** (407 mg, 1.2 mmol, 1.0 equiv.), *t*BuONa (173 mg, 1.8 mmol, 1.5 equiv.) and 85 wt% *m*CPBA (730 mg, 3.6 mmol, 3.0 equiv.). Purification by column chromatography on silica gel using petroleum ether and ethyl acetate (3:1 (v/v)) as eluent afforded **5aj** with 1:1 d.r. as a yellow white (551 mg, 74% yield).

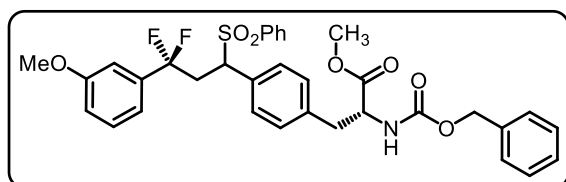

The mixed isomers of **5aj**  $R_f$  = 0.40 (petroleum ether/ ethyl acetate 3:1 (v/v)).

**NMR Spectroscopy:**  $^1\text{H}$  NMR (600 MHz,  $\text{CDCl}_3$ )  $\delta$  7.51 – 7.45 (m, 1H),

7.44 – 7.29 (m, 10H), 7.00 – 6.85 (m, 6H), 6.81 (s, 1H), 5.20 – 5.04 (m, 3H), 4.62 (s, 1H), 4.23 (d,  $J$  = 10.8 Hz, 1H), 3.76 (s, 3H), 3.73 (s, 1H), 3.69 (s, 2H), 3.38 – 3.23 (m, 1H), 3.16 – 2.90 (m, 3H).  $^{19}\text{F}$  NMR (565 MHz,  $\text{CDCl}_3$ )  $\delta$  -91.70 – -92.78 (m, 1F), -94.09 – -94.98 (m, 1F).  $^{13}\text{C}$  NMR (151 MHz,  $\text{CDCl}_3$ )  $\delta$  171.7, 159.7, 155.6, 137.5 (t,  $J$  = 25.7 Hz), 137.4 (t,  $J$  = 25.3 Hz), 136.8, 136.6, 136.4, 136.2, 133.9, 133.8, 131.0, 130.9, 130.1, 130.0, 129.8, 129.3, 129.3, 129.1, 129.1, 128.6, 128.3, 121.5 (t,  $J$  = 244.6 Hz), 117.2 (t,  $J$  = 5.6 Hz), 116.0, 116.0, 110.4, 67.2, 66.4, 55.4, 54.8, 54.7, 52.4, 52.3, 37.8, 37.7, 37.1 (t,  $J$  = 25.3 Hz). **HRMS (ESI)** ( $m/z$ ):  $[\text{M}+\text{Na}]^+$  calcd for  $\text{C}_{34}\text{H}_{33}\text{F}_2\text{NO}_7\text{SNa}^+$ , 660.1838; found 660.1848.

#### 1-(4-(3,3-Difluoro-3-(3-methoxyphenyl)-1-(phenylthio)propyl)phenyl)cyclohexan-1-ol (**4b**)

General procedure A was used with thiophenol (184  $\mu$ L, 1.8 mmol, 1.5 equiv.), 3-(trifluoromethyl)anisole (260  $\mu$ L, 1.8 mmol, 1.5 equiv.), 1-(4-vinylphenyl)cyclohexan-1-ol (242 mg, 1.2 mmol, 1.0 equiv.) and *t*BuONa (173 mg, 1.8 mmol, 1.5 equiv.). Purification by column chromatography on silica gel using petroleum ether and ethyl acetate (5:1 (v/v)) as eluent afforded **4b** with as a colorless oil (528 mg, 94% yield).

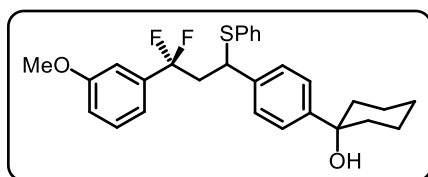

$R_f$  = 0.30 (petroleum ether/ethyl acetate 5:1 (v/v)).

**NMR Spectroscopy:**  $^1\text{H}$  NMR (600 MHz,  $\text{CDCl}_3$ )  $\delta$  7.36 (d,  $J$  = 8.1 Hz, 2H), 7.28 – 7.22 (m, 6H), 7.16

(d,  $J$  = 8.1 Hz, 2H), 6.91 (d,  $J$  = 7.1 Hz, 2H), 6.79 (s, 1H), 4.36 (dd,  $J$  = 9.6, 3.7 Hz,

1H), 3.77 (s, 3H), 2.98 – 2.86 (m, 1H), 2.85 – 2.73 (m, 1H), 1.87 – 1.73 (m, 7H), 1.70 – 1.62 (m, 2H), 1.60 (s, 1H), 1.37 – 1.25 (m, 1H). **<sup>19</sup>F NMR** (565 MHz, CDCl<sub>3</sub>) δ -92.45 – -93.03 (m, 1F), -93.03 – -93.61 (m, 1F). **<sup>13</sup>C NMR** (151 MHz, CDCl<sub>3</sub>) δ 159.6, 148.6, 138.8, 138.1 (t, *J* = 26.2 Hz), 134.4, 132.7, 129.6, 129.0, 127.8, 127.7, 124.8, 121.9 (t, *J* = 245.1 Hz), 117.4 (t, *J* = 6.4 Hz), 115.8, 110.5 (t, *J* = 5.6 Hz), 73.1, 55.4, 47.1, 44.8 (t, *J* = 27.5 Hz), 38.9, 38.9, 25.7, 22.3. **HRMS (ESI)** (m/z): [M+Na]<sup>+</sup> calcd for C<sub>28</sub>H<sub>30</sub>F<sub>2</sub>O<sub>2</sub>SNa<sup>+</sup>, 491.1827; found 491.1834.

#### 6-(3,3-Difluoro-3-(3-methoxyphenyl)-1-(phenylthio)propyl)-3,4-dihydroquinolin-2(1H)-one (4c)

General procedure A was used with thiophenol (184 μL, 1.8 mmol, 1.5 equiv.), 3-(trifluoromethyl)anisole (260 μL, 1.8 mmol, 1.5 equiv.), 6-vinyl-3,4-dihydroquinolin-2(1H)-one (208 mg, 1.2 mmol, 1.0 equiv.) and *t*BuONa (173 mg, 1.8 mmol, 1.5 equiv.). Purification by column chromatography on silica gel using petroleum ether and ethyl acetate (1:1 (v/v)) as eluent afforded **4c** with as a yellow oil (379 mg, 72% yield).

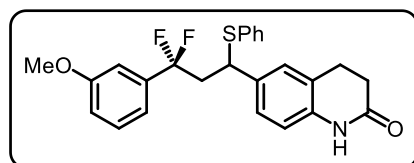

**R<sub>f</sub>** = 0.30 (petroleum ether/ethyl acetate 1:1 (v/v)).

**NMR Spectroscopy:** **<sup>1</sup>H NMR** (600 MHz, CDCl<sub>3</sub>) δ 9.15 (s, 1H), 7.25 (s, 1H), 7.23 (s, 5H), 6.98 (d, *J* = 8.0 Hz, 1H), 6.94 (s, 1H), 6.92 – 6.86 (m, 2H), 6.78 (s, 1H), 6.69 (d, *J* = 8.1 Hz, 1H), 4.29 (dd, *J* = 9.8, 3.5 Hz, 1H), 3.76 (s, 3H), 2.93 – 2.80 (m, 3H), 2.80 – 2.69 (m, 1H), 2.66 – 2.55 (m, 2H). **<sup>19</sup>F NMR** (565 MHz, CDCl<sub>3</sub>) δ -92.39 – -93.10 (m, 1F), -93.13 – -93.87 (m, 1F). **<sup>13</sup>C NMR** (151 MHz, CDCl<sub>3</sub>) δ 172.2, 159.6, 138.0 (t, *J* = 26.4 Hz), 136.6, 135.2, 134.1, 132.8, 129.6, 129.0, 127.8, 127.5, 127.1, 123.6, 121.8 (t, *J* = 245.3 Hz), 117.3 (t, *J* = 6.0 Hz), 115.5, 115.5, 110.7, 55.4, 47.0, 44.7 (t, *J* = 27.1 Hz), 30.7, 25.4. **HRMS (ESI)** (m/z): [M+Na]<sup>+</sup> calcd for C<sub>25</sub>H<sub>23</sub>F<sub>2</sub>NO<sub>2</sub>SNa<sup>+</sup>, 462.1310; found 462.1313.

#### 4-(3,3-Difluoro-3-(3-methoxyphenyl)-1-(phenylthio)propyl)phenyl (S)-2-(4-isobutyl-phenyl)propanoate (4d)

General procedure A was used with thiophenol (184 μL, 1.8 mmol, 1.5 equiv.), 3-

(trifluoromethyl)anisole (260  $\mu$ L, 1.8 mmol, 1.5 equiv.), **1o** (370 mg, 1.2 mmol, 1.0 equiv.) and *t*BuONa (173 mg, 1.8 mmol, 1.5 equiv.). Purification by column chromatography on silica gel using petroleum ether and ethyl acetate (20:1 (v/v)) as eluent afforded **4d** with 1:1 d.r. as a colorless oil (241 mg, 35% yield).

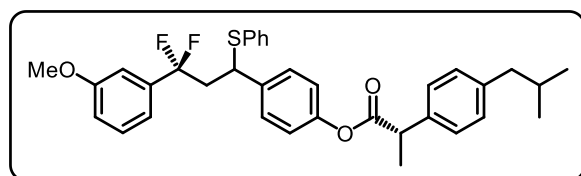

The mixed isomers of **4d**  $R_f$  = 0.30 (petroleum ether/ethyl acetate 20:1 (v/v)). **NMR Spectroscopy:**  $^1\text{H}$  NMR

(600 MHz,  $\text{CDCl}_3$ )  $\delta$  7.30 (d,  $J$  = 7.5 Hz, 2H), 7.29 – 7.26 (m, 1H), 7.21 (s, 5H), 7.18 – 7.11 (m, 4H), 6.92 (d,  $J$  = 8.4 Hz, 1H), 6.89 (d,  $J$  = 7.9 Hz, 3H), 6.82 (s, 1H), 4.30 (dd,  $J$  = 8.9, 3.9 Hz, 1H), 3.92 (q,  $J$  = 6.9 Hz, 1H), 3.76 (s, 3H), 2.91 – 2.68 (m, 2H), 2.49 (d,  $J$  = 7.1 Hz, 2H), 1.98 – 1.82 (m, 1H), 1.61 (d,  $J$  = 7.0 Hz, 3H), 0.93 (d,  $J$  = 6.5 Hz, 6H).  $^{19}\text{F}$  NMR (565 MHz,  $\text{CDCl}_3$ )  $\delta$  -91.66 – -92.56 (m, 1F), -93.89 – -94.99 (m, 1F).  $^{13}\text{C}$  NMR (151 MHz,  $\text{CDCl}_3$ )  $\delta$  173.1, 159.7, 150.2, 141.0, 138.3, 138.0 (t,  $J$  = 21.0 Hz), 137.4, 133.9, 133.1, 129.8, 129.6, 129.0, 128.8, 127.9, 127.4, 121.8 (t,  $J$  = 245.1 Hz), 121.3, 117.3 (t,  $J$  = 6.2 Hz), 115.8, 110.6, 55.4, 47.1, 45.4, 45.2, 45.0 (t,  $J$  = 27.1 Hz), 30.3, 22.5, 18.6. **HRMS (ESI)** ( $m/z$ ):  $[\text{M}+\text{Na}]^+$  calcd for  $\text{C}_{35}\text{H}_{36}\text{F}_2\text{O}_3\text{SNa}^+$ , 597.2245; found 597.2249.

#### 5-(3,3-Difluoro-3-(3-methoxyphenyl)-1-(phenylthio)propyl)benzo[d][1,3]dioxole (**4e**)

General procedure A was used with thiophenol (184  $\mu$ L, 1.8 mmol, 1.5 equiv.), 3-(trifluoromethyl)anisole (260  $\mu$ L, 1.8 mmol, 1.5 equiv.), 5-vinylbenzo[d][1,3]dioxole (152  $\mu$ L, 1.2 mmol, 1.0 equiv.) and *t*BuONa (173 mg, 1.8 mmol, 1.5 equiv.). Purification by column chromatography on silica gel using petroleum ether and ethyl acetate (5:1 (v/v)) as eluent afforded **4e** as a yellow oil (402 mg, 81% yield).

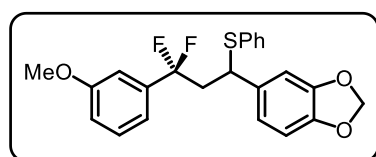

$R_f$  = 0.50 (petroleum ether/ethyl acetate 5:1 (v/v)).

**NMR Spectroscopy:**  $^1\text{H}$  NMR (600 MHz,  $\text{CDCl}_3$ )  $\delta$  7.30 – 7.27 (m, 1H), 7.24 (s, 5H), 6.96 – 6.88 (m, 2H),

6.83 (s, 1H), 6.76 (s, 1H), 6.68 – 6.57 (m, 2H), 5.93 (d,  $J$  = 4.7 Hz, 2H), 4.28 (d,  $J$  = 6.3 Hz, 1H), 3.78 (s, 3H), 2.96 – 2.60 (m, 2H).  $^{19}\text{F}$  NMR (565 MHz,  $\text{CDCl}_3$ )  $\delta$  -92.23 (ddd,

$J = 245.2, 17.0, 12.2$  Hz, 1F),  $-93.91 - -94.75$  (m, 1F).  **$^{13}\text{C}$  NMR** (151 MHz,  $\text{CDCl}_3$ )  $\delta$  159.7, 147.8, 146.9, 138.1 (t,  $J = 26.3$  Hz), 134.5, 134.3, 132.8, 129.7, 129.0, 127.7, 121.8 (t,  $J = 245.1$  Hz), 121.6, 117.4 (t,  $J = 6.1$  Hz), 115.7, 110.6, 108.1, 108.0, 101.2, 55.4, 47.5, 45.0 (t,  $J = 27.3$  Hz). **HRMS (ESI)** ( $m/z$ ):  $[\text{M}+\text{Na}]^+$  calcd for  $\text{C}_{23}\text{H}_{20}\text{F}_2\text{O}_3\text{SNa}^+$ , 437.0993; found 437.1001.

#### 1-(4-(3,3-Difluoro-3-(3-methoxyphenyl)-1-(phenylthio)propyl)phenyl)-1H-pyrazole (4f)

General procedure A was used with thiophenol (184  $\mu\text{L}$ , 1.8 mmol, 1.5 equiv.), 3-(trifluoromethyl)anisole (260  $\mu\text{L}$ , 1.8 mmol, 1.5 equiv.), 1-(4-vinylphenyl)-1H-pyrazole (204 mg, 1.2 mmol, 1.0 equiv.) and *t*BuONa (173 mg, 1.8 mmol, 1.5 equiv.). Purification by column chromatography on silica gel using petroleum ether and ethyl acetate (10:1 (v/v)) as eluent afforded **4f** as a colorless oil (445 mg, 85% yield).

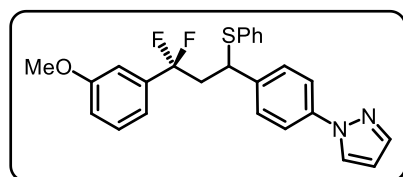

$R_f = 0.20$  (petroleum ether/ethyl acetate 10:1 (v/v)).

**NMR Spectroscopy:**  **$^1\text{H}$  NMR** (600 MHz,  $\text{CDCl}_3$ )  $\delta$  7.95 – 7.84 (m, 1H), 7.71 (s, 1H), 7.55 (d,  $J = 8.4$  Hz, 2H), 7.30 – 7.26 (m, 1H), 7.25 (s, 1H), 7.24 – 7.20 (m, 6H), 6.97 – 6.87 (m, 2H), 6.82 (s, 1H), 6.46 (s, 1H), 4.35 (dd,  $J = 9.6, 3.8$  Hz, 1H), 3.76 (s, 3H), 2.94 – 2.73 (m, 2H).  **$^{19}\text{F}$  NMR** (565 MHz,  $\text{CDCl}_3$ )  $\delta$   $-92.03$  (ddd,  $J = 245.2, 17.7, 11.1$  Hz, 1F),  $-93.91 - -95.26$  (m, 1F).  **$^{13}\text{C}$  NMR** (151 MHz,  $\text{CDCl}_3$ )  $\delta$  159.7, 141.2, 139.4, 139.1, 133.8, 133.2, 129.8, 129.1, 129.1, 128.0, 126.8, 121.8 (t,  $J = 244.4$  Hz), 119.1, 117.4 (t,  $J = 6.2$  Hz), 115.7, 110.7 (t,  $J = 5.7$  Hz), 107.7, 55.5, 47.2, 44.8 (t,  $J = 27.1$  Hz). **HRMS (ESI)** ( $m/z$ ):  $[\text{M}+\text{Na}]^+$  calcd for  $\text{C}_{25}\text{H}_{22}\text{F}_2\text{N}_2\text{OSNa}^+$ , 459.1313; found 459.1326.

#### Compound (4g)

General procedure A was used with thiophenol (184  $\mu\text{L}$ , 1.8 mmol, 1.5 equiv.), 3-(trifluoromethyl)anisole (260  $\mu\text{L}$ , 1.8 mmol, 1.5 equiv.), **1p** (495 mg, 1.2 mmol, 1.0 equiv.) and *t*BuONa (173 mg, 1.8 mmol, 1.5 equiv.). Purification by preparation of thin layer chromatography using petroleum ether and ethyl acetate (50:1 (v/v)) as eluent afforded **4g** with 1:1 d.r. as a colorless oil (684 mg, 84% yield).



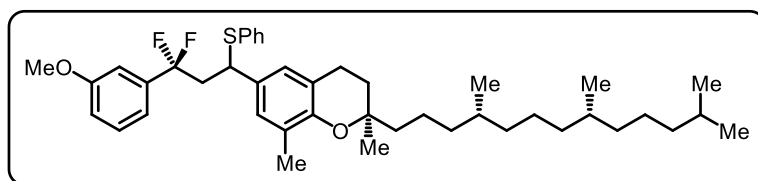

The mixed isomers of **4g**  $R_f$  = 0.30 (petroleum ether/ethyl acetate 50:1 (v/v)). **NMR**

**Spectroscopy:**  $^1\text{H}$  NMR (600 MHz,  $\text{CDCl}_3$ )  $\delta$  7.26 – 7.20 (m, 6H), 6.91 – 6.84 (m, 2H), 6.78 (d,  $J$  = 11.9 Hz, 2H), 6.63 (s, 1H), 4.24 (dd,  $J$  = 9.7, 3.5 Hz, 1H), 3.75 (s, 3H), 2.94 – 2.80 (m, 1H), 2.81 – 2.65 (m, 1H), 2.65 – 2.52 (m, 2H), 2.10 (s, 3H), 1.81 – 1.75 (m, 1H), 1.74 – 1.68 (m, 1H), 1.58 – 1.51 (m, 3H), 1.30 – 1.04 (m, 18H), 0.88 (d,  $J$  = 6.6 Hz, 8H), 0.86 (d,  $J$  = 6.7 Hz, 4H), 0.13 – 0.05 (m, 3H).  $^{19}\text{F}$  NMR (565 MHz,  $\text{CDCl}_3$ )  $\delta$  -91.71 – -92.72 (m, 1F), -92.94 – -94.20 (m, 1F).  $^{13}\text{C}$  NMR (126 MHz,  $\text{CDCl}_3$ )  $\delta$  159.5, 151.5, 135.0, 132.4, 130.0, 129.4, 128.9, 127.8, 127.7, 127.4, 126.4, 126.4, 125.6, 120.3 (t,  $J$  = 213.9 Hz), 117.5 (t,  $J$  = 6.2 Hz), 115.6, 110.5 (t,  $J$  = 6.4 Hz), 76.2, 55.4, 46.9 (t,  $J$  = 3.1 Hz), 44.7 (t,  $J$  = 27.2 Hz), 44.6 (t,  $J$  = 27.3 Hz), 40.5, 40.4, 39.5, 37.7, 37.6, 37.5, 33.0, 32.9, 31.3, 28.1, 25.0, 24.6, 24.4, 24.3, 22.9, 22.8, 22.4, 21.2, 19.9, 19.8, 16.2. **HRMS (ESI)** ( $m/z$ ):  $[\text{M}+\text{Na}]^+$  calcd for  $\text{C}_{43}\text{H}_{60}\text{F}_2\text{O}_2\text{SNa}^+$ , 701.4174; found 701.4180.

### Compound (4h)

General procedure A was used with thiophenol (184  $\mu\text{L}$ , 1.8 mmol, 1.5 equiv.), 3-(trifluoromethyl)anisole (260  $\mu\text{L}$ , 1.8 mmol, 1.5 equiv.), **1q** (407 mg, 1.2 mmol, 1.0 equiv.) and  $t\text{BuONa}$  (173 mg, 1.8 mmol, 1.5 equiv.). Purification by column chromatography on silica gel using petroleum ether and ethyl acetate (5:1 (v/v)) as eluent afforded **4h** with 1:1 d.r. as a white solid (581 mg, 80% yield).

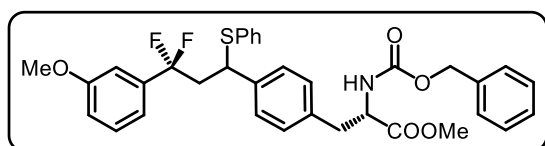

The mixed isomers of **4h**  $R_f$  = 0.20 (petroleum ether/ethyl acetate 5:1 (v/v)).

**NMR Spectroscopy:**  $^1\text{H}$  NMR (600 MHz,

$\text{CDCl}_3$ )  $\delta$  7.38 – 7.35 (m, 3H), 7.35 – 7.29 (m, 2H), 7.26 – 7.22 (m, 1H), 7.22 – 7.11 (m, 5H), 7.11 – 6.99 (m, 2H), 6.98 – 6.92 (m, 2H), 6.92 – 6.86 (m, 2H), 6.82 (s, 1H), 5.21 – 5.07 (m, 3H), 4.64 (dd,  $J$  = 13.1, 5.8 Hz, 1H), 4.27 (d,  $J$  = 8.0 Hz, 1H), 3.76 (s, 3H), 3.69 (d,  $J$  = 8.4 Hz, 2H), 3.06 (d,  $J$  = 5.4 Hz, 2H), 2.91 – 2.80 (m, 1H), 2.80 – 2.69

(m, 1H). **<sup>19</sup>F NMR** (565 MHz, CDCl<sub>3</sub>) δ -91.64 – -92.93 (m, 1F), -93.58 – -94.55 (m, 1F). **<sup>13</sup>C NMR** (151 MHz, CDCl<sub>3</sub>) δ 171.9, 159.7, 155.7, 139.7, 138.1 (t, *J* = 25.4 Hz), 136.4, 134.9, 134.8, 133.9, 133.8, 133.3, 133.2, 129.7, 129.3, 129.0, 128.7, 128.4, 128.3, 128.2, 127.9, 127.8, 121.8 (t, *J* = 245.1 Hz), 117.4 (t, *J* = 5.6 Hz), 115.8, 110.6, 67.2, 55.5, 54.9, 52.4, 47.3, 47.2, 44.8 (t, *J* = 21.0 Hz), 44.7 (t, *J* = 23.7 Hz), 38.0. **HRMS (ESI)** (m/z): [M+Na]<sup>+</sup> calcd for C<sub>34</sub>H<sub>33</sub>F<sub>2</sub>NO<sub>5</sub>SN<sup>+</sup>, 628.1940; found 628.2086.

***tert*-Butyl 4-(4-(3,3-difluoro-3-(3-methoxyphenyl)-1-(phenylthio)propyl)phenyl)piperazine-1-carboxylate (4i)**

General procedure A was used with thiophenol (184 μL, 1.8 mmol, 1.5 equiv.), 3-(trifluoromethyl)anisole (260 μL, 1.8 mmol, 1.5 equiv.), *tert*-butyl 4-(4-vinylphenyl)piperazine-1-carboxylate (346 mg, 1.2 mmol, 1.0 equiv.) and *t*BuONa (173 mg, 1.8 mmol, 1.5 equiv.). Purification by column chromatography on silica gel using petroleum ether and ethyl acetate (5:1 (v/v)) as eluent afforded **4i** as a yellow oil (559 mg, 84% yield).

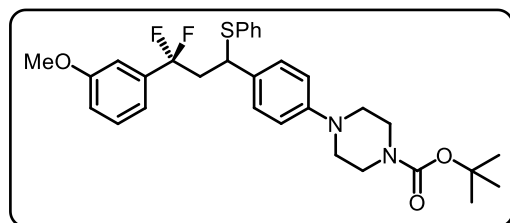

**R<sub>f</sub>** = 0.30 (petroleum ether/ethyl acetate 5:1 (v/v)). **NMR Spectroscopy:** **<sup>1</sup>H NMR** (600 MHz, CDCl<sub>3</sub>) δ 7.25 (s, 1H), 7.22 (s, 5H), 7.10 (d, *J* = 7.3 Hz, 2H), 6.95 – 6.85 (m, 2H),

6.82 – 6.75 (m, 3H), 4.28 (d, *J* = 9.2 Hz, 1H), 3.77 (s, 3H), 3.57 (s, 4H), 3.11 (s, 4H), 2.92 – 2.78 (m, 1H), 2.78 – 2.65 (m, 1H), 1.49 (s, 9H). **<sup>19</sup>F NMR** (565 MHz, CDCl<sub>3</sub>) δ -90.98 – -92.49 (m, 1F), -93.95 – -95.17 (m, 1F). **<sup>13</sup>C NMR** (151 MHz, CDCl<sub>3</sub>) δ 159.7, 154.9, 150.5, 138.3 (t, *J* = 26.7 Hz), 134.6, 132.6, 131.9, 129.6, 129.0, 128.8, 127.5, 121.9 (t, *J* = 244.9 Hz), 117.4 (t, *J* = 6.0 Hz), 116.3, 115.8, 110.6 (t, *J* = 5.4 Hz), 80.0, 55.4, 49.3, 46.9, 44.8 (t, *J* = 26.6 Hz), 28.6. **HRMS (ESI)** (m/z): [M+Na]<sup>+</sup> calcd for C<sub>31</sub>H<sub>36</sub>F<sub>2</sub>N<sub>2</sub>O<sub>3</sub>SN<sup>+</sup>, 577.2307; found 577.2315.

**Compound (4j)**

General procedure A was used with thiophenol (184 μL, 1.8 mmol, 1.5 equiv.), 3-(trifluoromethyl)anisole (260 μL, 1.8 mmol, 1.5 equiv.), **1n** (336 mg, 1.2 mmol, 1.0

equiv.) and *t*BuONa (173 mg, 1.8 mmol, 1.5 equiv.). Purification by column chromatography on silica gel using petroleum ether and ethyl acetate (10:1 (v/v)) as eluent afforded **4j** with 1:1 d.r. as a white solid (531 mg, 81% yield).

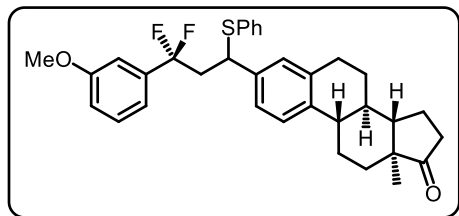

**The mixed isomers of 4j**  $R_f$  = 0.10 (petroleum ether/ethyl acetate 10:1 (v/v)). **NMR Spectroscopy:**  $^1\text{H}$  NMR (600 MHz,  $\text{CDCl}_3$ )  $\delta$  7.24 (s, 6H), 7.18 – 7.12 (m, 1H), 7.03 – 6.96 (m, 1H), 6.92 – 6.83 (m, 3H), 6.76 (s, 1H), 4.29 (dd,  $J$  = 9.6, 3.5 Hz, 1H), 3.75 (s, 3H), 2.94 – 2.85 (m, 1H), 2.85 – 2.78 (m, 2H), 2.78 – 2.67 (m, 1H), 2.51 (dd,  $J$  = 19.0, 8.7 Hz, 1H), 2.43 – 2.35 (m, 1H), 2.31 – 2.21 (m, 1H), 2.19 – 2.11 (m, 1H), 2.09 – 2.03 (m, 1H), 2.02 – 1.95 (m, 2H), 1.67 – 1.56 (m, 2H), 1.54 – 1.47 (m, 3H), 1.47 – 1.37 (m, 1H), 0.92 (s, 3H).  $^{19}\text{F}$  NMR (565 MHz,  $\text{CDCl}_3$ )  $\delta$  -92.29 – -93.09 (m, 1F), -93.15 – -94.02 (m, 1F).  $^{13}\text{C}$  NMR (126 MHz,  $\text{CDCl}_3$ )  $\delta$  220.9, 159.5, 139.0, 138.1 (t,  $J$  = 26.1 Hz), 137.6, 137.6, 136.5, 136.5, 134.7, 134.6, 132.3, 132.3, 129.5, 129.0, 128.4, 128.4, 127.5, 125.5, 125.4, 125.2, 125.1, 121.9 (t,  $J$  = 245.0 Hz), 117.3 (t,  $J$  = 6.1 Hz), 115.7, 110.4 (t,  $J$  = 6.5 Hz), 55.3, 50.6, 48.1, 46.8, 44.7 (t,  $J$  = 27.2 Hz), 44.6 (t,  $J$  = 27.3 Hz), 44.4, 38.1, 35.9, 31.7, 29.4, 26.6, 25.7, 21.7, 14.0. **HRMS (ESI)** ( $m/z$ ):  $[\text{M}+\text{Na}]^+$  calcd for  $\text{C}_{34}\text{H}_{36}\text{F}_2\text{O}_2\text{SNa}^+$ , 569.2296; found 569.2305.

### Compound (4k)

General procedure A was used with thiophenol (184  $\mu\text{L}$ , 1.8 mmol, 1.5 equiv.), 3-(trifluoromethyl)anisole (260  $\mu\text{L}$ , 1.8 mmol, 1.5 equiv.), **1t** (162 mg, 1.2 mmol, 1.0 equiv.) and *t*BuONa (173 mg, 1.8 mmol, 1.5 equiv.). Purification by column chromatography on silica gel using petroleum ether and ethyl acetate (10:1 (v/v)) as eluent afforded **4k** as a colorless oil (395 mg, 82% yield).

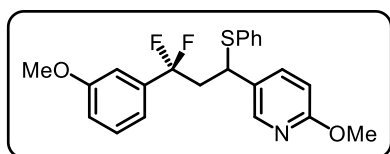

**$R_f$**  = 0.30 (petroleum ether/ethyl acetate 10:1 (v/v)). **NMR Spectroscopy:**  $^1\text{H}$  NMR (600 MHz,  $\text{CDCl}_3$ )  $\delta$  7.81 (d,  $J$  = 1.7 Hz, 1H), 7.49 – 7.42 (m, 1H), 7.29 – 7.26 (m, 1H), 7.22 (s, 5H), 6.91 (d,  $J$  = 8.2 Hz, 1H), 6.88 (d,  $J$  = 7.6 Hz, 1H), 6.79 (s, 1H), 6.62 (d,  $J$  = 8.6 Hz, 1H), 4.33 – 4.23 (m, 1H), 3.89 (s, 3H), 3.77 (s, 3H), 2.87 –

2.71 (m, 2H). **<sup>19</sup>F NMR** (565 MHz, CDCl<sub>3</sub>) δ -91.84 – -92.49 (m, 1F), -93.81 – -94.52 (m, 1F). **<sup>13</sup>C NMR** (151 MHz, CDCl<sub>3</sub>) δ 163.5, 159.7, 146.2, 137.9 (t, *J* = 25.9 Hz), 137.8, 133.5, 133.2, 129.8, 129.1, 128.9, 128.1, 121.8 (t, *J* = 245.2 Hz), 117.3 (t, *J* = 6.1 Hz), 115.8, 110.9, 110.6 (t, *J* = 6.2 Hz), 55.4, 53.6, 44.6, 44.5 (t, *J* = 27.2 Hz).

### Compound (4l)

To a 20 mL oven dried screw-cap vial equipped with a magnetic stir bar was added *t*BuOLi (144 mg, 1.8 mmol, 1.5 equiv.) in dry DMA (18 mL), followed by thiophenol (184 μL, 1.8 mmol, 1.5 equiv.), 3-(trifluoromethyl)anisole (174 μL, 1.2 mmol, 1.0 equiv.) and **1u** (386 μL, 1.8 mmol, 1.5 equiv.) under a nitrogen atmosphere. The reaction mixture was stirred vigorously at room temperature and exposed to 30 W 365 nm LED for 2 hours. After reaction, purification by column chromatography on silica gel using petroleum ether and ethyl acetate (100:1 (v/v)) as eluent afforded **4l** as a colorless oil (224 mg, 50% yield).

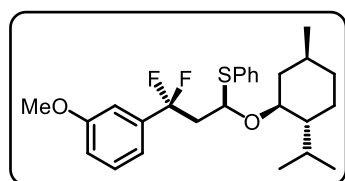

**The mixed isomers of 4l** *R<sub>f</sub>* = 0.40 (petroleum ether/ethyl acetate 100:1 (v/v)). **NMR Spectroscopy:** **<sup>1</sup>H NMR** (600 MHz, CDCl<sub>3</sub>) δ 7.43 (d, *J* = 6.7 Hz, 2H), 7.32 – 7.26 (m, 4H), 6.98 (d, *J* = 7.6 Hz, 1H), 6.96 – 6.90 (m, 2H), 5.18

(d, *J* = 5.8 Hz, 1H), 3.80 (s, 3H), 3.62 – 3.52 (m, 1H), 2.81 – 2.62 (m, 2H), 2.19 – 2.09 (m, 1H), 1.86 (d, *J* = 11.8 Hz, 1H), 1.60 (t, *J* = 12.9 Hz, 2H), 1.27 – 1.15 (m, 1H), 1.05 (t, *J* = 11.2 Hz, 1H), 1.00 – 0.89 (m, 1H), 0.86 (d, *J* = 5.3 Hz, 6H), 0.79 (d, *J* = 6.8 Hz, 3H), 0.78 – 0.75 (m, 1H), 0.67 – 0.55 (m, 1H). **<sup>19</sup>F NMR** (565 MHz, CDCl<sub>3</sub>) δ -90.65 – -91.43 (m, 1F), -94.29 – -95.16 (m, 1F). **<sup>13</sup>C NMR** (151 MHz, CDCl<sub>3</sub>) δ 159.6, 138.5 (t, *J* = 26.1 Hz), 133.8, 133.1, 129.5, 129.1, 127.6, 121.5 (t, *J* = 244.1 Hz), 117.7 (t, *J* = 6.1 Hz), 115.5, 110.9 (t, *J* = 5.9 Hz), 79.7, 75.6, 55.4, 48.1, 46.4 (t, *J* = 27.7 Hz), 38.8, 34.6, 31.5, 25.1, 23.1, 22.5, 21.3, 16.2.

### Compound (4m)

To a 20 mL oven dried screw-cap vial equipped with a magnetic stir bar was added *t*BuOLi (144 mg, 1.8 mmol, 1.5 equiv.) in dry DMA (18 mL), followed by thiophenol

(184  $\mu$ L, 1.8 mmol, 1.5 equiv.), 3-(trifluoromethyl)anisole (174  $\mu$ L, 1.2 mmol, 1.0 equiv.) and **1v** (746 mg, 1.8 mmol, 1.5 equiv.) under a nitrogen atmosphere. The reaction mixture was stirred vigorously at room temperature and exposed to 30 W 365 nm LED for 2 hours. After reaction, purification by column chromatography on silica gel using petroleum ether and ethyl acetate (100:1 (v/v)) as eluent afforded **4m** as a colorless oil (500 mg, 61% yield).

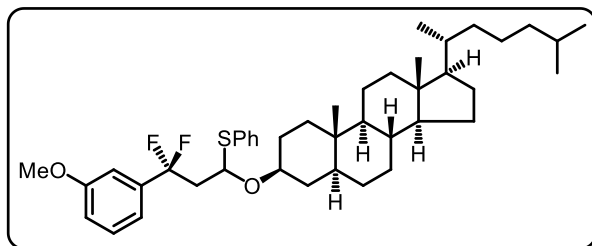

**The mixed isomers of 4m**  $R_f$  = 0.20 (petroleum ether/ethyl acetate 100:1 (v/v)). **NMR Spectroscopy:**  $^1\text{H}$  NMR (600 MHz,  $\text{CDCl}_3$ )  $\delta$  7.50 – 7.45 (m, 2H), 7.29 (s, 4H), 6.99 (d,  $J$  = 7.7 Hz,

1H), 6.97 – 6.91 (m, 2H), 5.08 – 5.02 (m, 1H), 3.80 (s, 3H), 3.78 – 3.70 (m, 1H), 2.71 – 2.51 (m, 2H), 1.97 (d,  $J$  = 12.6 Hz, 1H), 1.86 – 1.73 (m, 2H), 1.75 – 1.59 (m, 3H), 1.61 – 1.38 (m, 5H), 1.40 – 1.29 (m, 5H), 1.29 – 1.18 (m, 5H), 1.18 – 1.05 (m, 6H), 1.05 – 0.94 (m, 4H), 0.91 (d,  $J$  = 6.5 Hz, 3H), 0.88 (d,  $J$  = 2.5 Hz, 3H), 0.87 (d,  $J$  = 2.5 Hz, 3H), 0.77 (d,  $J$  = 4.9 Hz, 3H), 0.66 (s, 3H).  $^{19}\text{F}$  NMR (565 MHz,  $\text{CDCl}_3$ )  $\delta$  -91.53 – -92.74 (m, 1F), -93.97 – -94.75 (m, 1F).  $^{13}\text{C}$  NMR (151 MHz,  $\text{CDCl}_3$ )  $\delta$  159.6, 138.6 (t,  $J$  = 26.4 Hz), 138.5 (t,  $J$  = 25.9 Hz), 134.3, 134.2, 132.3, 132.1, 129.6, 129.0, 128.0, 128.0, 121.5 (t,  $J$  = 244.5 Hz), 121.4 (t,  $J$  = 244.4 Hz), 117.7 (t,  $J$  = 5.7 Hz), 117.6 (t,  $J$  = 6.4 Hz), 115.5, 111.0 (t,  $J$  = 5.8 Hz), 79.9, 79.8, 76.5, 76.3, 56.6, 56.5, 55.4, 54.5, 54.4, 46.4 (t,  $J$  = 27.1 Hz), 46.3 (t,  $J$  = 27.4 Hz), 45.1, 44.8, 42.8, 40.2, 39.7, 37.2, 37.0, 36.3, 35.9, 35.8, 35.8, 35.7, 35.6, 35.5, 33.2, 32.3, 32.2, 29.0, 28.9, 28.3, 28.4, 28.2, 26.7, 24.4, 24.0, 23.0, 22.7, 21.4, 21.3, 18.8, 12.4, 12.3, 12.2.

### Compound (4n)

General procedure A was used with thiophenol (184  $\mu$ L, 1.8 mmol, 1.5 equiv.), **2p** (290 mg, 1.8 mmol, 1.5 equiv.), styrene (138  $\mu$ L, 1.2 mmol, 1.0 equiv.) and *t*BuONa (173 mg, 1.8 mmol, 1.5 equiv.). Purification by column chromatography on silica gel using petroleum ether and ethyl acetate (100:1 (v/v)) as eluent afforded **4n** as a colorless oil (430 mg, 77% yield).

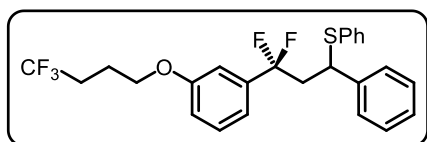

$R_f = 0.40$  (petroleum ether/ethyl acetate 100:1 (v/v)). **NMR Spectroscopy:**  $^1\text{H}$  NMR (600 MHz,  $\text{CDCl}_3$ )  $\delta$  7.28 (d,  $J = 8.0$  Hz, 1H), 7.25 – 7.20 (m,

7H), 7.20 – 7.16 (m, 3H), 6.95 – 6.87 (m, 2H), 6.81 (s, 1H), 4.33 (dd,  $J = 9.4, 4.1$  Hz, 1H), 3.96 (t,  $J = 5.9$  Hz, 2H), 2.96 – 2.83 (m, 1H), 2.83 – 2.70 (m, 1H), 2.38 – 2.24 (m, 2H), 2.09 – 1.99 (m, 2H).  $^{19}\text{F}$  NMR (565 MHz,  $\text{CDCl}_3$ )  $\delta$  -66.27 (t,  $J = 10.7$  Hz, 3F), -92.20 (ddd,  $J = 245.2, 18.0, 11.6$  Hz, 1F), -94.11 – -94.69 (m, 1F).  $^{13}\text{C}$  NMR (151 MHz,  $\text{CDCl}_3$ )  $\delta$  158.7, 140.8, 138.3 (t,  $J = 26.3$  Hz), 134.2, 132.9, 129.8, 129.0, 128.5, 128.0, 127.7, 127.5, 127.1 (q,  $J = 276.3$  Hz), 121.8 (t,  $J = 244.9$  Hz), 117.8 (t,  $J = 6.1$  Hz), 116.1, 111.2 (t,  $J = 6.3$  Hz), 66.2, 47.6, 44.9 (t,  $J = 27.2$  Hz), 30.8 (q,  $J = 29.2$  Hz), 22.3 (t,  $J = 2.9$  Hz).

### Compound (4o)

General procedure A was used with thiophenol (184  $\mu\text{L}$ , 1.8 mmol, 1.5 equiv.), **2q** (984 mg, 1.8 mmol, 1.5 equiv.), styrene (138  $\mu\text{L}$ , 1.2 mmol, 1.0 equiv.) and *t*BuONa (173 mg, 1.8 mmol, 1.5 equiv.). Purification by preparation of thin layer chromatography using petroleum ether and ethyl acetate (40:1 (v/v)) as eluent afforded **4o** with 1:1 d.r. as a colorless oil (284 mg, 32% yield).

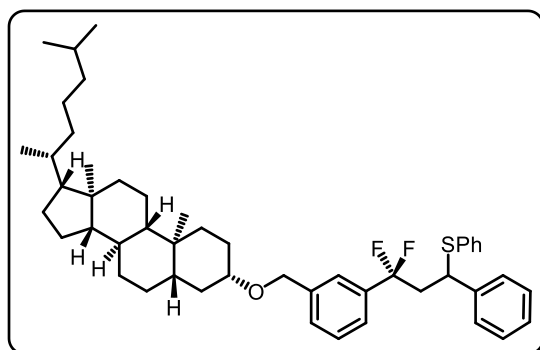

The mixed isomers of **4o**  $R_f = 0.40$  (petroleum ether/ethyl acetate 40:1 (v/v)).

**NMR Spectroscopy:**  $^1\text{H}$  NMR (600 MHz,  $\text{CDCl}_3$ )  $\delta$  7.40 – 7.35 (m, 1H), 7.35 – 7.30 (m, 1H), 7.29 (s, 1H), 7.21 (s, 8H), 7.19 – 7.15 (m, 3H), 4.55 – 4.48 (m, 2H), 4.33

(dd,  $J = 8.7, 3.1$  Hz, 1H), 3.37 – 3.26 (m, 1H), 2.94 – 2.82 (m, 1H), 2.82 – 2.70 (m, 1H), 1.97 (d,  $J = 12.3$  Hz, 1H), 1.90 (d,  $J = 11.2$  Hz, 1H), 1.85 – 1.76 (m, 1H), 1.74 (d,  $J = 12.8$  Hz, 1H), 1.67 (s, 2H), 1.59 – 1.41 (m, 5H), 1.39 – 1.31 (m, 5H), 1.31 – 1.24 (m, 5H), 1.18 – 1.01 (m, 8H), 1.01 – 0.95 (m, 2H), 0.90 (d,  $J = 6.1$  Hz, 3H), 0.87 (d,  $J = 4.6$  Hz, 6H), 0.82 (s, 3H), 0.65 (s, 3H).  $^{19}\text{F}$  NMR (565 MHz,  $\text{CDCl}_3$ )  $\delta$  -91.65 – -92.57 (m, 1F), -94.65 (ddd,  $J = 245.7, 35.3, 18.7$  Hz, 1F).  $^{13}\text{C}$  NMR (151 MHz,  $\text{CDCl}_3$ )  $\delta$  140.9,

139.9, 136.8 (t,  $J = 26.0$  Hz), 134.2, 132.9, 129.0, 128.6, 128.5, 128.0, 127.7, 127.5, 124.1, 124.1, 124.1, 122.1 (t,  $J = 245.8$  Hz), 78.6, 72.0, 69.5, 59.2, 56.7, 56.5, 54.6, 47.5, 45.0, 44.9 (t,  $J = 27.1$  Hz), 42.8, 40.2, 39.7, 37.2, 36.3, 36.0, 35.9, 35.7, 35.0, 32.3, 29.0, 28.5, 28.4, 28.2, 24.4, 24.0, 23.0, 22.7, 21.4, 18.8, 12.5, 12.2. **HRMS (ESI)** ( $m/z$ ):  $[M+Na]^+$  calcd for  $C_{49}H_{66}F_2OSNa^+$ , 763.4695; found 763.4717.

### Compound (4p)

General procedure A was used with thiophenol (184  $\mu$ L, 1.8 mmol, 1.5 equiv.), **2n** (1.8 mmol, 753 mg, 1.5 equiv.), styrene (138  $\mu$ L, 1.2 mmol, 1.0 equiv.) and *t*BuONa (173 mg, 1.8 mmol, 1.5 equiv.). Purification by column chromatography on silica gel using petroleum ether and ethyl acetate (10:1 (v/v)) as eluent afforded **4p** with 1:1 d.r. as a colorless oil (485 mg, 66% yield).

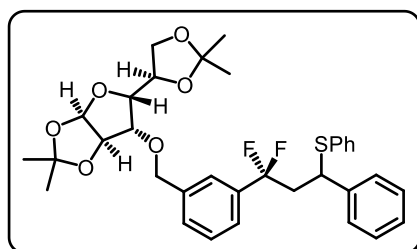

The mixed isomers of **4p**  $R_f = 0.30$  (petroleum ether/ethyl acetate 10:1 (v/v)). **NMR Spectroscopy:**

**$^1H$  NMR** (600 MHz,  $CDCl_3$ )  $\delta$  7.40 – 7.36 (m, 1H), 7.35 – 7.30 (m, 1H), 7.28 (s, 1H), 7.26 – 7.19 (m, 8H), 7.19 – 7.14 (m, 3H), 5.93 – 5.83 (m, 1H), 4.68 – 4.60 (m, 2H), 4.60 – 4.57 (m, 1H), 4.38 – 4.26 (m, 2H), 4.15 – 4.08 (m, 2H), 4.05 – 3.97 (m, 2H), 3.06 – 2.62 (m, 2H), 1.50 (s, 3H), 1.42 (d,  $J = 2.8$  Hz, 3H), 1.35 (s, 3H), 1.32 (s, 3H).  **$^{19}F$  NMR** (565 MHz,  $CDCl_3$ )  $\delta$  -92.24 – -93.10 (m, 1F), -93.61 – -94.39 (m, 1F).  **$^{13}C$  NMR** (151 MHz,  $CDCl_3$ )  $\delta$  138.5, 136.7, 133.9, 132.2, 129.9, 129.4, 129.2, 129.0, 128.8, 128.5, 124.5 (t,  $J = 5.6$  Hz), 124.1 (t,  $J = 6.1$  Hz), 121.6 (t,  $J = 245.2$  Hz), 112.0, 109.3, 109.3, 105.5, 82.8, 82.2, 81.5, 72.5, 72.0, 72.0, 67.7, 66.8, 37.3 (t,  $J = 26.7$  Hz), 27.0, 26.4, 25.5. **HRMS (ESI)** ( $m/z$ ):  $[M+Na]^+$  calcd for  $C_{34}H_{38}F_2O_6SNa^+$ , 635.2249; found 635.2252.

### Compound (4q)

General procedure A was used with thiophenol (184  $\mu$ L, 1.8 mmol, 1.5 equiv.), **2r** (733 mg, 1.8 mmol, 1.5 equiv.), styrene (138  $\mu$ L, 1.2 mmol, 1.0 equiv.) and *t*BuONa (173 mg, 1.8 mmol, 1.5 equiv.). Purification by column chromatography on silica gel using

petroleum ether and ethyl acetate (10:1 (v/v)) as eluent afforded **4q** as a white solid (296 mg, 41% yield).

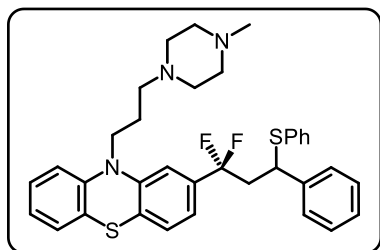

$R_f = 0.40$  (petroleum ether/ethyl acetate 10:1 (v/v)).

**NMR Spectroscopy:**  $^1\text{H}$  NMR (600 MHz,  $\text{CDCl}_3$ )  $\delta$  7.22 – 7.09 (m, 12H), 7.07 (d,  $J = 7.9$  Hz, 1H), 6.96 – 6.92 (m, 1H), 6.89 (d,  $J = 8.1$  Hz, 1H), 6.83 (d,  $J = 7.9$  Hz, 1H), 6.72 (s, 1H), 4.27 (dd,  $J = 9.4, 4.0$  Hz, 1H),

3.83 (t,  $J = 6.8$  Hz, 2H), 2.91 – 2.80 (m, 1H), 2.79 – 2.68 (m, 1H), 2.68 – 1.92 (m, 13H), 1.92 – 1.83 (m, 2H).  $^{19}\text{F}$  NMR (565 MHz,  $\text{CDCl}_3$ )  $\delta$  -91.50 – -92.13 (m, 1F), -92.90 – -93.53 (m, 1F).  $^{13}\text{C}$  NMR (151 MHz,  $\text{CDCl}_3$ )  $\delta$  145.6, 144.8, 140.7, 134.1, 133.0, 129.0, 128.5, 128.0, 127.8, 127.6, 127.6, 127.5, 127.5, 127.3, 124.6, 123.0, 119.3 (t,  $J = 398.3$  Hz), 116.0, 112.1 (t,  $J = 6.1$  Hz), 55.7, 55.3, 53.5, 47.7, 46.2, 45.5, 44.9 (t,  $J = 27.6$  Hz), 24.4. **HRMS (ESI)** ( $m/z$ ):  $[\text{M}+\text{Na}]^+$  calcd for  $\text{C}_{35}\text{H}_{37}\text{F}_2\text{N}_3\text{S}_2\text{H}^+$ , 601.2470; found 602.2477.

## 5 Synthetic Applications

### 5.1 Gram-scale Reaction

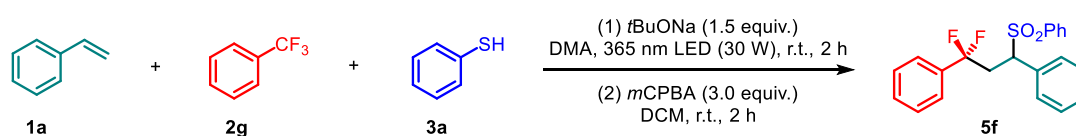

To a 250 mL oven dried screw-cap vial equipped with a magnetic stir bar was added  $t\text{BuONa}$  (1.44 g, 15 mmol, 1.5 equiv.) in dry DMA (100 mL), followed by thiophenol (1.5 mL, 15 mmol, 1.5 equiv.), benzotrifluoride (1.8 mL, 15 mmol, 1.5 equiv.) and styrene (1.1 mL, 10 mmol, 1.0 equiv.) under a nitrogen atmosphere. The reaction mixture was stirred vigorously at room temperature and exposed to 30 W 365 nm LED for 2 hours. After the completion of the reaction, the resulting reaction mixture was concentrated *in vacuo* yielding the crude product which was used in the next step without further purification. Next, a 500 mL round bottomed flask charged with crude



product in DCM (200 mL) was added 85 wt% 3-chloroperoxybenzoic acid (6.1 g, 30 mmol, 3.0 equiv.). The reaction mixture was stirred for 4 hours at room temperature. After the completion of the reaction, the reaction was diluted with dichloromethane (100 mL) and extracted with saturated sodium bicarbonate solution (60 mL) until the solution was neutral, and water (2 x 60 mL). The organic phase was dried over anhydrous MgSO<sub>4</sub>, filtered, and the solvent was removed *in vacuo*. Purification by column chromatography on silica gel using petroleum ether and ethyl acetate (10:1 (v/v)) as eluent afforded **5f** as a white solid (3.39 g, 91% yield).

## 5.2 Product Derivatizations

### (*E*)-(3,3-Difluoroprop-1-ene-1,3-diyl)dibenzene (**6**)

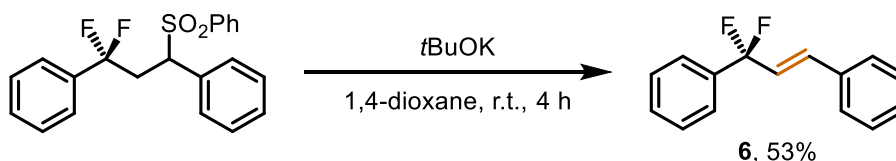

In a N<sub>2</sub> glovebox, to (1,1-difluoro-3-(phenylsulfonyl)propane-1,3-diyl)dibenzene (**5f**) (112 mg, 0.30 mmol, 1.0 equiv.) in 1,4-dioxane (3 mL) was added *t*BuOK (51 mg, 0.45 mmol, 1.5 equiv.). The reaction mixture was stirred at room temperature for 4 hours. The reaction was quenched by H<sub>2</sub>O (4 mL) and extracted by diethyl ether (3 x 5 mL). The combined organic phase was dried over anhydrous sodium sulfate, filtered, and the solvent was removed *in vacuo*. Purification by column chromatography on silica gel using petroleum ether and ethyl acetate (100:1 (v/v)) as eluent afforded **6** as a colorless liquid (36.6 mg, 53% yield).

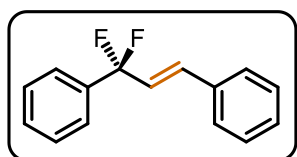

**R<sub>f</sub>** = 0.5 (petroleum ether). **NMR Spectroscopy:** <sup>1</sup>H NMR (600 MHz, CDCl<sub>3</sub>) δ 7.61 – 7.54 (m, 2H), 7.49 – 7.44 (m, 3H), 7.42 (d, *J* = 7.4 Hz, 2H), 7.39 – 7.29 (m, 3H), 6.84 (d, *J* = 16.1 Hz, 1H), 6.51 – 6.41 (m, 1H). <sup>19</sup>F NMR (565 MHz, CDCl<sub>3</sub>) δ -90.72 (d, *J* = 9.6 Hz, 2F). <sup>13</sup>C NMR (151 MHz, CDCl<sub>3</sub>) δ 190.9, 145.2, 138.3, 135.0, 133.0, 130.7, 129.1,

128.8, 128.7, 128.6, 122.3. **HRMS (ESI)** ( $m/z$ ):  $[M+Na]^+$  calcd for  $C_{15}H_{12}F_2Na^+$ , 253.0799; found 253.0800.

**(1,1-Difluoro-3-(phenylsulfonyl)butane-1,3-diyl)dibenzene (7)**

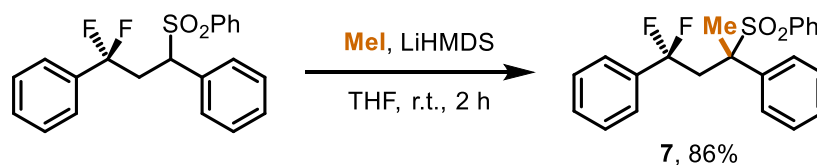

To a 25 mL oven dried round bottomed flask equipped with a magnetic stir bar was added (1,1-difluoro-3-(phenylsulfonyl)propane-1,3-diyl)dibenzene (**5f**) (372 mg, 1 mmol, 1.0 equiv.) in dry THF (10 mL) under a nitrogen atmosphere and cooled to 0 °C, then LiHMDS (1.00 M in THF, 2.0 mL) was added dropwise. After 15 minutes, a solution of methyl iodide (187  $\mu$ L, 3 mmol, 3.0 equiv.) in dry THF (2 mL) was added. The mixture was stirred at room temperature for 2 hours. The reaction was quenched by saturated aqueous  $NH_4Cl$  (10 mL) and extracted by EtOAc (3 x 10 mL). The combined organic phase was dried over anhydrous sodium sulfate, filtered, and the solvent was removed *in vacuo*. Purification by column chromatography on silica gel using petroleum ether and ethyl acetate (10:1 (v/v)) as eluent afforded **7** as a white solid (322 mg, 86% yield).

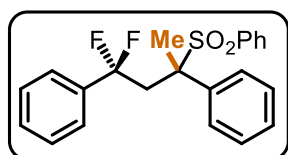

$R_f$  = 0.2 (petroleum ether/EtOAc 10:1 (v/v)). **NMR Spectroscopy:**  $^1H$  NMR (600 MHz,  $CDCl_3$ )  $\delta$  7.49 (d,  $J$  = 6.5 Hz, 1H), 7.34 (s, 5H), 7.31 (d,  $J$  = 7.2 Hz, 2H), 7.27 (d,  $J$  = 7.7 Hz, 3H), 7.24 – 7.15 (m, 4H), 3.62 – 3.52 (m, 1H), 3.20 – 3.09 (m, 1H), 1.93 (s, 3H).  $^{19}F$  NMR (565 MHz,  $CDCl_3$ )  $\delta$  -87.62 (ddd,  $J$  = 243.8, 26.2, 9.4 Hz, 1F), -94.07 (ddd,  $J$  = 243.7, 22.0, 6.2 Hz, 1F).  $^{13}C$  NMR (151 MHz,  $CDCl_3$ )  $\delta$  138.0 (t,  $J$  = 25.9 Hz), 134.9, 134.0, 133.7, 130.7, 130.0, 128.7, 128.6, 128.6, 128.3, 127.9, 124.7 (t,  $J$  = 6.3 Hz), 122.3 (t,  $J$  = 249.3 Hz), 68.3, 41.2 (t,  $J$  = 26.5 Hz), 19.7. **HRMS (ESI)** ( $m/z$ ):  $[M+Na]^+$  calcd for  $C_{22}H_{20}F_2O_2SNa^+$ , 409.1044; found 409.1051.

**((1*R*,2*S*)-1-Fluoro-2-(phenylsulfonyl)cyclopropane-1,2-diyl)dibenzene (8)**

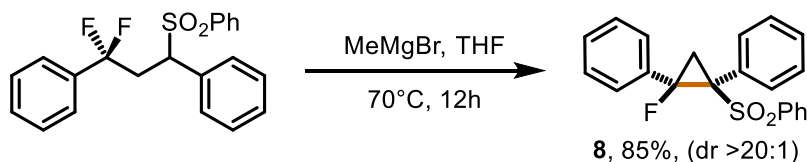

To a 10 mL Schlenk tube with a magnetic stir bar was added (1,1-difluoro-3-(phenylsulfonyl)propane-1,3-diyl)dibenzene (**5f**) (224 mg, 0.6 mmol, 1.0 equiv.), THF (4 mL) and methyl magnesium bromide (358 mg, 3 mmol, 5.0 equiv.) under a nitrogen atmosphere. The reaction mixture was stirred at 70°C for 12 hours. Upon cooling at room temperature, the reaction was quenched with H<sub>2</sub>O (5 mL) and extracted with Et<sub>2</sub>O (3 x 5 mL). The combined organic phase was dried over anhydrous sodium sulfate, filtered, and the solvent was removed *in vacuo*. Purification by column chromatography on silica gel using petroleum ether and ethyl acetate (10:1 (v/v)) as eluent afforded **8** as a white solid (180 mg, 85% yield).

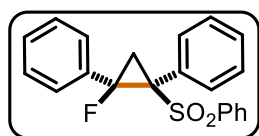

**R<sub>f</sub>** = 0.3 (petroleum ether/EtOAc 10:1 (v/v)). **NMR Spectroscopy:** <sup>1</sup>H NMR (600 MHz, CDCl<sub>3</sub>) δ 7.71 (s, 2H), 7.48 (s, 4H), 7.32 (s, 2H), 7.28 – 7.19 (m, 5H), 7.11 (d, *J* = 7.2 Hz, 2H), 2.98 – 2.88 (m, 1H), 2.20 – 2.08 (m, 1H). <sup>19</sup>F NMR (565 MHz, CDCl<sub>3</sub>) δ -143.26 – -143.40 (m, 1F). <sup>13</sup>C NMR (151 MHz, CDCl<sub>3</sub>) δ 137.9, 133.6, 130.6, 130.1, 130.1, 129.8, 129.8, 129.3, 129.2, 128.4, 128.3, 83.5 (d, *J* = 226.4 Hz), 56.7 (d, *J* = 15.7 Hz), 29.9, 22.0 (d, *J* = 10.6 Hz). **HRMS (ESI)** (*m/z*): [M+Na]<sup>+</sup> calcd for C<sub>21</sub>H<sub>17</sub>FO<sub>2</sub>SN<sup>+</sup>, 375.0825; found 375.0830.

#### 4,4-Difluoro-2,4-diphenylbutanoic acid (**9**)

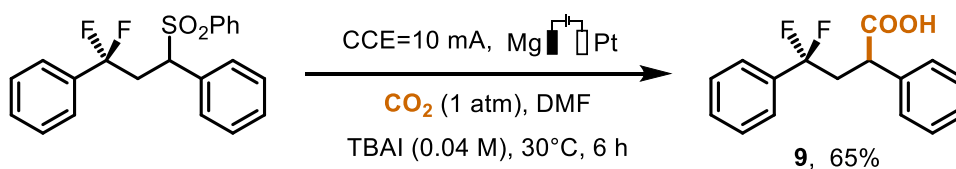

To an undivided cell equipped with a magnesium anode (1 cm x 1 cm) and a platinum cathode (1 cm x 1 cm) were added a stirring bar, TBAI (443 mg, 1.2 mmol, 1.2 equiv.) and (1,1-difluoro-3-(phenylsulfonyl)propane-1,3-diyl)dibenzene (**5f**) (372 mg, 1 mmol, 1.0 equiv.). All of the starting materials were dissolved in anhydrous DMF (12.5 mL) under a CO<sub>2</sub> atmosphere. The reaction mixture under 10 mA of constant current was

applied for 6 hours at 30 °C. During the electrolysis, CO<sub>2</sub> was supplied by a balloon. After electrolysis, the reaction mixture was acidified with 1 M HCl (40 mL) and extracted with brine (2 x 40 mL). The aqueous phase was extracted with EtOAc (60 mL). The combined organic phase was dried over anhydrous sodium sulfate, filtered, and the solvent was removed *in vacuo*. Purification by column chromatography on silica gel using petroleum ether and ethyl acetate (5:1 (v/v)) as eluent afforded **9** as a white solid (179 mg, 65% yield).

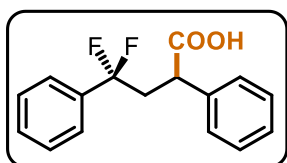

**R<sub>f</sub>** =0.3 (petroleum ether/EtOAc 5:1 (v/v)). **NMR**

**Spectroscopy:** <sup>1</sup>H NMR (600 MHz, CDCl<sub>3</sub>) δ 7.46 (d, *J* = 6.2 Hz, 2H), 7.42 – 7.34 (m, 3H), 7.30 (dd, *J* = 20.5, 15.4 Hz, 5H),

3.95 (d, *J* = 6.6 Hz, 1H), 3.17 (td, *J* = 23.9, 13.8 Hz, 1H), 2.66 – 2.35 (m, 1H). <sup>19</sup>F NMR (565 MHz, CDCl<sub>3</sub>) δ -95.74 (ddd, *J* = 246.3, 19.8, 12.7 Hz, 1F), -96.38 (ddd, *J* = 246.4, 19.7, 12.2 Hz, 1F). <sup>13</sup>C NMR (151 MHz, CDCl<sub>3</sub>) δ 178.4, 137.8, 136.7 (t, *J* = 26.2 Hz), 130.2, 129.1, 128.6, 128.0, 127.9, 125.1 (t, *J* = 6.0 Hz), 122.0 (t, *J* = 243.6 Hz), 45.7, 42.6 (t, *J* = 27.6 Hz). **HRMS (ESI)** (*m/z*): [M+Na]<sup>+</sup> calcd for C<sub>16</sub>H<sub>14</sub>F<sub>2</sub>O<sub>2</sub>Na<sup>+</sup>, 299.0854; found 299.0856.

## 6 Mechanistic Studies

### 6.1 UV-Vis Absorption Spectroscopic Measurements

UV-Vis absorption spectra were measured in a 1 cm quartz cuvette using a UV-2600i spectrophotometer. The association constant for three components was determined by UV-Vis measurements in DMA. The absorbance of a constant concentration of **3a** (0.15 M) with *t*BuONa (0.15 M), and an increasing volume of **1a** or **2a** was recorded. The absorption spectra shown in Figures S6 and S7.

2.0 mL **3a** anion solution (freshly prepared in situ by the deprotonation of **3a** with *t*BuONa) in cuvettes were added **1a** (0 μL, 2.30 μL, 4.30 μL and 8.30 μL) and to prepare four samples. The results were depicted as follows:

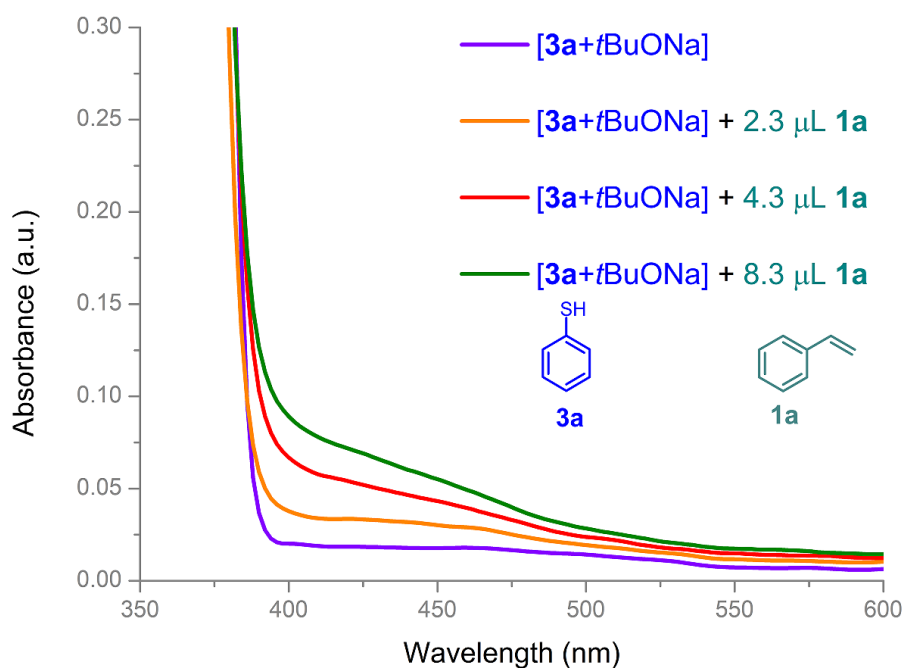

**Figure S6.** UV-Vis absorption spectra of **3a** (0.15 M in DMA) and *t*BuONa (0.15 M in DMA) in combination with increasing concentration of **1a**.

2.0 mL **3a** anion solution (freshly prepared in situ by the deprotonation of **3a** with *t*BuONa) in cuvettes were added **2a** (0  $\mu$ L, 4.40  $\mu$ L, 6.40  $\mu$ L and 14.4  $\mu$ L) and to prepare four samples. The results were depicted as follows:

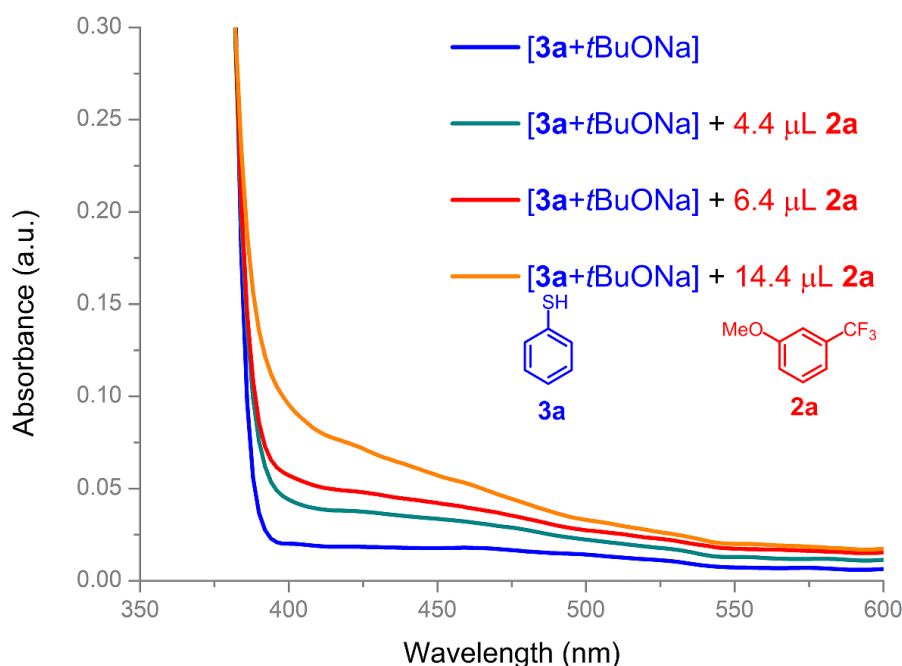

**Figure S7.** UV-Vis absorption spectra of **3a** (0.15 M in DMA) and *t*BuONa (0.15 M in DMA) in combination with increasing concentration of **2a**.

## 6.2 $^{19}\text{F}$ NMR Titration Experiments

$^{19}\text{F}$  NMR titrations were performed by the preparation of the mixture of **1p**, **3a** and *t*BuONa and the mixture of **2a**, **3a** and *t*BuONa, respectively. (Trifluoromethoxy)benzene was used as an internal standard. The total volume of the mixture was 1.0 mL, and the amount of **1p** or **2a** was kept constant at 0.15 mmol (0.15 M), while the amount of **3a** anion (freshly prepared *in situ* by the deprotonation of **3a** with *t*BuONa) was varied from 0 to 0.75 mmol (0~0.75 M). The addition of **3a** anion to the solution of **1p** resulted in a further upfield shift (Figure S8). Similar upfield shift occurs when proportionable **3a** anion was added into the solution of **2a** (Figure S9).

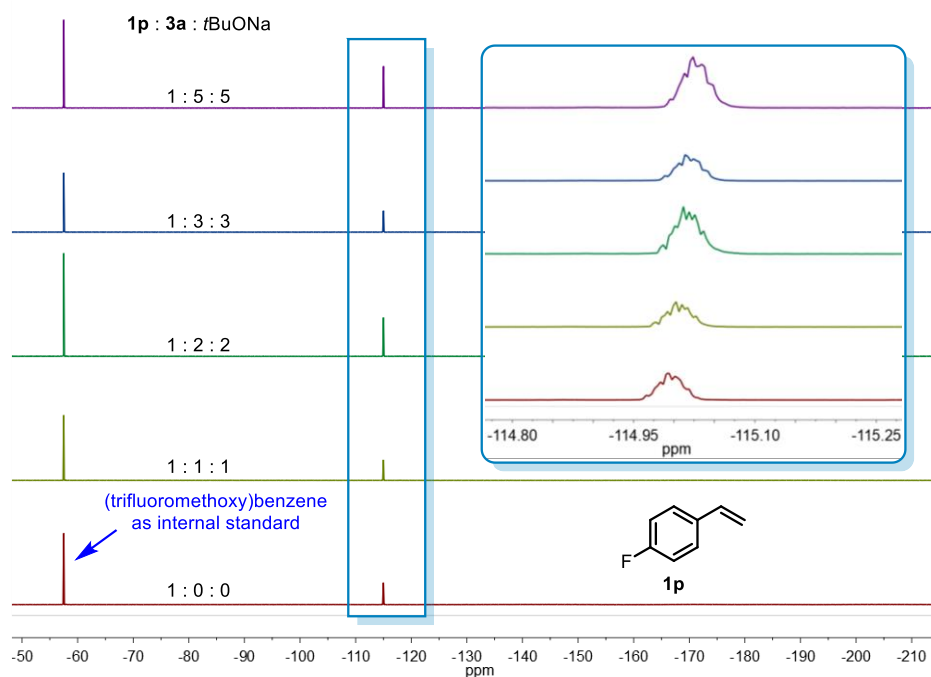

**Figure S8.**  $^{19}\text{F}$  NMR spectrum of **1x** with adding **3a** anion (565 MHz,  $\text{CDCl}_3$ ).

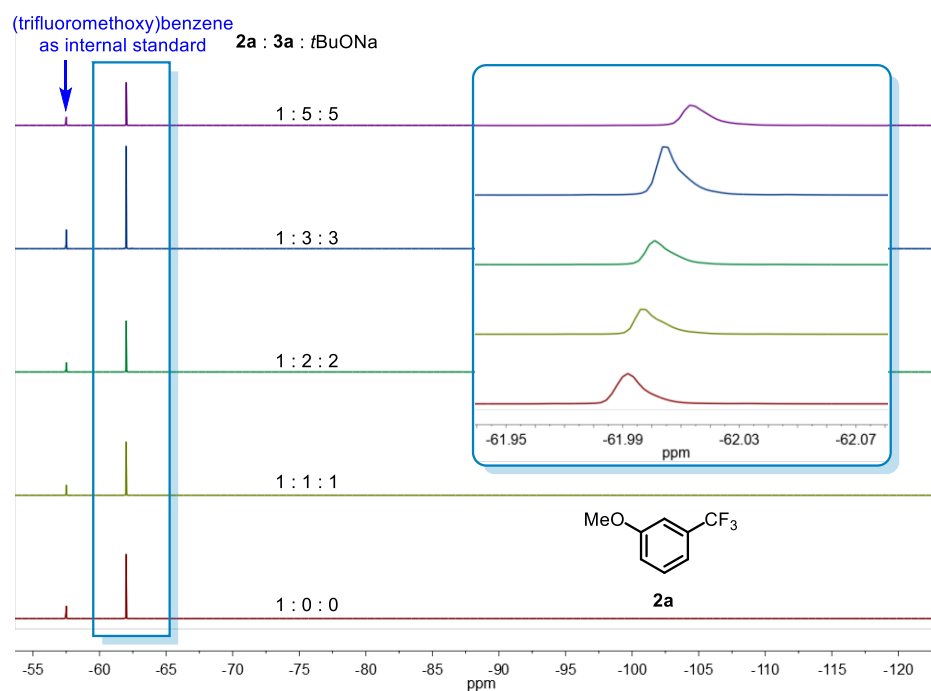

**Figure S9.**  $^{19}\text{F}$  NMR spectrum of **2a** with adding **3a** anion (565 MHz,  $\text{CDCl}_3$ ).

### 6.3 Stern-Volmer Quenching Experiment

Stern-Volmer fluorescence quenching experiments were collected on a HITACHI F-7000 spectrofluorometer at 25 °C. Parameters: data interval = 0.2 nm, scan rate = 1200 nm/min, Averaging time = 0.5 sec. The samples were measured in N-buliv quartz

cuvettes (chamber volume = 3.50 mL, H×W×D = 45.0 mm × 12.5 mm × 12.5 mm). The excitation wavelength was fixed at 375 nm, the emission light was acquired from 400 nm to 600 nm. Preparing solution of **3a** anion (0.15 M, freshly prepared in situ by the deprotonation of **3a** with *t*BuONa) with dry DMA, solution of **1a** (1.70 mg in volumetric flask of 5 mL with dry DMA, 3.2 mM) and solution of **2a** (3.0 mg in volumetric flask of 5 mL with dry DMA, 3.4 mM).

2.0 mL **3a** anion solution in cuvettes were added **1a** solution (0  $\mu$ L, 4.0  $\mu$ L, 6.0  $\mu$ L, 9.0  $\mu$ L, 10.0  $\mu$ L) and to prepare five samples **3a** anion, **3a** anion+**1a** (8.5  $\mu$ M), **3a** anion+**1a** (17.0  $\mu$ M), **3a** anion+**1a** (25.5  $\mu$ M), **3a** anion+**1a** (34.0  $\mu$ M). The results were depicted as follows:

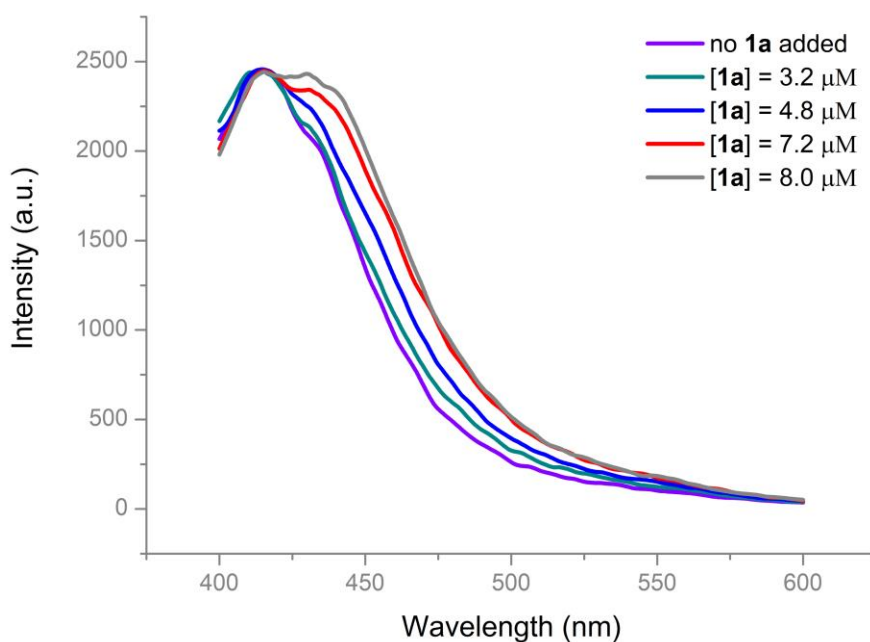

**Figure S10.** Quenching of the **3a** anion emission (0.15 M in DMA) in the presence of increasing amounts of **1a**.

2.0 mL **3a** anion solution in cuvettes were added **2a** solution (0  $\mu$ L, 5.0  $\mu$ L, 10.0  $\mu$ L, 15.0  $\mu$ L, 20.0  $\mu$ L) and to prepare five samples **3a** anion, **3a** anion+**2a** (8.5  $\mu$ M), **3a** anion+**2a** (17.0  $\mu$ M), **3a** anion+**2a** (25.5  $\mu$ M), **3a** anion+**2a** (34.0  $\mu$ M). The results were depicted as follows:



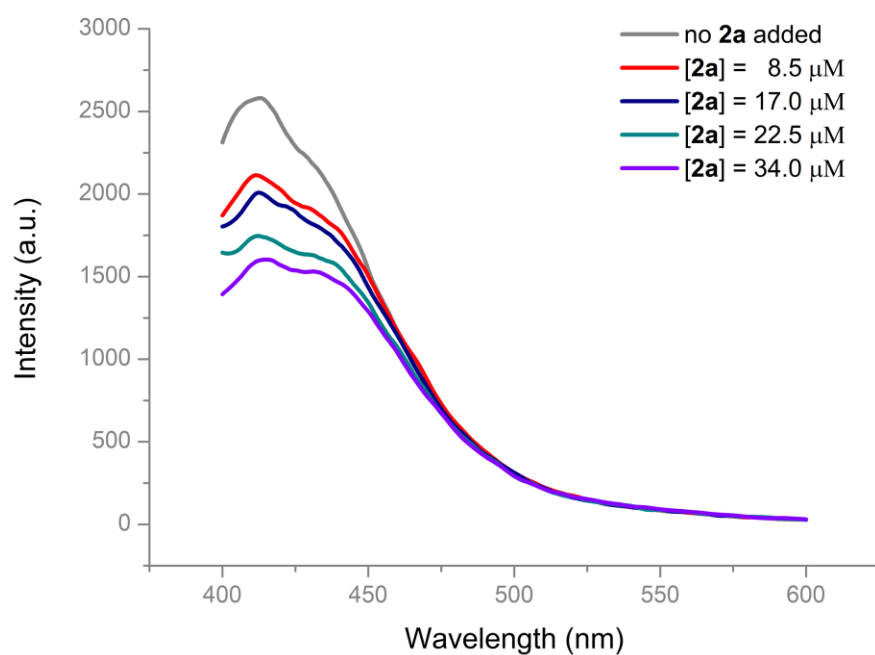

**Figure S11.** Quenching of the **3a** anion emission (0.15 M in DMA) in the presence of increasing amounts of **2a**.

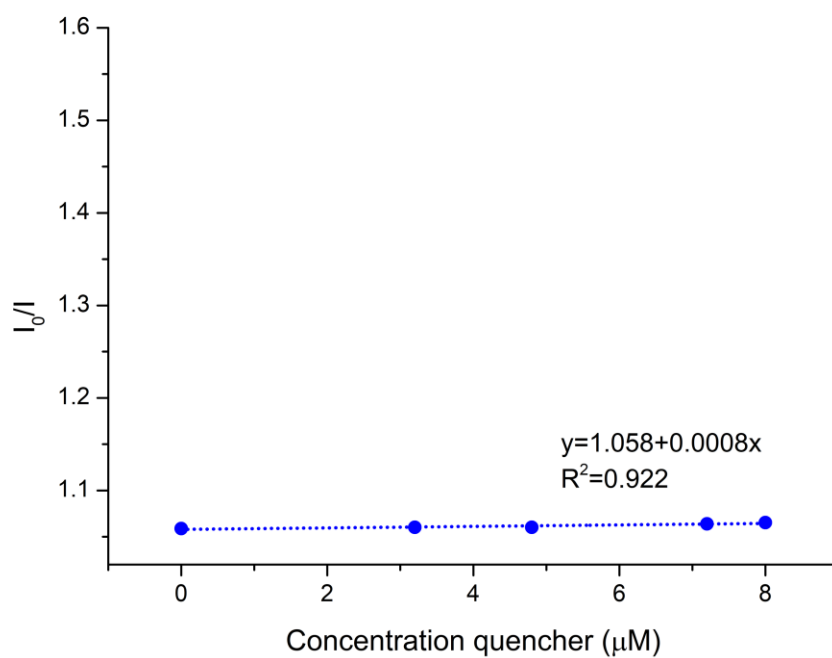

**Figure S12.** Stern-Volmer quenching plot of substrate **1a**.

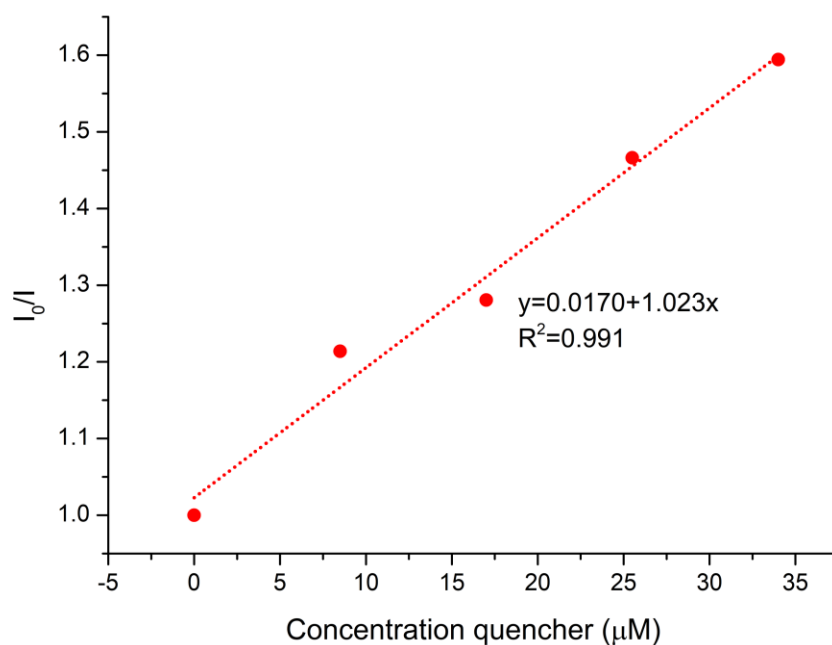

**Figure S13.** Stern-Volmer quenching plot of substrate **2a**.

#### 6.4 Light On/Off Experiment

Several standard reactions according to General Procedure A were parallelly set up on a 0.20 mmol scale and irradiated with 2 x 30 W (365 nm) LEDs at a distance of 4 cm and/or in the absence of light. Every ten minutes, one reaction was worked up and analyzed by  $^{19}\text{F}$  NMR to determine the yield of the corresponding product using trifluoromethoxybenzene as an internal standard (Figure S14). The corresponding results revealed that light is a necessary component of the reaction.

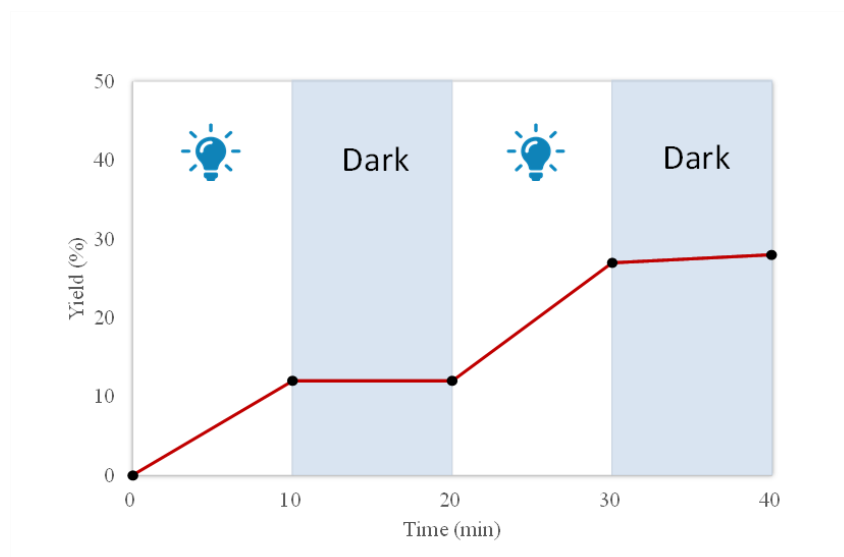

**Figure S14.** Line chart of light On/Off experiment.

## 6.5 DFT Calculations

### Computational details

All geometry optimizations were performed with the Gaussian 16 at the M06-2X level of theory. Harmonic vibrational frequency calculations were performed for all of the stationary points to confirm them as a local minima or transition structures. The solvent effects were considered by an SMD solvation model in *N,N*-dimethylacetamide solvent. All Gibbs energies reported throughout the text are in kcal mol<sup>-1</sup>.

The molecular orbital diagram was conducted at M06-2X-D3 level of theory in *N,N*-dimethylacetamide solvent.

### DFT calculations of EDA between PhCF<sub>3</sub> and PhS<sup>-</sup> (or styrene and PhS<sup>-</sup>)

DFT calculations are preformed to illuminate the formation of EDA II (PhCF<sub>3</sub> and PhS<sup>-</sup>) or EDA III (styrene and PhS<sup>-</sup>). The energy gap of benzotrifluoride (**2g**) between HOMO (-8.6 eV) and LUMO (0.2 eV) was calculated to be 8.8 eV. The energy gap of thiophenol (**3a**) anion between HOMO (-5.3 eV) and LUMO (0.4 eV) was calculated to be 5.7 eV. The energy gap of styrene (**1a**) between HOMO (-7.7 eV) and LUMO (0.4 eV) was calculated to be 8.1 eV. The high energy gap led to the difficulty in absorbing the visible light for these three compounds. By comparison, the EDA II between **2g** and **3a** anion displayed a reduced HOMO-LUMO gap with 5.1 eV (HOMO

-5.0 eV, LUMO -0.1 eV). The reduced HOMO-LUMO gap might arise from the electron donation from HOMO of **3a** anion to the LUMO of **2g**. Since **1a** may also interact with **3a** anion, the possibility of the formation of EDA III between **1a** and **3a** anion was also calculated. A reduced HOMO-LUMO gap was obtained with 4.9 eV (HOMO -5.1 eV, LUMO -0.2 eV). Consequently, both of the reduced HOMO-LUMO gaps suggest the formation of EDA II complex and EDA III complex, which is consistent with the experiment data (see Figure S15 and Figure S16).

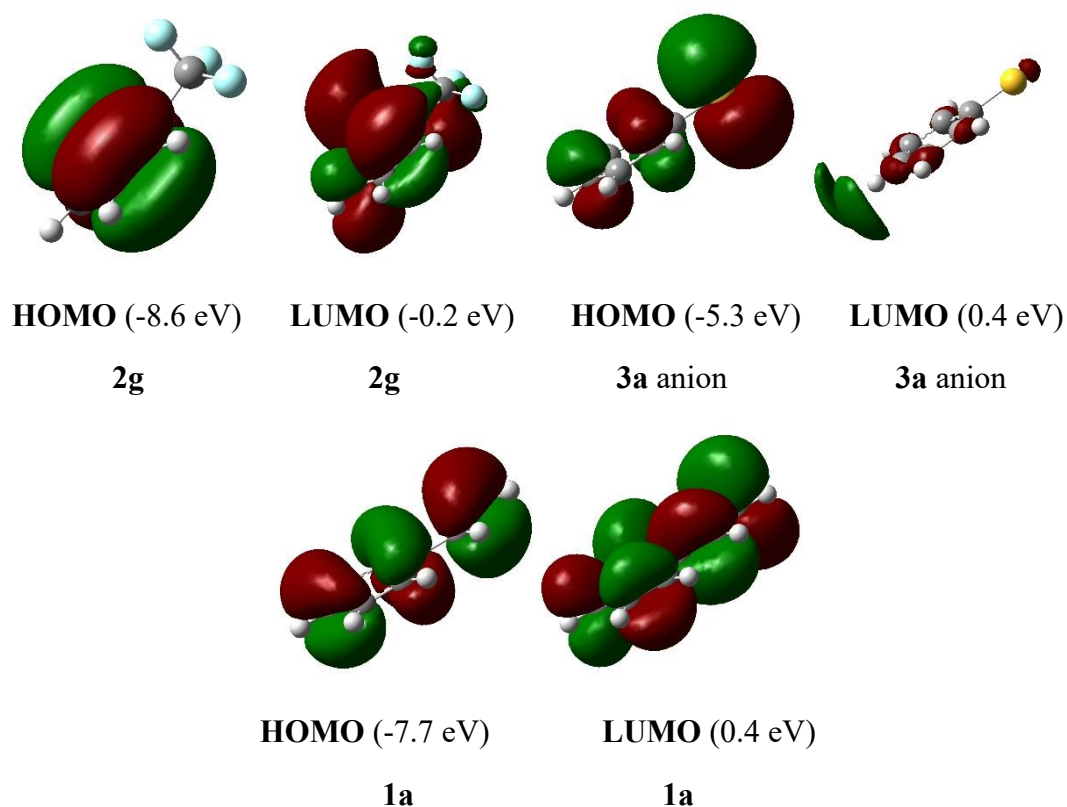

**Figure S15:** The HOMO and LUMO energy of **2g**, **3a** anion and **1a**.

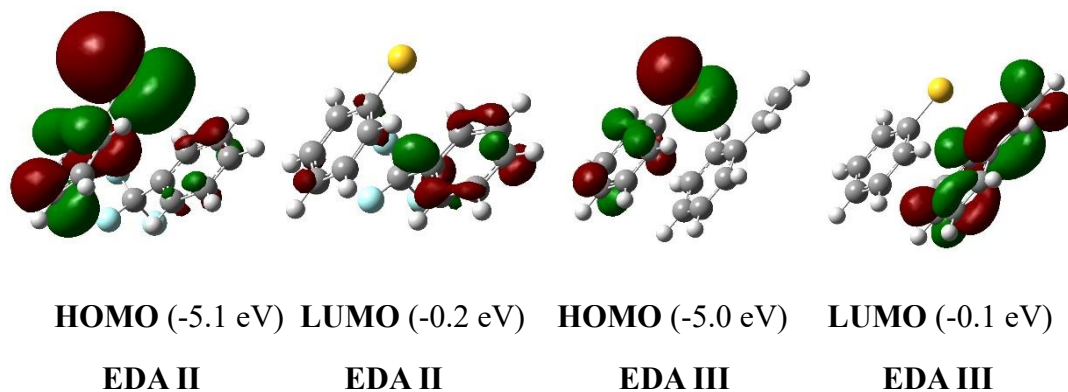

**Figure S16:** The HOMO and LUMO energy possible EDA.

#### DFT calculations of Gibbs free energy

As shown in Scheme 5e, **1a**, **3a** anion were used as model substrate. Thermodynamically, the relationship between EDA II and EDA III in the system is studied by Gibbs free energy.

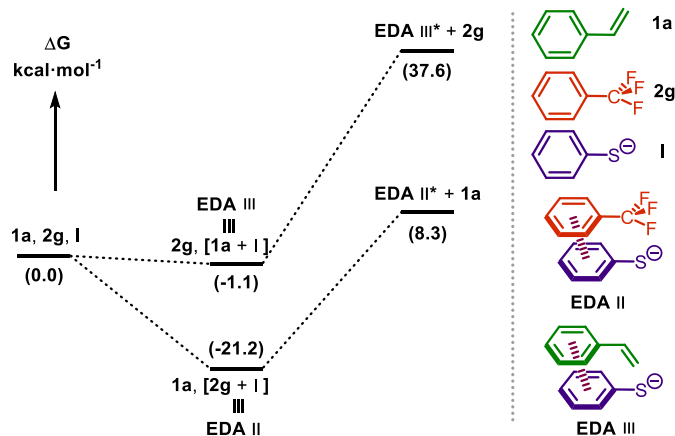

Figure 17. Computed relative free energies for complex EDA II and EDA III.

#### DFT calculation Electronic Energy, Gibbs free energy, and frequencies (Table S7)

| Compounds       | Electronic Energy (EE) <sup>a</sup> | Gibbs free energy <sup>b</sup> | IF <sup>c</sup> |
|-----------------|-------------------------------------|--------------------------------|-----------------|
| <b>1a</b>       | -309.625052685                      | -309.522161                    | -               |
| <b>2g</b>       | -529.095377161                      | -529.014179                    | -               |
| <b>I</b>        | -575.269278777                      | -575.202542                    | -               |
| <b>EDA II</b>   | -1104.41976420                      | -1104.250567                   | -               |
| <b>EDA III</b>  | -884.914665882                      | -884.726454                    | -               |
| <b>EDA II*</b>  | -1104.36857578                      | -1104.203487                   | -               |
| <b>EDA III*</b> | -884.851079067                      | -884.664784                    | -               |

<sup>a</sup>The electronic energy calculated by M06-2X-D3 in solvent. <sup>b</sup>The Gibbs energy calculated by M06-2X-D3 in solvent. <sup>c</sup>The M06-2X-D3 calculated imaginary frequencies for the transition states.

#### Geometries for all the optimized compounds

**1a**

C -2.25012700 0.26504100 0.00000000  
C -1.34820400 1.32540400 0.00000000  
C 0.01618500 1.08484600 0.00000000  
C 0.50925700 -0.22394600 0.00000000  
C -0.40608400 -1.27819700 0.00000000  
C -1.77406100 -1.03868300 0.00000000  
H -3.31570700 0.45733300 0.00000000  
H -1.71272100 2.34526000 0.00000000  
H 0.70232000 1.92278500 0.00000100  
H -0.03584600 -2.29719900 0.00000000  
H -2.46659900 -1.87129800 -0.00000100  
C 1.94902000 -0.53572700 0.00000000  
H 2.18301700 -1.59681600 0.00000200  
C 2.95029200 0.33950400 -0.00000100  
H 3.97813600 -0.00090200 0.00000000  
H 2.78974000 1.41138400 -0.00000200

**2g**

C 0.03022600 -0.00004400 -0.14718600  
C -0.65614400 -1.19230800 -0.07055100  
C -2.03695000 -1.19965500 -0.00559100  
C -2.73257100 -0.00001200 0.03416600  
C -2.03678900 1.19972500 -0.00564500  
C -0.65611400 1.19241400 -0.07052600  
H -0.11820200 -2.12787100 -0.12212500  
H -3.81400900 0.00011200 0.08854600  
H -2.57573400 2.13815200 0.02902900  
C 1.44372400 -0.00004000 0.01053600  
F 1.90019200 1.04133700 -0.54226100  
F 1.65182700 -0.00032700 1.26582800  
F 1.90013300 -1.04107000 -0.54284900  
H -0.11807500 2.12789400 -0.12220300  
H -2.57564000 -2.13822000 0.02907400

**3a anion**

C 1.56586200 1.19118100 0.00006000  
C 0.17926600 1.17546000 -0.00042300  
C -0.59439000 -0.00002600 -0.00034500  
C 0.17924200 -1.17549200 -0.00023100  
C 1.56591800 -1.19113200 -0.00000300  
C 2.27924500 -0.00000500 0.00024200  
H 2.08947900 2.14075800 0.00038700  
H -0.33432400 2.12956800 -0.00032100  
H -0.33422000 -2.12966100 -0.00049300  
H 2.08944600 -2.14076200 0.00014000  
H 3.36208800 0.00005700 0.00085300  
S -2.37020800 0.00000800 0.00022700

**EDA II**

C 2.73662200 0.51796800 1.28406600  
C 2.14548300 -0.62794700 1.80160200  
C 1.47451900 -1.50662500 0.96832200  
C 1.30511400 -1.27085800 -0.40458500  
C 1.96203100 -0.13666600 -0.89497300  
C 2.67588100 0.72341800 -0.08565300  
H 3.30055300 1.18766000 1.92133700  
H 2.22638300 -0.85451200 2.85885100  
H 1.02594100 -2.39192300 1.40352500  
H 1.94850400 0.03124700 -1.96026100  
H 3.08166200 1.63442700 -0.51034200  
C -1.09234500 0.61177800 0.02269900  
C -1.94862700 -0.08594000 -0.80023600  
C -2.82875800 -1.01047700 -0.27195200  
C -2.89043300 -1.19749200 1.10119900  
C -2.04830500 -0.46886700 1.93130400  
C -1.18113200 0.46027600 1.38747700  
H -1.89729300 0.05894500 -1.86984100

H -3.58234300 -1.91442700 1.52575900  
H -2.09294600 -0.61041500 3.00397600  
S 0.44754900 -2.41339800 -1.45398600  
C -0.40936500 1.74425800 -0.50123900  
F 0.52676400 2.07105000 0.28674900  
F 0.03035300 1.42563900 -1.64576000  
F -1.28230000 2.66696300 -0.58080500  
H -0.54799700 1.04439600 2.03955400  
H -3.50070800 -1.56086100 -0.91862500

### EDA III

C -0.12960000 -2.57645800 -0.13121000  
C -1.04605600 -2.31457800 0.88234400  
C -1.93299100 -1.25410800 0.76961800  
C -1.91864700 -0.42802500 -0.35780100  
C -0.96196100 -0.67191200 -1.34391300  
C -0.07987500 -1.73857700 -1.23772700  
H 0.55969000 -3.40715900 -0.04273100  
H -1.07595300 -2.94628100 1.76182800  
H -2.64147400 -1.06791000 1.56781100  
H -0.90138100 -0.00005600 -2.19321000  
H 0.64571100 -1.91687100 -2.02234600  
C -2.88957500 0.65997200 -0.56294800  
H -2.67692000 1.30296700 -1.41147500  
C -3.99529200 0.87434900 0.14563200  
H -4.65970700 1.69271100 -0.10262700  
H -4.27579500 0.25586100 0.99058300  
C 3.04663700 0.24283000 -0.97526000  
C 2.03400300 1.18259100 -0.86772400  
C 1.18869700 1.28262600 0.25516300  
C 1.50069800 0.38881300 1.29300700  
C 2.50334000 -0.56502800 1.20176400  
C 3.29423100 -0.64722700 0.06300900  
H 3.65003300 0.20565000 -1.87573200

H 1.87352900 1.86068900 -1.69743300  
H 0.90637600 0.42066100 2.19850400  
H 2.67720700 -1.24047900 2.03237100  
H 4.08126300 -1.38696300 -0.01546400  
S -0.11526400 2.47597400 0.37538800

### EDA II\*

C 3.80477200 -0.17902600 0.57485600  
C 3.07717700 -1.37518200 0.75918600  
C 1.93170700 -1.61880300 0.04805900  
C 1.36306500 -0.63523900 -0.81915600  
C 2.21280000 0.46592900 -1.13855100  
C 3.33711700 0.72696600 -0.40851300  
H 4.70933700 0.01829000 1.13459800  
H 3.44528600 -2.12775400 1.45014600  
H 1.38001200 -2.53340600 0.23527200  
H 1.90459500 1.16650700 -1.90242200  
H 3.94309700 1.59566600 -0.64720900  
C -1.11084700 0.13183500 0.01940700  
C -2.23218300 0.83324900 -0.60973000  
C -3.44417100 0.24232600 -0.68186400  
C -3.72520600 -0.93907800 0.05379600  
C -2.73189200 -1.46179900 0.90672600  
C -1.50448100 -0.88995600 0.99708200  
H -2.01249700 1.78611300 -1.06693900  
H -4.69426700 -1.41295000 -0.02227800  
H -2.98222200 -2.31086600 1.53101300  
S -0.23611200 -0.71899300 -1.42282200  
C -0.25761300 1.11258000 0.58240300  
F 0.67228400 0.51398500 1.19298400  
F 0.16741100 1.84586400 -0.35794300  
F -0.97738900 1.79725100 1.37927400  
H -0.75420800 -1.27917000 1.67101900  
H -4.24355900 0.70473200 -1.24908900

**EDA III\***

C -0.02322300 2.08257600 -0.82571700  
 C -0.39464600 0.98534300 -1.58833000  
 C -1.34496000 0.05698400 -1.12954400  
 C -2.07472300 0.33883400 0.12876400  
 C -1.72307000 1.55487300 0.82998100  
 C -0.70029000 2.35024700 0.39435800  
 H 0.73987300 2.76703500 -1.17474000  
 H 0.04134000 0.84582500 -2.57033200  
 H -1.79434200 -0.59936700 -1.86318200  
 H -2.31070200 1.83237000 1.69813100  
 H -0.45183300 3.24635800 0.95268700  
 C -3.21345300 -0.43368200 0.47919100  
 H -3.70082700 -0.14074800 1.40659200

C -3.66628800 -1.55904900 -0.15322800  
 H -4.51427900 -2.10165700 0.24354500  
 H -3.24936900 -1.91718400 -1.08604900  
 C 3.16882700 0.06019400 1.26013500  
 C 1.82913400 -0.26508900 1.36288000  
 C 1.08716400 -0.78069300 0.28472900  
 C 1.80377000 -0.96312200 -0.91469000  
 C 3.14371700 -0.63434800 -1.03490800  
 C 3.84201500 -0.12258500 0.05372000  
 H 3.69404000 0.45271500 2.12303800  
 H 1.32190100 -0.08808900 2.30523300  
 H 1.29369600 -1.38608600 -1.77177100  
 H 3.65478100 -0.79390600 -1.97759100  
 H 4.88948500 0.13639300 -0.03714600  
 S -0.62610100 -1.14228500 0.42922200

**6.6 Radical Clock Experiment**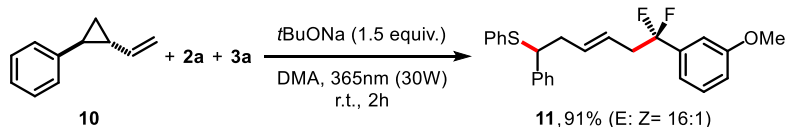

To a 20 mL oven dried screw-cap vial equipped with a magnetic stir bar was added *t*BuONa (173 mg, 1.8 mmol, 1.5 equiv.) in dry DMA (12 mL), followed by thiophenol (184  $\mu$ L, 1.8 mmol, 1.5 equiv.), 3-(trifluoromethyl)anisole (260  $\mu$ L, 1.8 mmol, 1.5 equiv.) and **10** (173 mg, 0.6 mmol, 1.0 equiv.) under a nitrogen atmosphere. The reaction mixture was stirred vigorously at room temperature and exposed to 30 W 365 nm LED for 2 hours. Then, the reaction was diluted with ethyl acetate (10 mL) and extracted with water (20 mL), saturated sodium chloride solution (2 x 30 mL), followed by reverse extraction of the mixed aqueous phase using ethyl acetate (30 mL). The combined organic layer was dried over anhydrous  $\text{MgSO}_4$ , filtered and concentrated by rotary evaporation. Purification by column chromatography on silica gel using petroleum ether and ethyl acetate (20:1 (v/v)) as eluent afforded **11** with E:Z=16:1 as a colorless oil (448 mg, 91% yield).

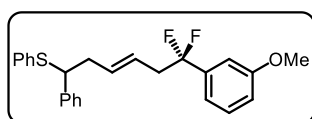

$R_f$  = 0.30 (petroleum ether/ ethyl acetate 20:1 (v/v)). **NMR**

**Spectroscopy:**  $^1\text{H}$  NMR (600 MHz,  $\text{CDCl}_3$ )  $\delta$  7.31 – 7.27 (m, 1H),

7.25 – 7.11 (m, 11H), 6.95 – 6.92 (m, 2H), 5.49 – 5.41 (m, 1H), 5.39 – 5.32 (m, 1H), 4.09 (t, *J*



= 7.3 Hz, 1H), 3.81 (s, 3H), 2.81 – 2.70 (m, 2H), 2.67 – 2.57 (m, 2H).  $^{19}\text{F}$  NMR (565 MHz,  $\text{CDCl}_3$ )  $\delta$  -94.47 (dt,  $J$  = 242.7, 15.4 Hz, 1F), -95.31 (dt,  $J$  = 242.7, 16.1 Hz, 1F).

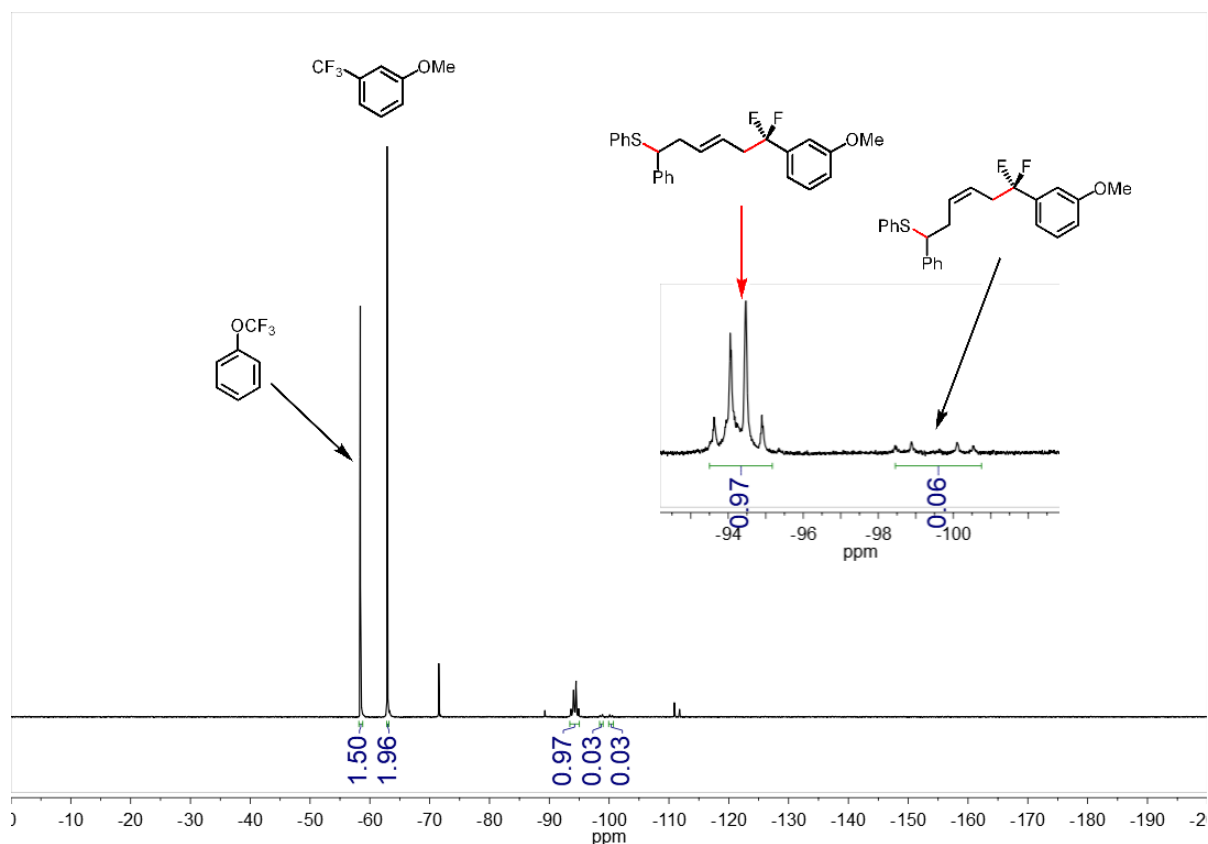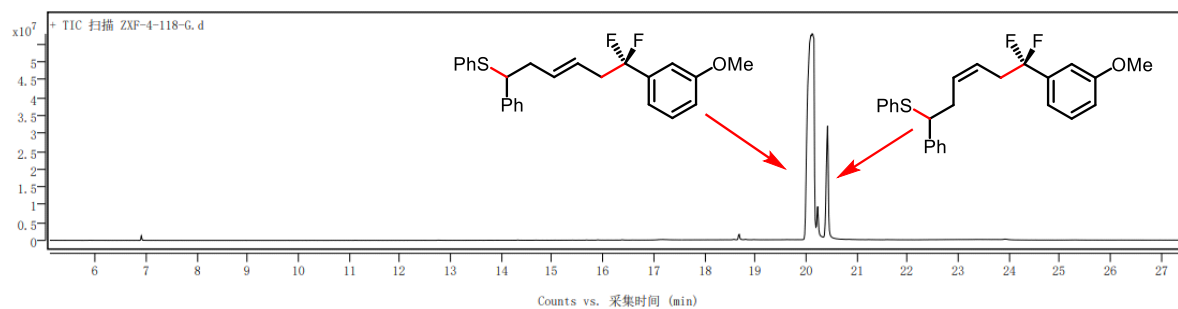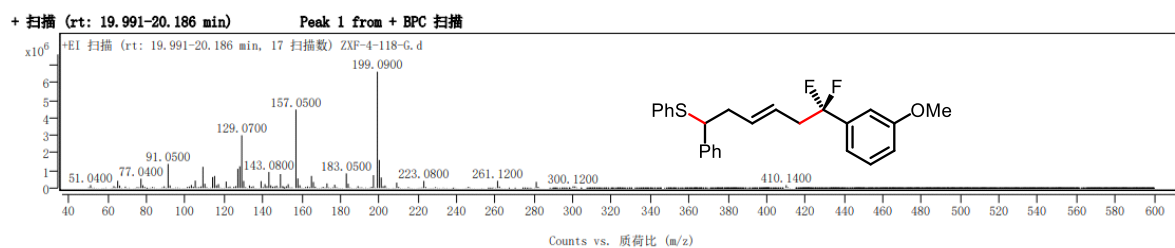

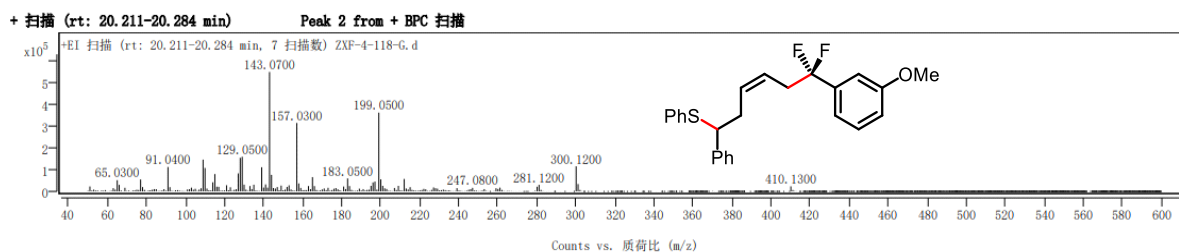

Figure 18. Detection of **11** by  $^{19}\text{F}$  NMR and GC-MS.

## 6.7 Detection of the Alkyl Radical Intermediate

### Radical trapping experiment with 1,1-Diphenylethylene

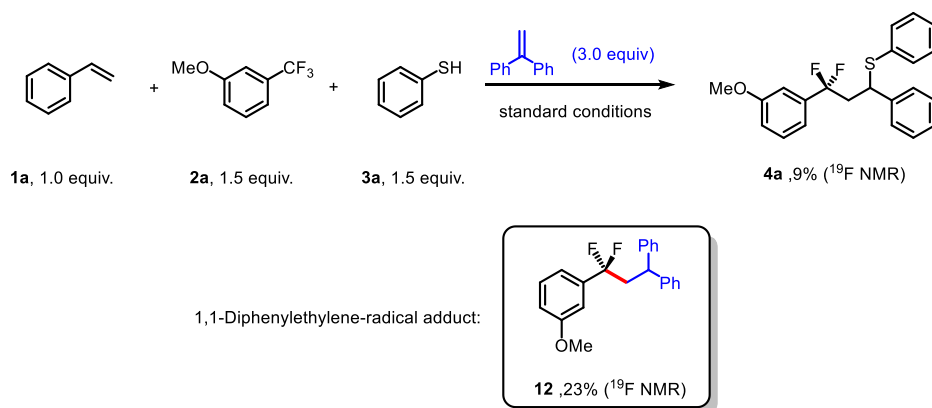

To a 2.0 mL oven dried screw-cap vial equipped with a magnetic stir bar was charged with *t*BuONa (14.5 mg, 0.15 mmol, 1.5 equiv.) in dry DMA (1.00 mL), followed by thiophenol (15.5  $\mu\text{L}$ , 0.15 mmol, 1.5 equiv.), 3-(trifluoromethyl)anisole (22.0  $\mu\text{L}$ , 0.15 mmol, 1.5 equiv.), styrene (11.5  $\mu\text{L}$ , 0.10 mmol, 1.0 equiv.) and 1,1-diphenylethylene (53.0  $\mu\text{L}$ , 0.30 mmol, 2.0 equiv.) under a nitrogen atmosphere. The reaction mixture was stirred vigorously at room temperature and exposed to 30 W 365 nm LED for 2 hours. The crude  $^{19}\text{F}$  NMR of the obtained materials showed yield of desired product and some reactive radical intermediates with (trifluoromethoxy)benzene as an internal standard.

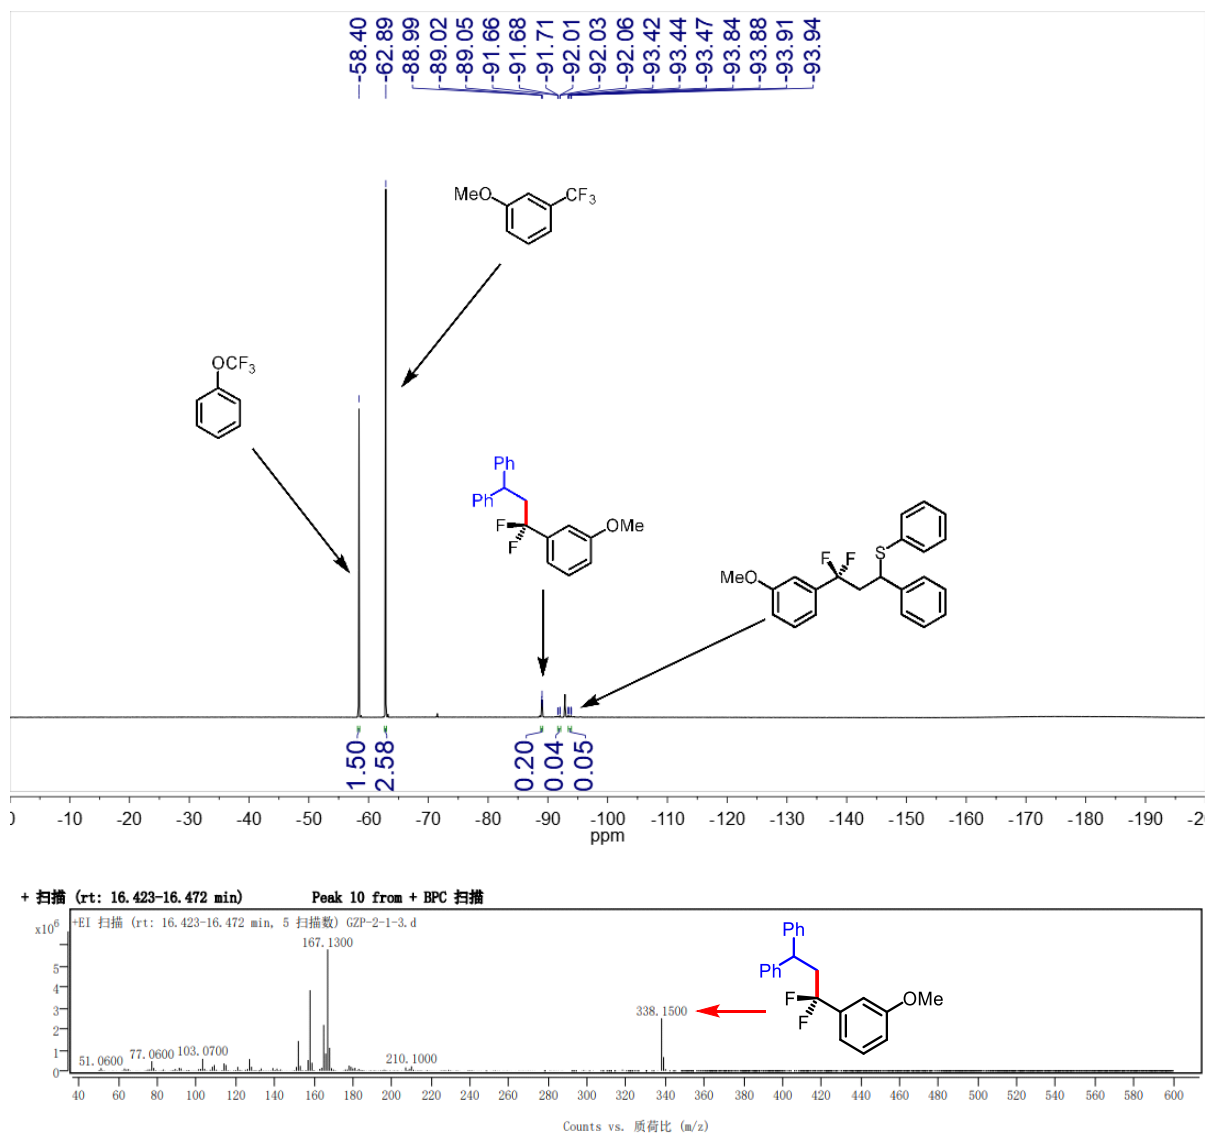

Figure 19. Detection of compounds **12** by  $^{19}\text{F}$  NMR and GC-MS.

### Radical trapping experiment with TEMPO

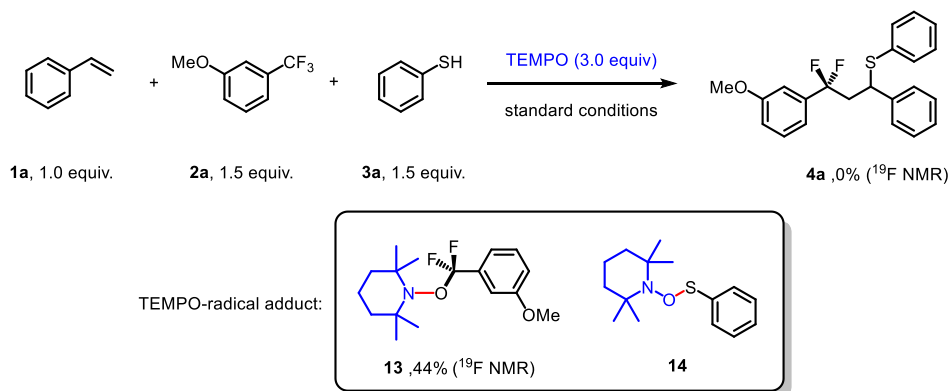

To a 2.0 mL oven dried screw-cap vial equipped with a magnetic stir bar was charged with *t*BuONa (14.5 mg, 0.15 mmol, 1.5 equiv.) in dry DMA (1.00 mL), followed by thiophenol

(15.5  $\mu\text{L}$ , 0.15 mmol, 1.5 equiv.), 3-(trifluoromethyl)anisole (22.0  $\mu\text{L}$ , 0.15 mmol, 1.5 equiv.), styrene (11.5  $\mu\text{L}$ , 0.10 mmol, 1.0 equiv.) and 2,2,6,6-Tetramethylpiperidinoxy (TEMPO) (46.9 mg, 0.30 mmol, 3.0 equiv.) under a nitrogen atmosphere. The reaction mixture was stirred vigorously at room temperature and exposed to 30 W 365 nm LED for 2 hours. The crude  $^{19}\text{F}$  NMR of the obtained materials showed some reactive radical intermediates with (trifluoromethoxy)benzene as an internal standard. GC-MS showed trapping of the reactive radical intermediates by TEMPO.

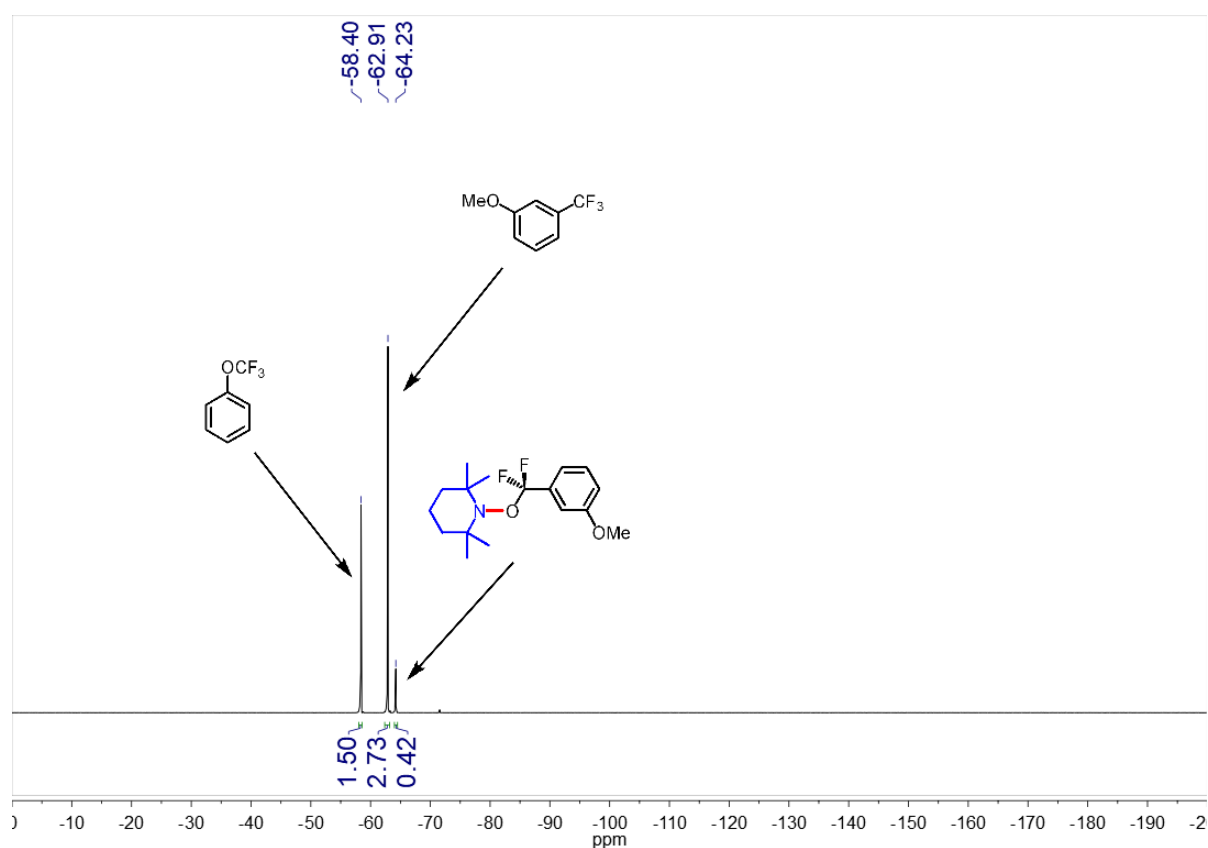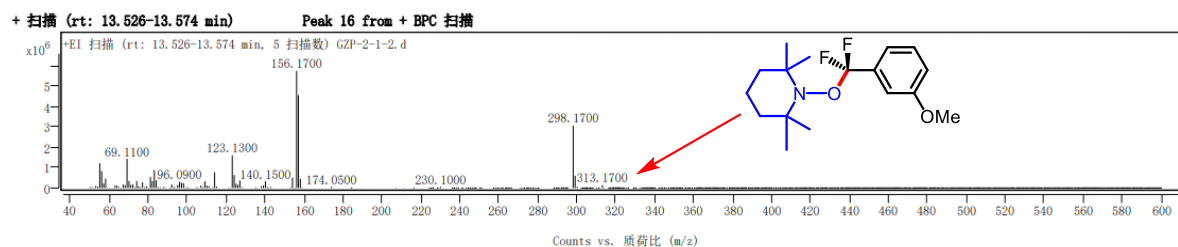

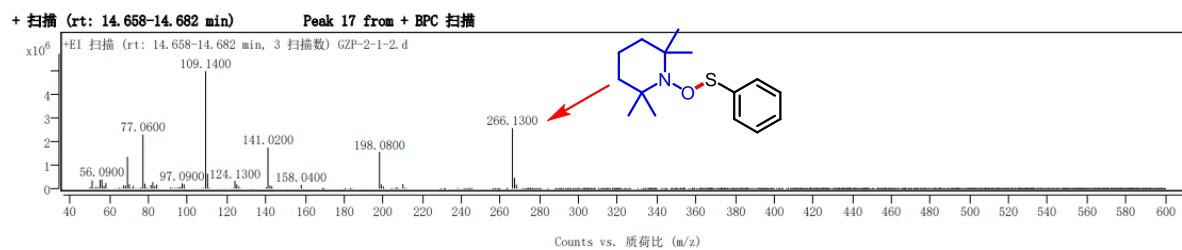

**Figure S20.** Detection of compounds **13** and **14** by <sup>19</sup>F NMR and GC-MS.

## 7 NMR Spectra for New Compounds

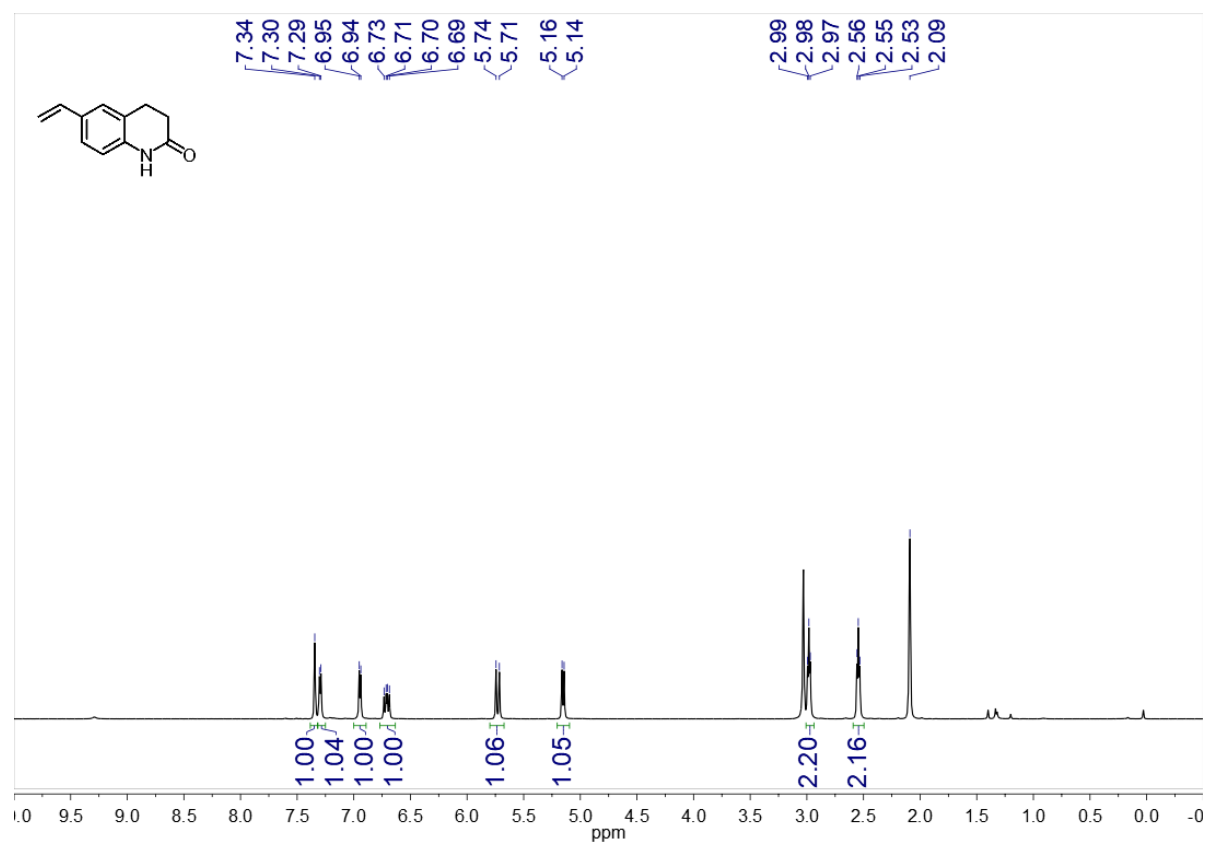

<sup>1</sup>H NMR spectrum (600 MHz, acetone-*d*<sub>6</sub>, 23 °C) of **1r**

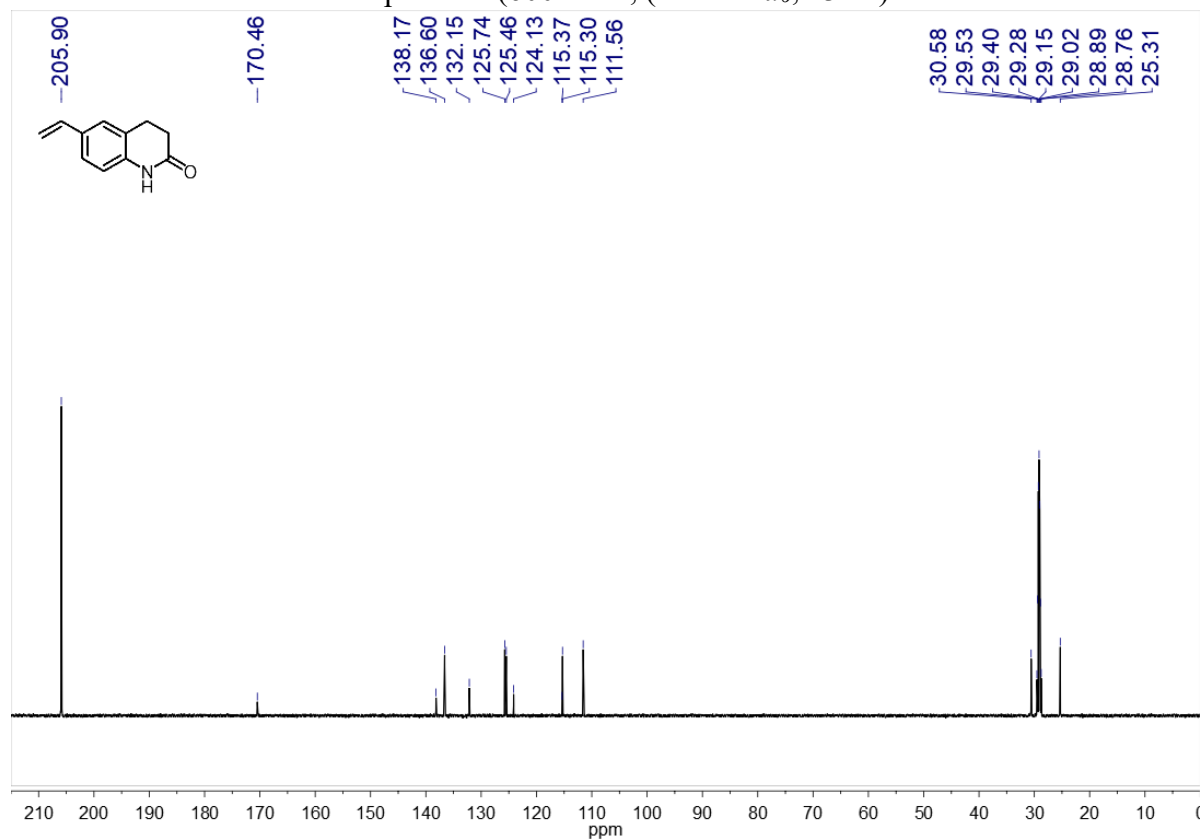

<sup>13</sup>C NMR spectrum (565 MHz, acetone-*d*<sub>6</sub>, 23 °C) of **1r**

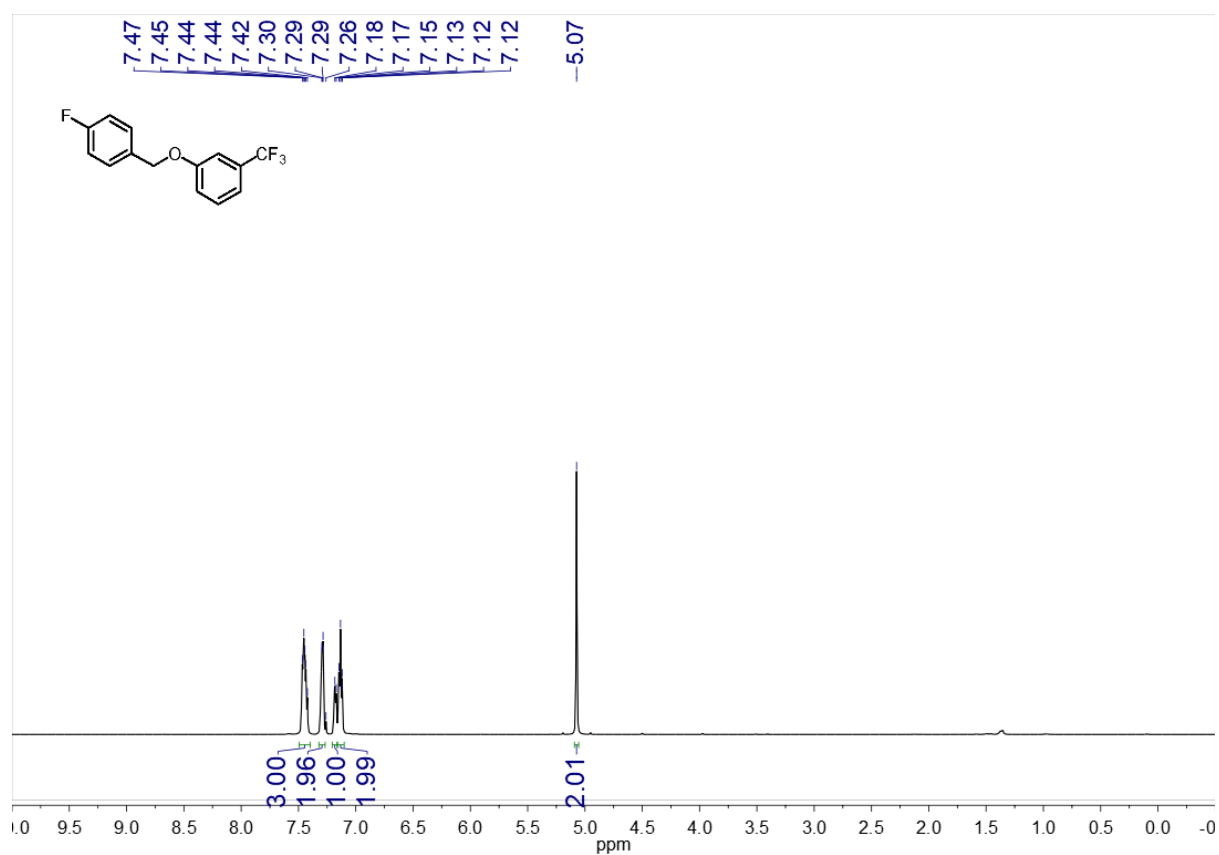

<sup>1</sup>H NMR spectrum (600 MHz, CDCl<sub>3</sub>, 23 °C) of **2i**

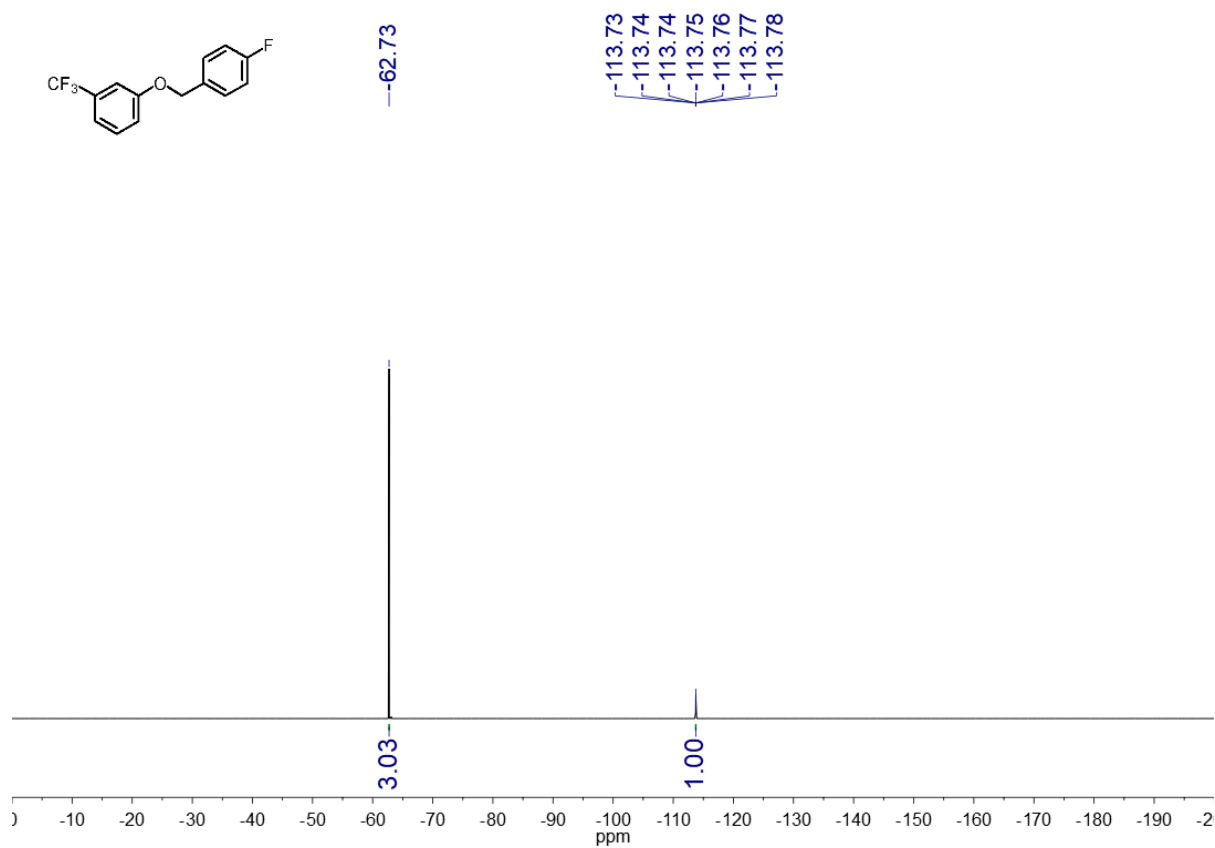

<sup>19</sup>F NMR spectrum (565 MHz, CDCl<sub>3</sub>, 23 °C) of **2i**

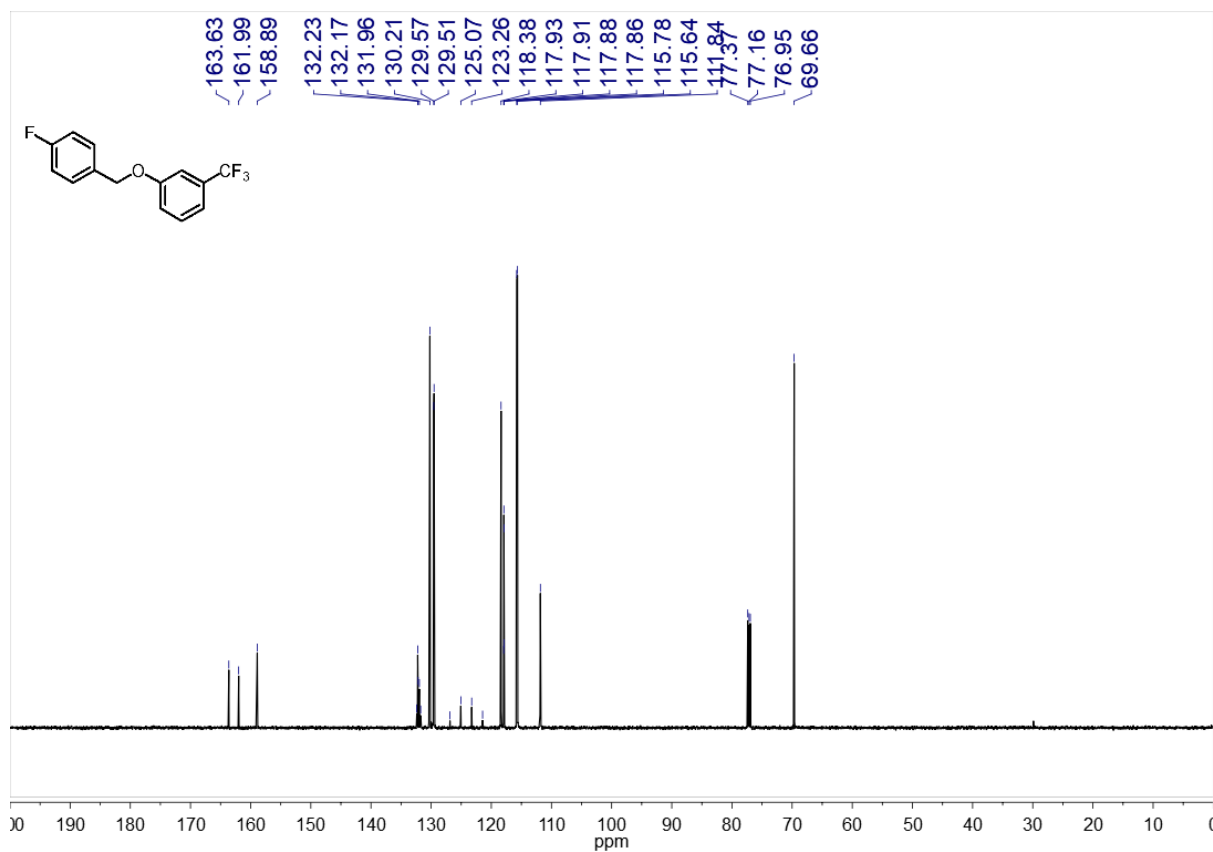

<sup>13</sup>C NMR spectrum (151 MHz, CDCl<sub>3</sub>, 23 °C) of **2i**

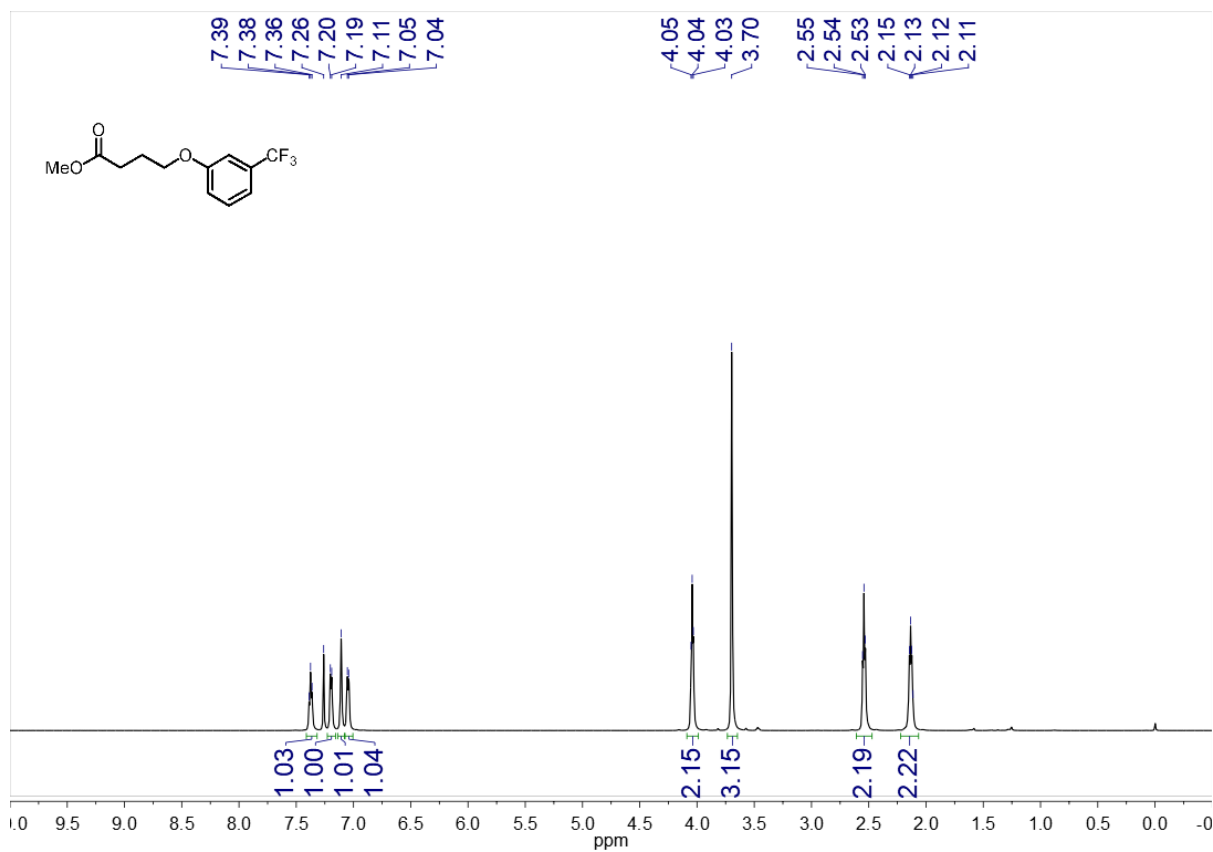

<sup>1</sup>H NMR spectrum (600 MHz, CDCl<sub>3</sub>, 23 °C) of **21**



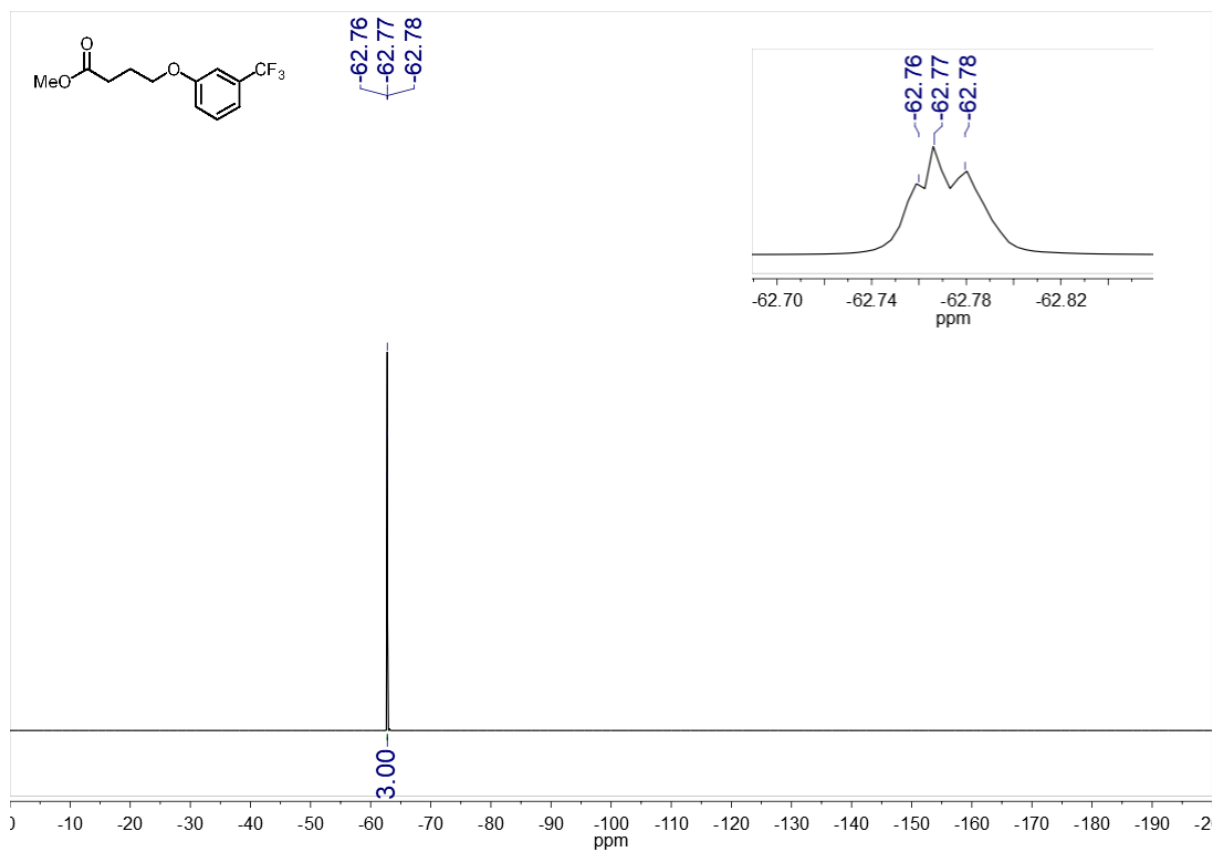

<sup>19</sup>F NMR spectrum (565 MHz, CDCl<sub>3</sub>, 23 °C) of **21**

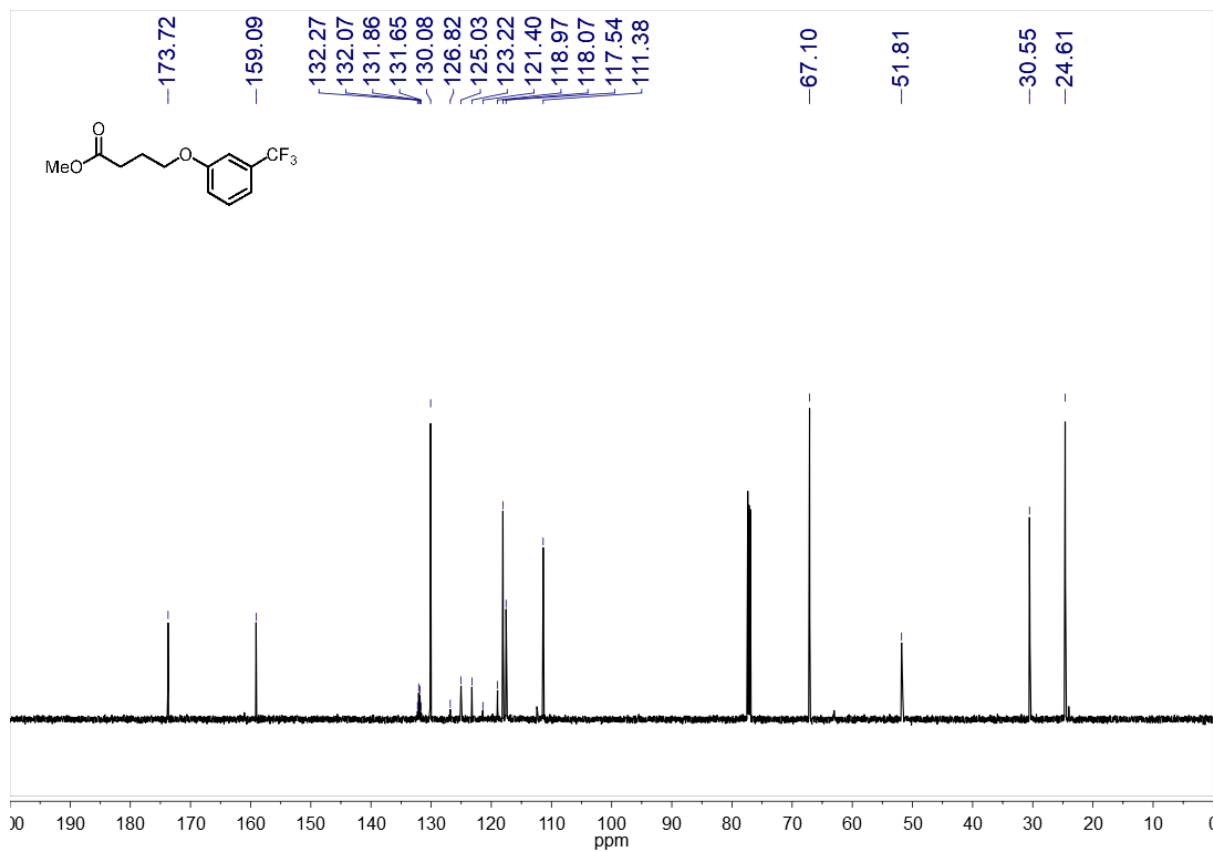

<sup>13</sup>C NMR spectrum (151 MHz, CDCl<sub>3</sub>, 23 °C) of **21**

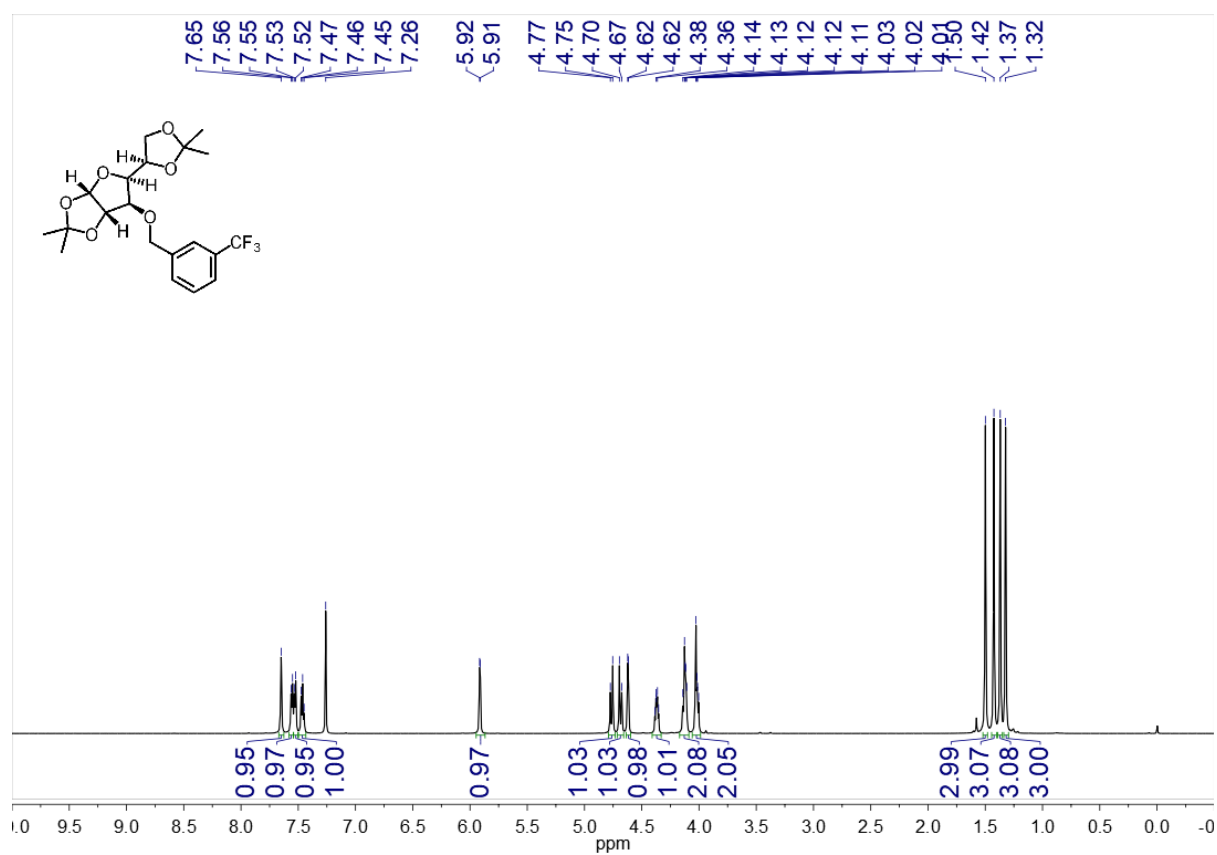

<sup>1</sup>H NMR spectrum (600 MHz, CDCl<sub>3</sub>, 23 °C) of **2o**

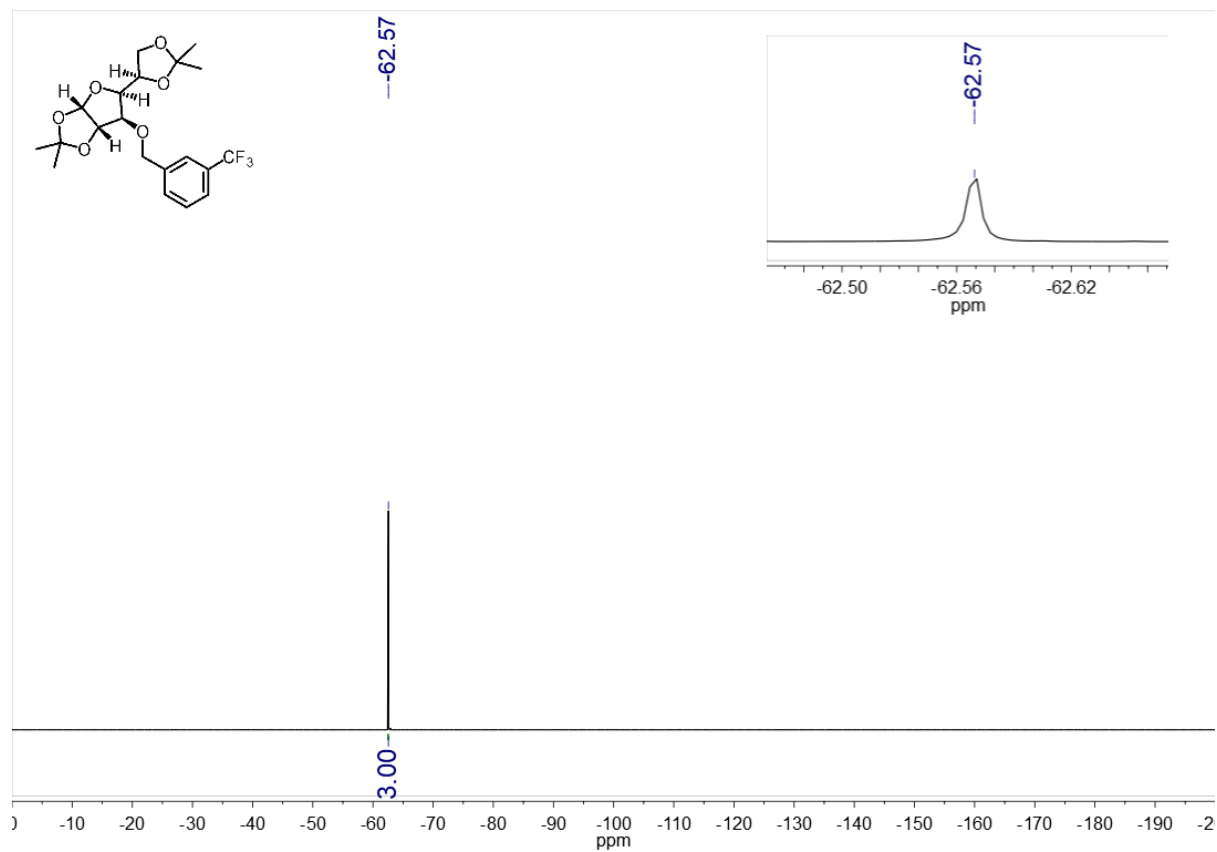

<sup>19</sup>F NMR spectrum (565 MHz, CDCl<sub>3</sub>, 23 °C) of **2o**



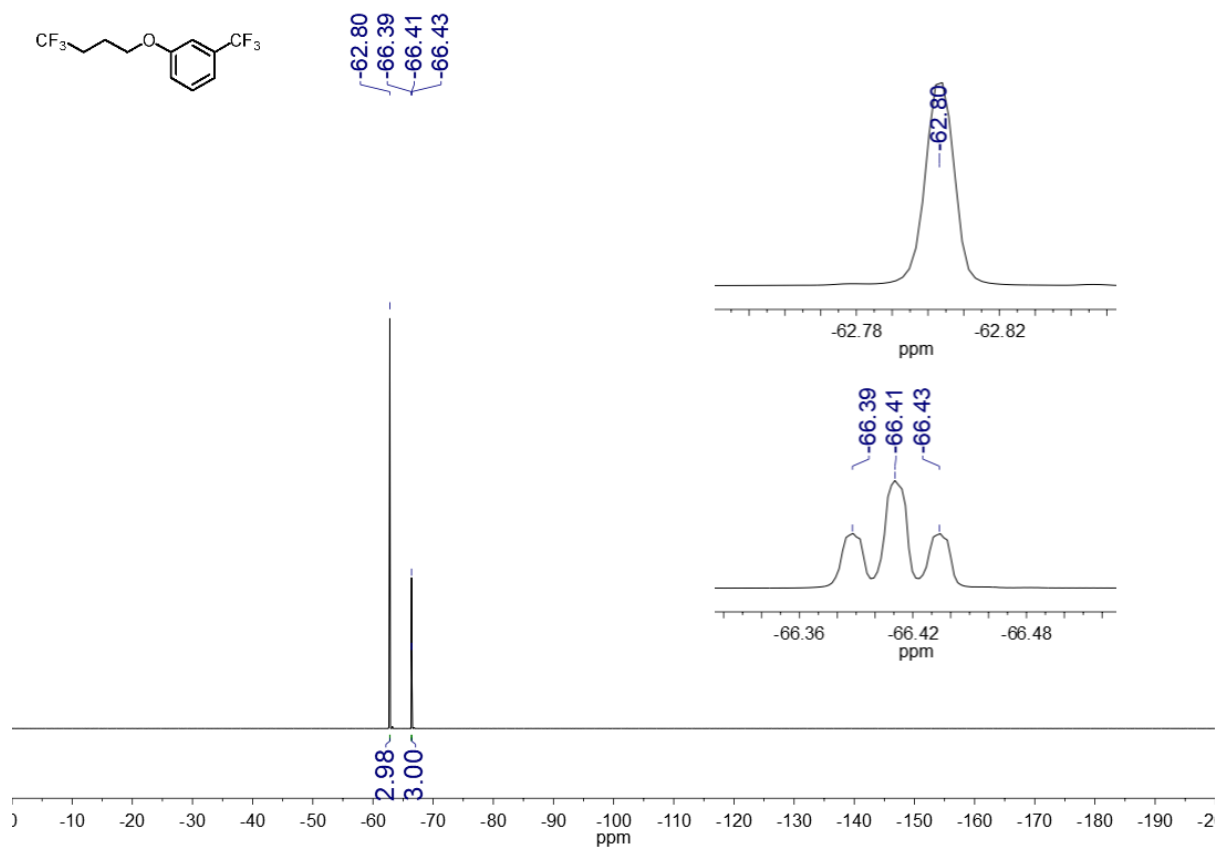

$^{19}\text{F}$  NMR spectrum (470 MHz,  $\text{CDCl}_3$ , 23 °C) of **2p**

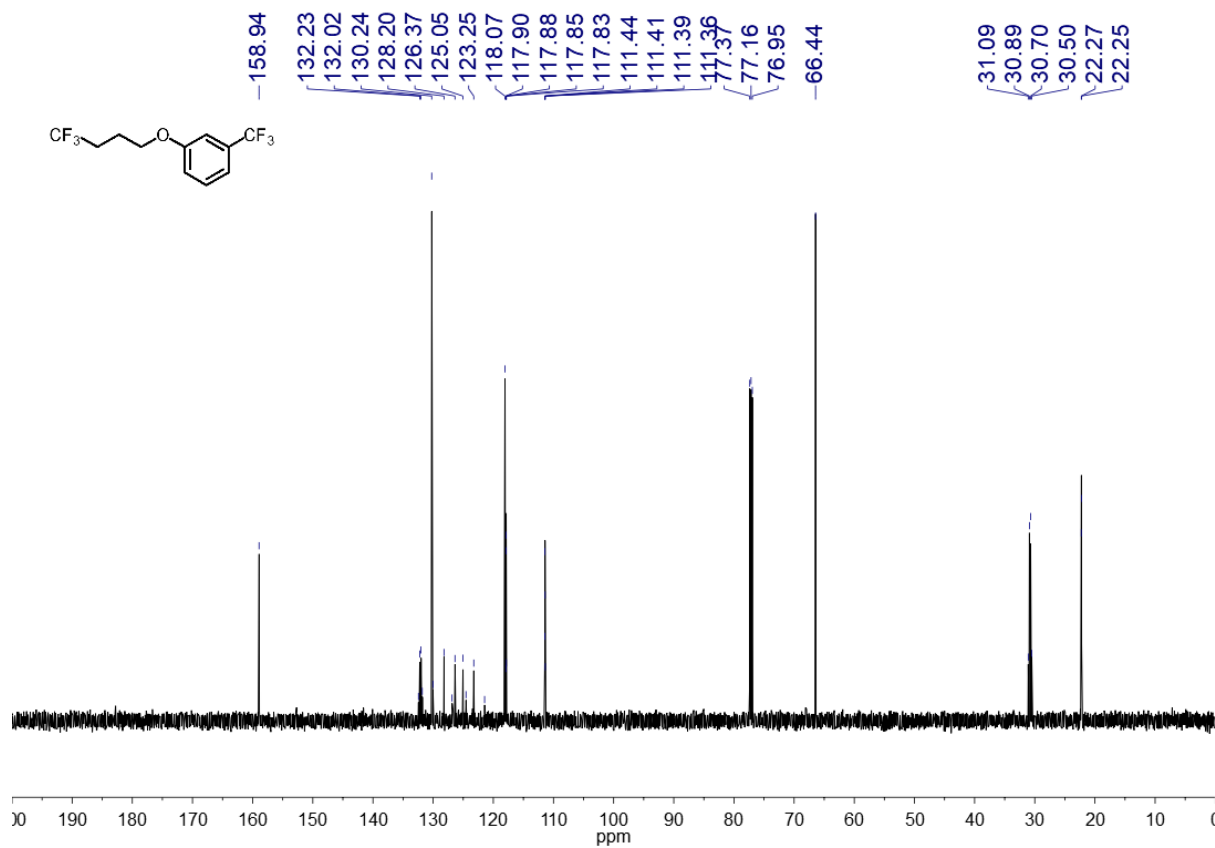

$^{13}\text{C}$  NMR spectrum (151 MHz,  $\text{CDCl}_3$ , 23 °C) of **2p**

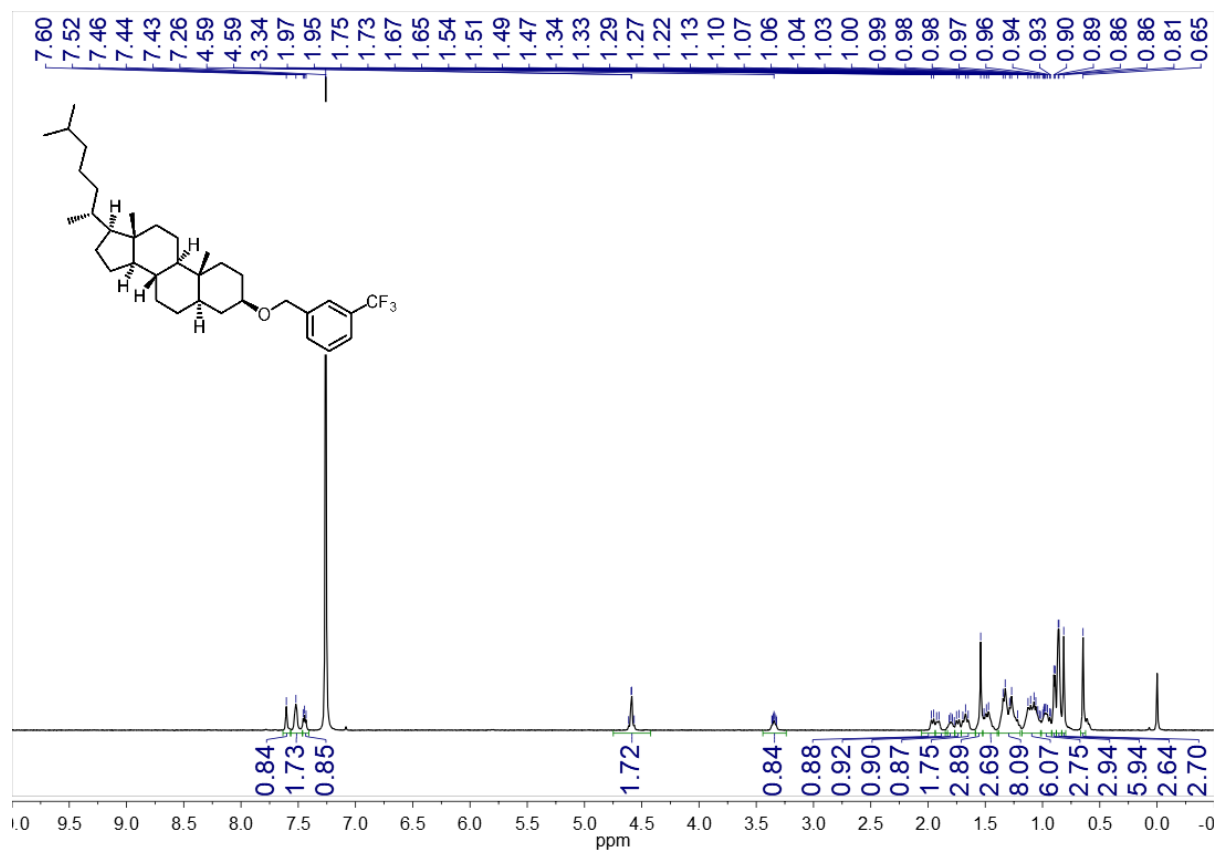

<sup>1</sup>H NMR spectrum (600 MHz, CDCl<sub>3</sub>, 23 °C) of **2q**

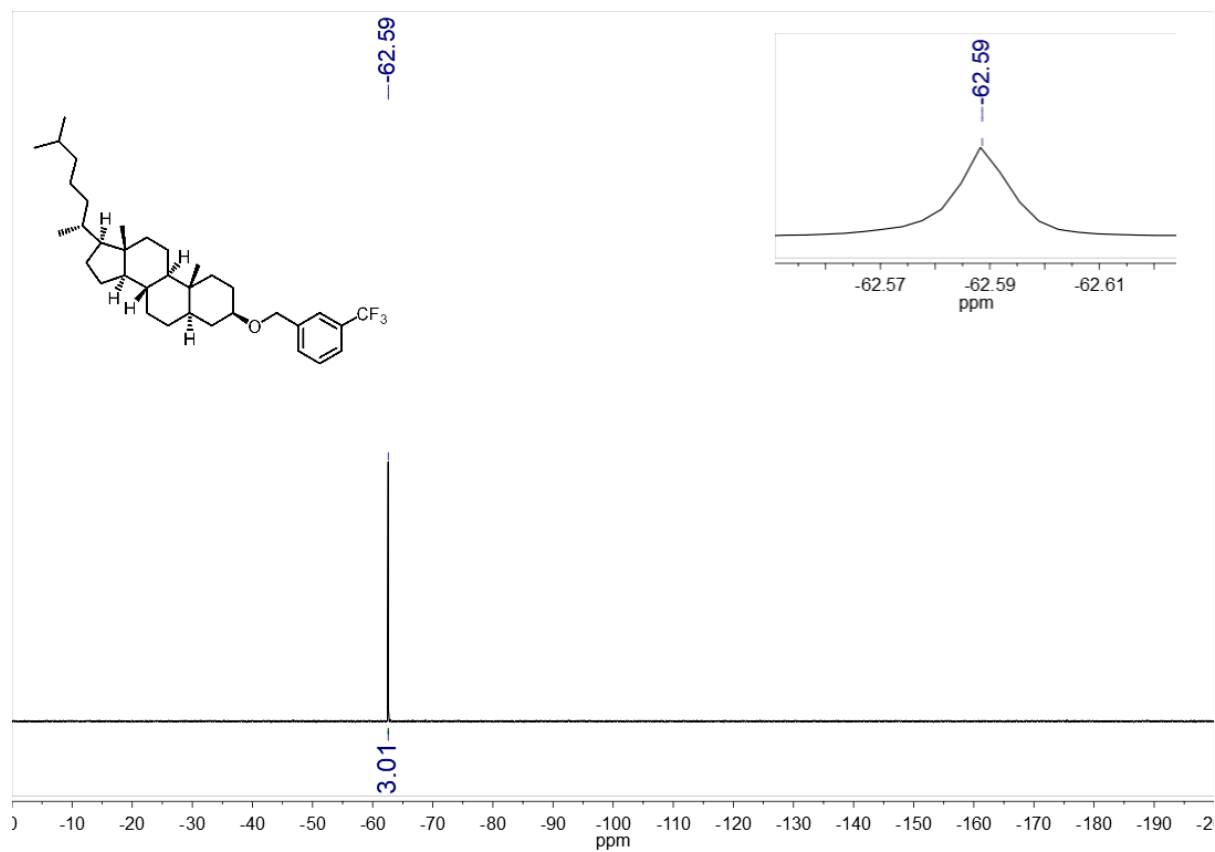

<sup>19</sup>F NMR spectrum (565 MHz, CDCl<sub>3</sub>, 23 °C) of **2q**

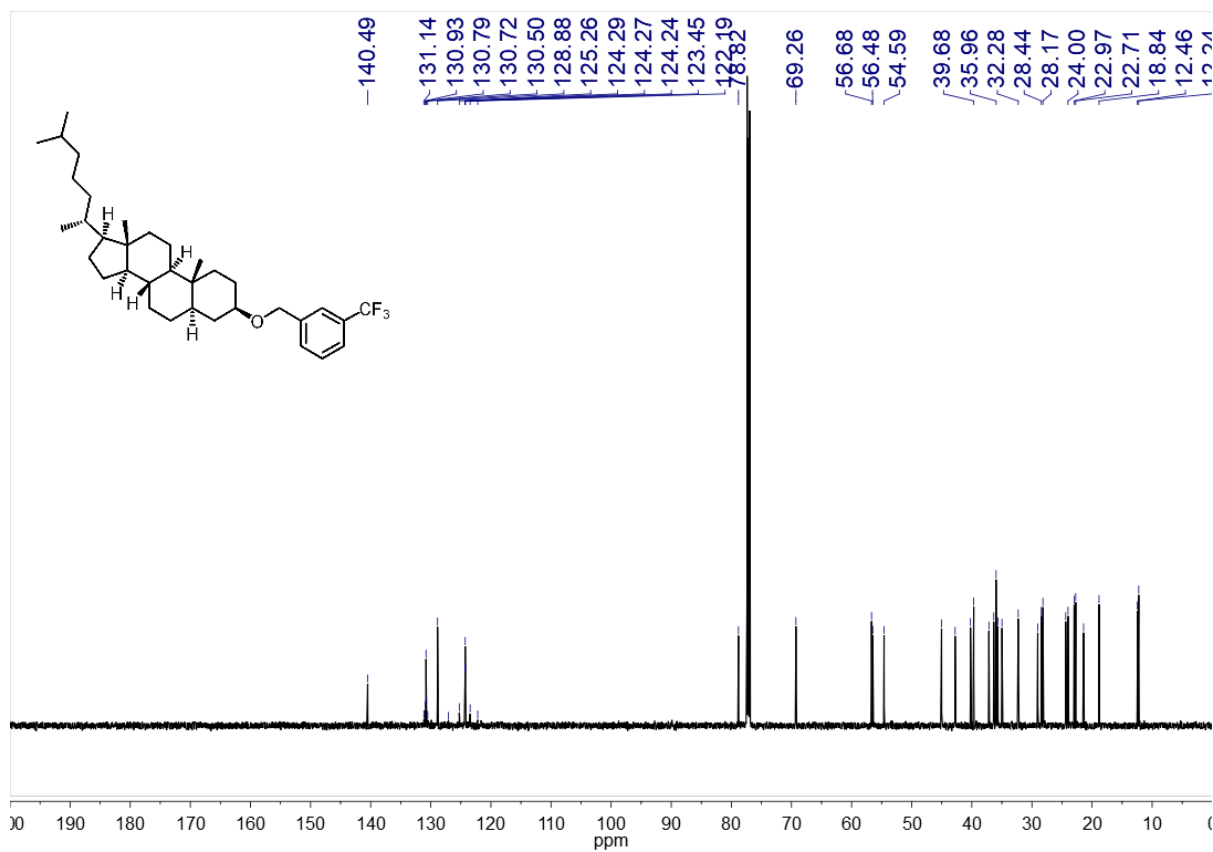

$^{13}\text{C}$  NMR spectrum (151 MHz,  $\text{CDCl}_3$ , 23 °C) of **2q**

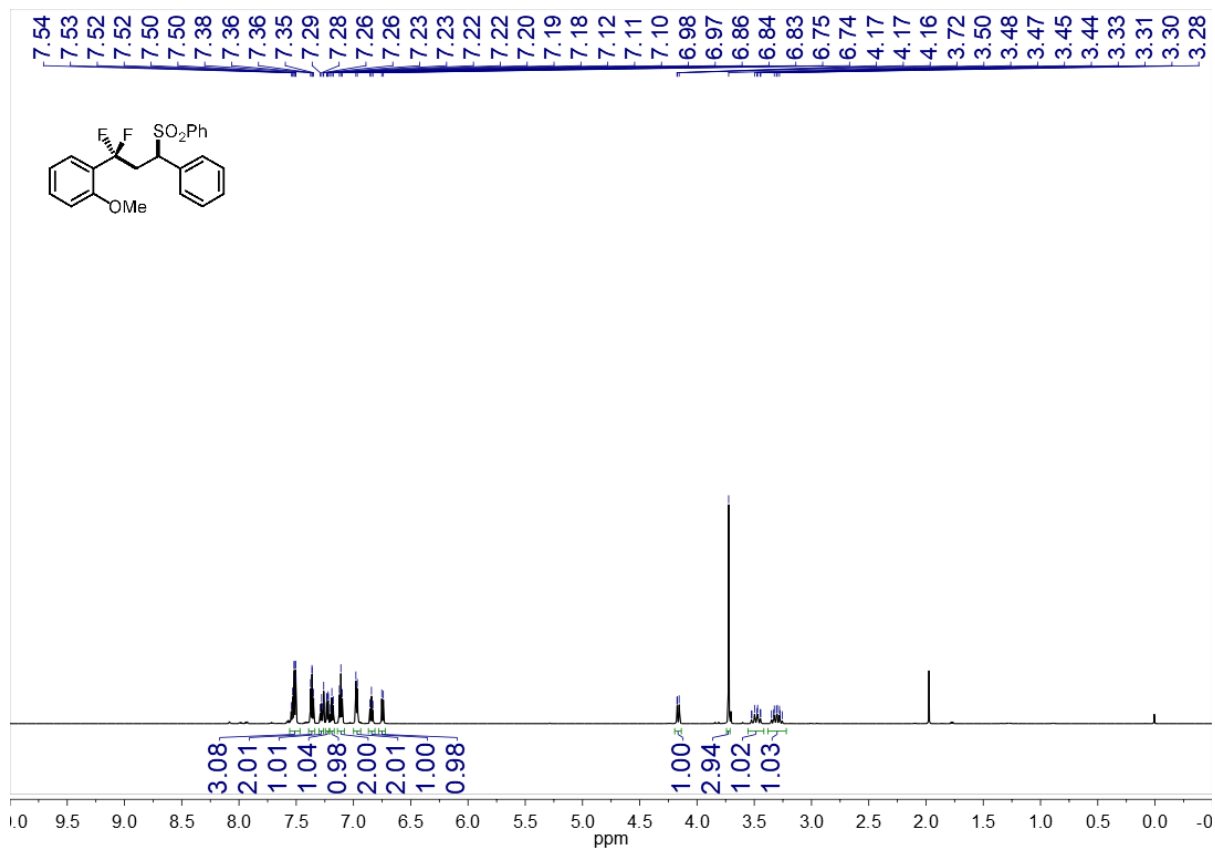

$^1\text{H}$  NMR spectrum (600 MHz,  $\text{CDCl}_3$ , 23 °C) of **5a**

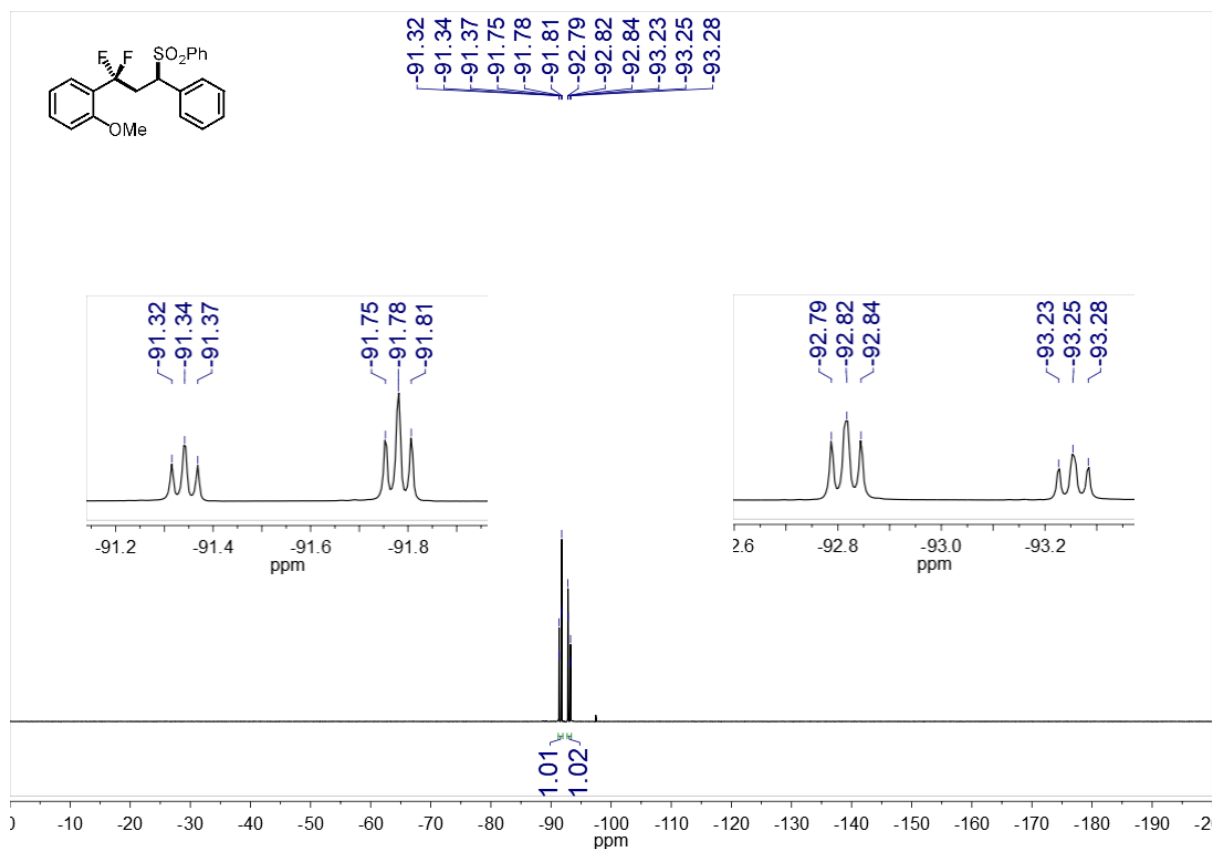

$^{19}\text{F}$  NMR spectrum (565 MHz,  $\text{CDCl}_3$ , 23 °C) of **5a**

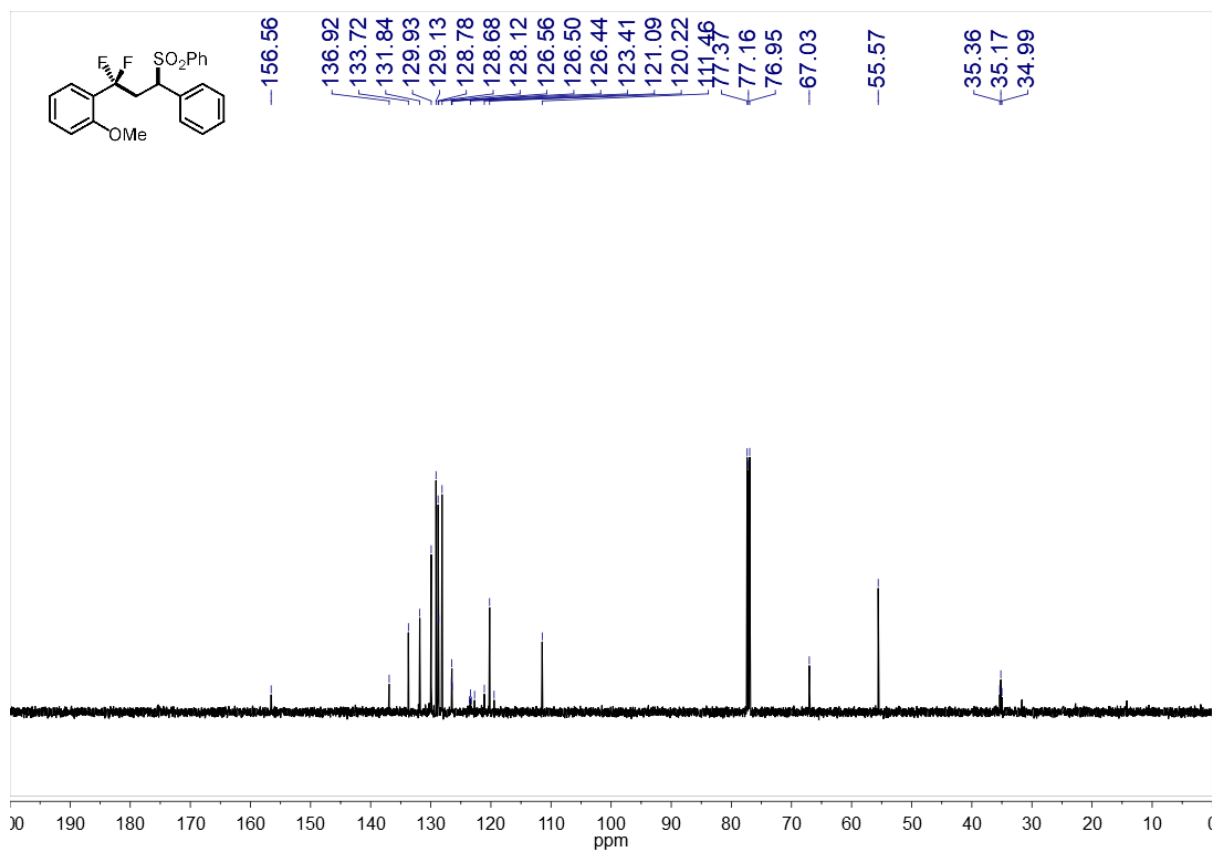

$^{13}\text{C}$  NMR spectrum (151 MHz,  $\text{CDCl}_3$ , 23 °C) of **5a**

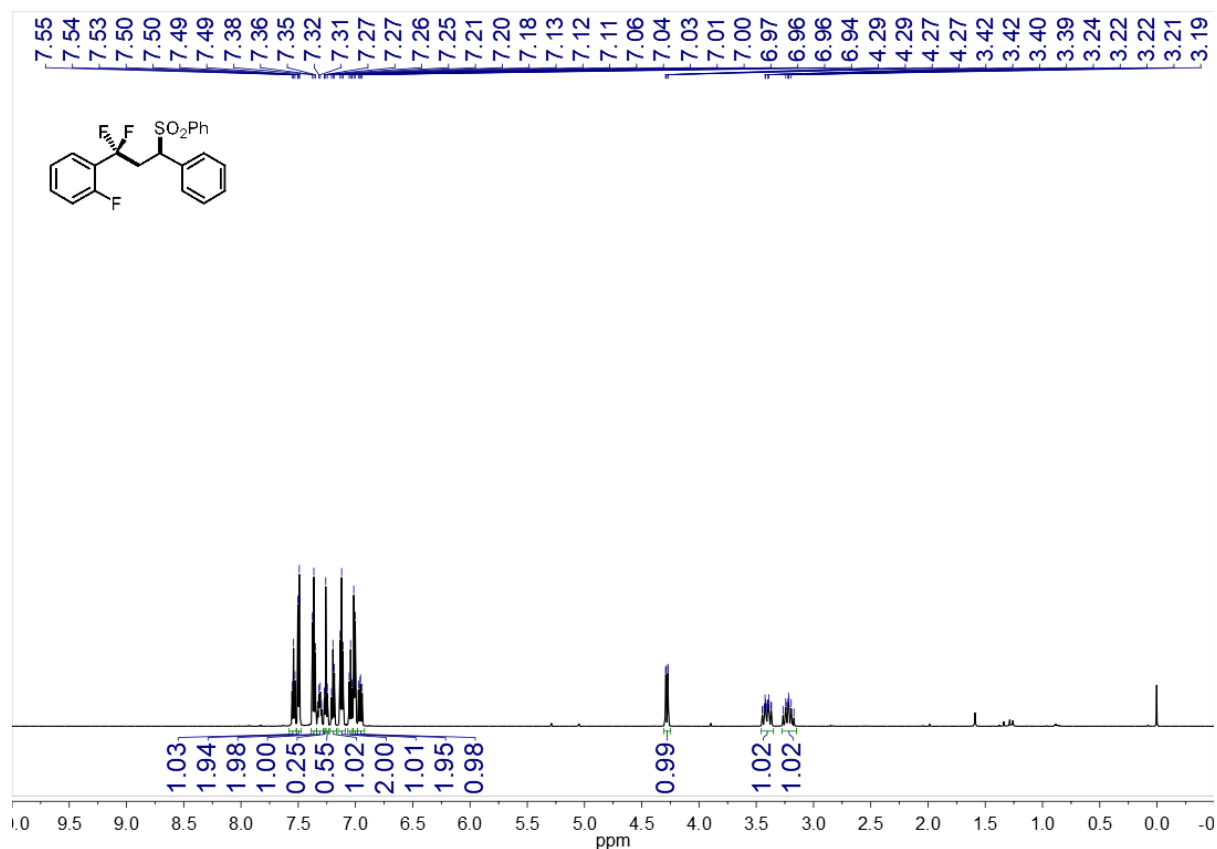

<sup>1</sup>H NMR spectrum (600 MHz, CDCl<sub>3</sub>, 23 °C) of **5b**

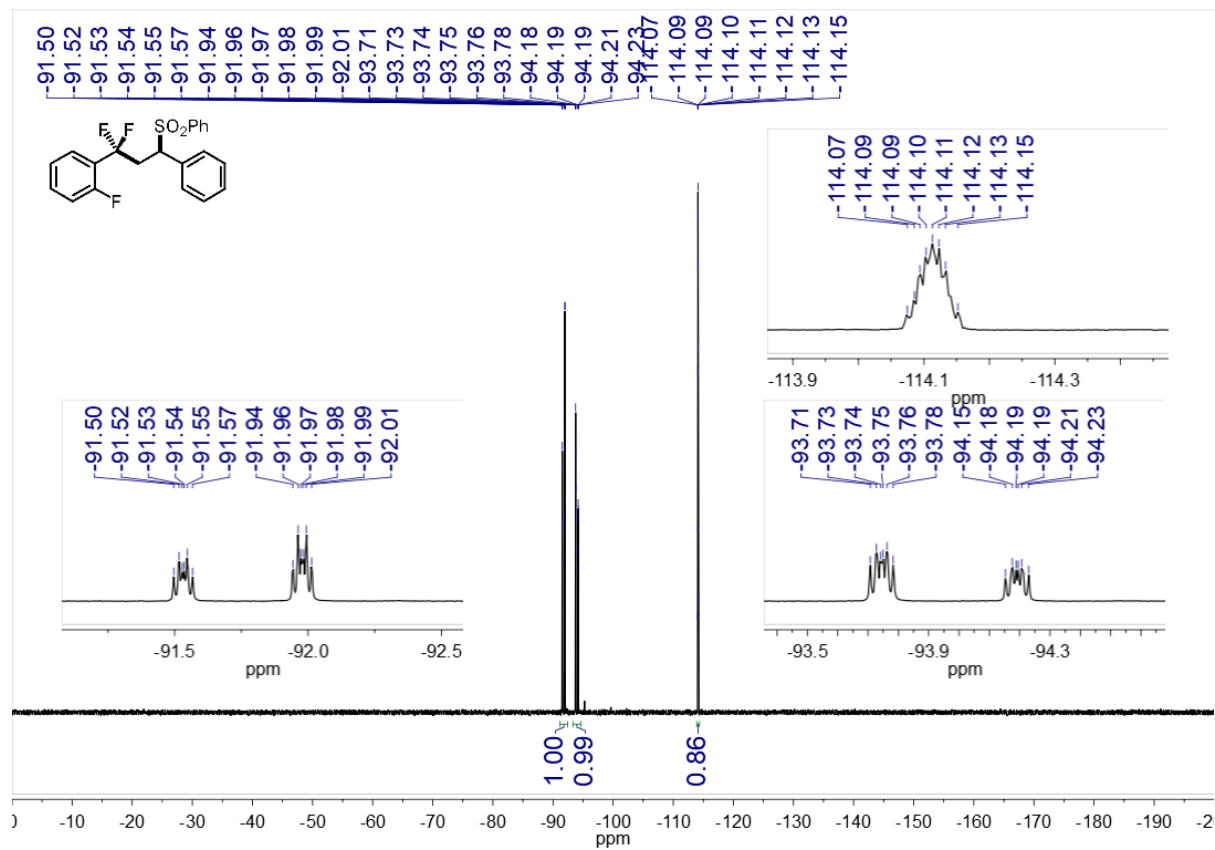

<sup>19</sup>F NMR spectrum (565 MHz, CDCl<sub>3</sub>, 23 °C) of **5b**



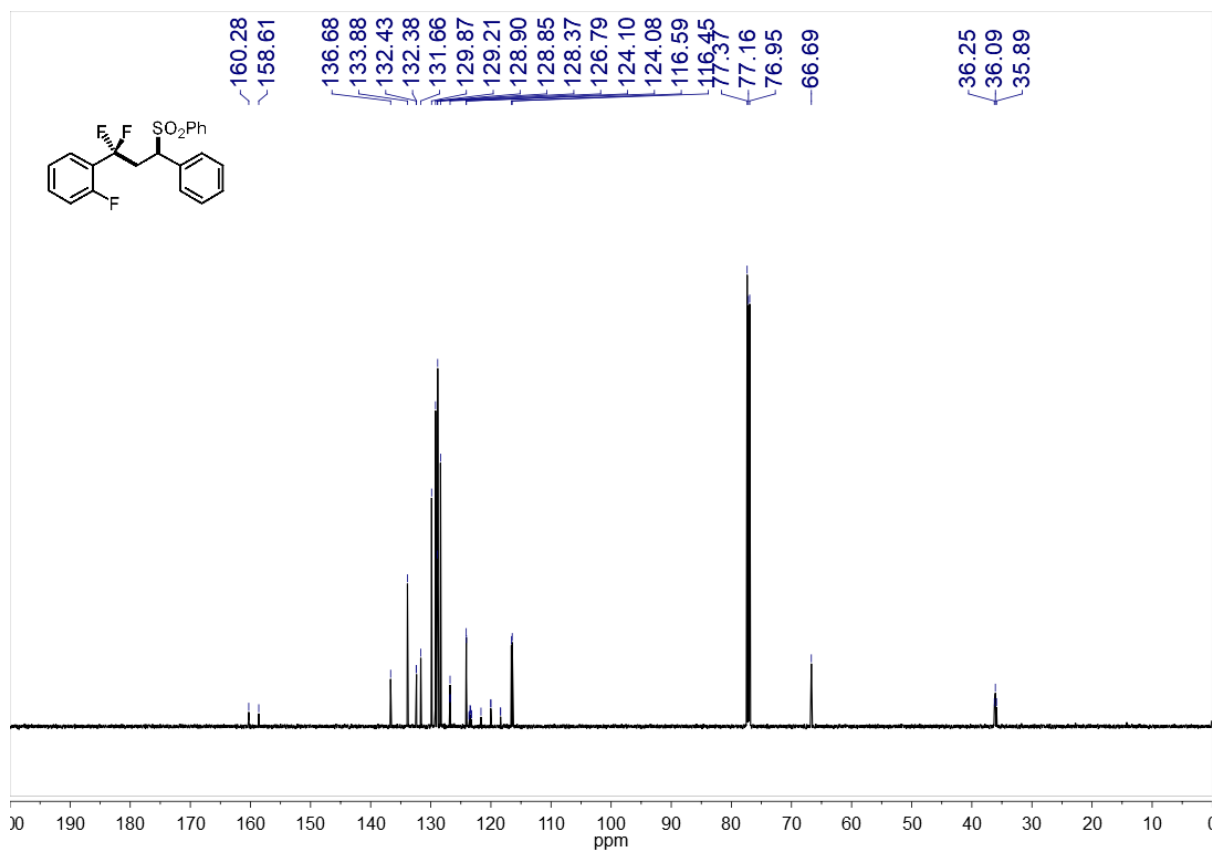

<sup>13</sup>C NMR spectrum (151 MHz, CDCl<sub>3</sub>, 23 °C) of **5b**

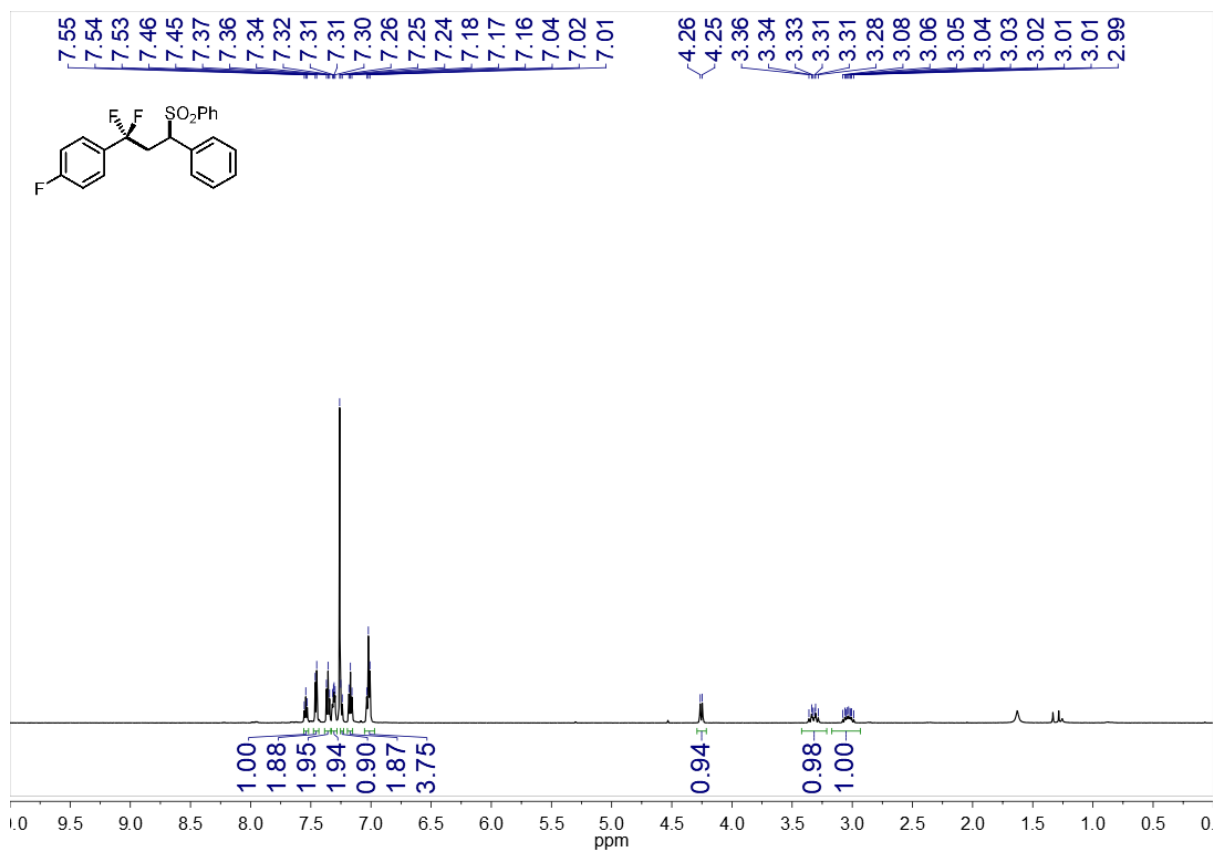

<sup>1</sup>H NMR spectrum (600 MHz, CDCl<sub>3</sub>, 23 °C) of **5c**

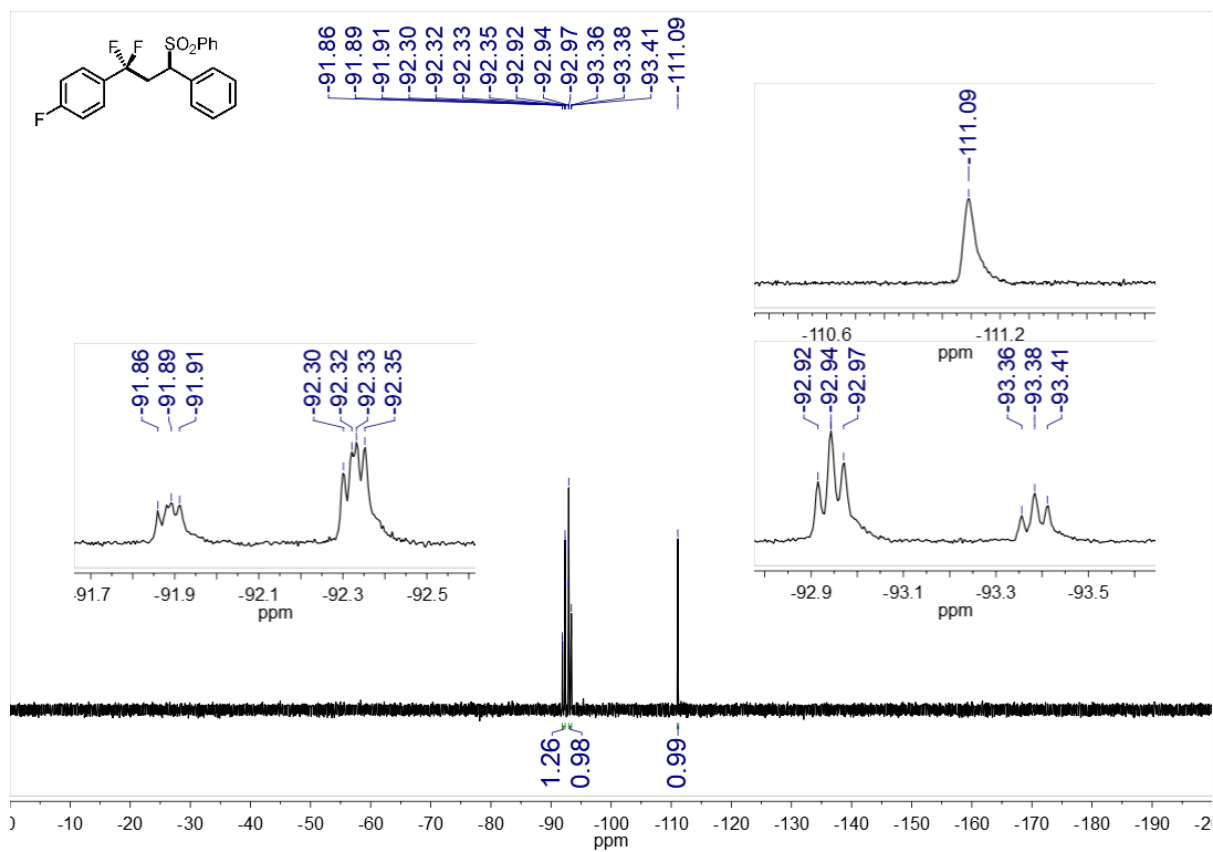

<sup>19</sup>F NMR spectrum (565 MHz, CDCl<sub>3</sub>, 23 °C) of **5c**

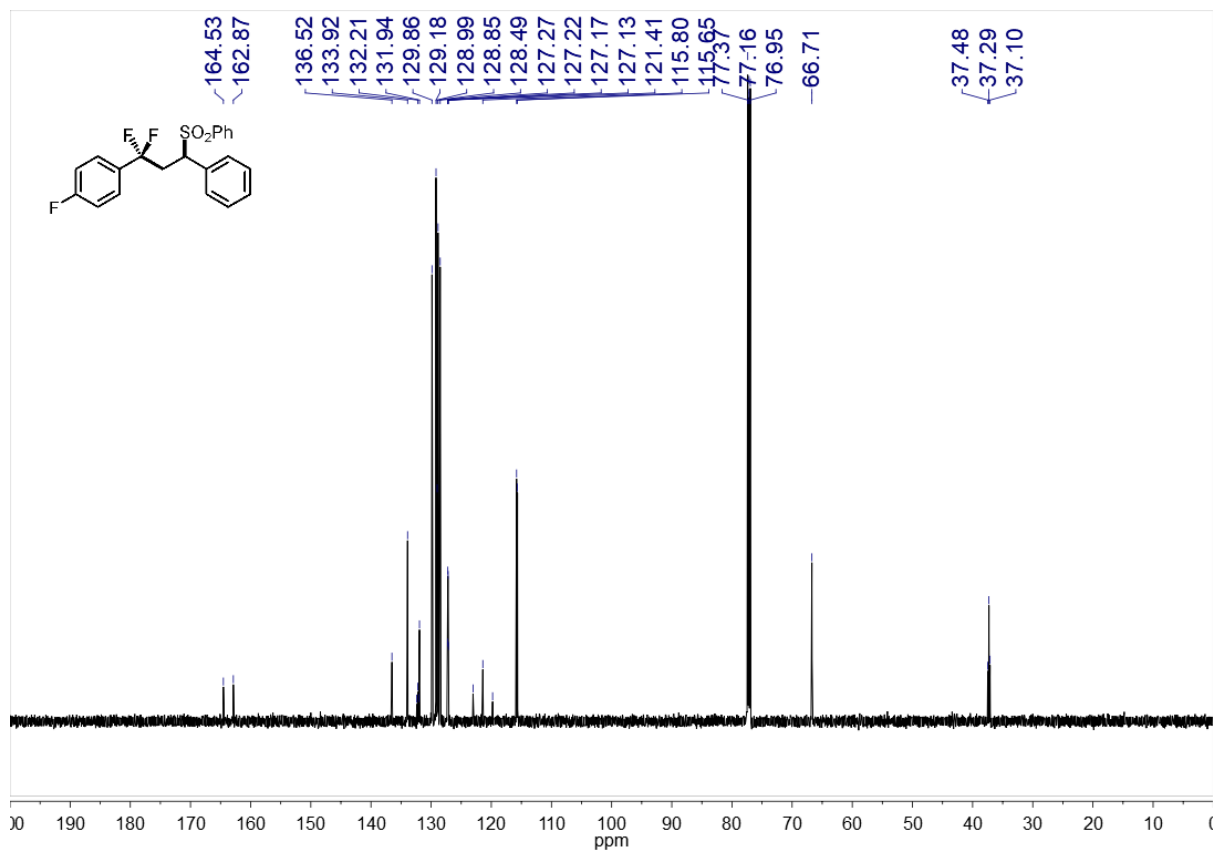

<sup>13</sup>C NMR spectrum (151 MHz, CDCl<sub>3</sub>, 23 °C) of **5c**

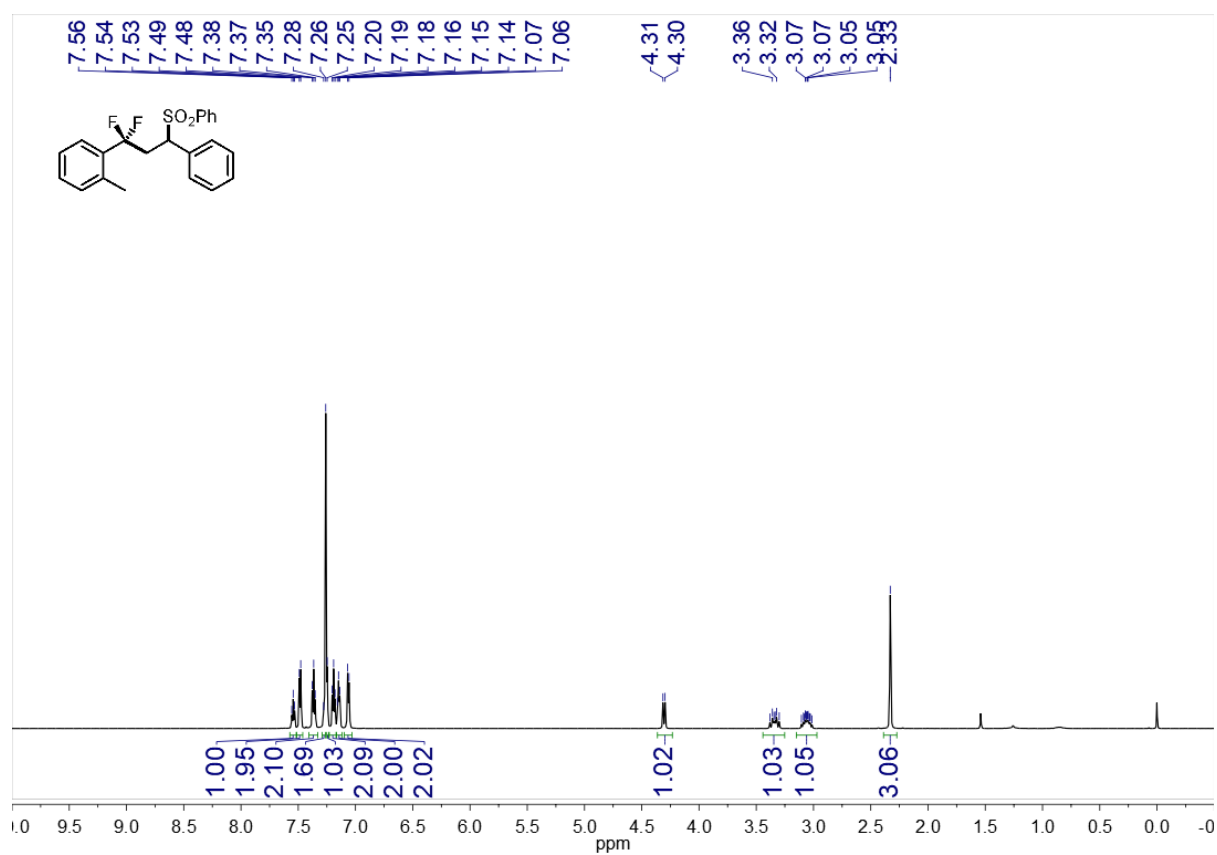

<sup>1</sup>H NMR spectrum (600 MHz, CDCl<sub>3</sub>, 23 °C) of **5d**

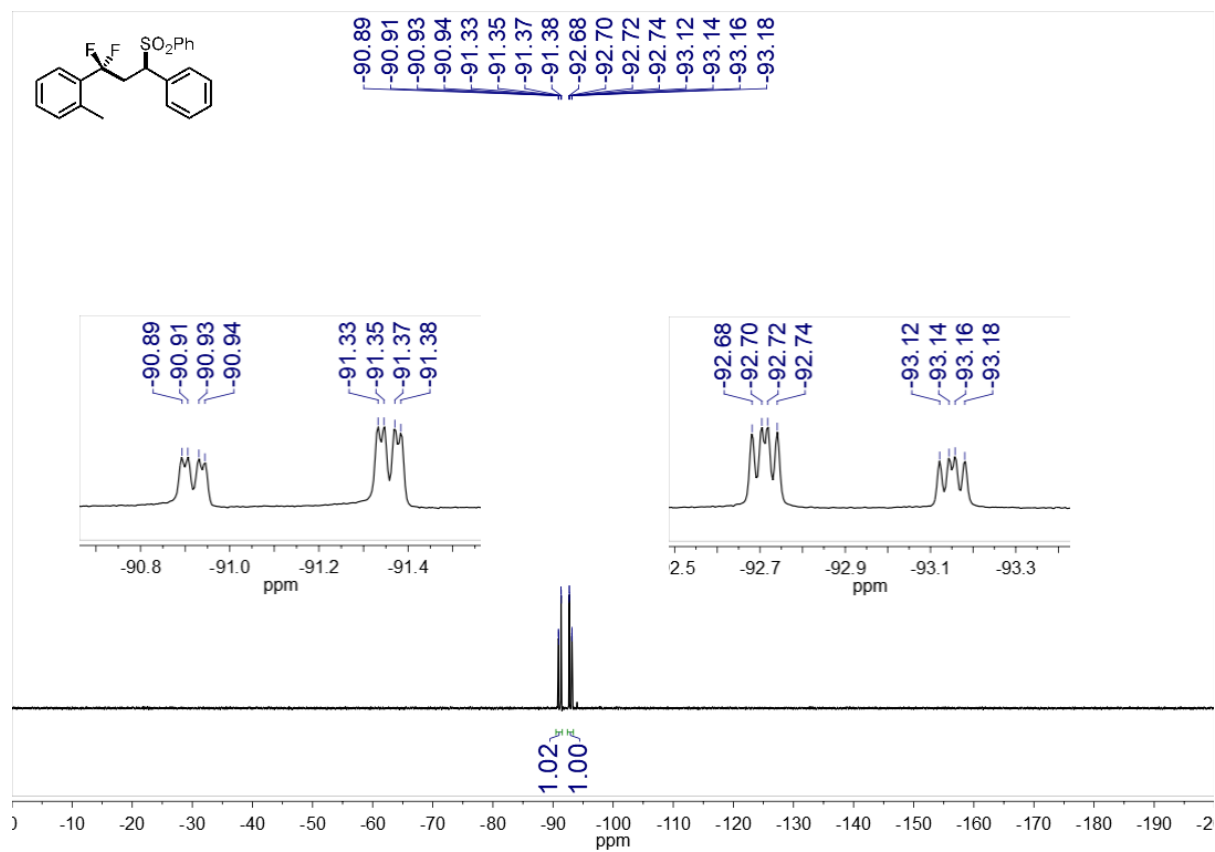

<sup>19</sup>F NMR spectrum (565 MHz, CDCl<sub>3</sub>, 23 °C) of **5d**

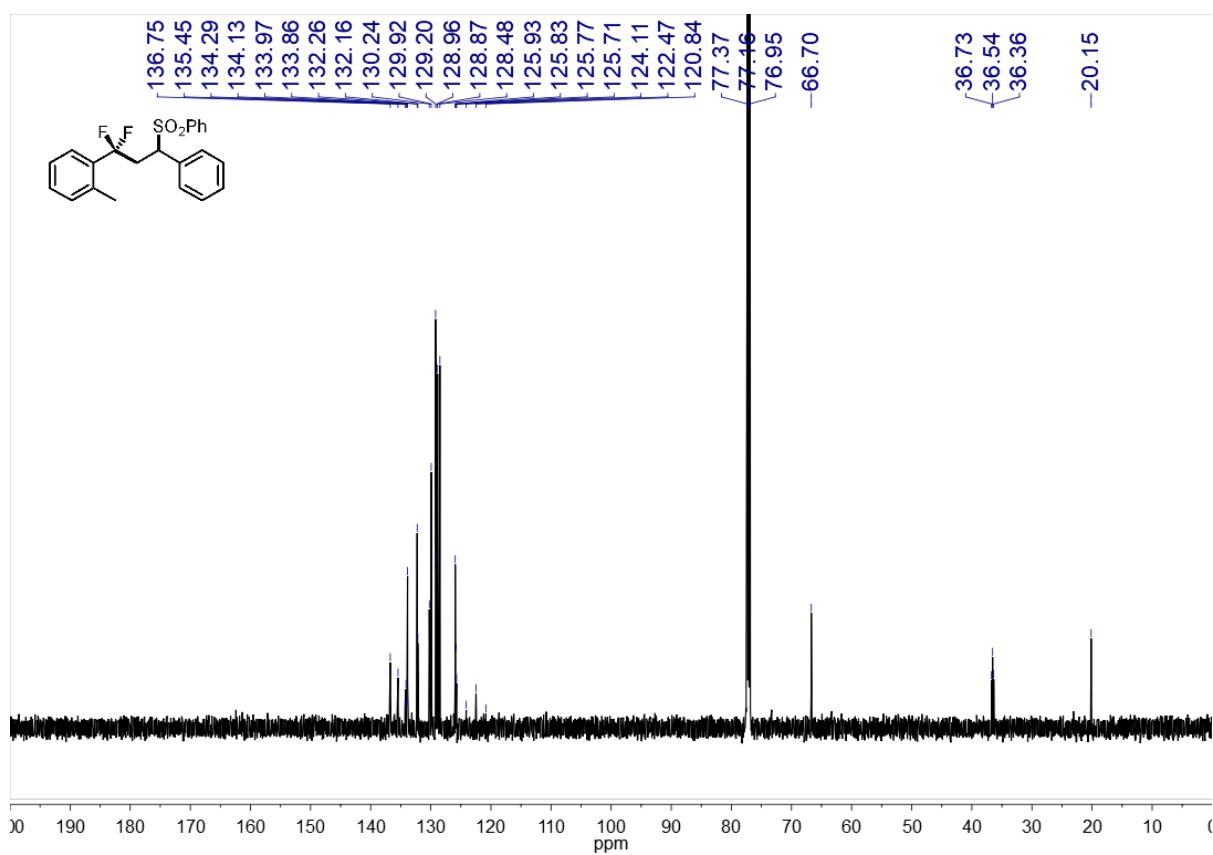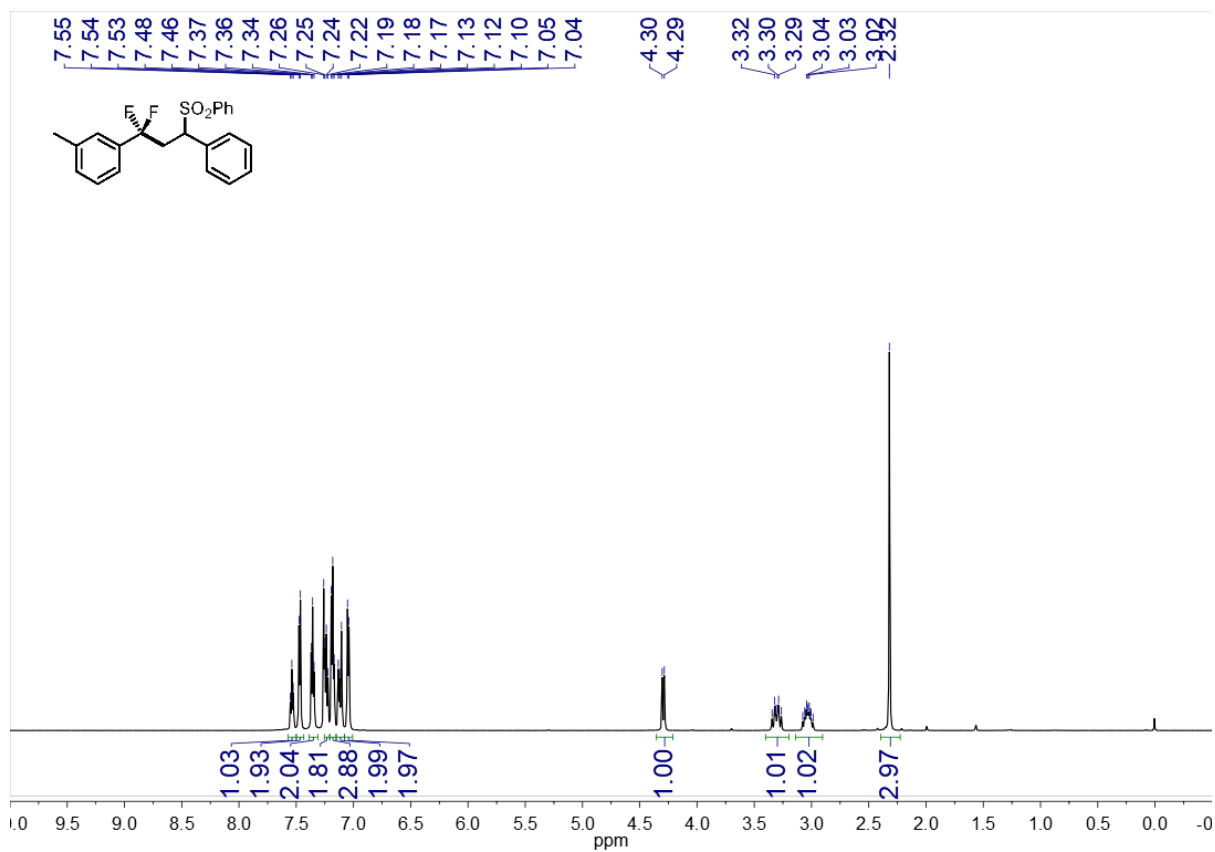

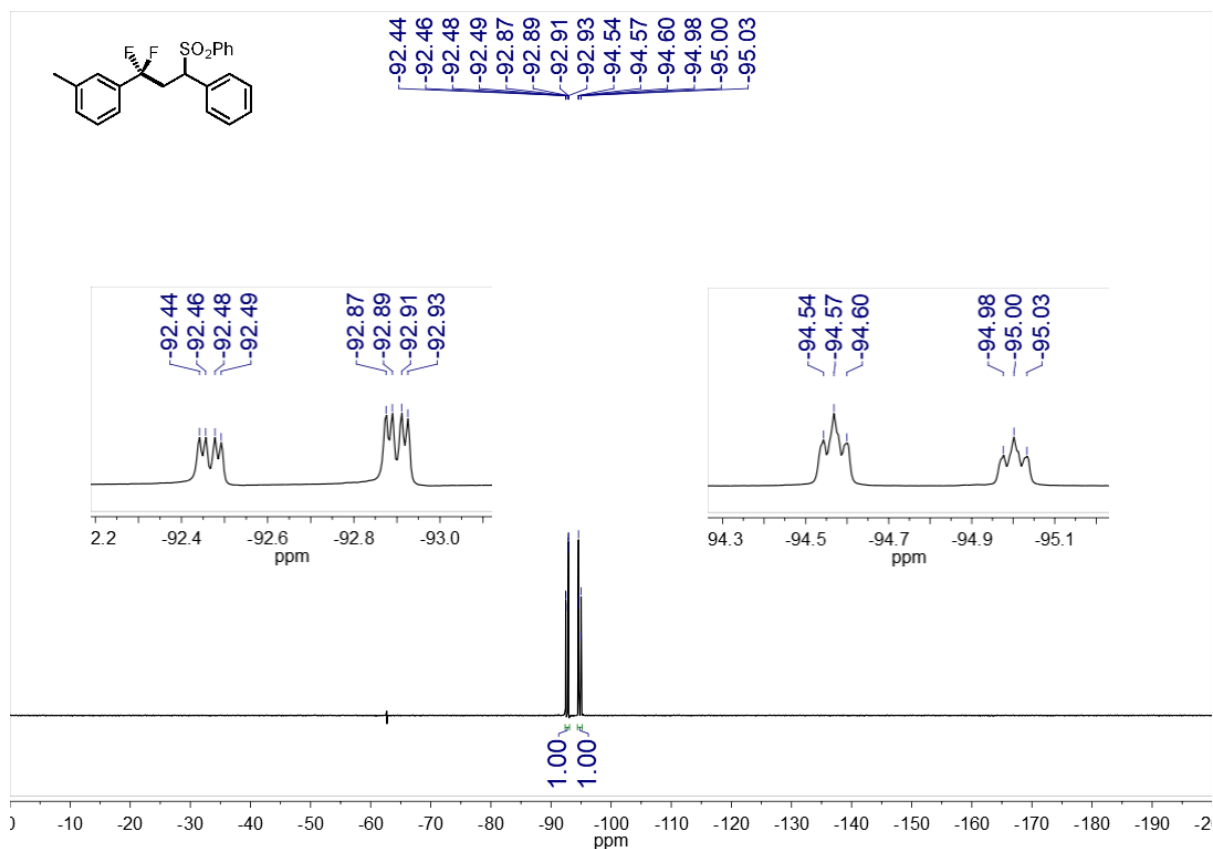

$^{19}\text{F}$  NMR spectrum (565 MHz,  $\text{CDCl}_3$ , 23  $^\circ\text{C}$ ) of **5e**

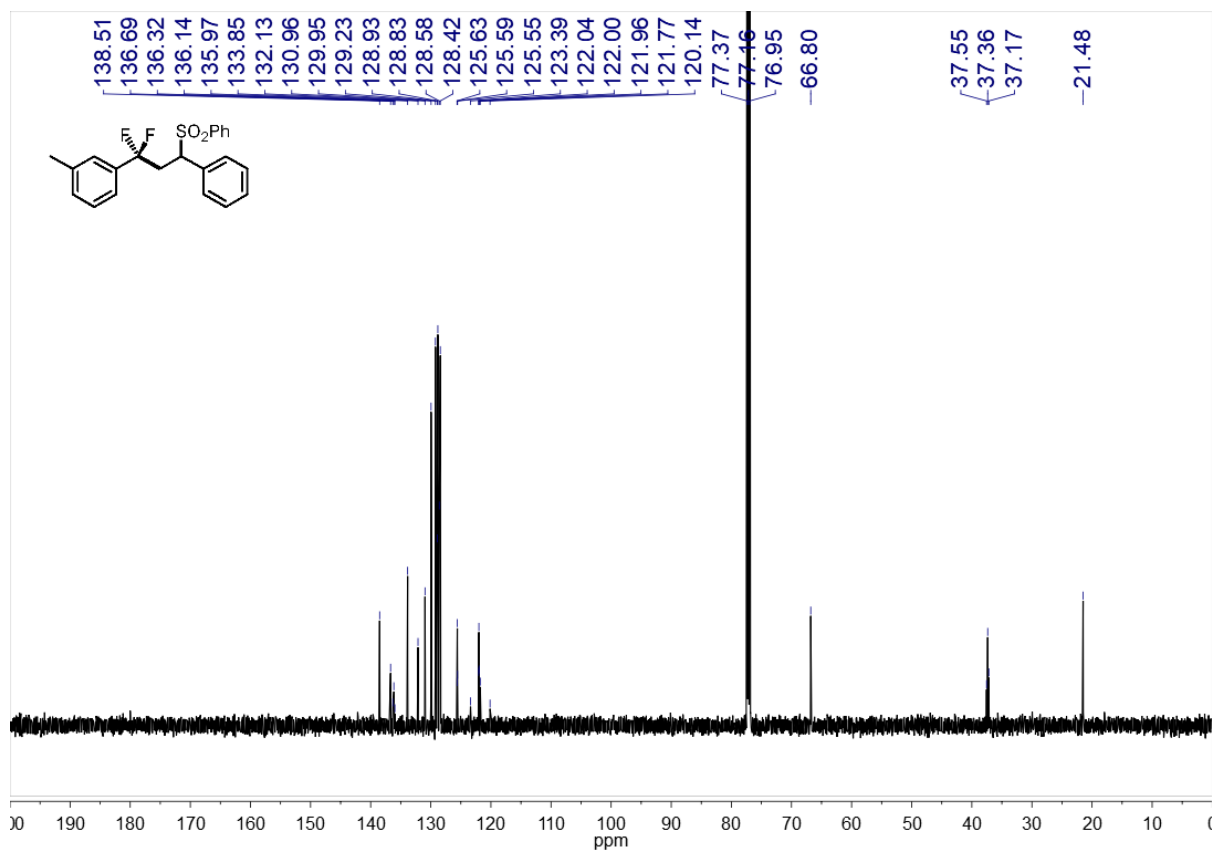

$^{13}\text{C}$  NMR spectrum (151 MHz,  $\text{CDCl}_3$ , 23  $^\circ\text{C}$ ) of **5e**

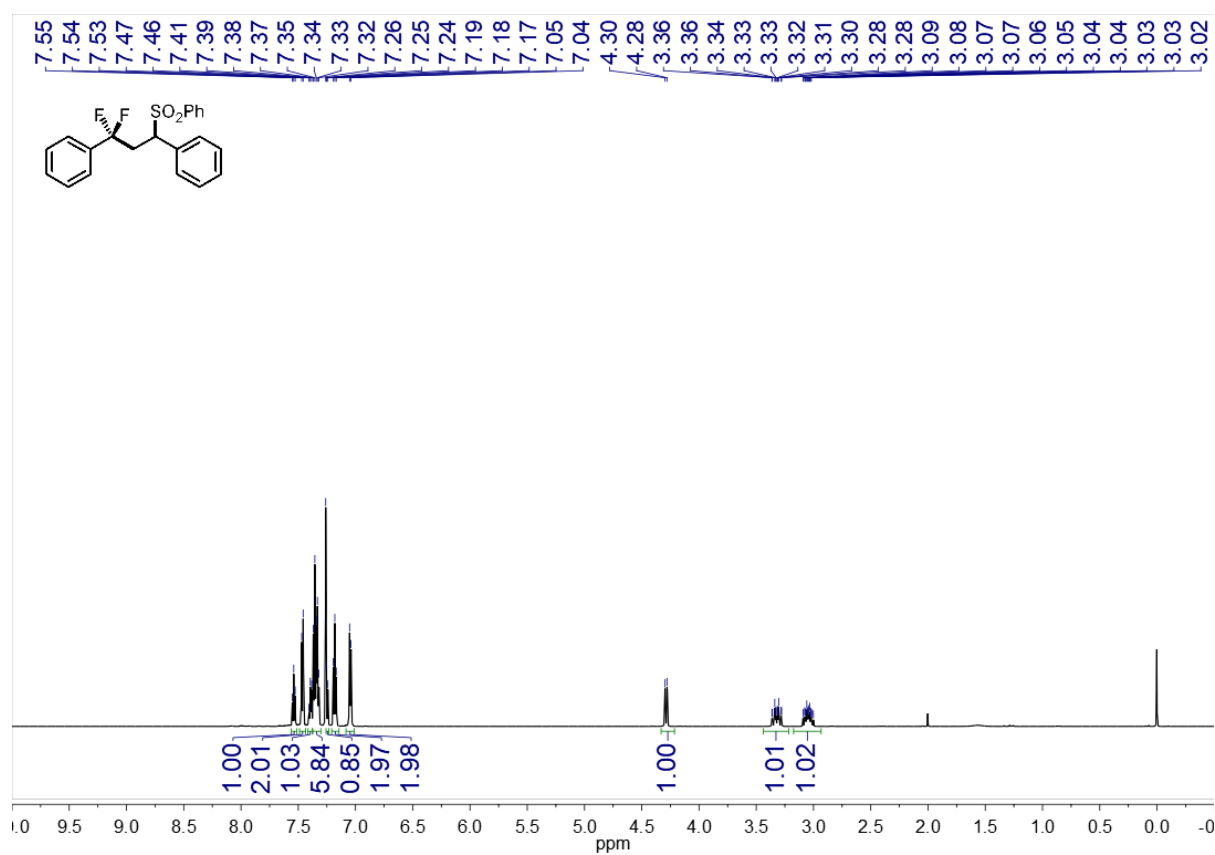

<sup>1</sup>H NMR spectrum (600 MHz, CDCl<sub>3</sub>, 23 °C) of **5f**

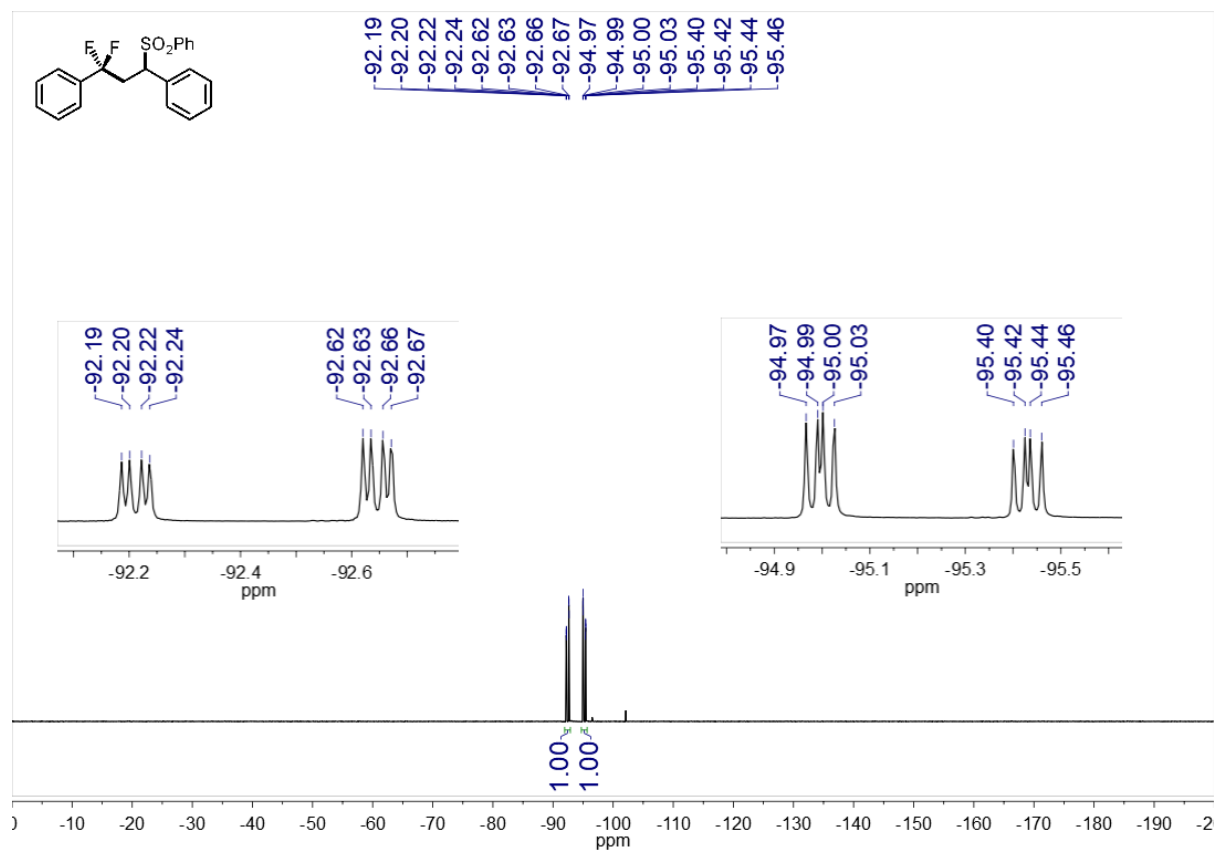

<sup>19</sup>F NMR spectrum (565 MHz, CDCl<sub>3</sub>, 23 °C) of **5f**

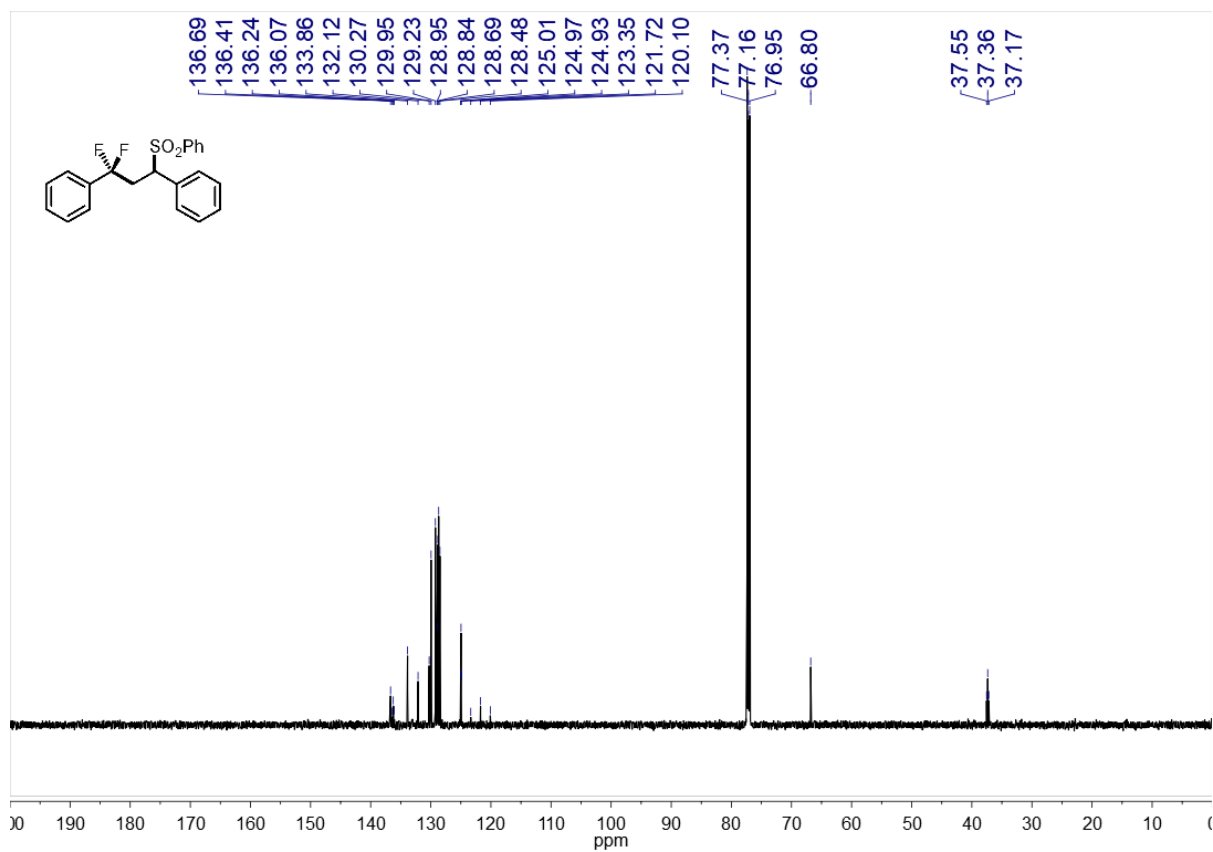

<sup>13</sup>C NMR spectrum (151 MHz, CDCl<sub>3</sub>, 23 °C) of **5f**

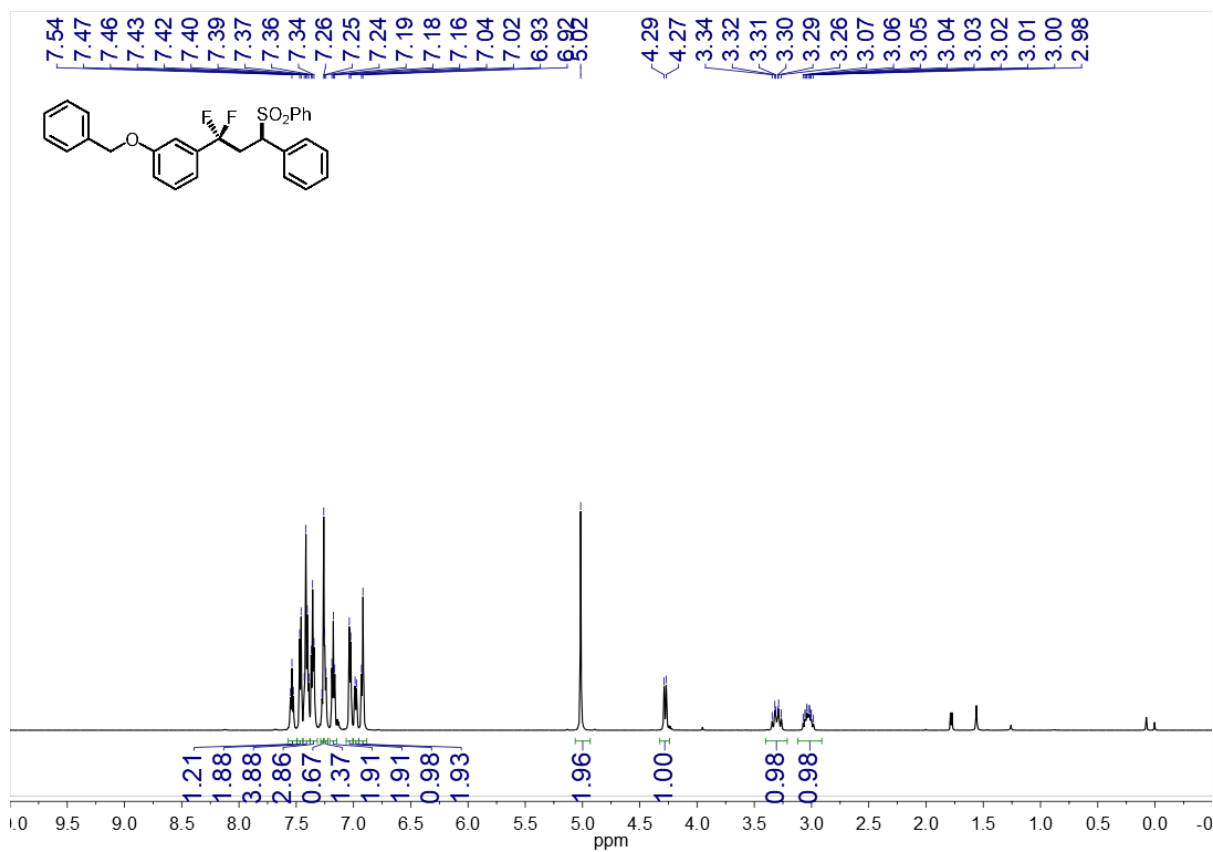

<sup>1</sup>H NMR spectrum (600 MHz, CDCl<sub>3</sub>, 23 °C) of **5g**

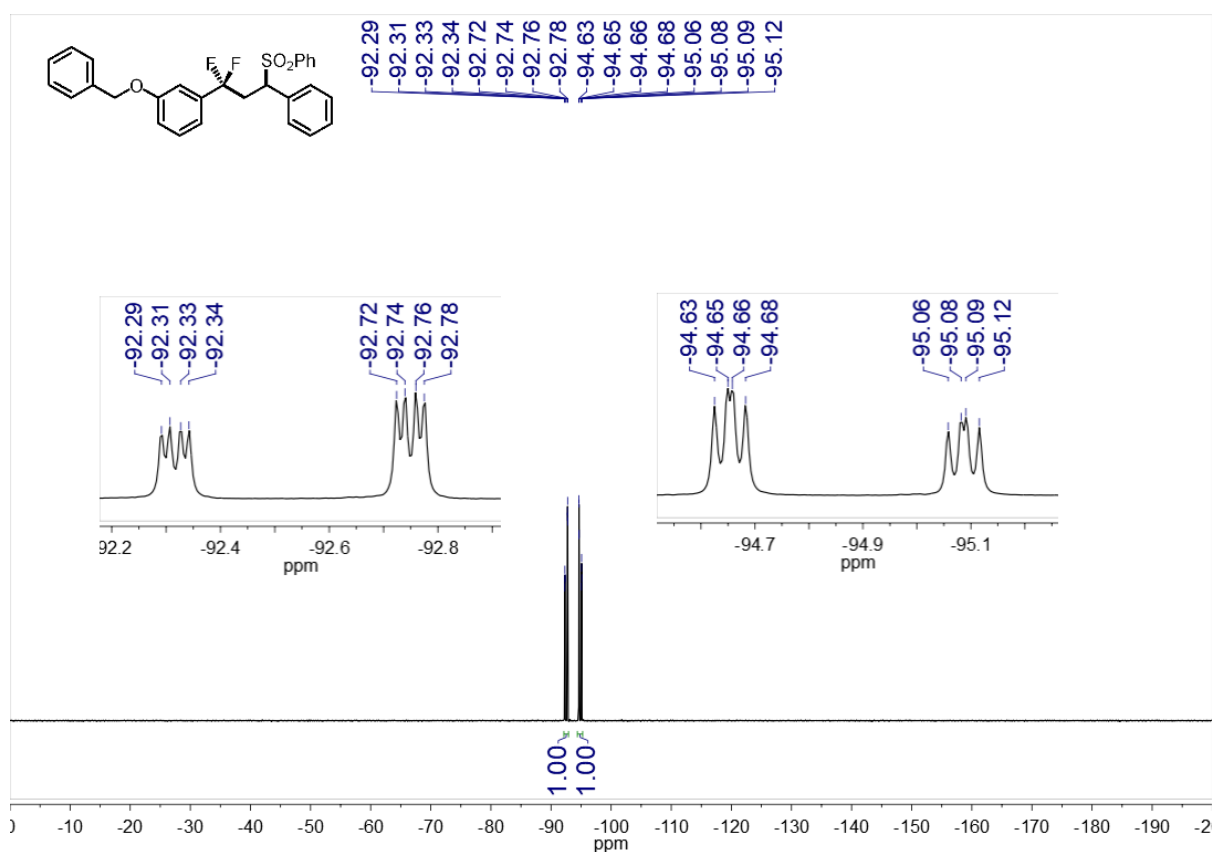

$^{19}\text{F}$  NMR spectrum (565 MHz,  $\text{CDCl}_3$ , 23 °C) of **5g**

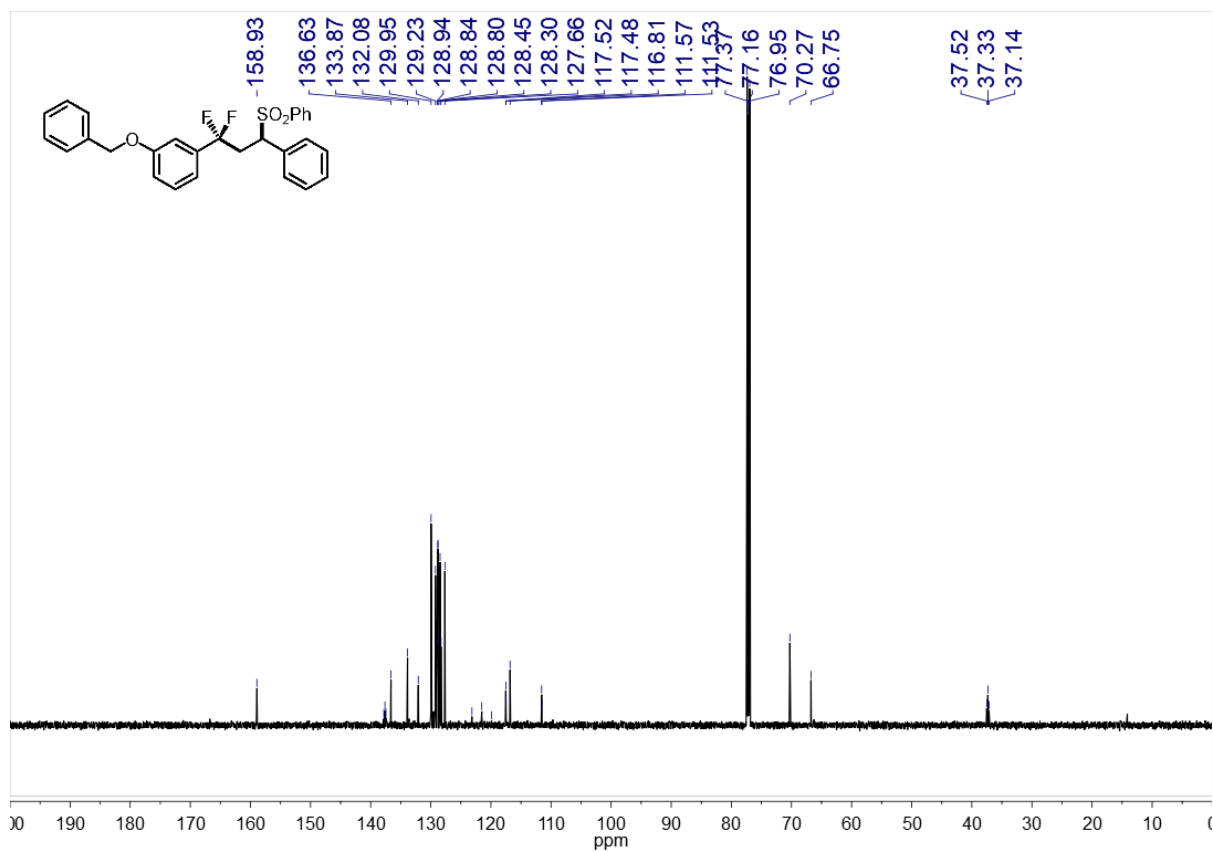

$^{13}\text{C}$  NMR spectrum (151 MHz,  $\text{CDCl}_3$ , 23 °C) of **5g**



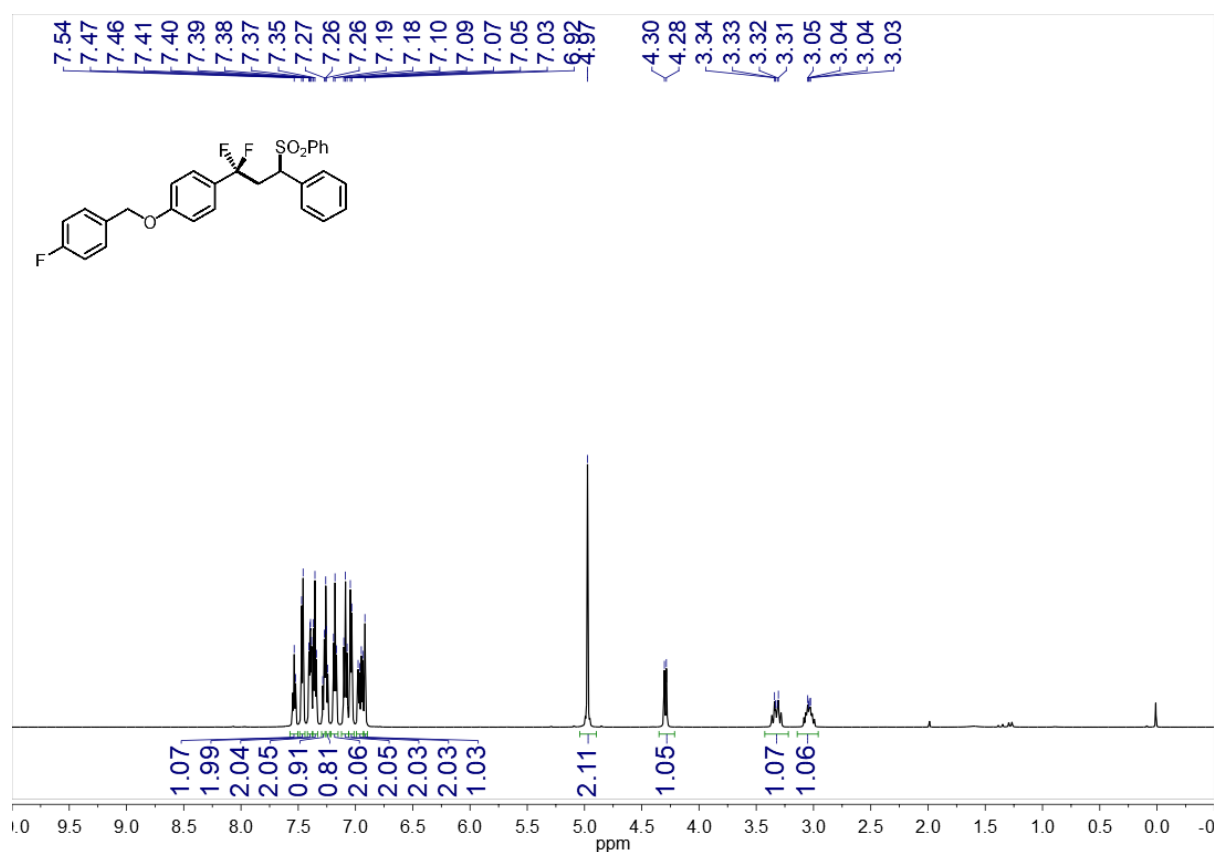

<sup>1</sup>H NMR spectrum (600 MHz, CDCl<sub>3</sub>, 23 °C) of **5h**

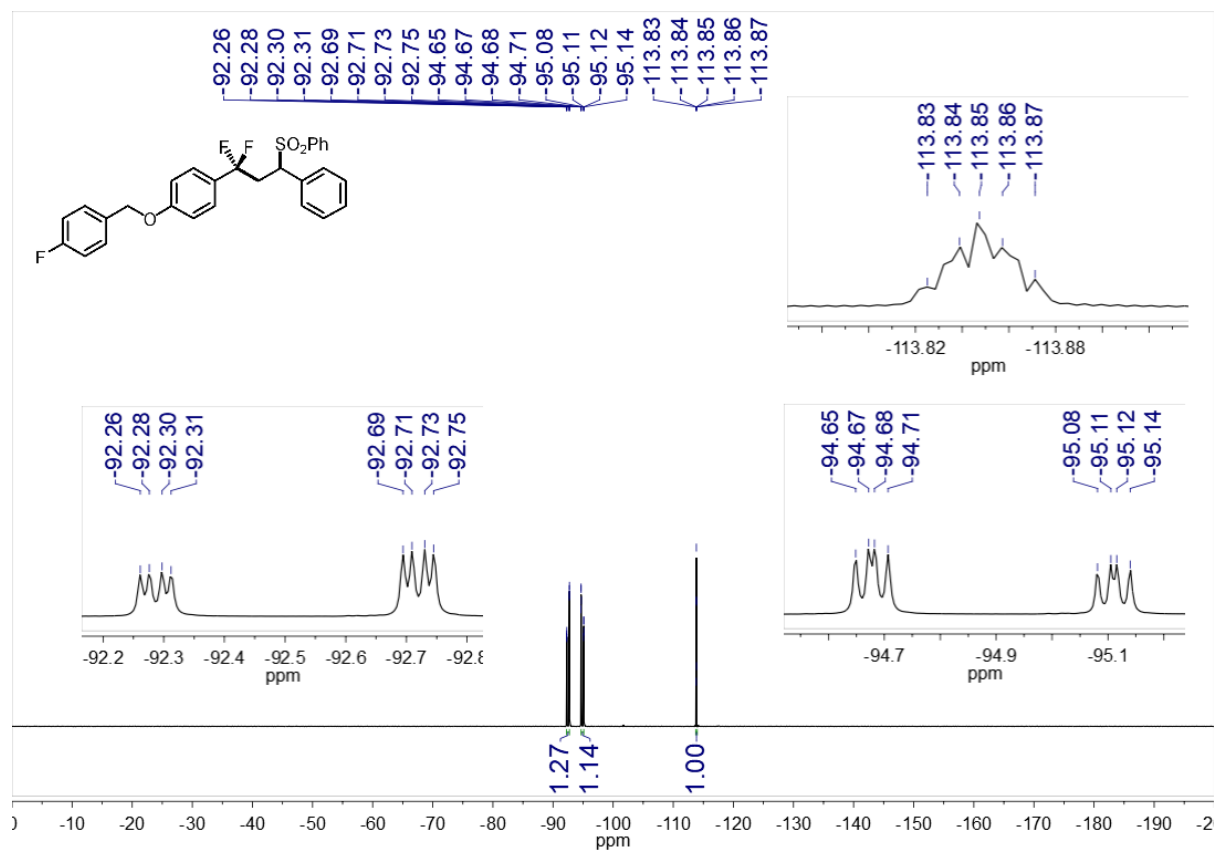

<sup>19</sup>F NMR spectrum (565 MHz, CDCl<sub>3</sub>, 23 °C) of **5h**

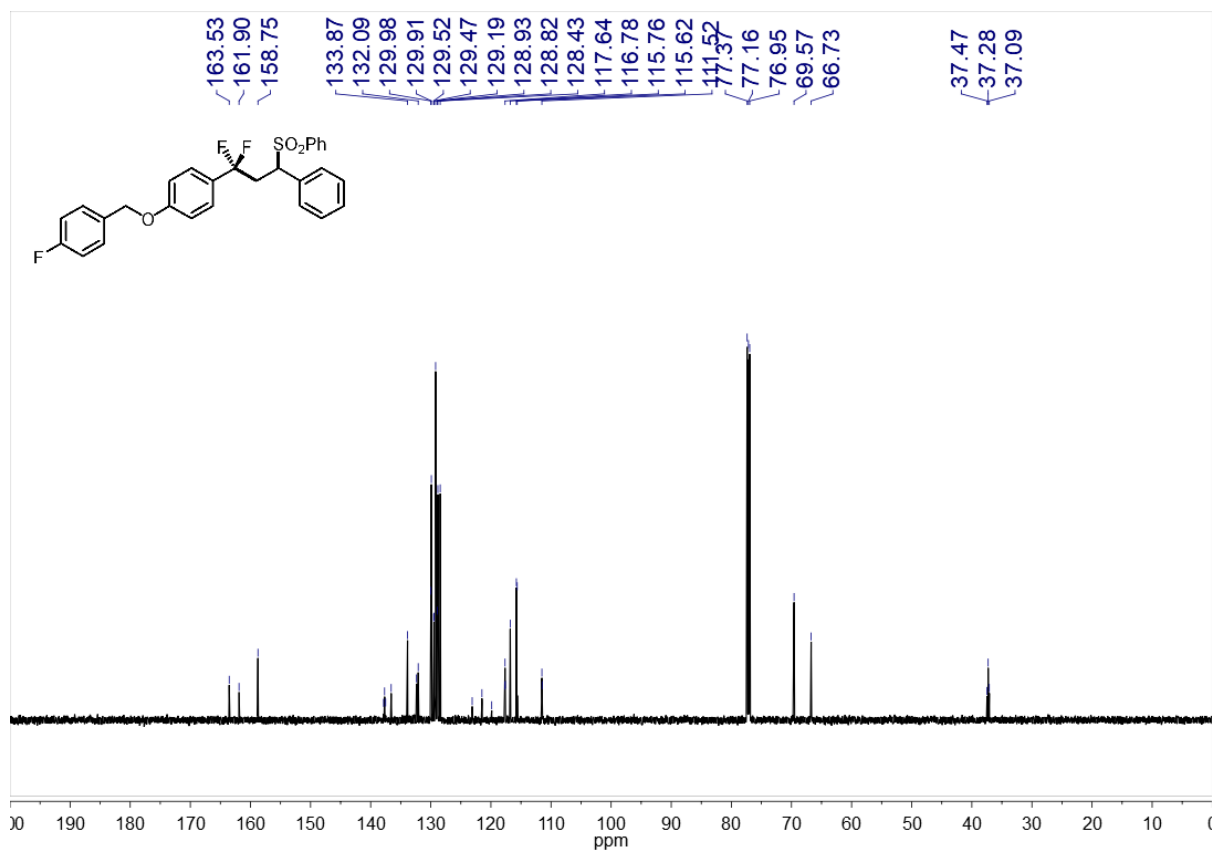

<sup>13</sup>C NMR spectrum (151 MHz, CDCl<sub>3</sub>, 23 °C) of **5h**

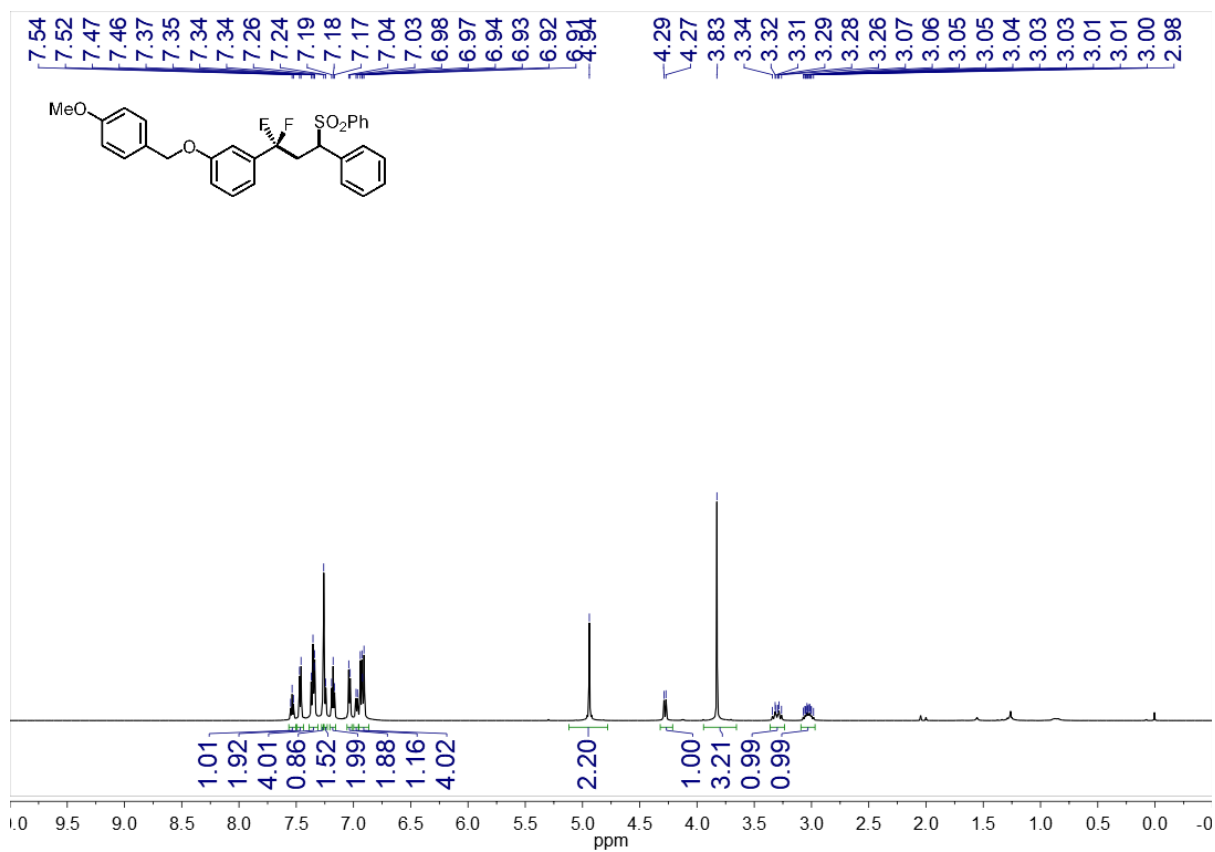

<sup>1</sup>H NMR spectrum (600 MHz, CDCl<sub>3</sub>, 23 °C) of **5i**

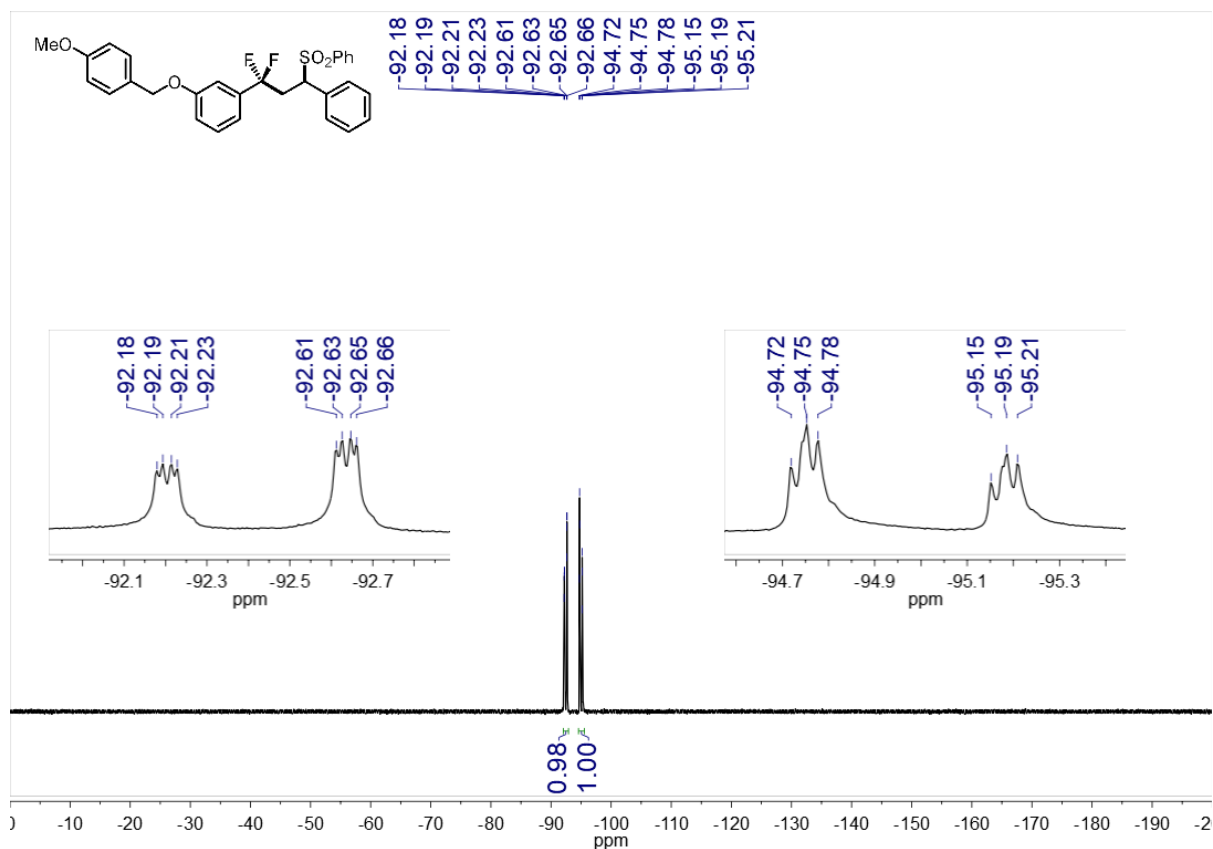

<sup>19</sup>F NMR spectrum (565 MHz, CDCl<sub>3</sub>, 23 °C) of **5i**

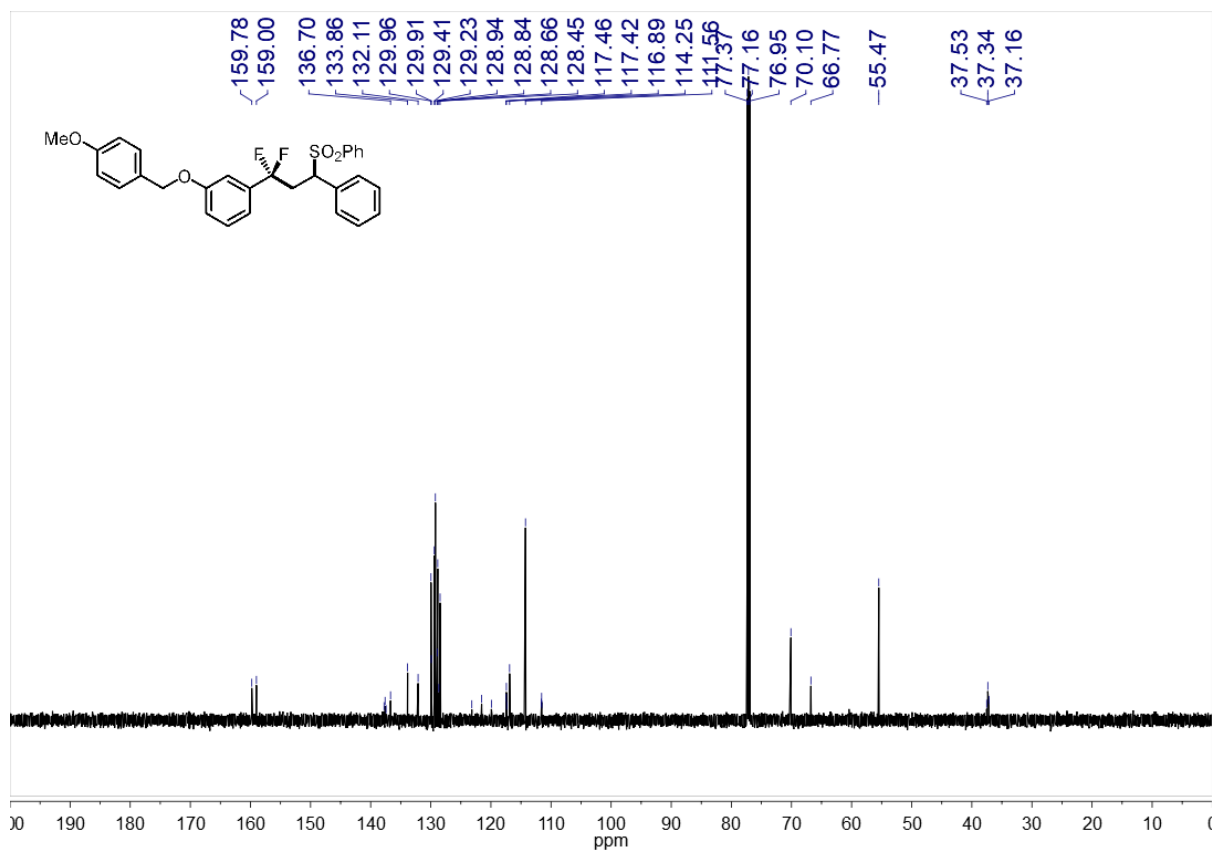

<sup>13</sup>C NMR spectrum (151 MHz, CDCl<sub>3</sub>, 23 °C) of **5i**

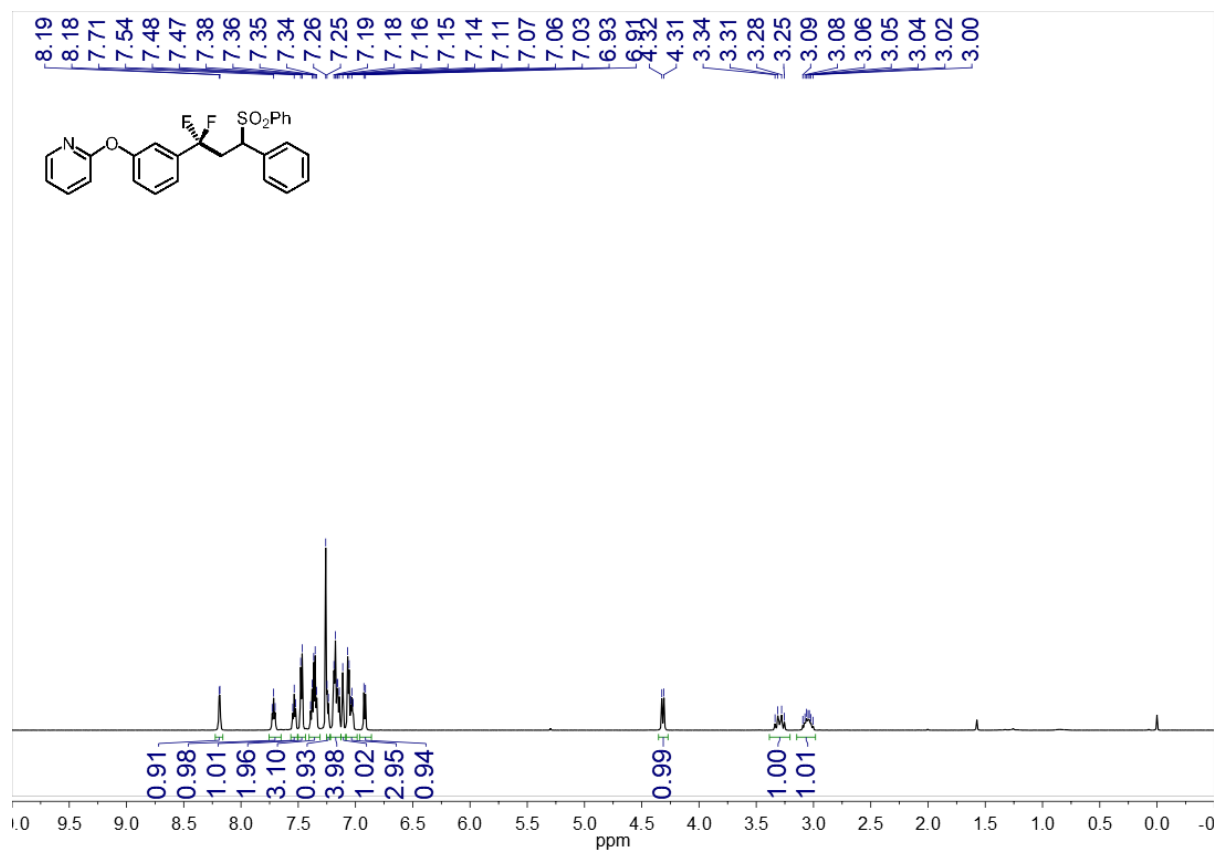

<sup>1</sup>H NMR spectrum (600 MHz, CDCl<sub>3</sub>, 23 °C) of **5j**

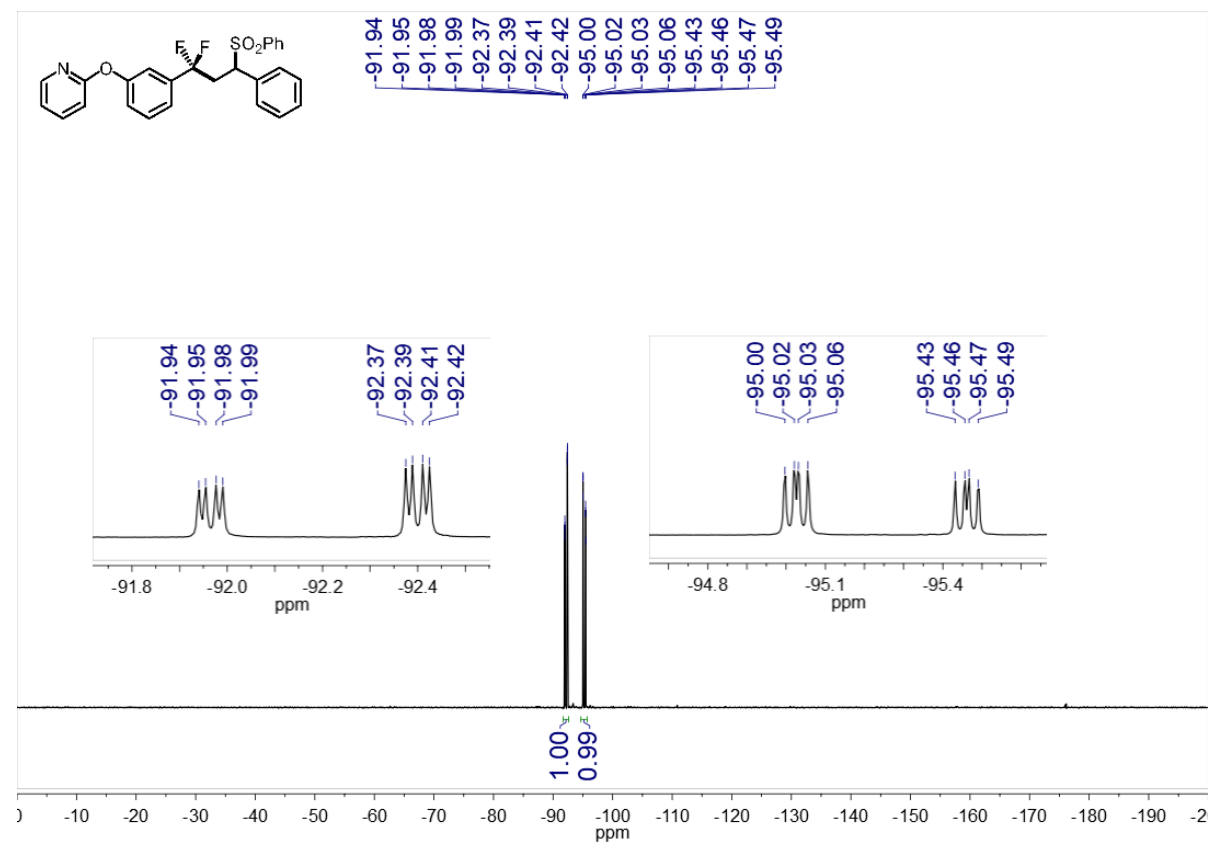

<sup>19</sup>F NMR spectrum (565 MHz, CDCl<sub>3</sub>, 23 °C) of **5j**

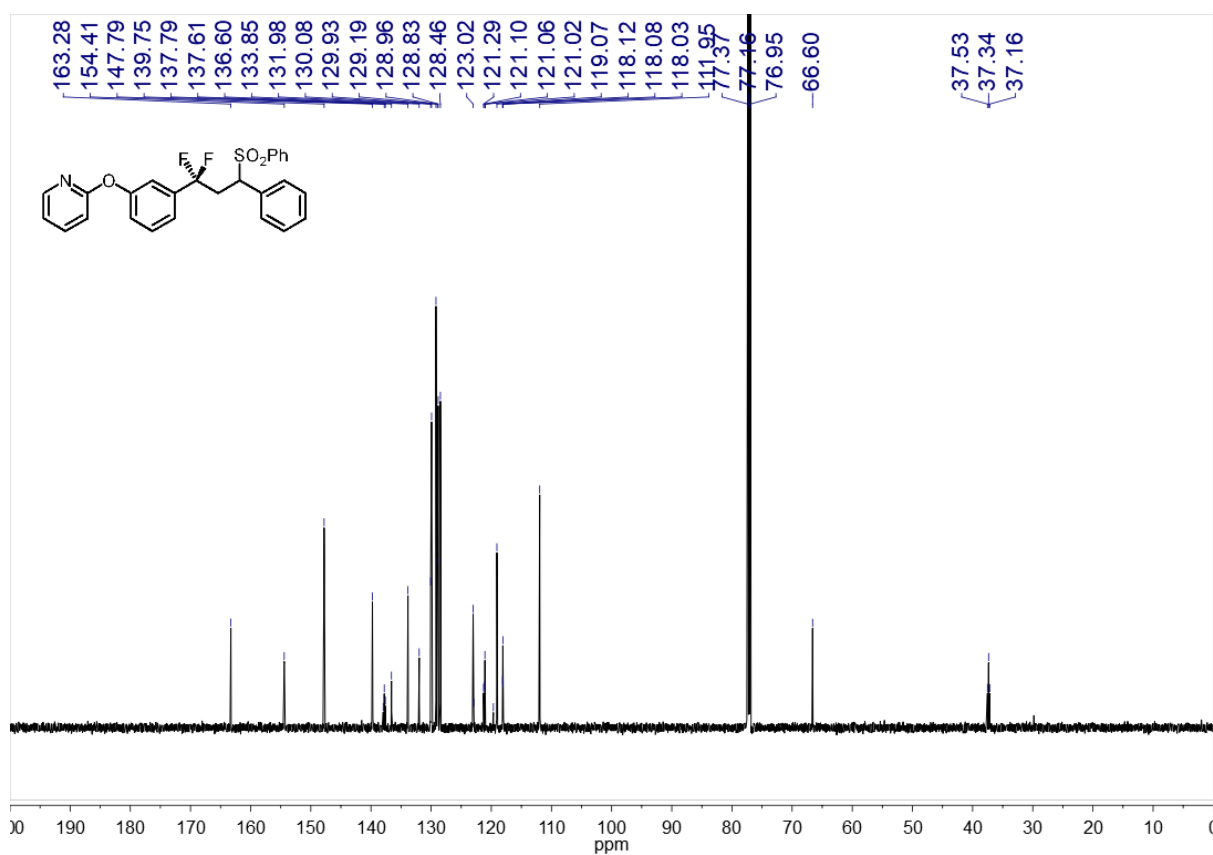

<sup>13</sup>C NMR spectrum (151 MHz, CDCl<sub>3</sub>, 23 °C) of **5j**

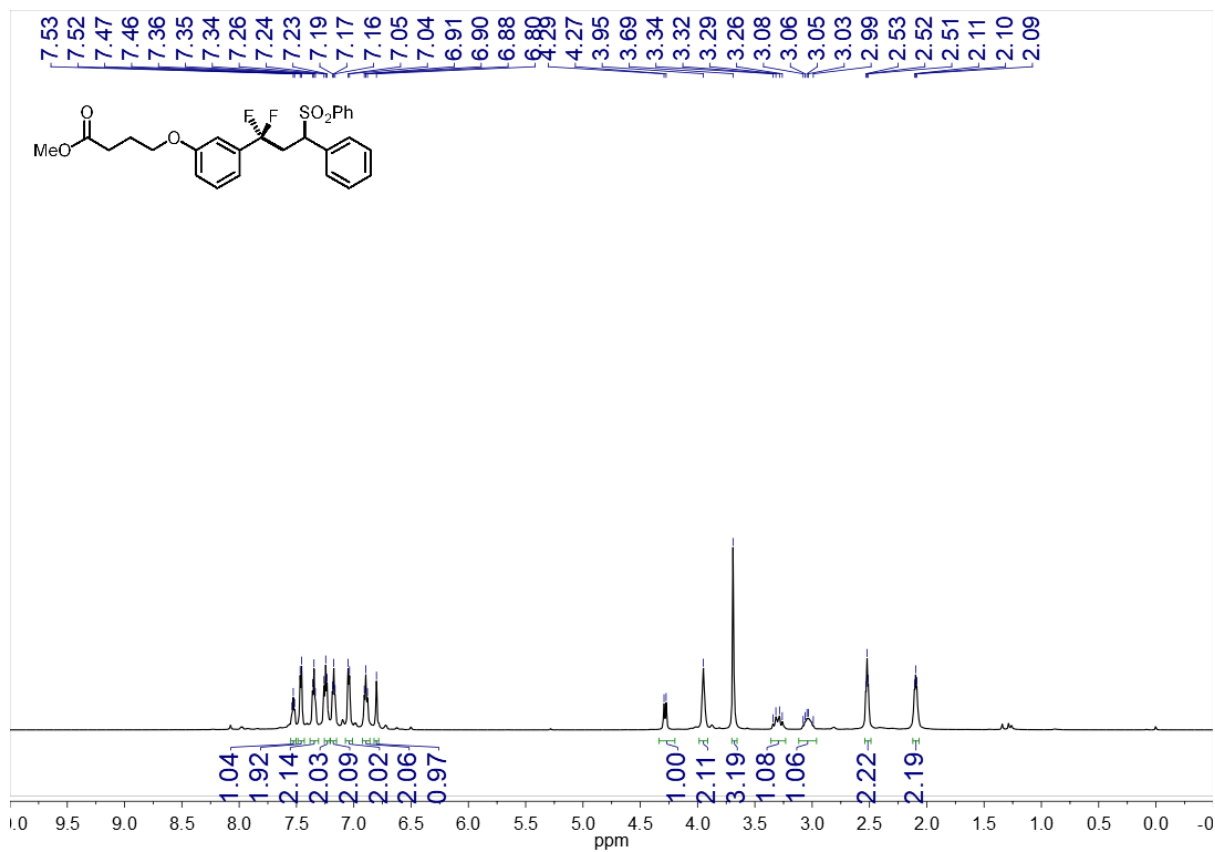

<sup>1</sup>H NMR spectrum (600 MHz, CDCl<sub>3</sub>, 23 °C) of **5k**

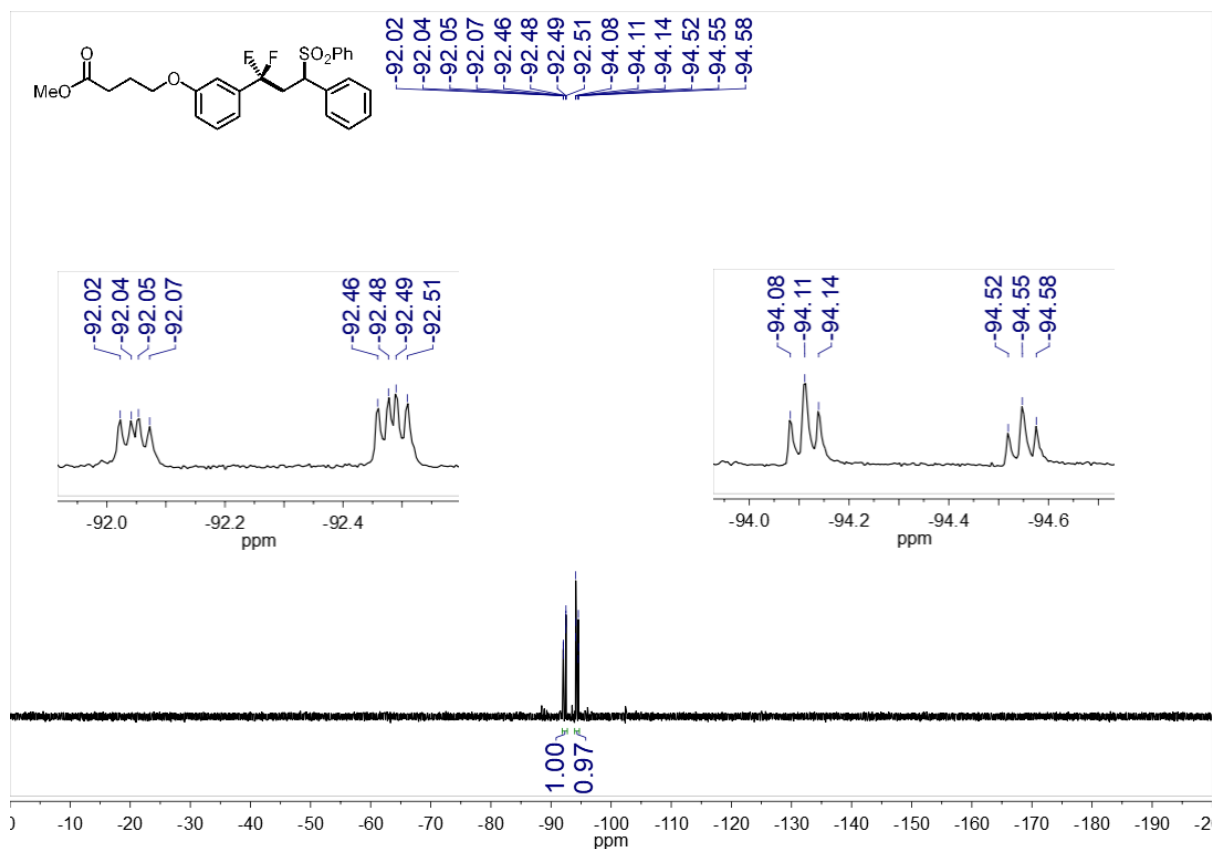

$^{19}\text{F}$  NMR spectrum (565 MHz,  $\text{CDCl}_3$ , 23 °C) of **5k**

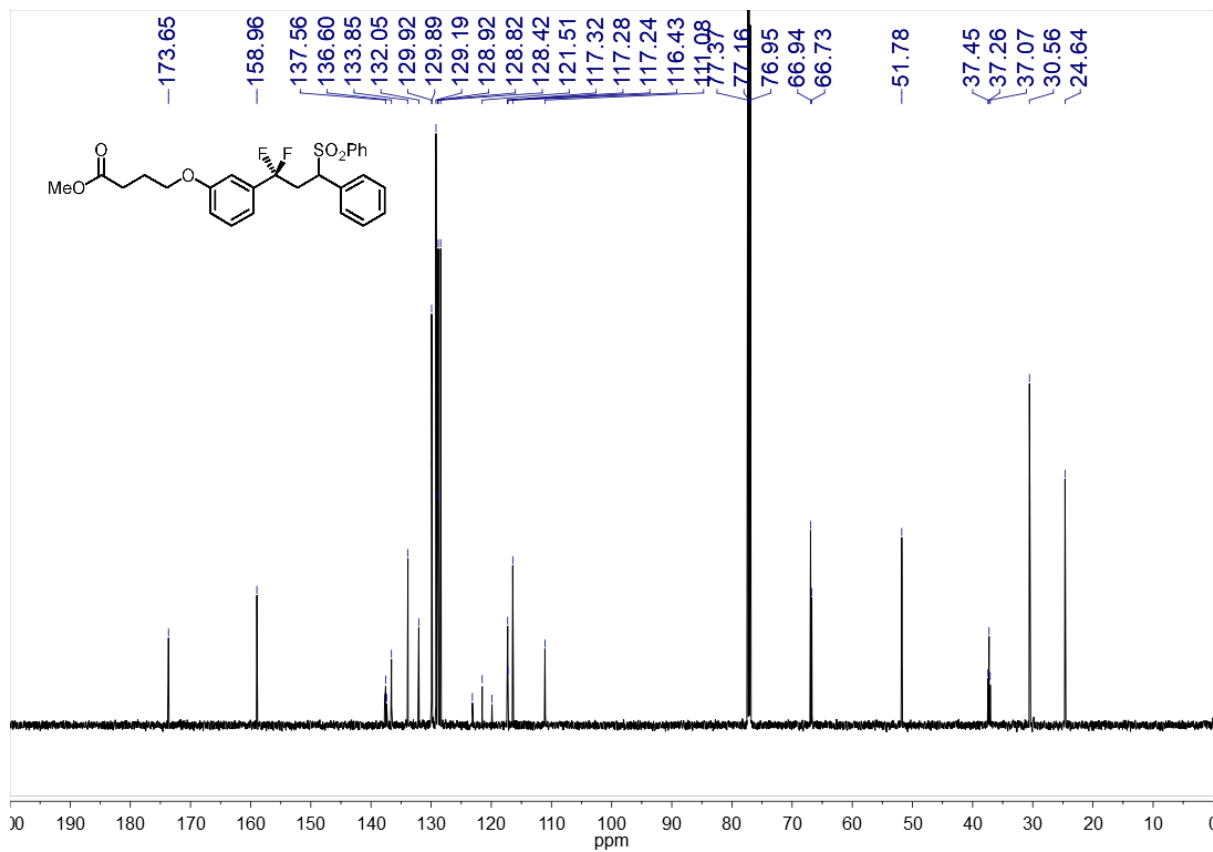

$^{13}\text{C}$  NMR spectrum (151 MHz,  $\text{CDCl}_3$ , 23 °C) of **5k**

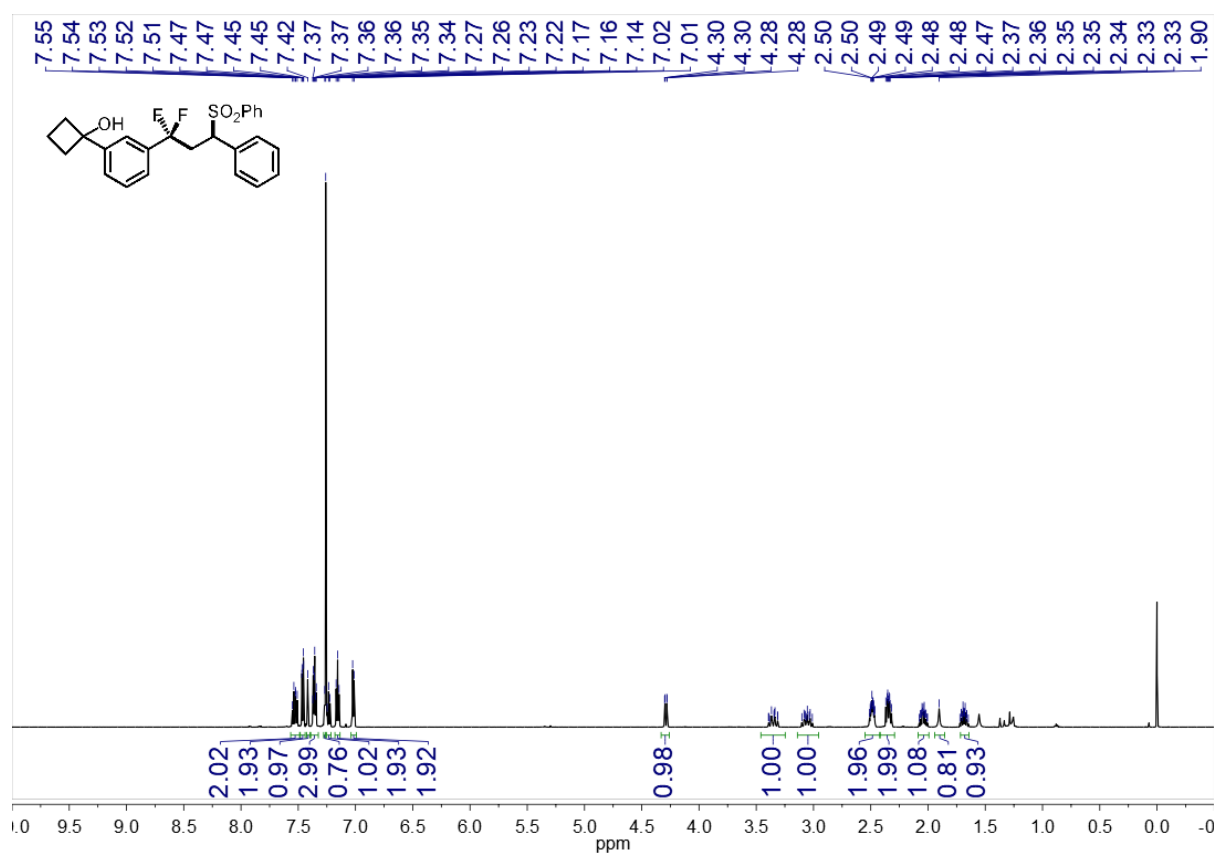

<sup>1</sup>H NMR spectrum (600 MHz, CDCl<sub>3</sub>, 23 °C) of **5I**

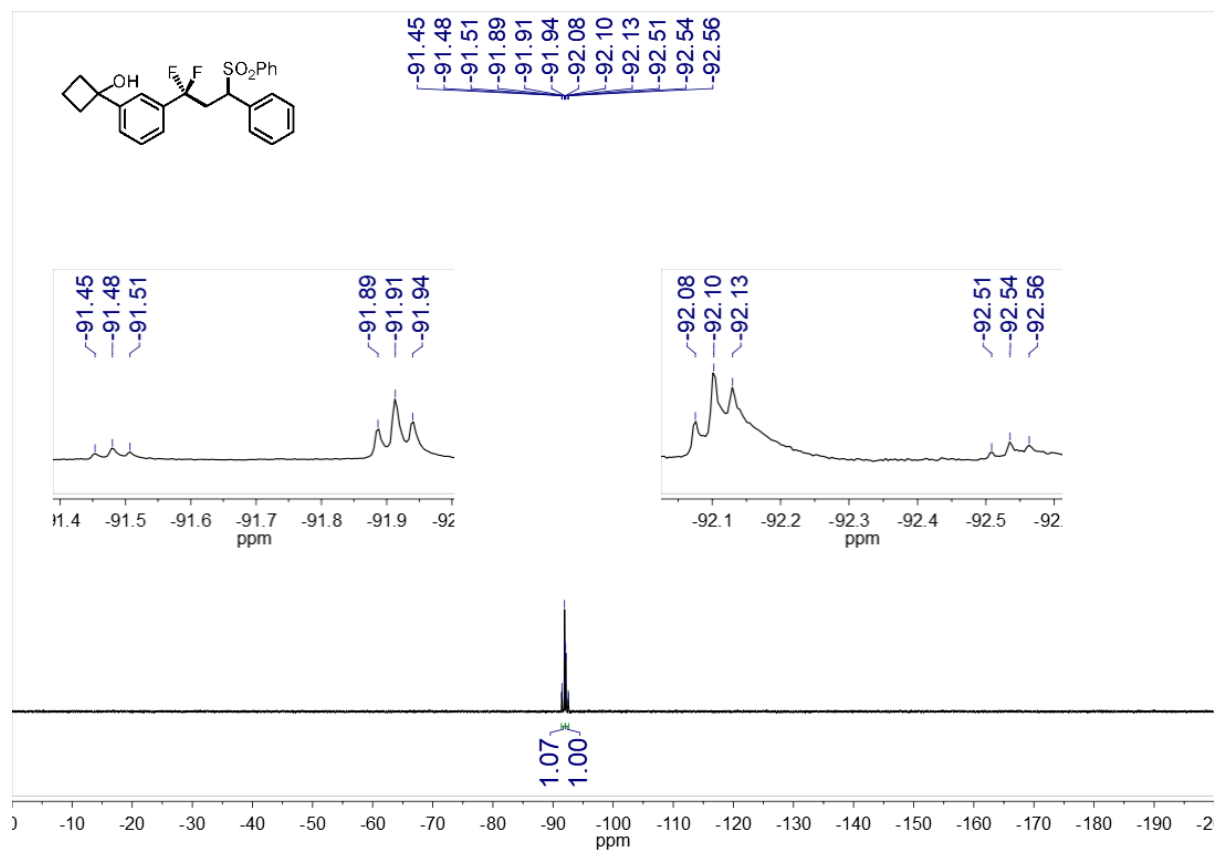

<sup>19</sup>F NMR spectrum (565 MHz, CDCl<sub>3</sub>, 23 °C) of **5I**

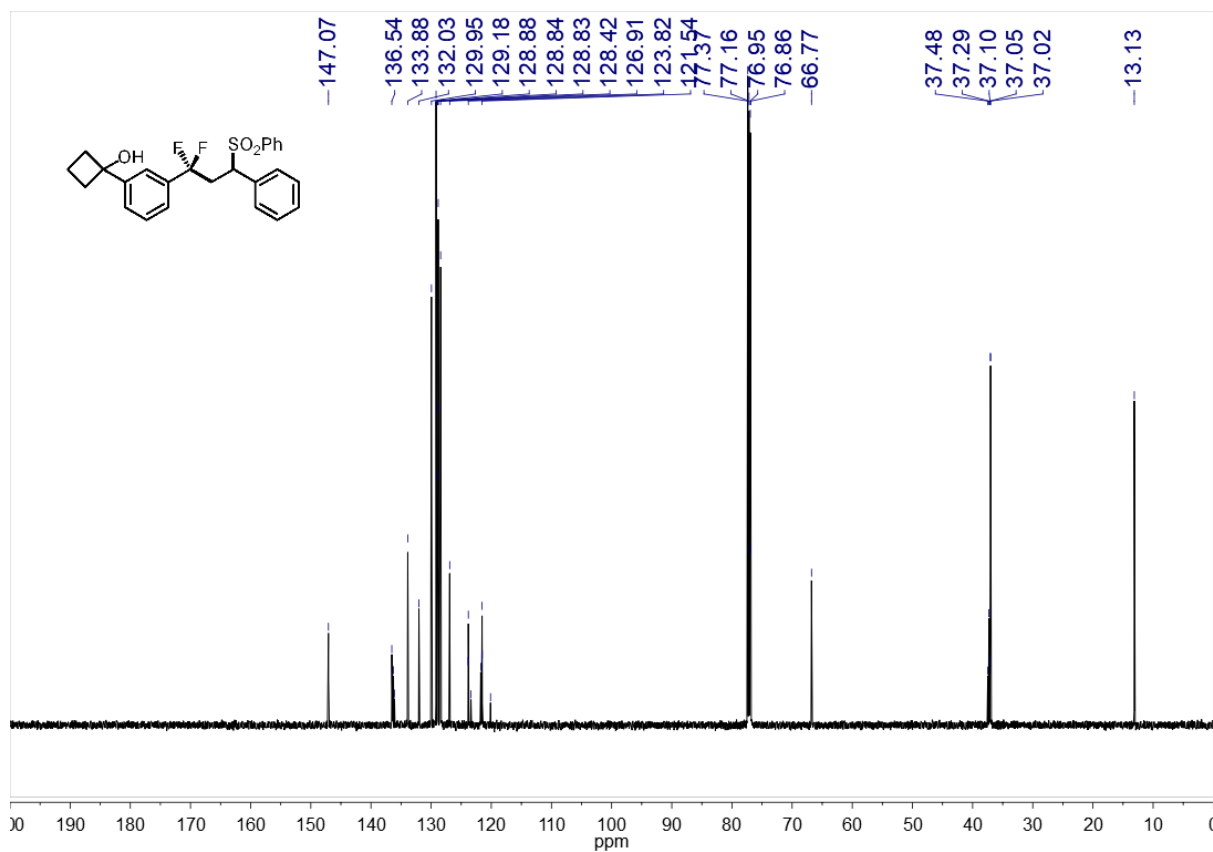

<sup>13</sup>C NMR spectrum (151 MHz, CDCl<sub>3</sub>, 23 °C) of **5l**

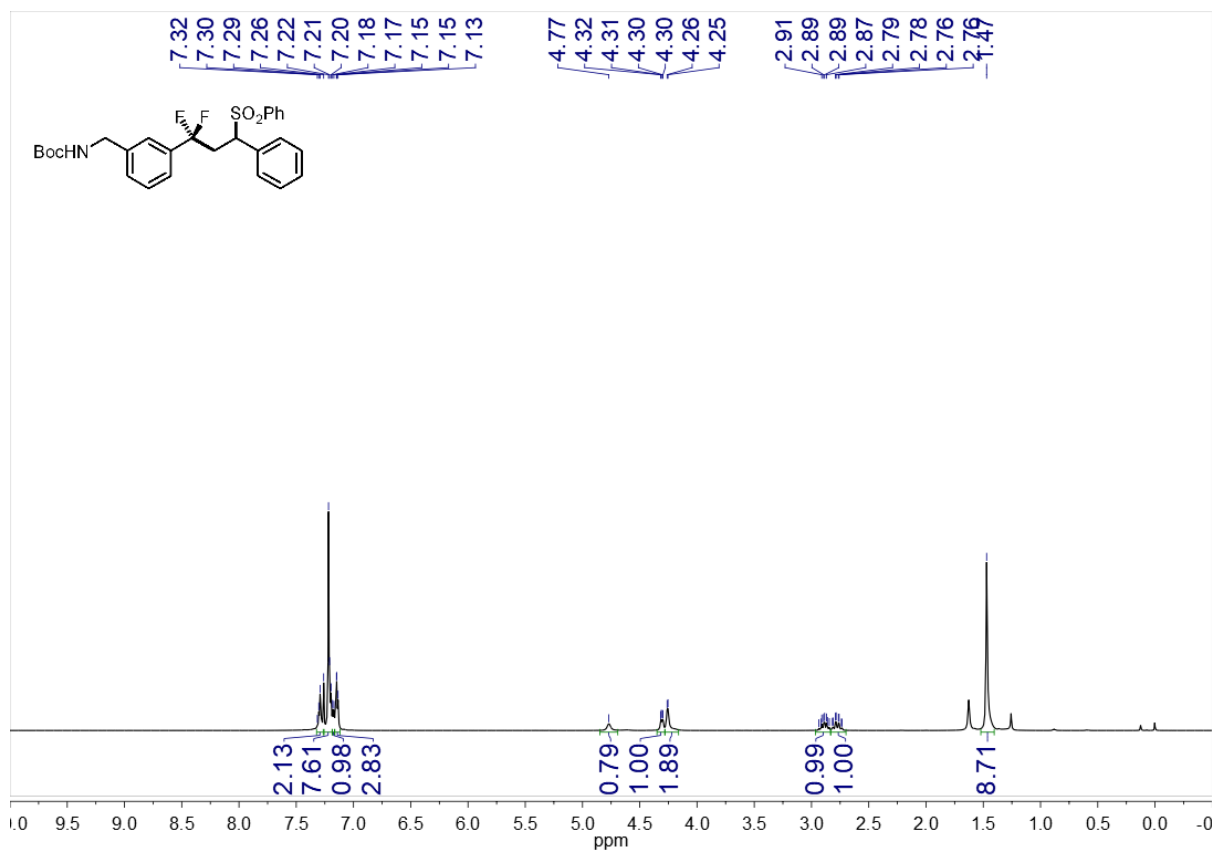

<sup>1</sup>H NMR spectrum (600 MHz, CDCl<sub>3</sub>, 23 °C) of **5m**



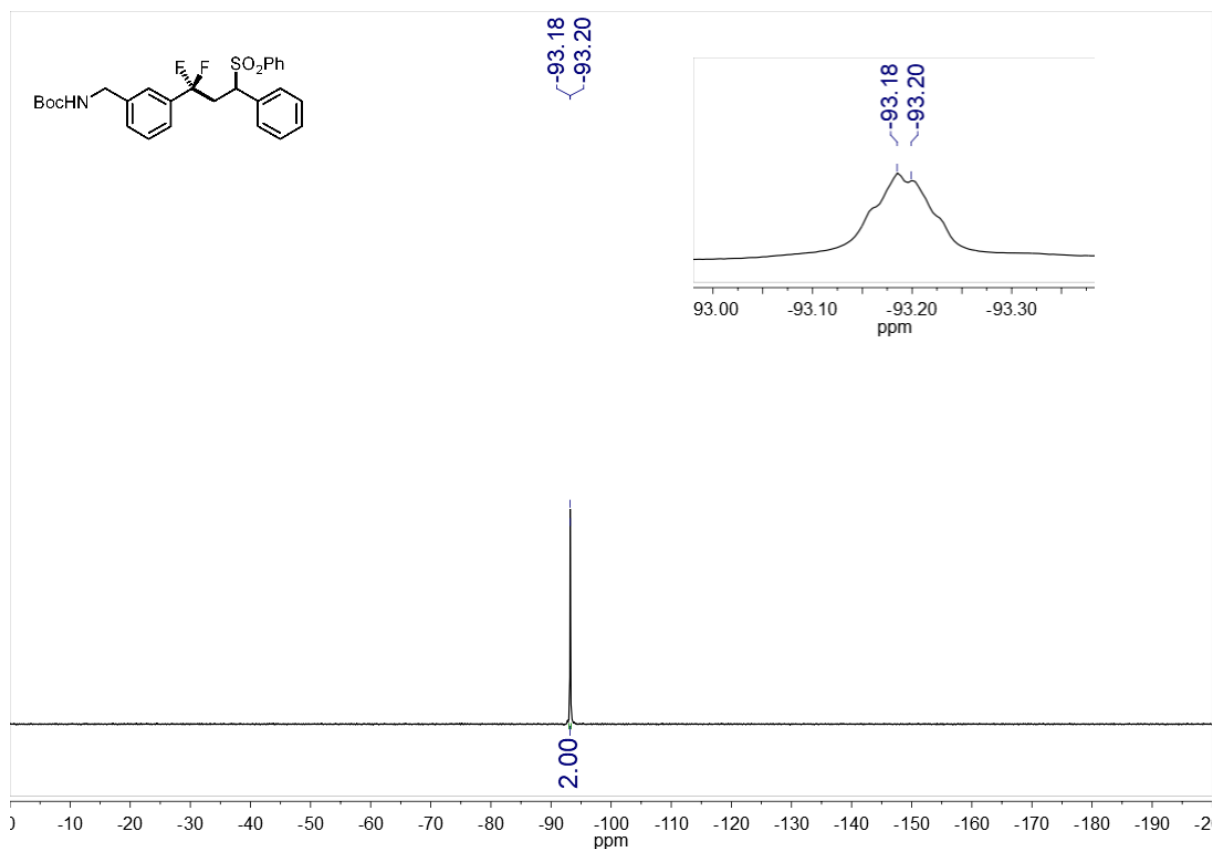

<sup>19</sup>F NMR spectrum (565 MHz, CDCl<sub>3</sub>, 23 °C) of **5m**

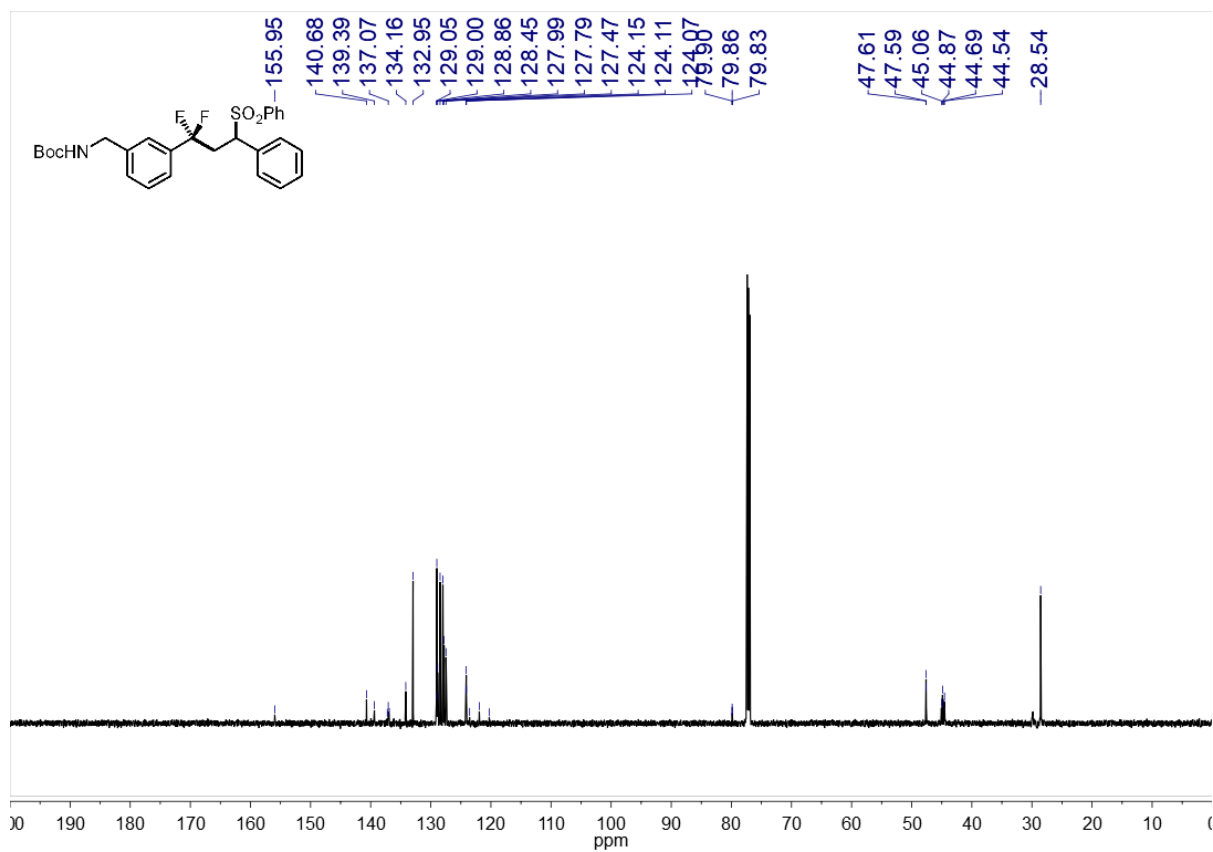

<sup>13</sup>C NMR spectrum (151 MHz, CDCl<sub>3</sub>, 23 °C) of **5m**

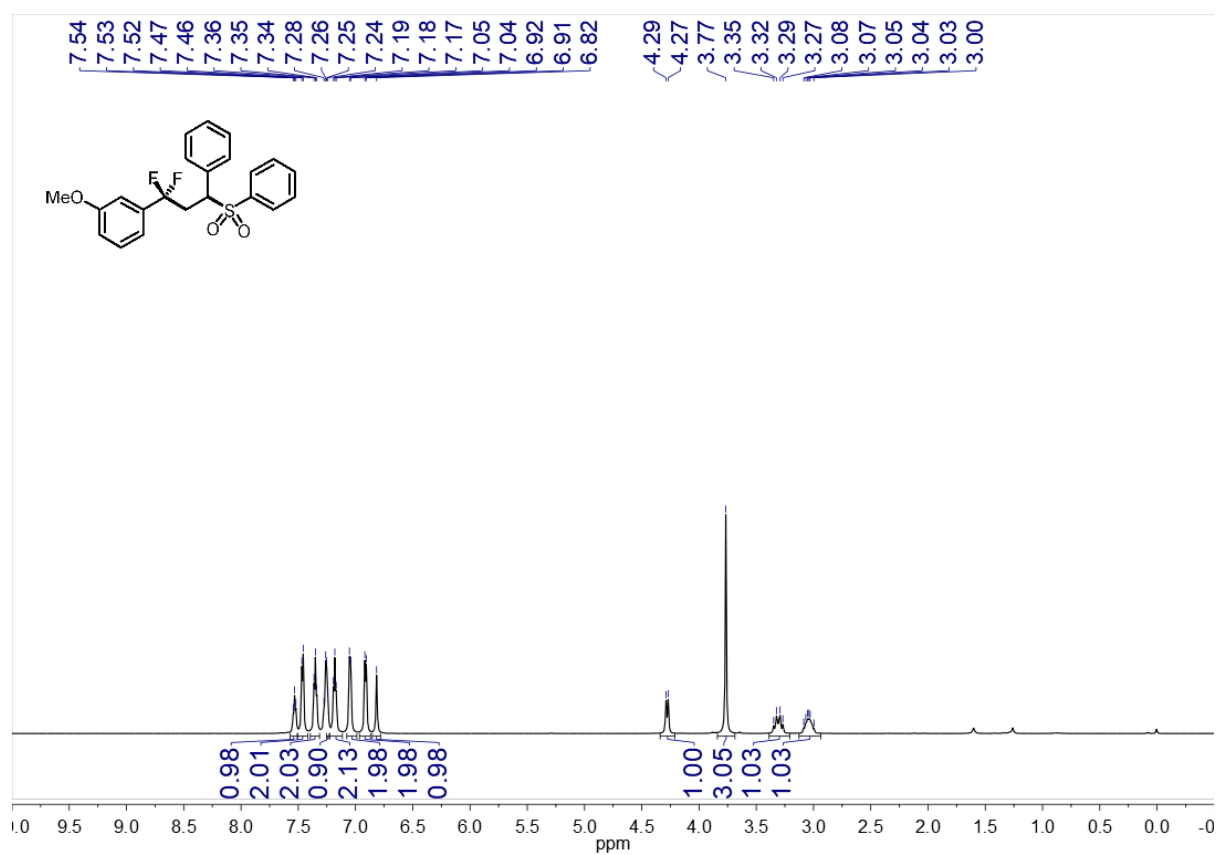

<sup>1</sup>H NMR spectrum (600 MHz, CDCl<sub>3</sub>, 23 °C) of **5n**

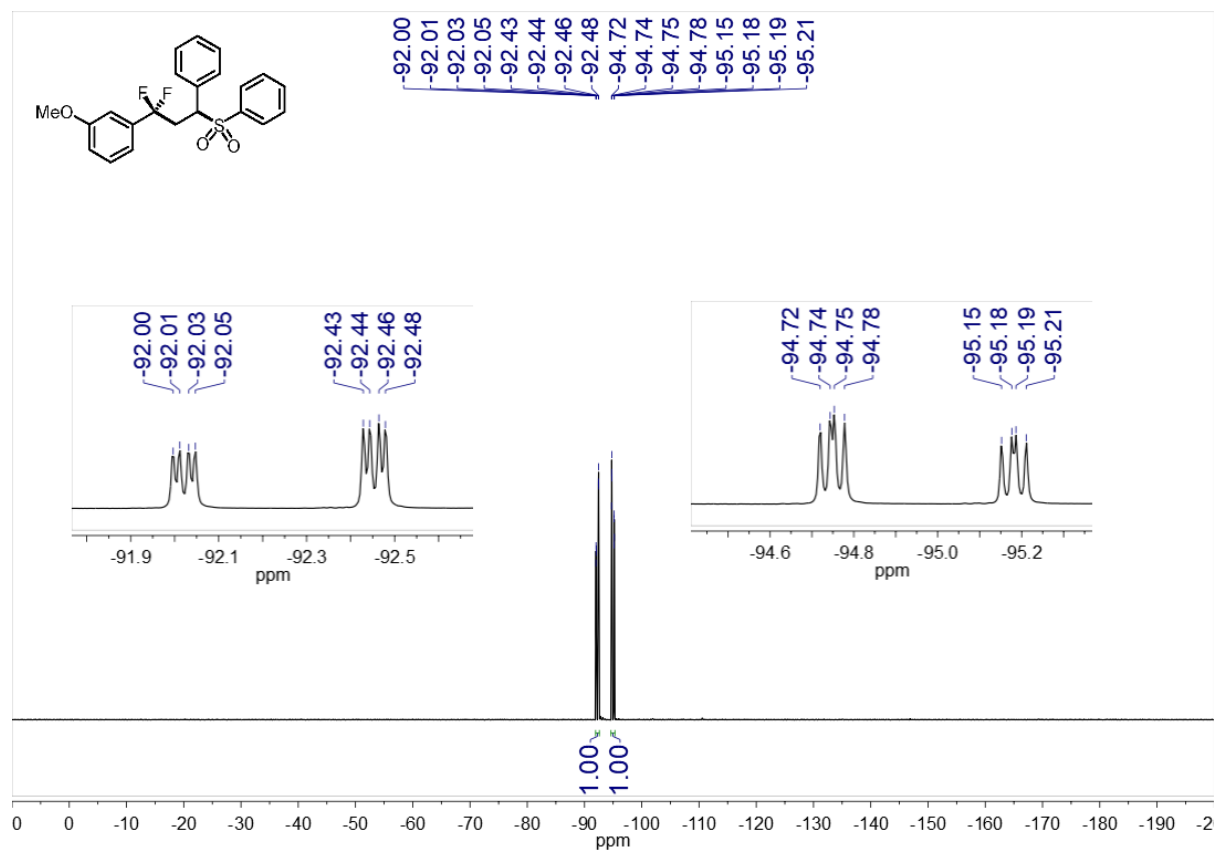

<sup>19</sup>F NMR spectrum (565 MHz, CDCl<sub>3</sub>, 23 °C) of **5n**

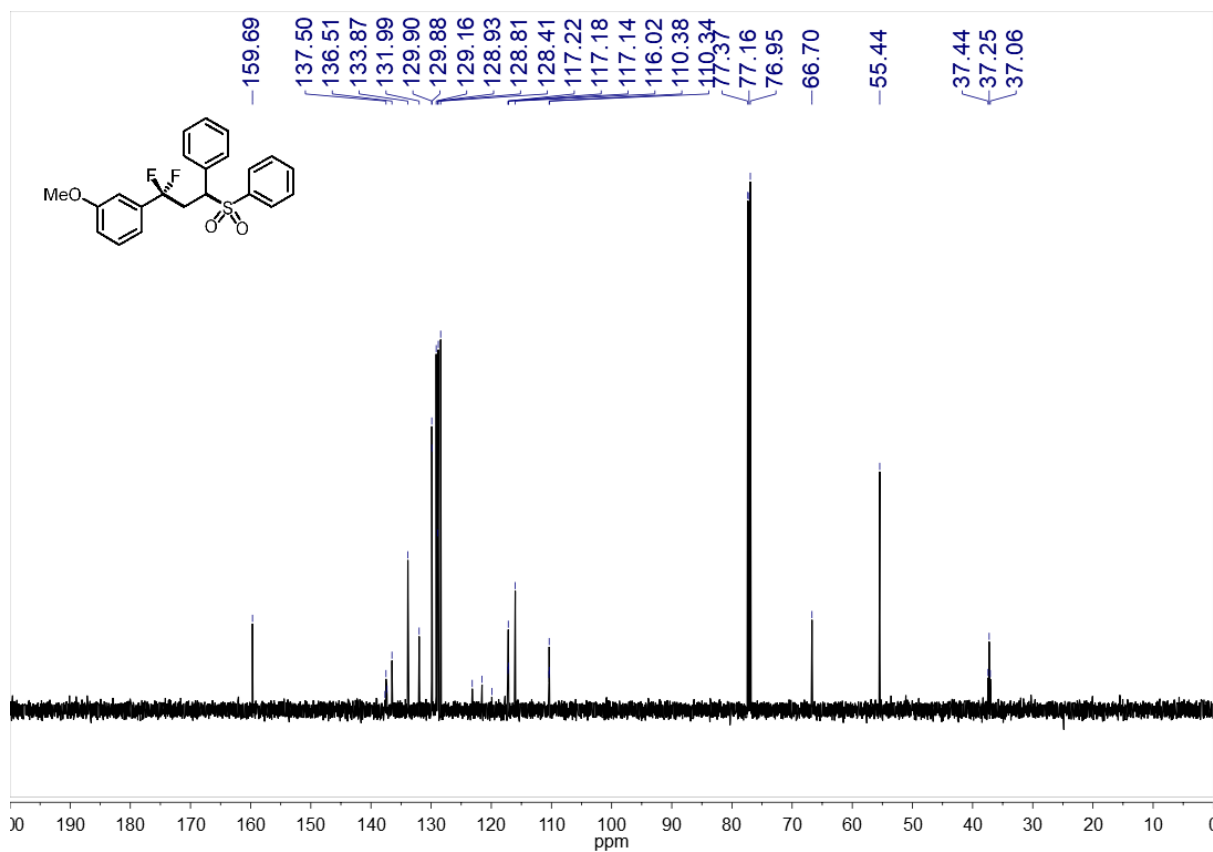

<sup>13</sup>C NMR spectrum (151 MHz, CDCl<sub>3</sub>, 23 °C) of **5n**

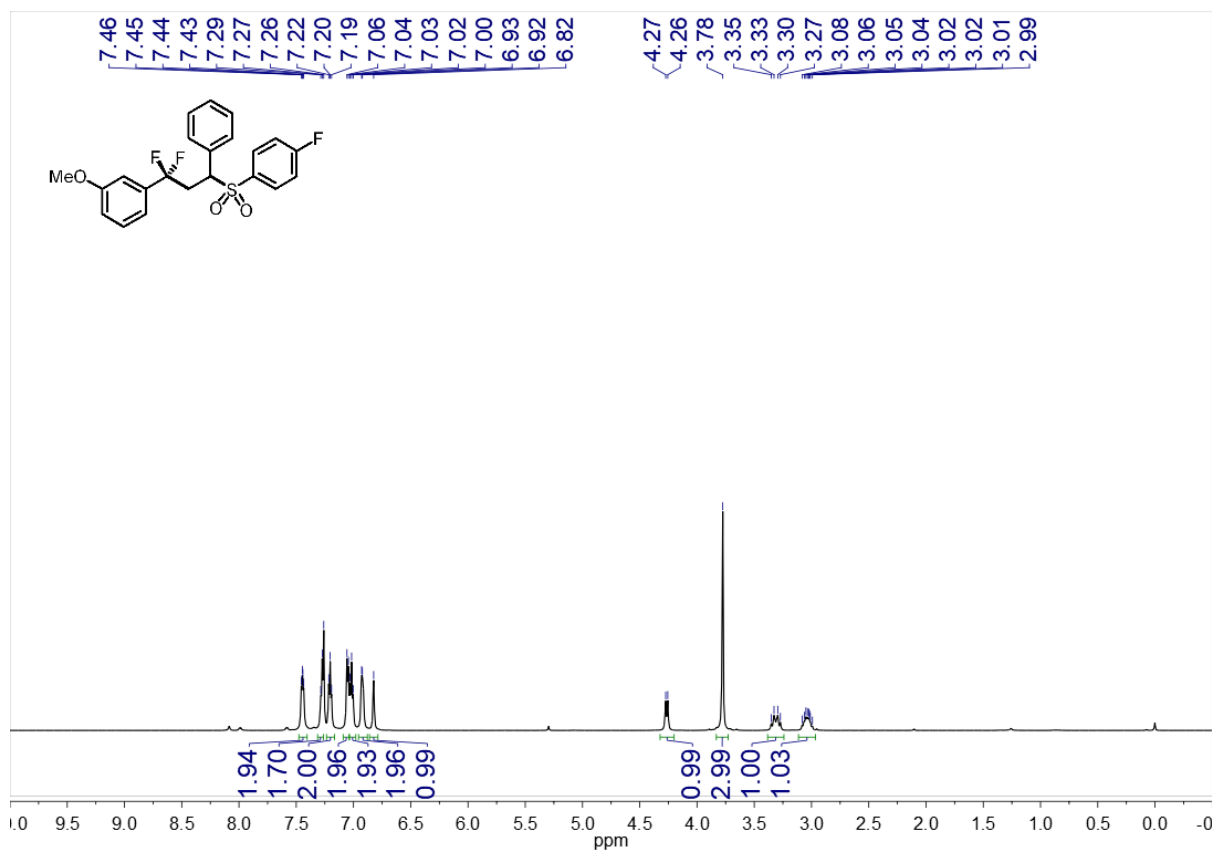

<sup>1</sup>H NMR spectrum (600 MHz, CDCl<sub>3</sub>, 23 °C) of **5o**

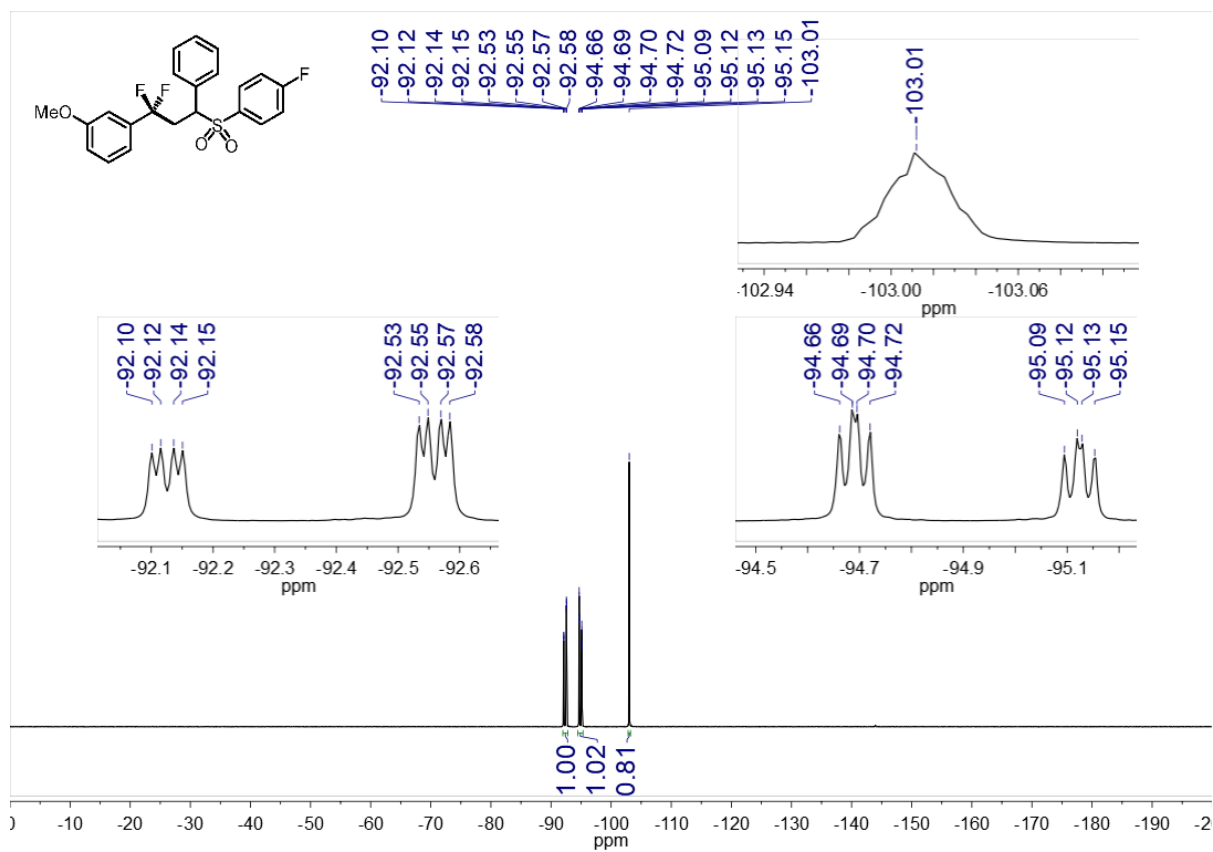

<sup>19</sup>F NMR spectrum (565 MHz, CDCl<sub>3</sub>, 23 °C) of **5o**

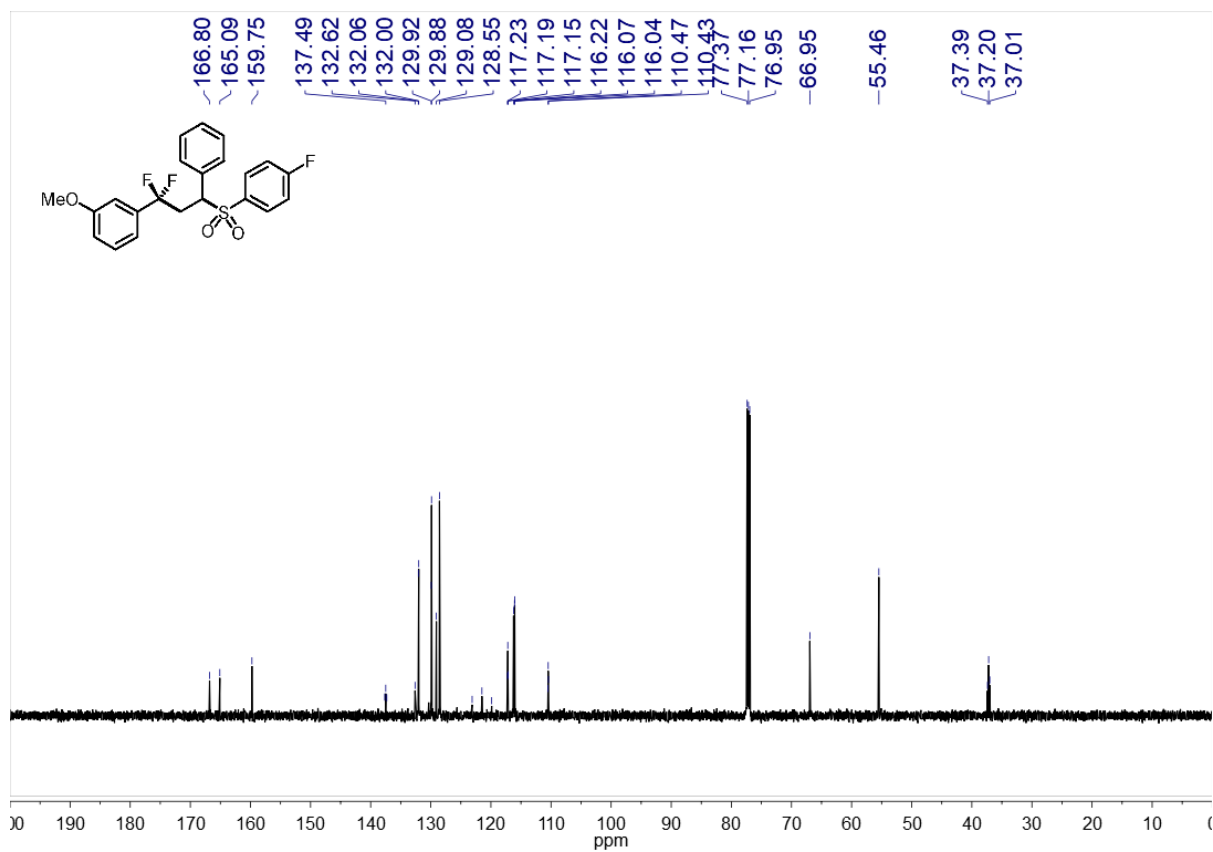

<sup>13</sup>C NMR spectrum (151 MHz, CDCl<sub>3</sub>, 23 °C) of **5o**

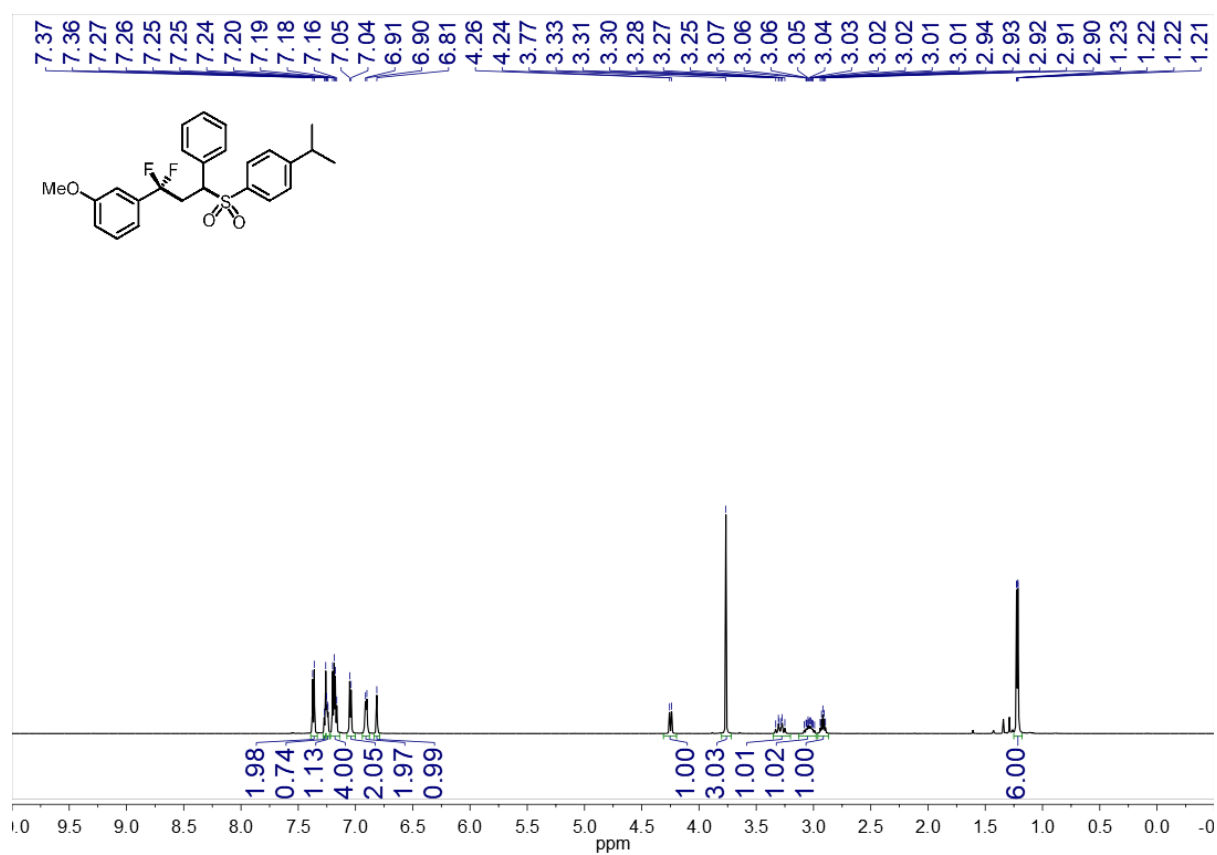

**<sup>1</sup>H NMR spectrum (600 MHz, CDCl<sub>3</sub>, 23 °C) of **5p****

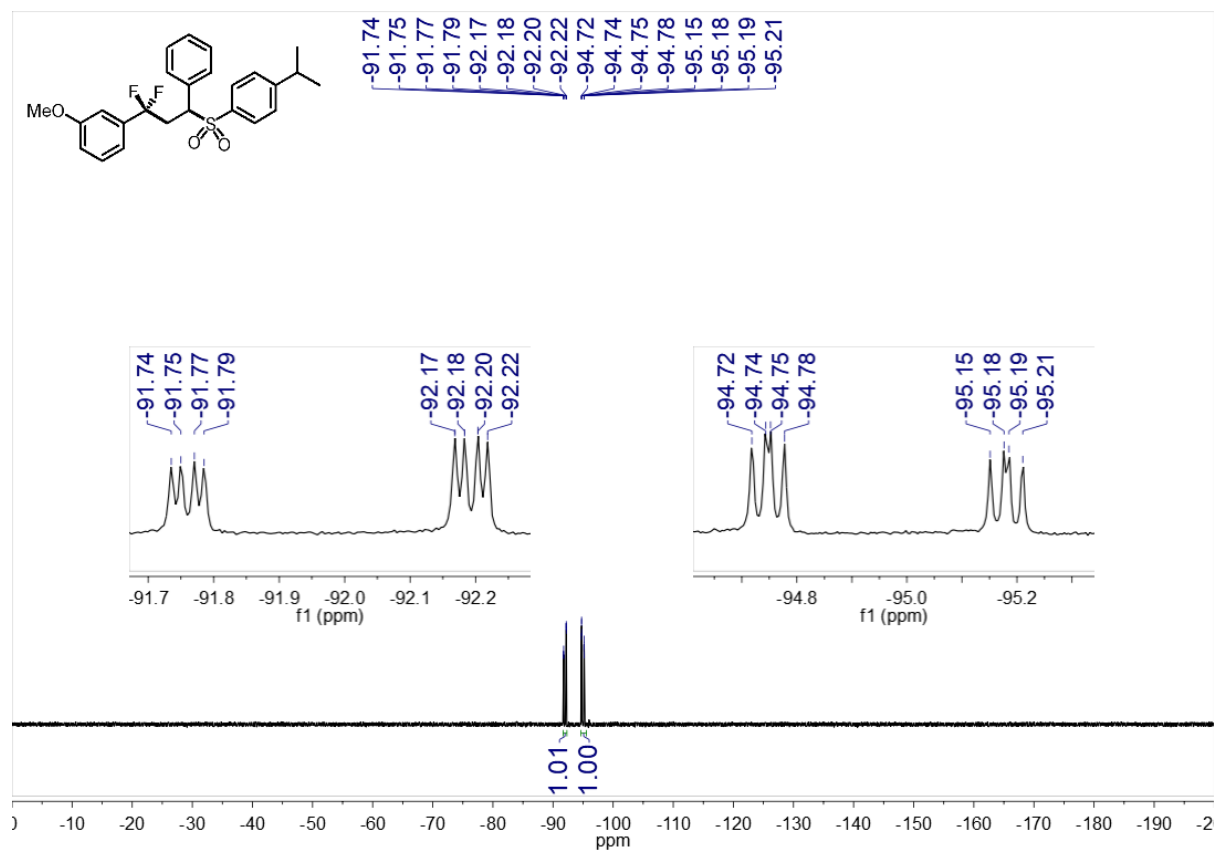

**<sup>19</sup>F NMR spectrum (565 MHz, CDCl<sub>3</sub>, 23 °C) of **5p****

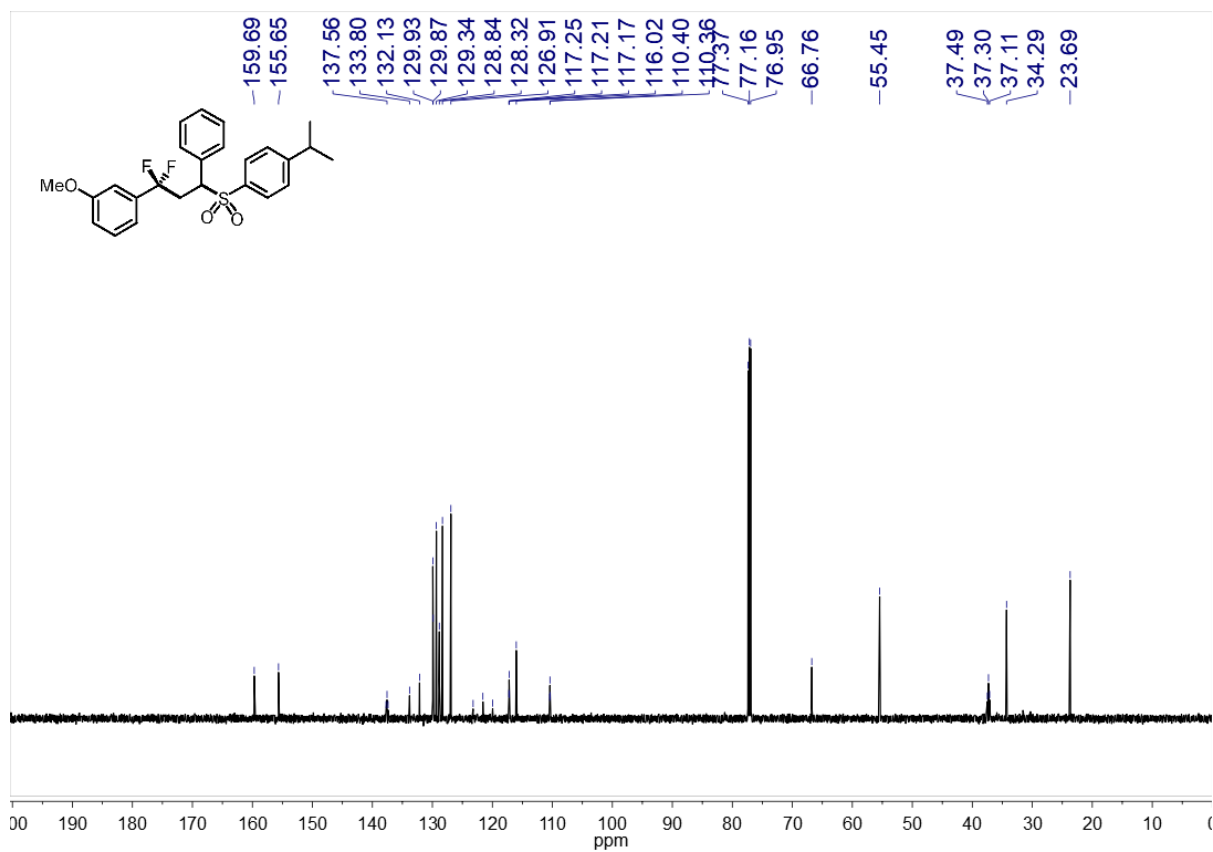

<sup>13</sup>C NMR spectrum (151 MHz, CDCl<sub>3</sub>, 23 °C) of **5p**

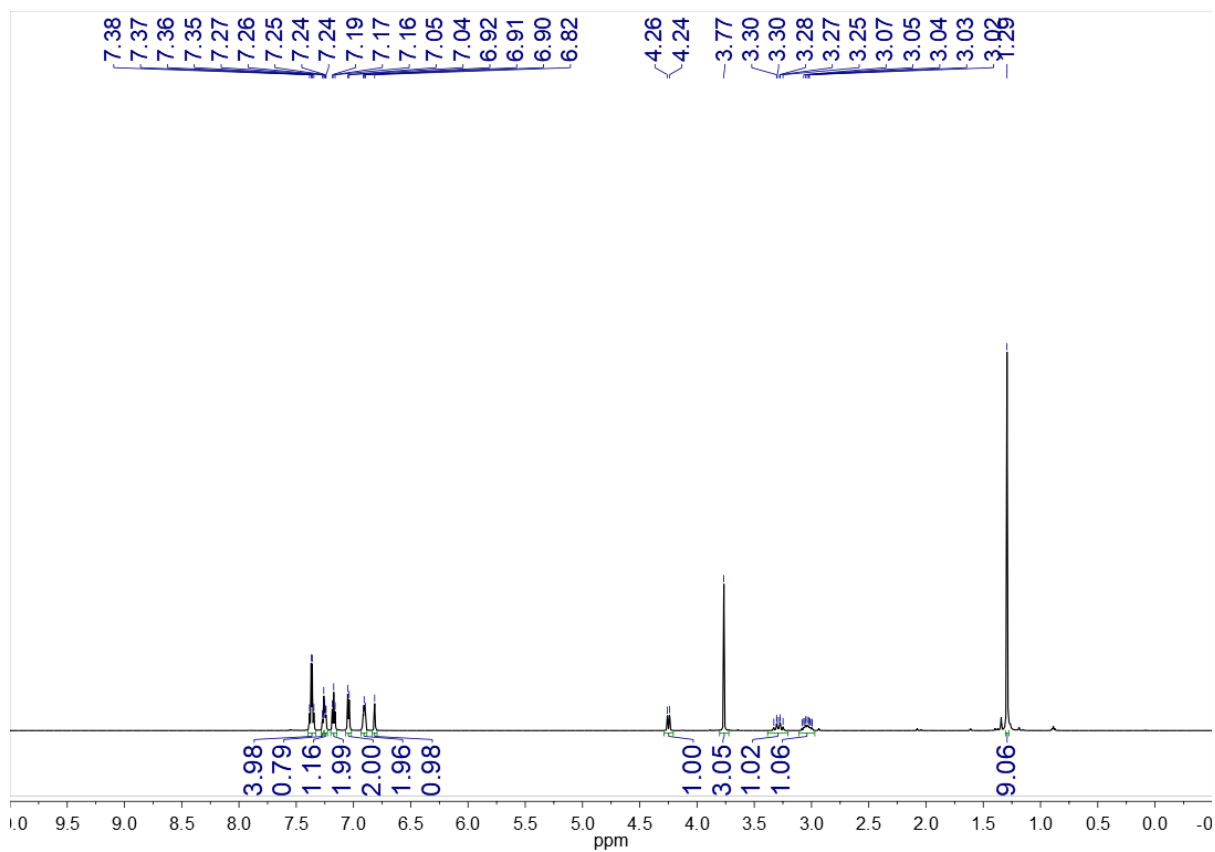

<sup>1</sup>H NMR spectrum (600 MHz, CDCl<sub>3</sub>, 23 °C) of **5q**

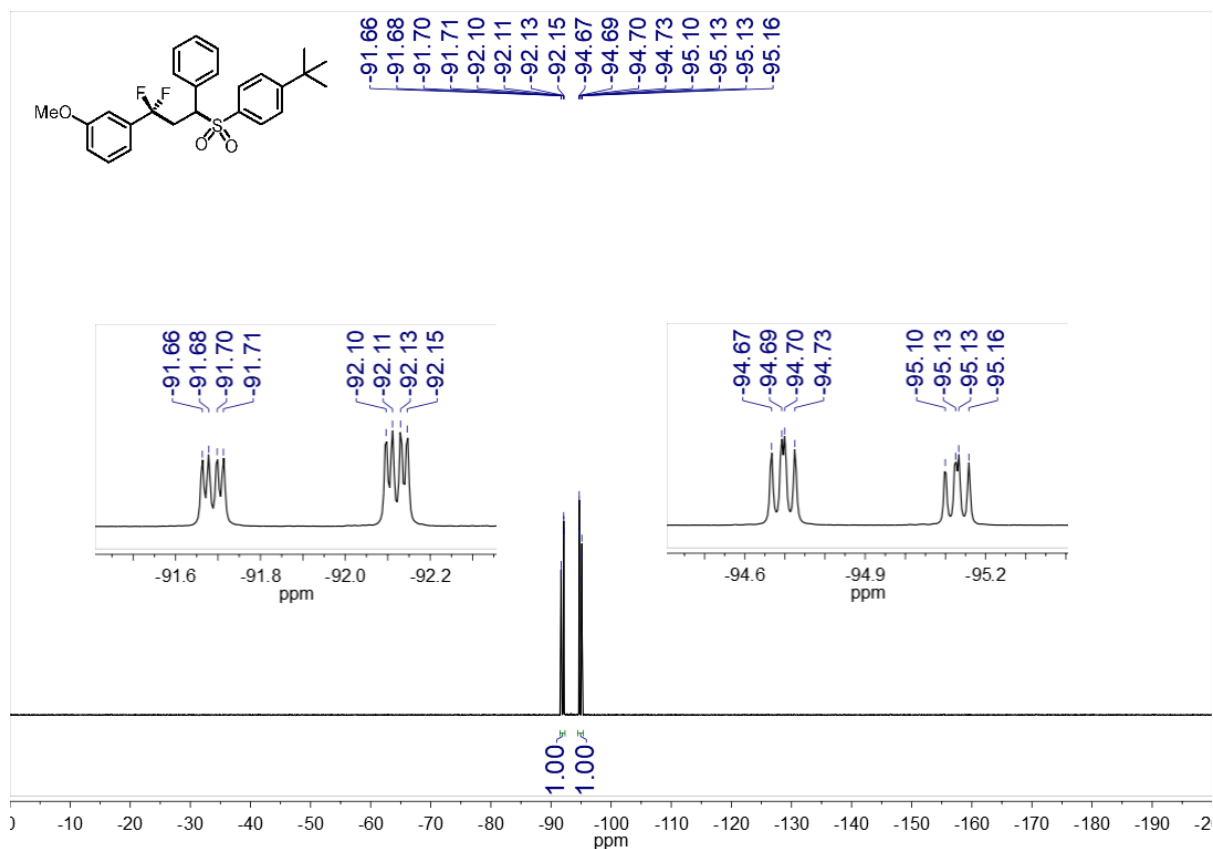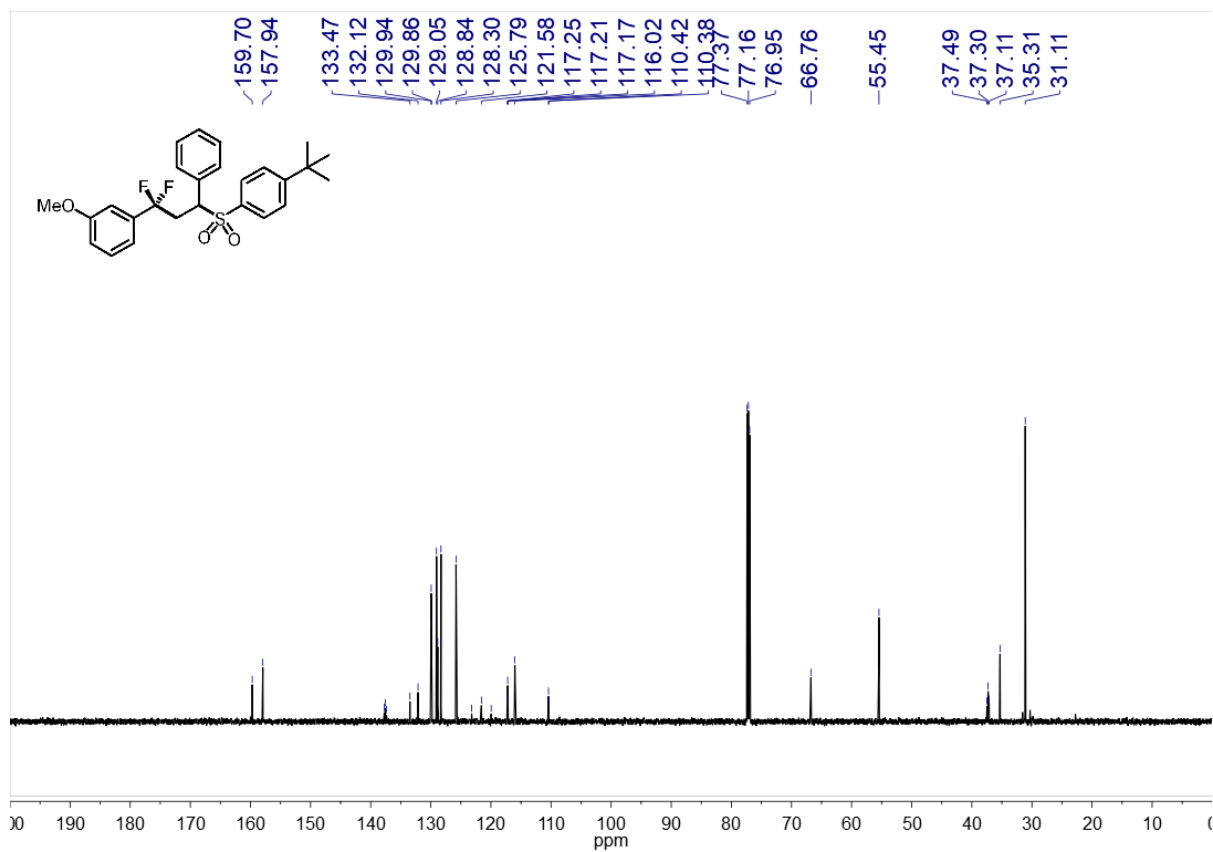

$^{13}\text{C}$  NMR spectrum (151 MHz,  $\text{CDCl}_3$ , 23 °C) of **5q**

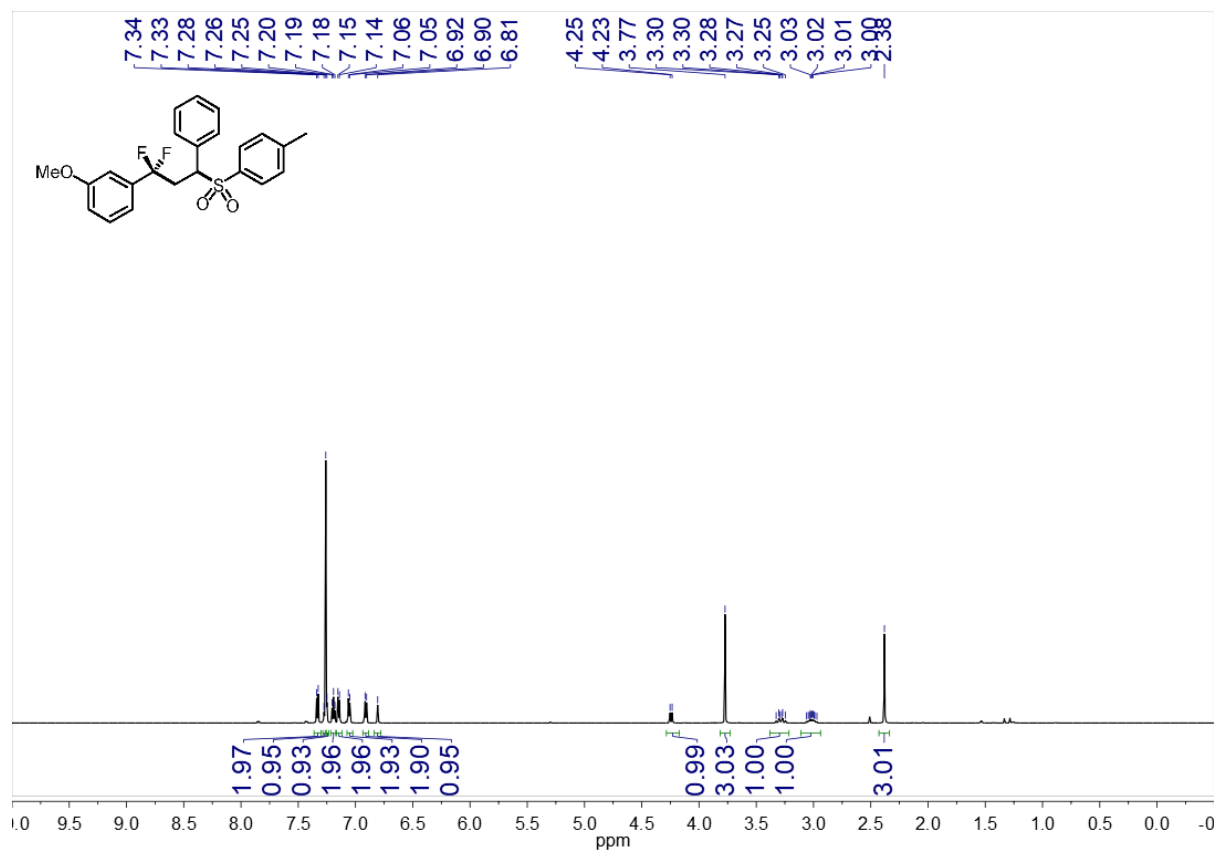

<sup>1</sup>H NMR spectrum (600 MHz, CDCl<sub>3</sub>, 23 °C) of **5r**

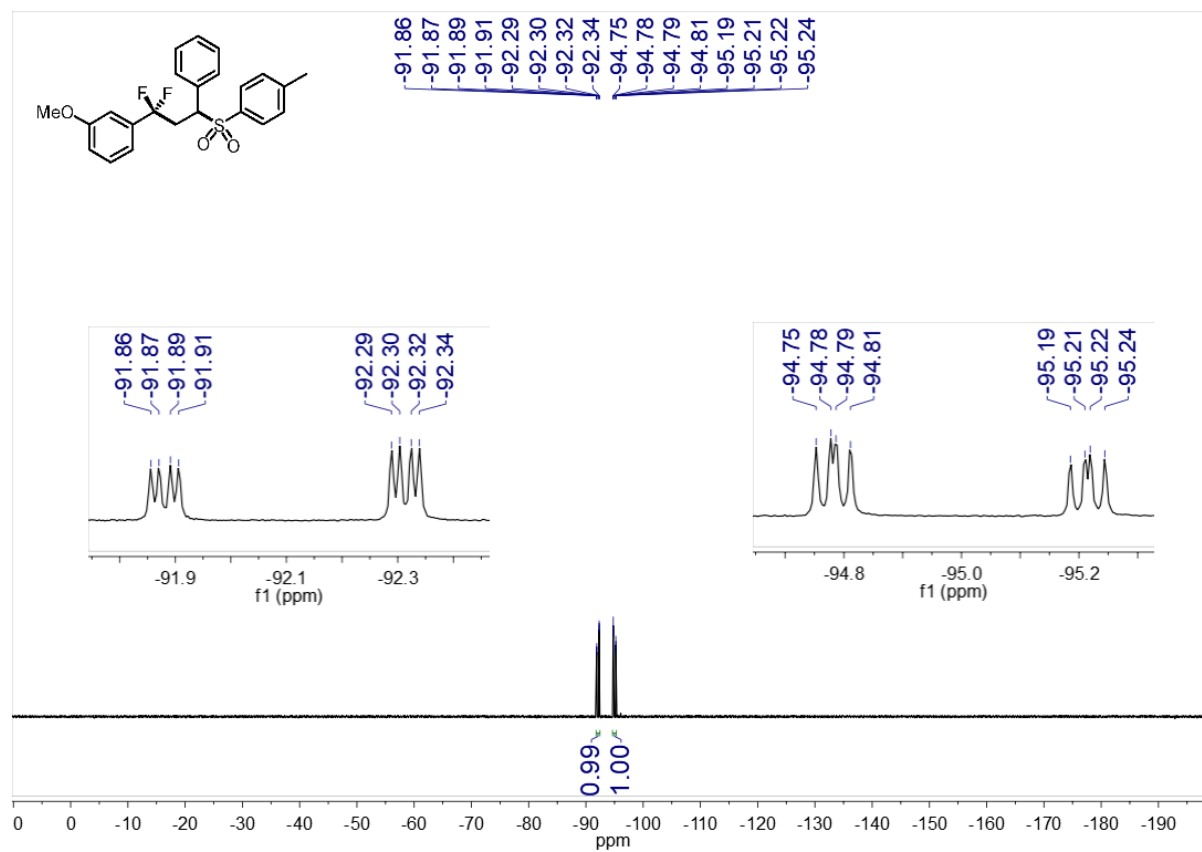

<sup>19</sup>F NMR spectrum (565 MHz, CDCl<sub>3</sub>, 23 °C) of **5r**



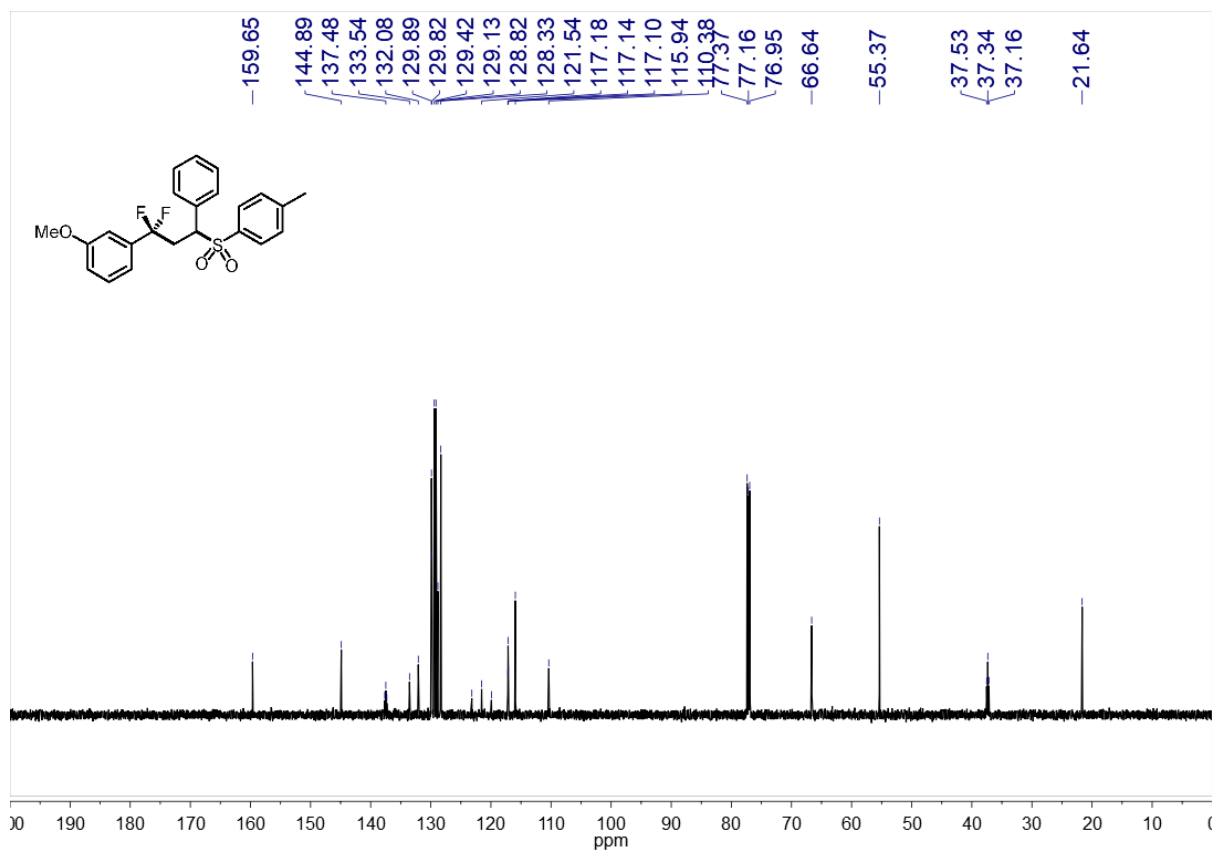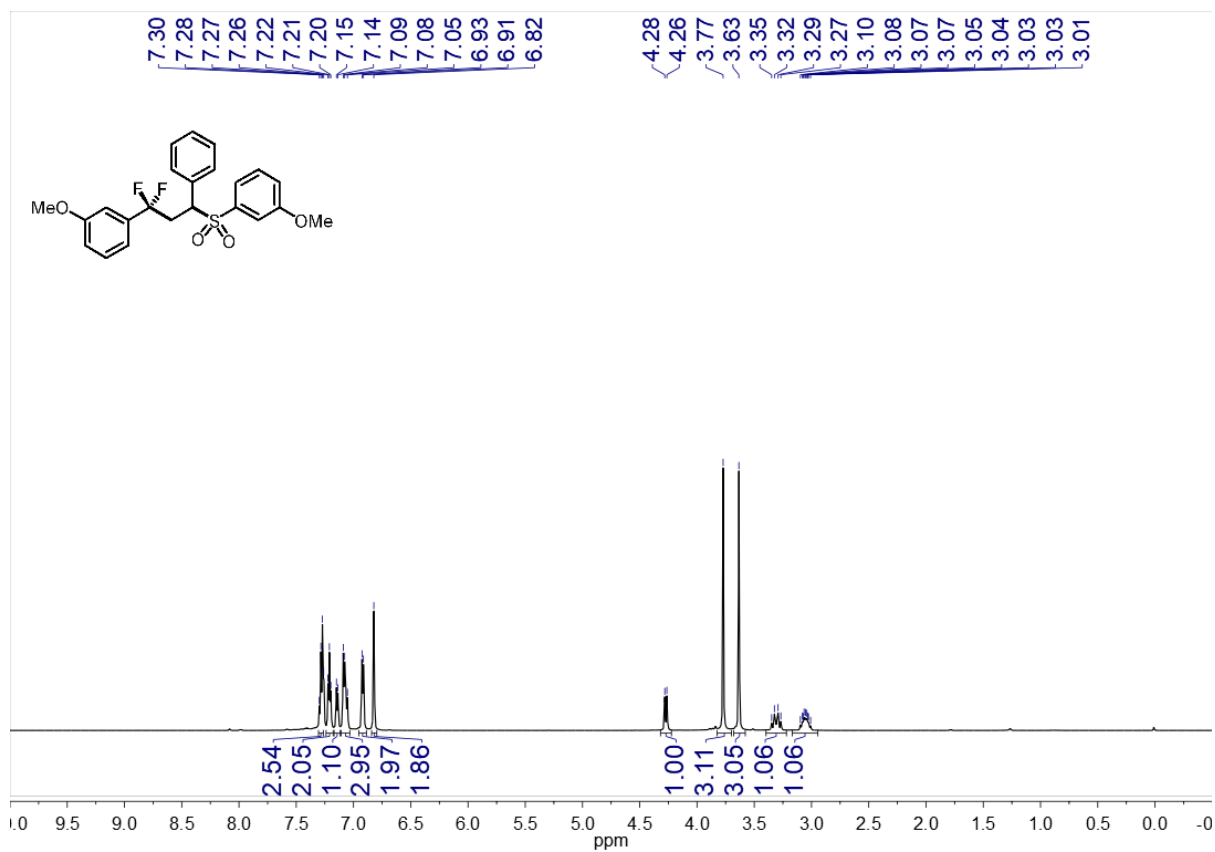

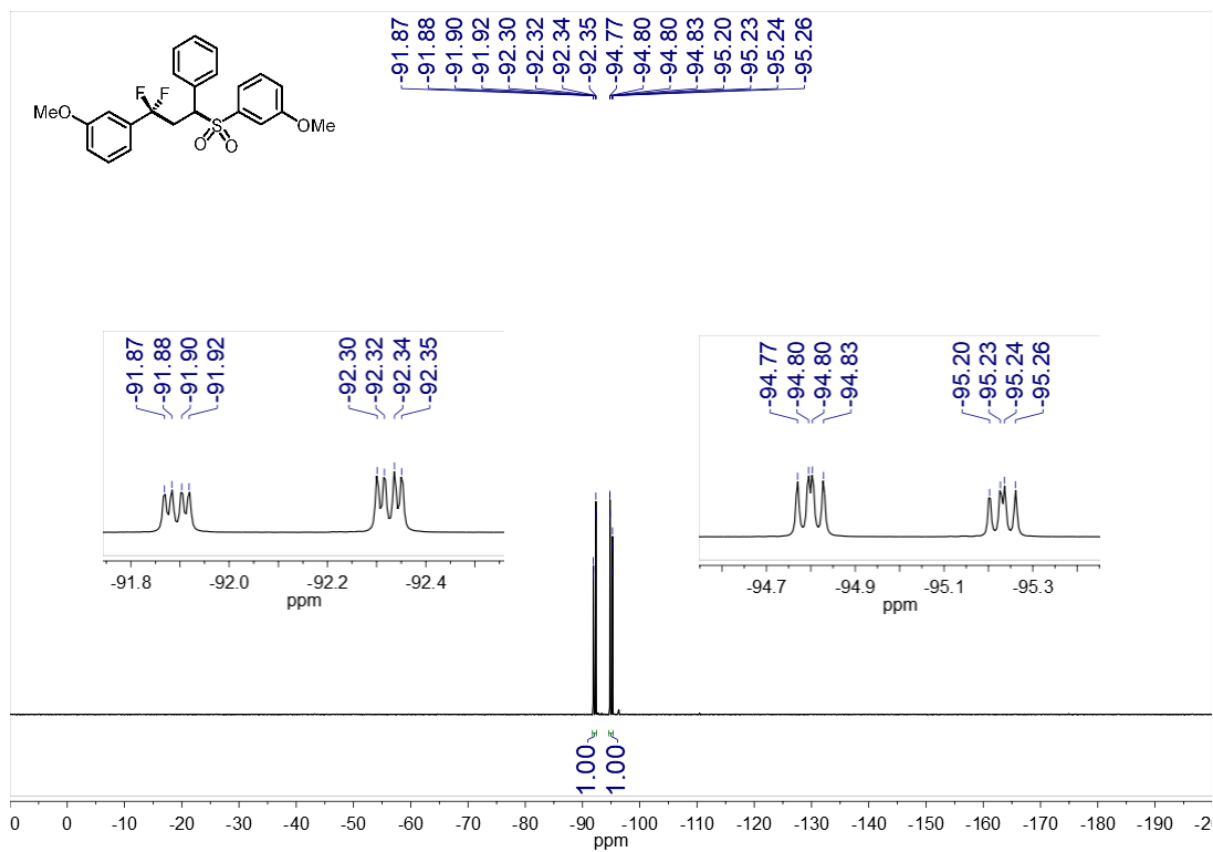

<sup>19</sup>F NMR spectrum (565 MHz, CDCl<sub>3</sub>, 23 °C) of **5s**

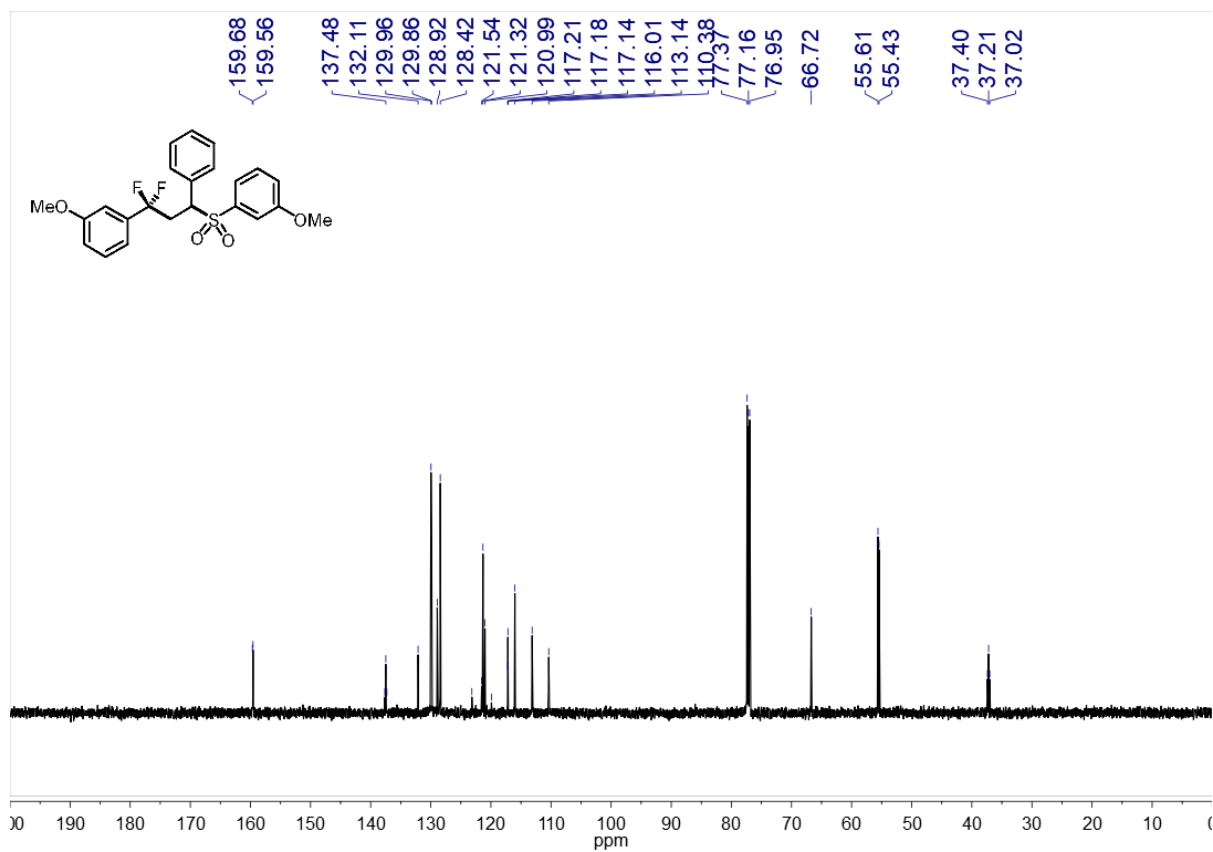

<sup>13</sup>C NMR spectrum (151 MHz, CDCl<sub>3</sub>, 23 °C) of **5s**

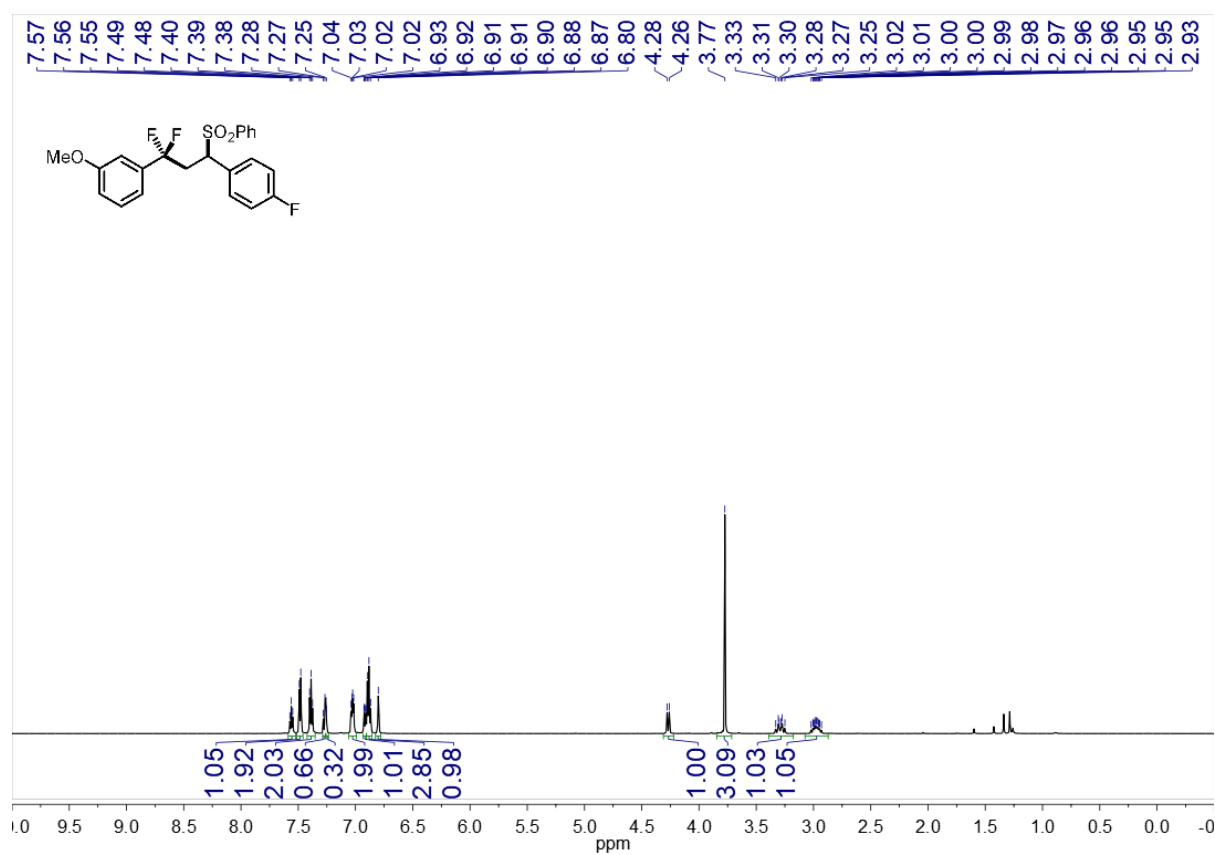

<sup>1</sup>H NMR spectrum (600 MHz, CDCl<sub>3</sub>, 23 °C) of **5t**

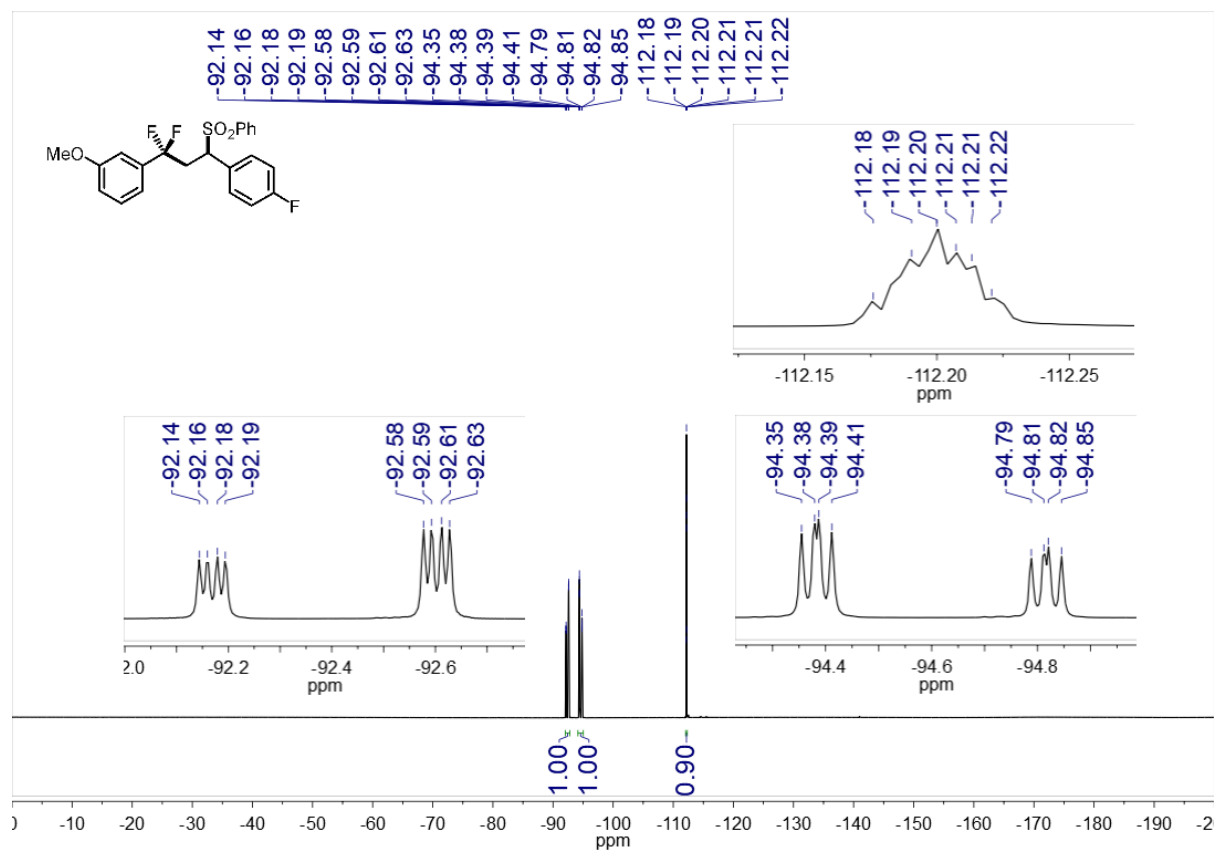

<sup>19</sup>F NMR spectrum (565 MHz, CDCl<sub>3</sub>, 23 °C) of **5t**

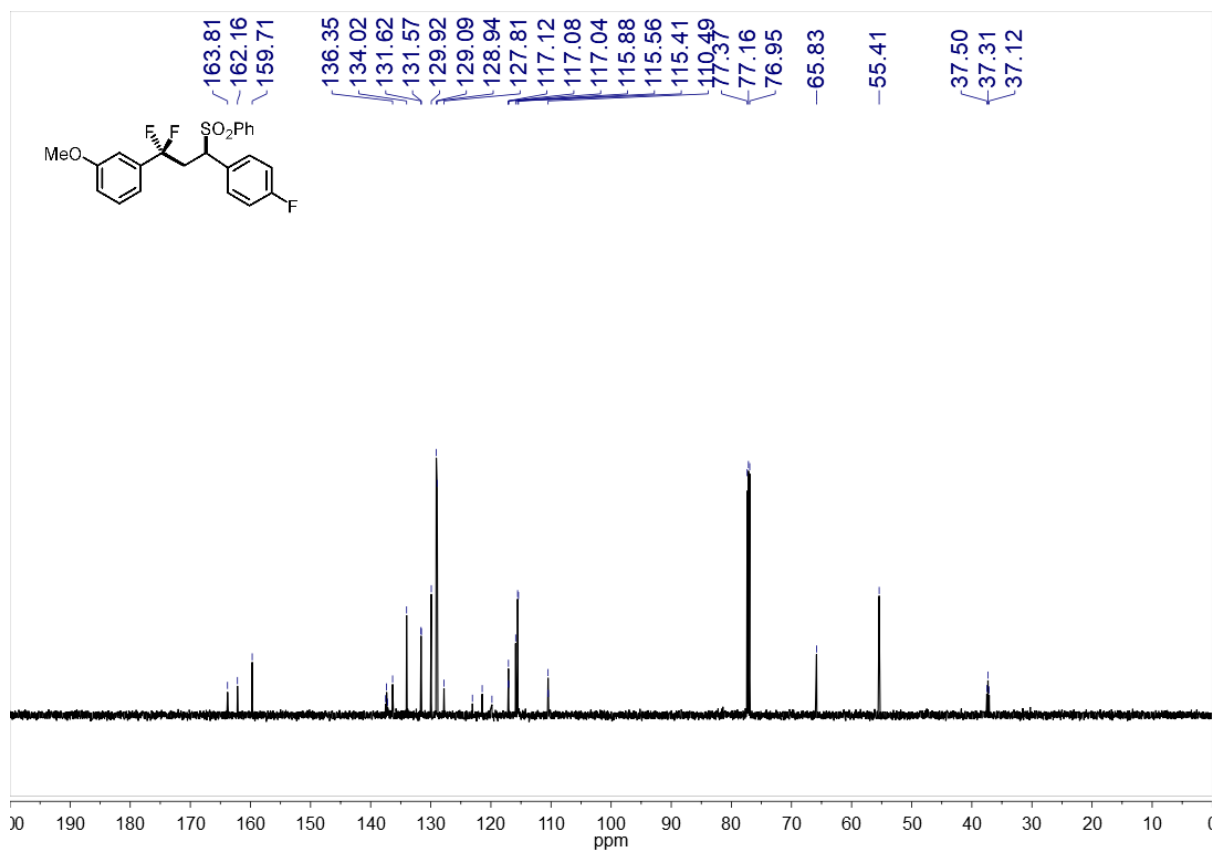

<sup>13</sup>C NMR spectrum (151 MHz, CDCl<sub>3</sub>, 23 °C) of **5t**

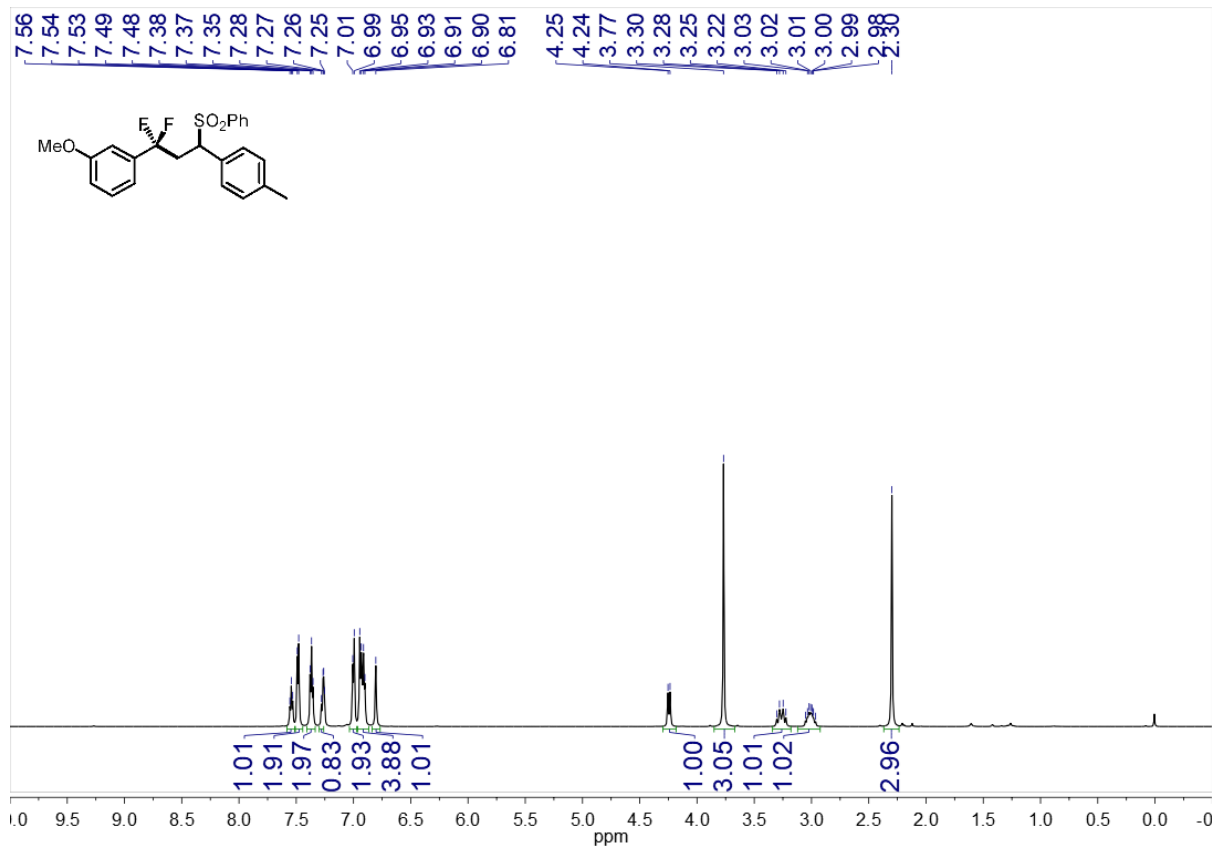

<sup>1</sup>H NMR spectrum (600 MHz, CDCl<sub>3</sub>, 23 °C) of **5u**

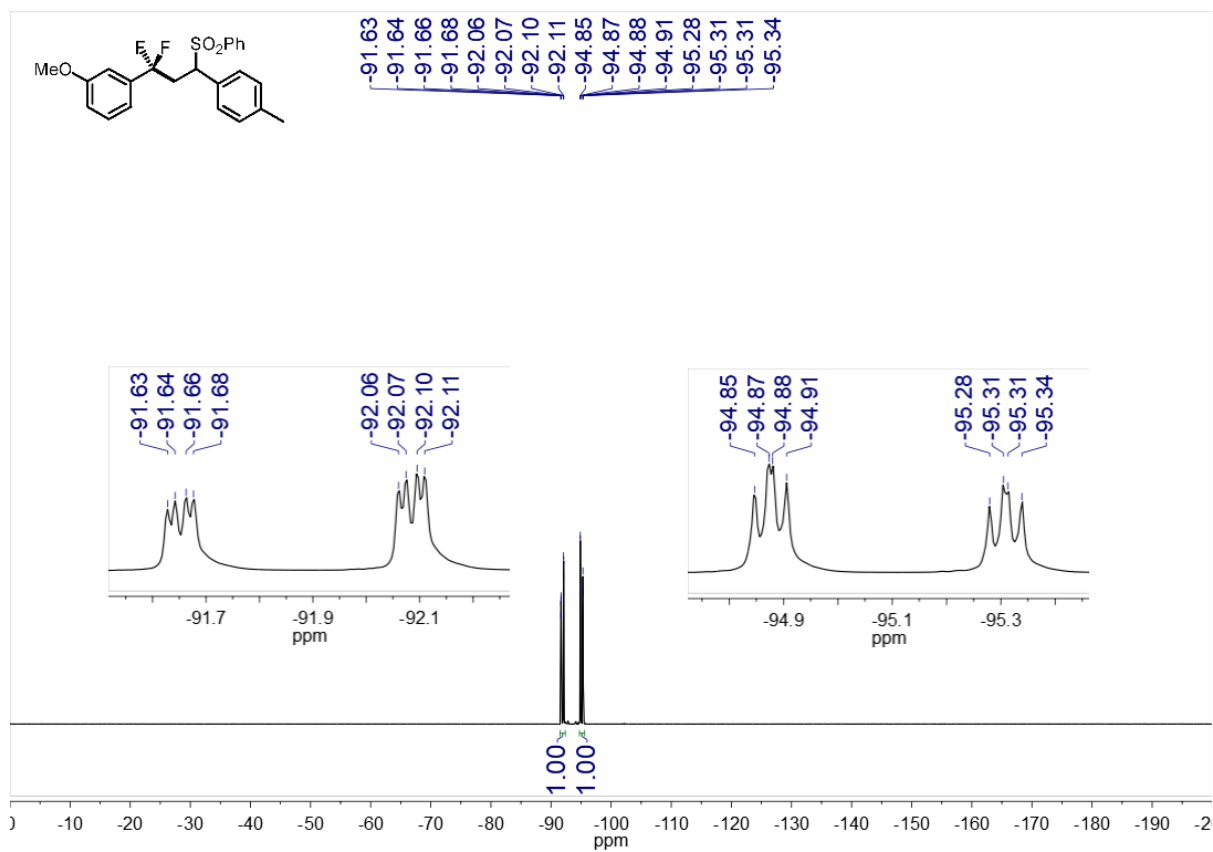

<sup>19</sup>F NMR spectrum (565 MHz, CDCl<sub>3</sub>, 23 °C) of **5u**

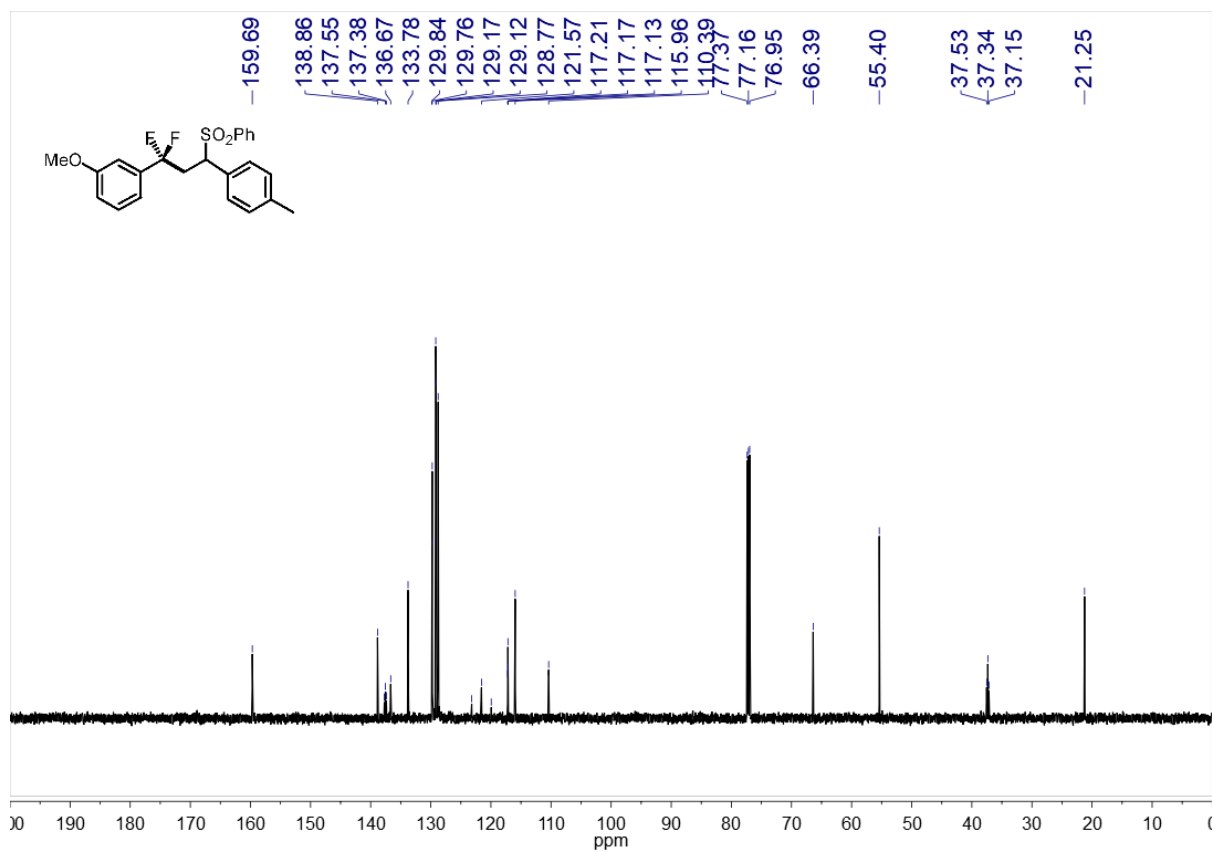

<sup>13</sup>C NMR spectrum (151 MHz, CDCl<sub>3</sub>, 23 °C) of **5u**

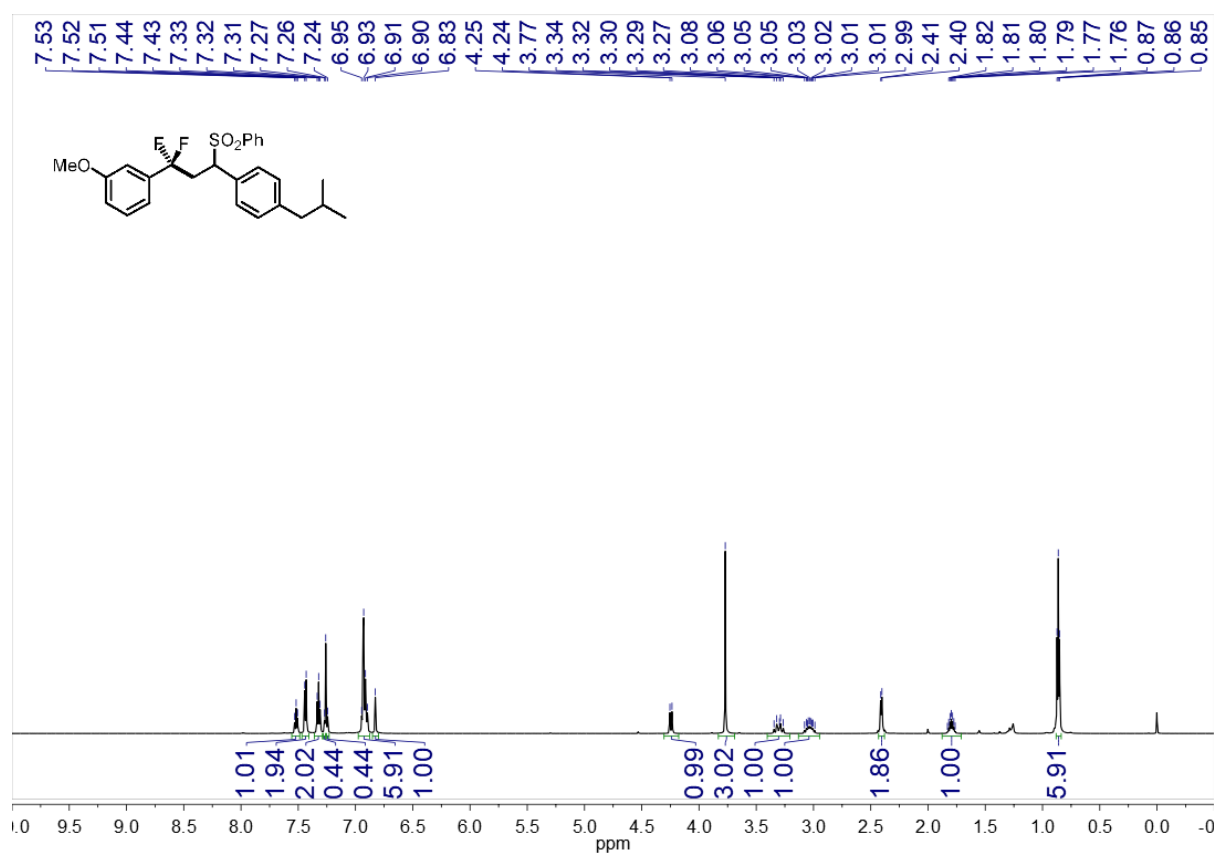

**<sup>1</sup>H NMR spectrum (600 MHz, CDCl<sub>3</sub>, 23 °C) of **5v****

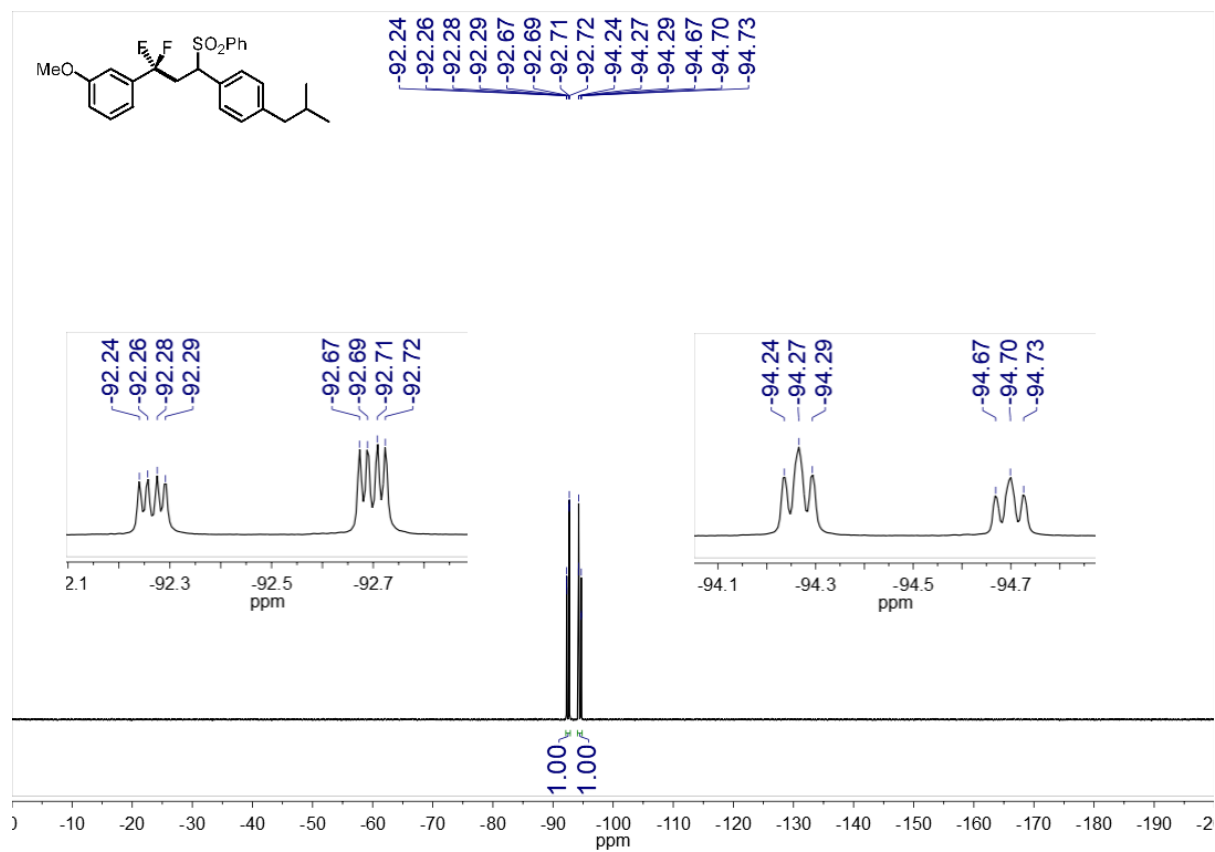

**<sup>19</sup>F NMR spectrum (565 MHz, CDCl<sub>3</sub>, 23 °C) of **5v****

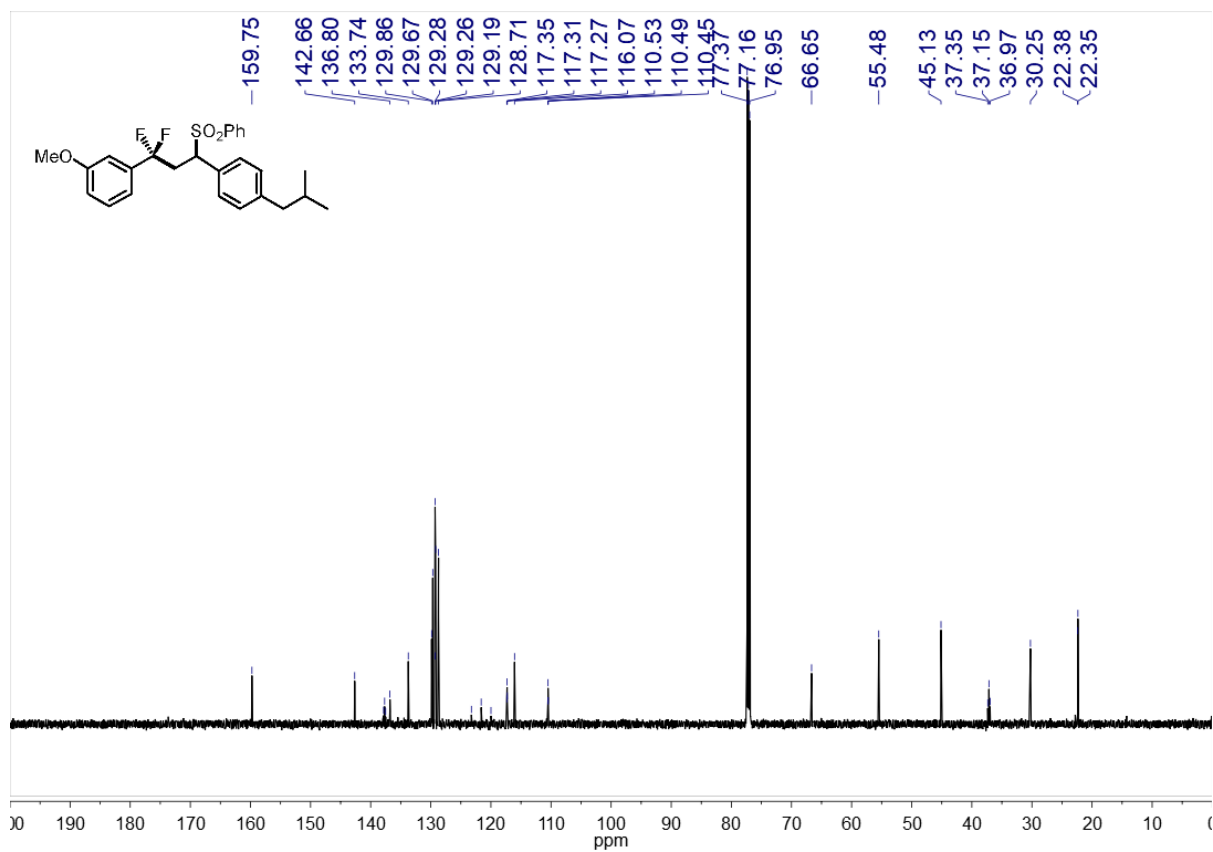

<sup>13</sup>C NMR spectrum (151 MHz, CDCl<sub>3</sub>, 23 °C) of **5v**

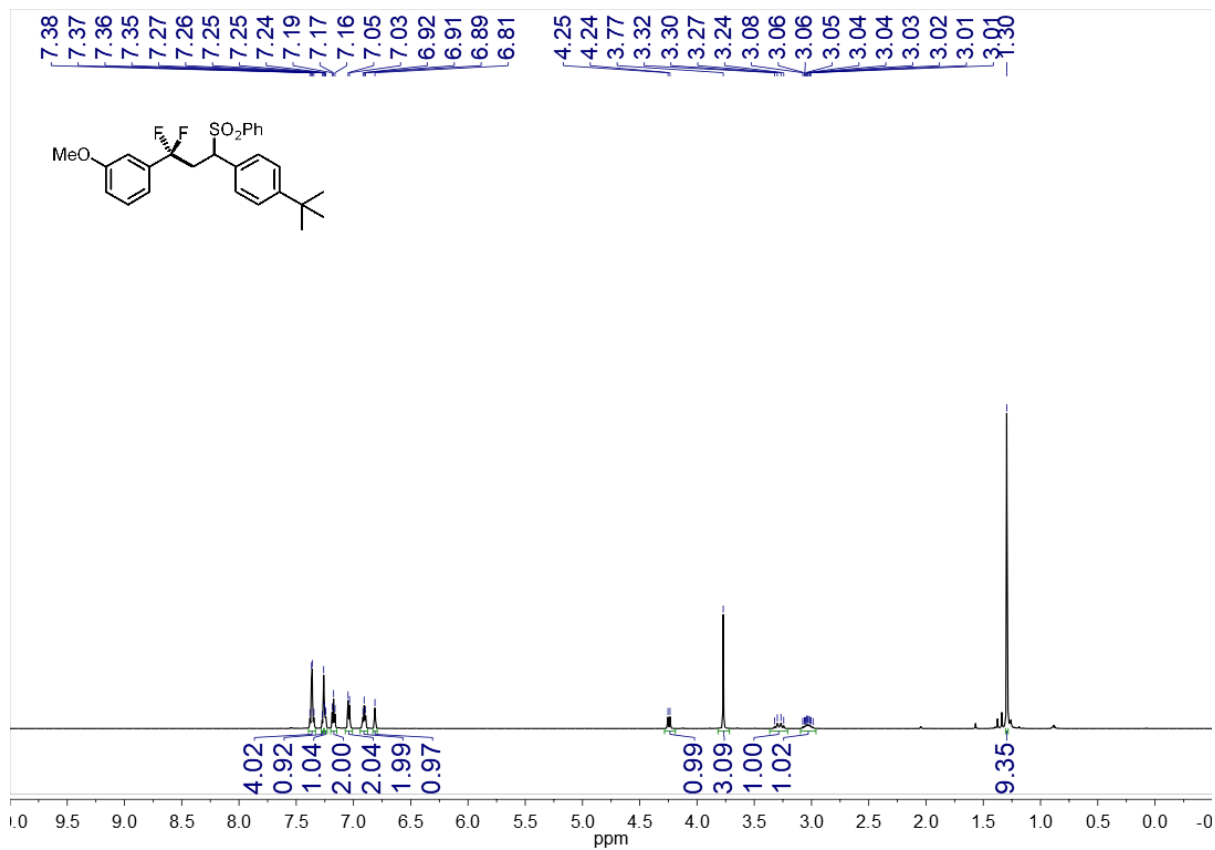

<sup>1</sup>H NMR spectrum (600 MHz, CDCl<sub>3</sub>, 23 °C) of **5w**

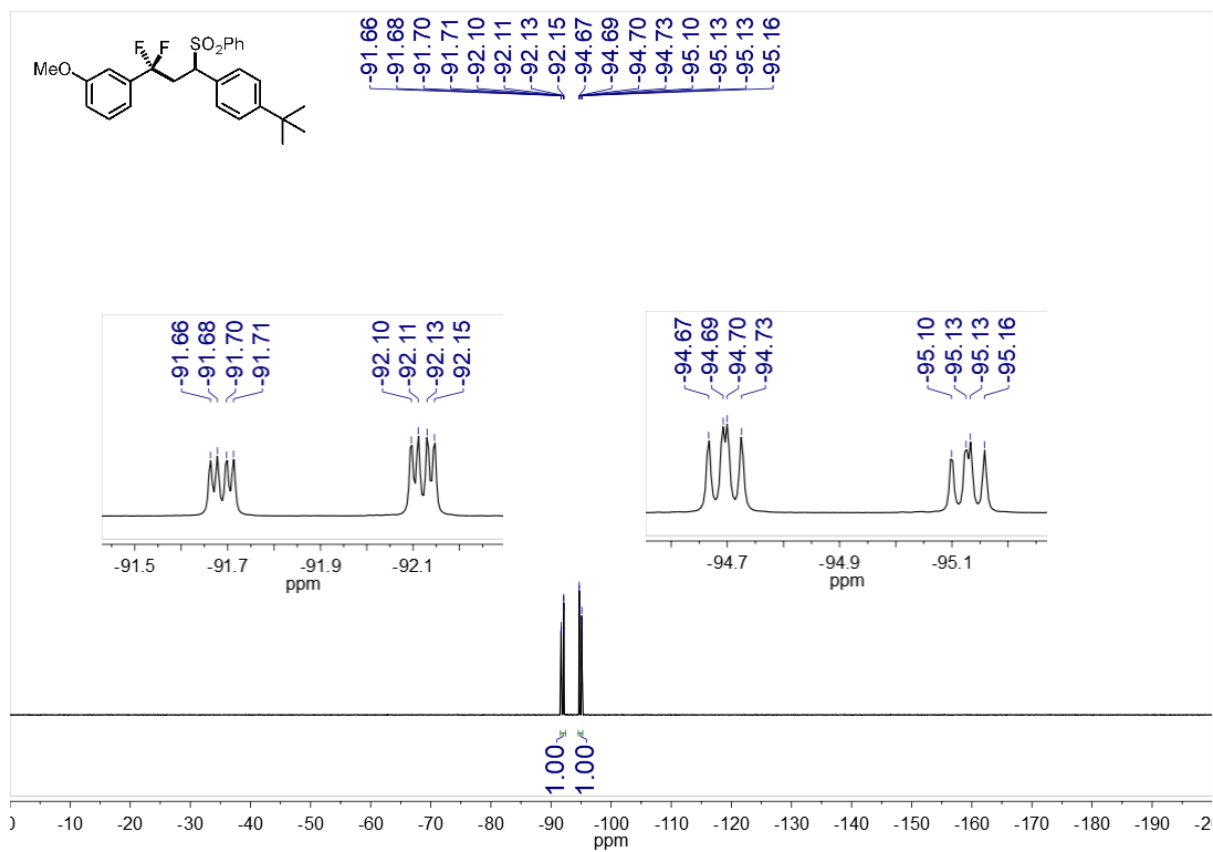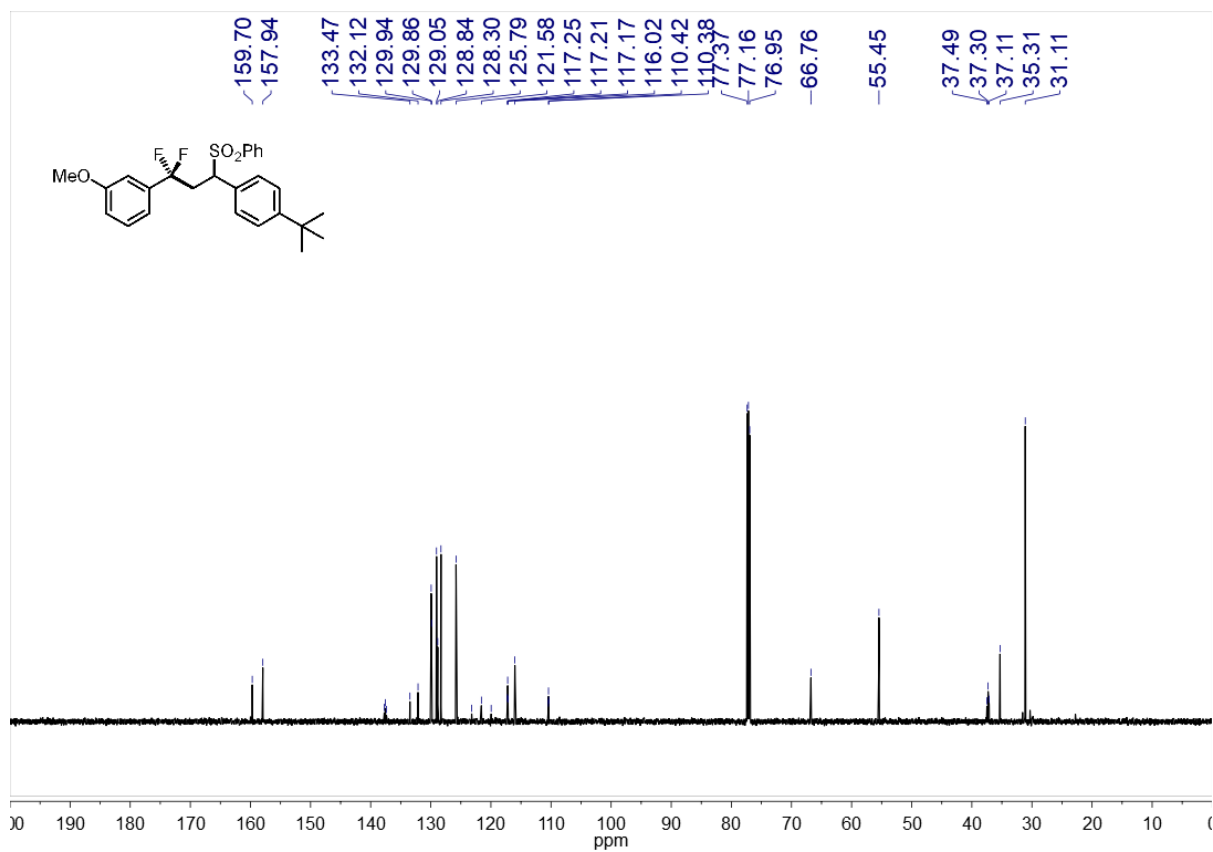

<sup>13</sup>C NMR spectrum (151 MHz, CDCl<sub>3</sub>, 23 °C) of **5w**



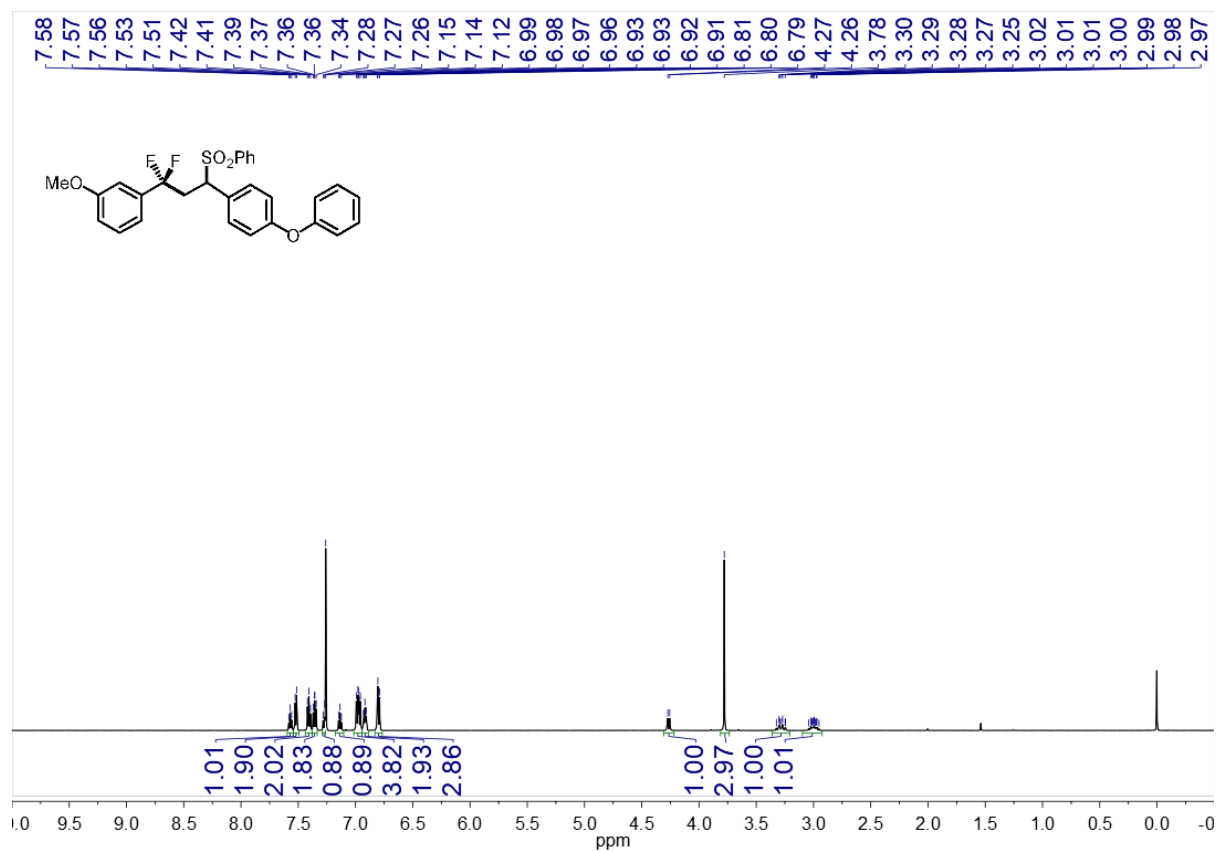

<sup>1</sup>H NMR spectrum (600 MHz, CDCl<sub>3</sub>, 23 °C) of **5x**

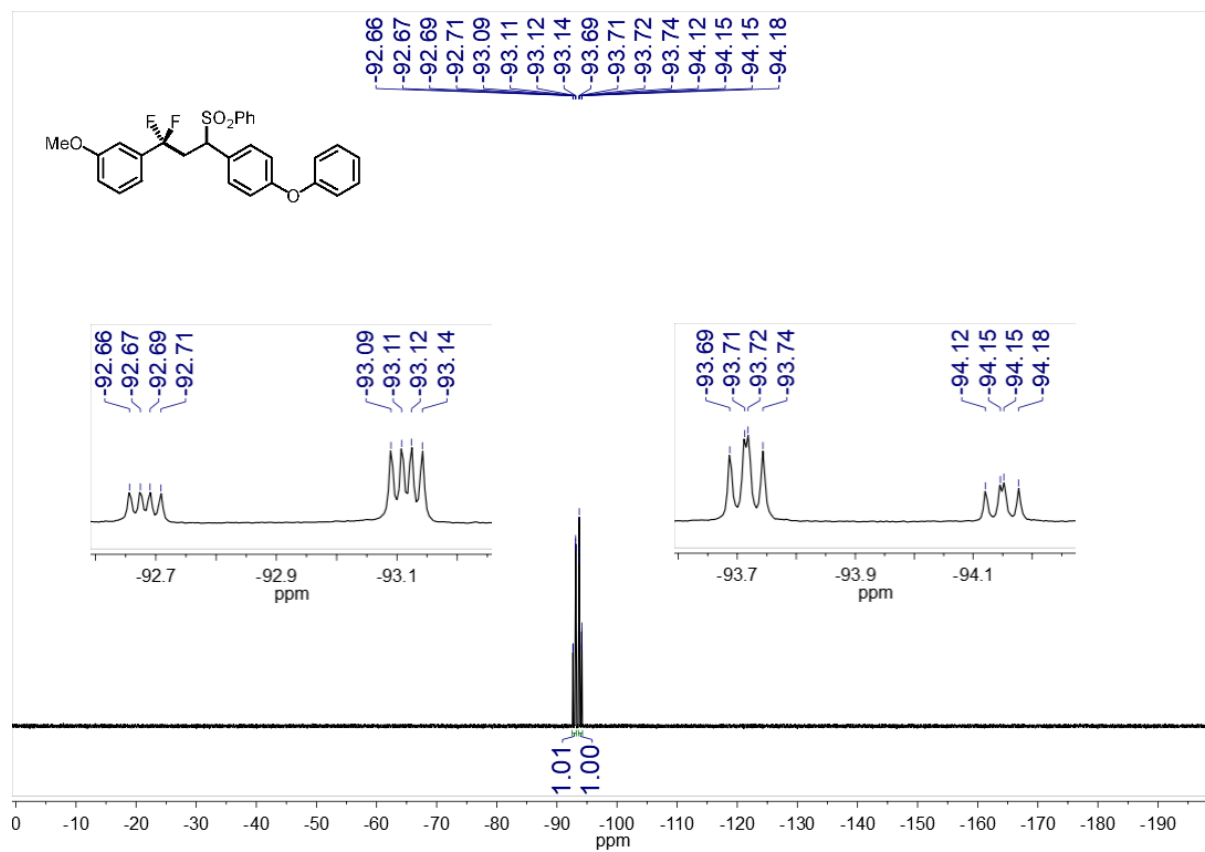

<sup>19</sup>F NMR spectrum (565 MHz, CDCl<sub>3</sub>, 23 °C) of **5x**

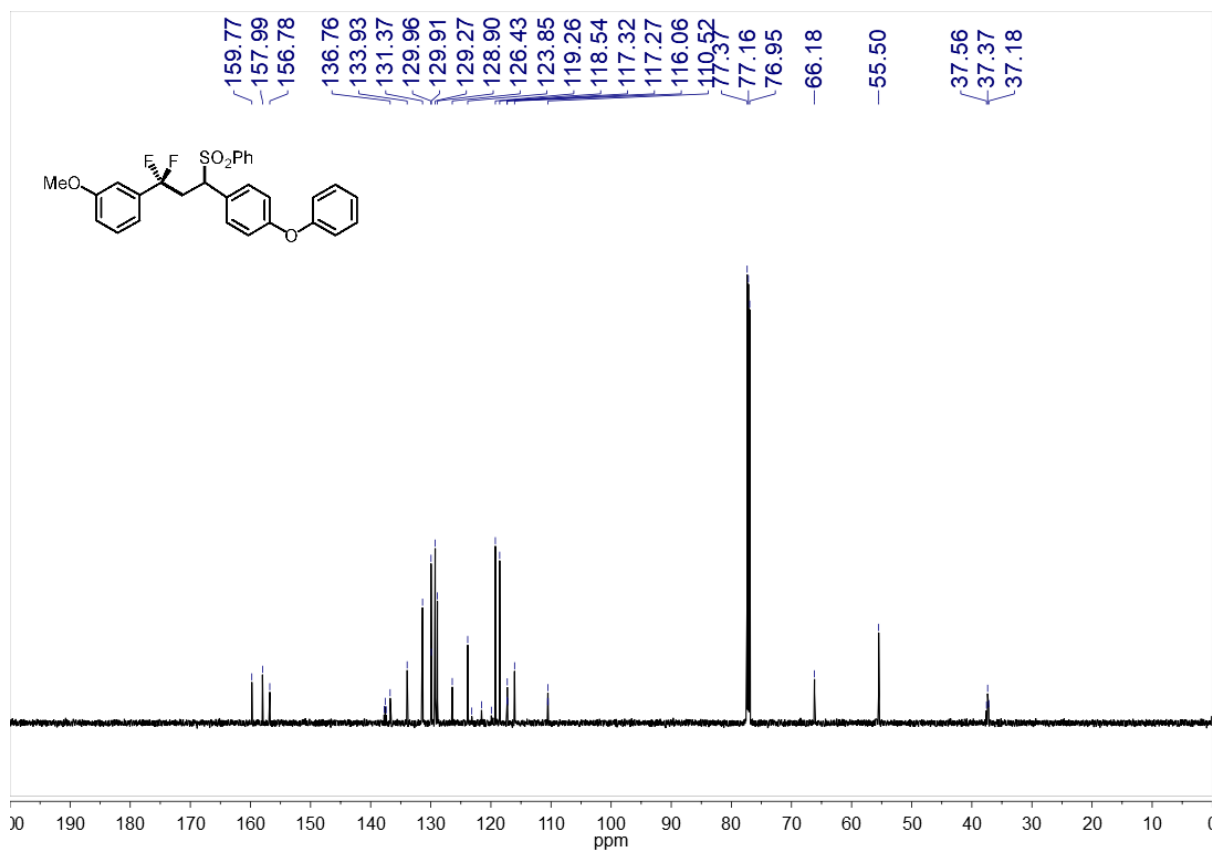

$^{13}\text{C}$  NMR spectrum (151 MHz,  $\text{CDCl}_3$ , 23 °C) of **5x**

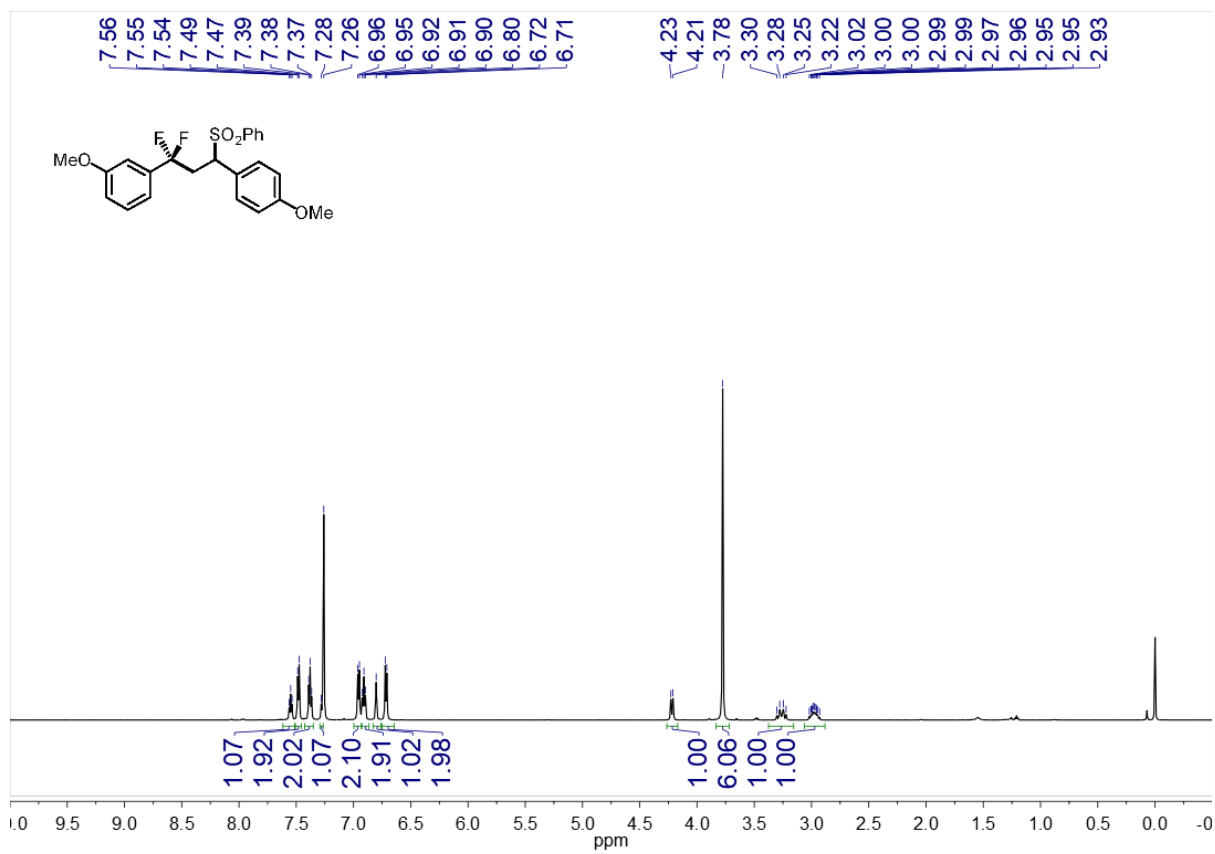

$^1\text{H}$  NMR spectrum (600 MHz,  $\text{CDCl}_3$ , 23 °C) of **5y**

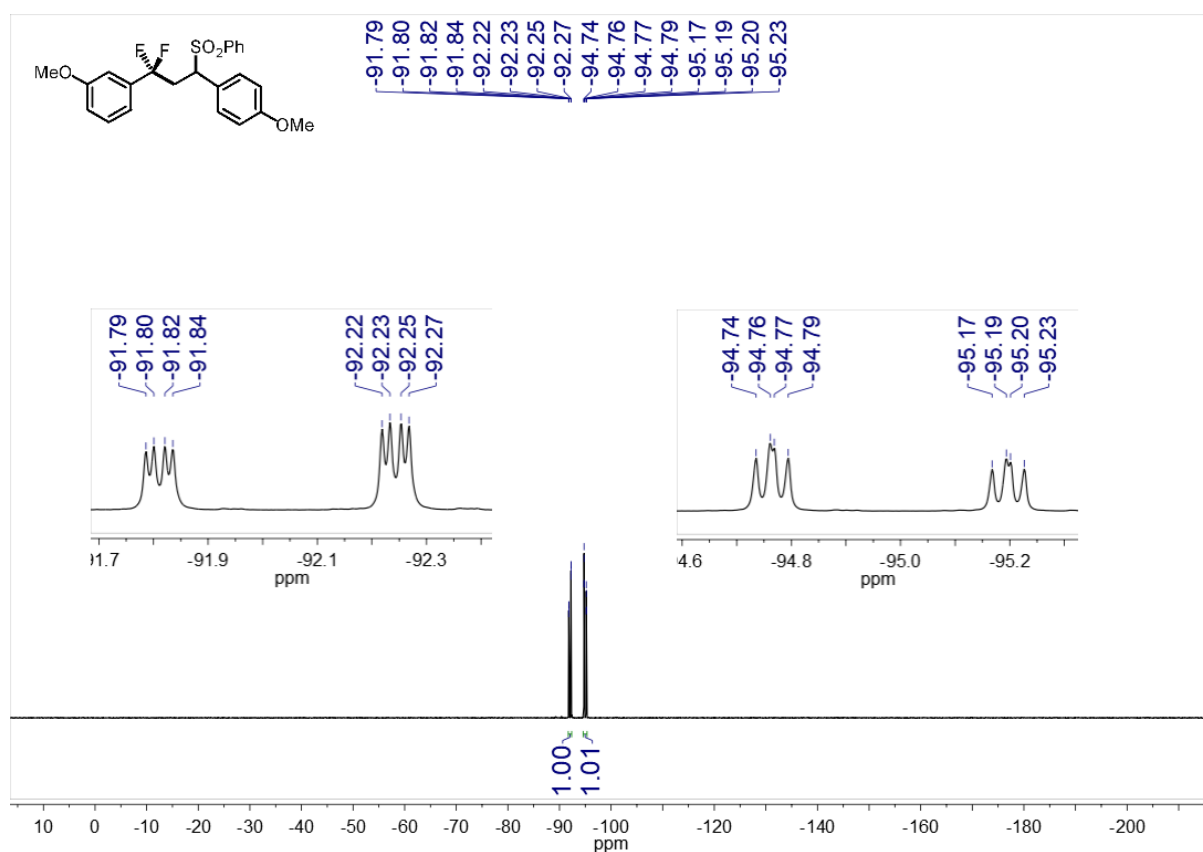

<sup>19</sup>F NMR spectrum (565 MHz, CDCl<sub>3</sub>, 23 °C) of **5y**

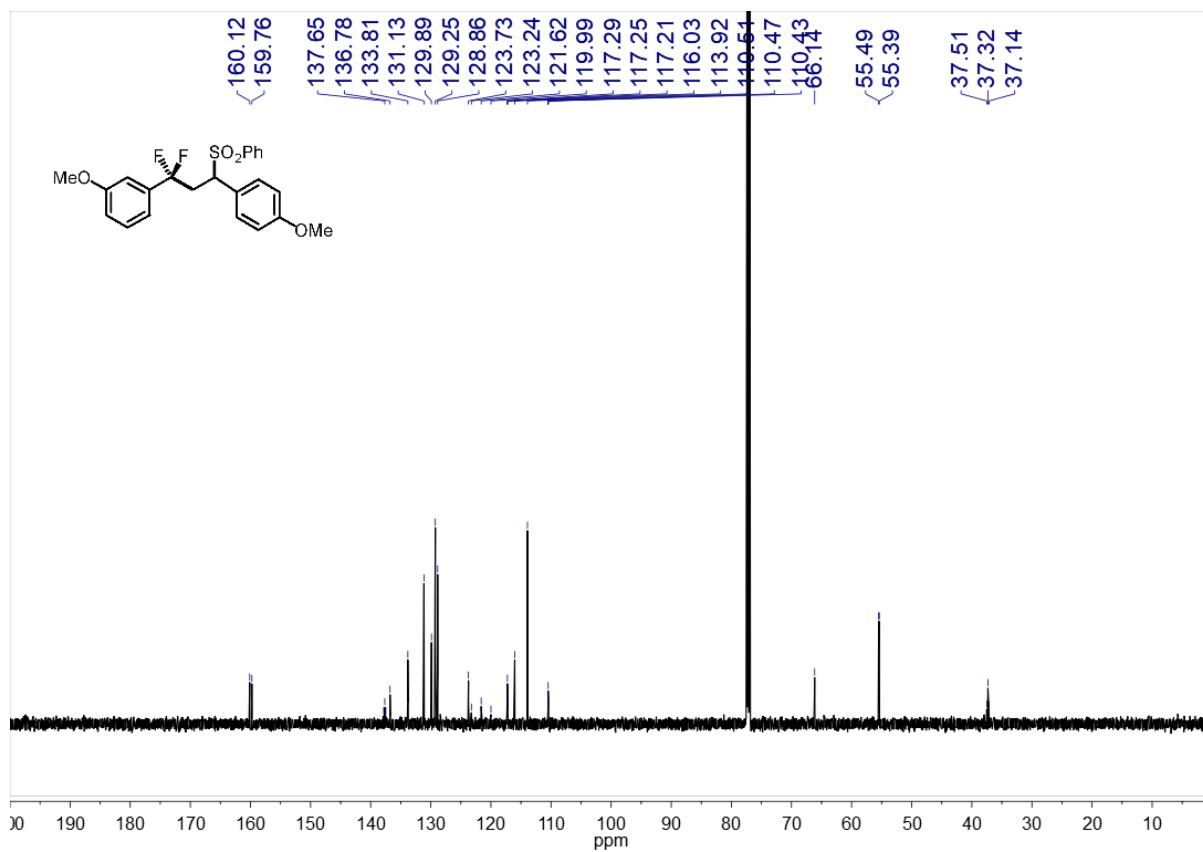

<sup>13</sup>C NMR spectrum (151 MHz, CDCl<sub>3</sub>, 23 °C) of **5y**

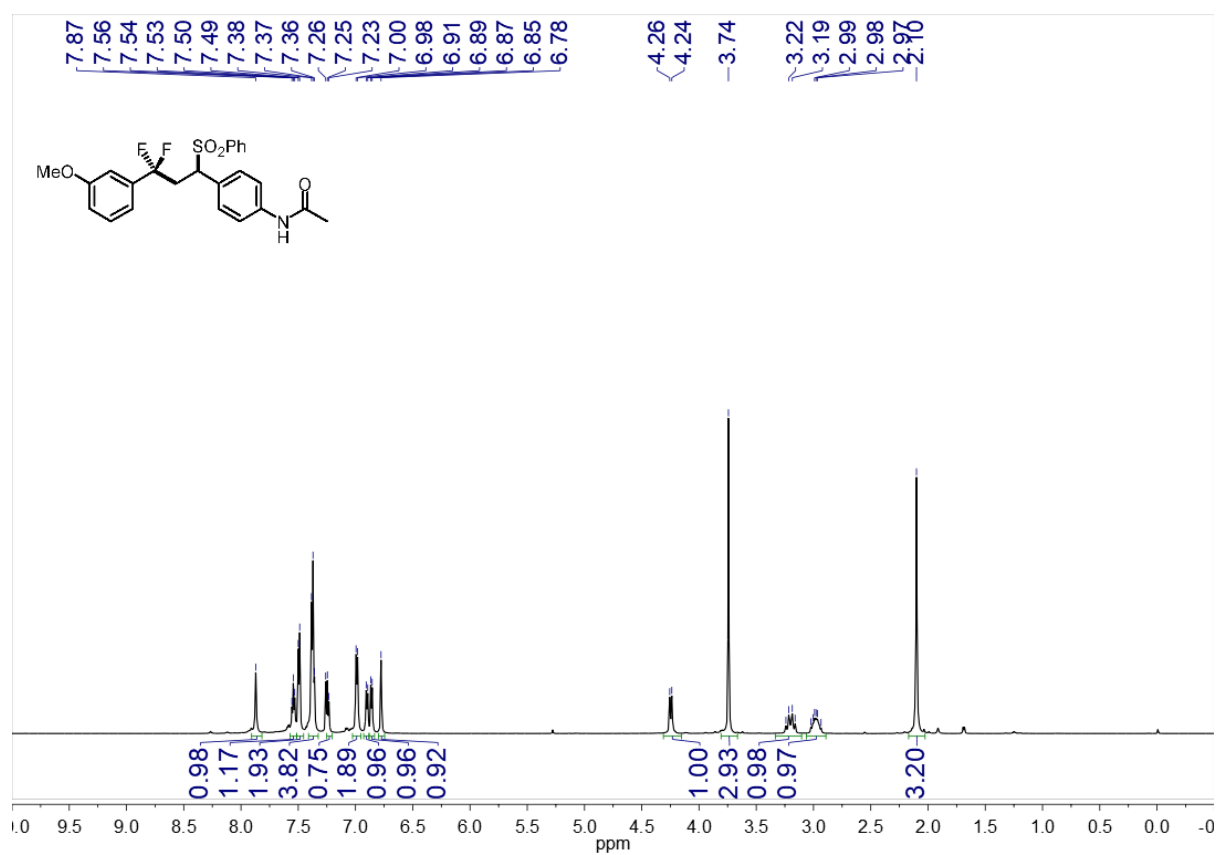

<sup>1</sup>H NMR spectrum (600 MHz, CDCl<sub>3</sub>, 23 °C) of **5z**

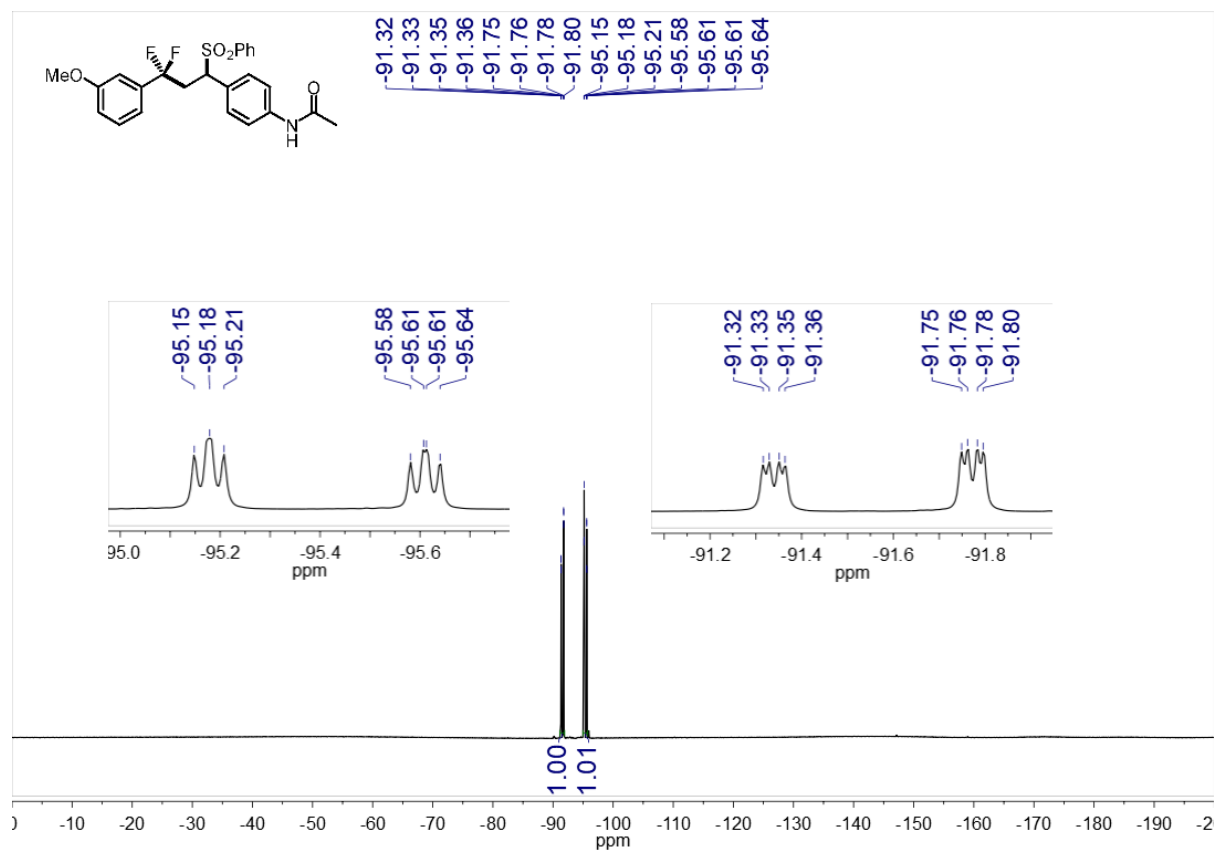

<sup>19</sup>F NMR spectrum (565 MHz, CDCl<sub>3</sub>, 23 °C) of **5z**

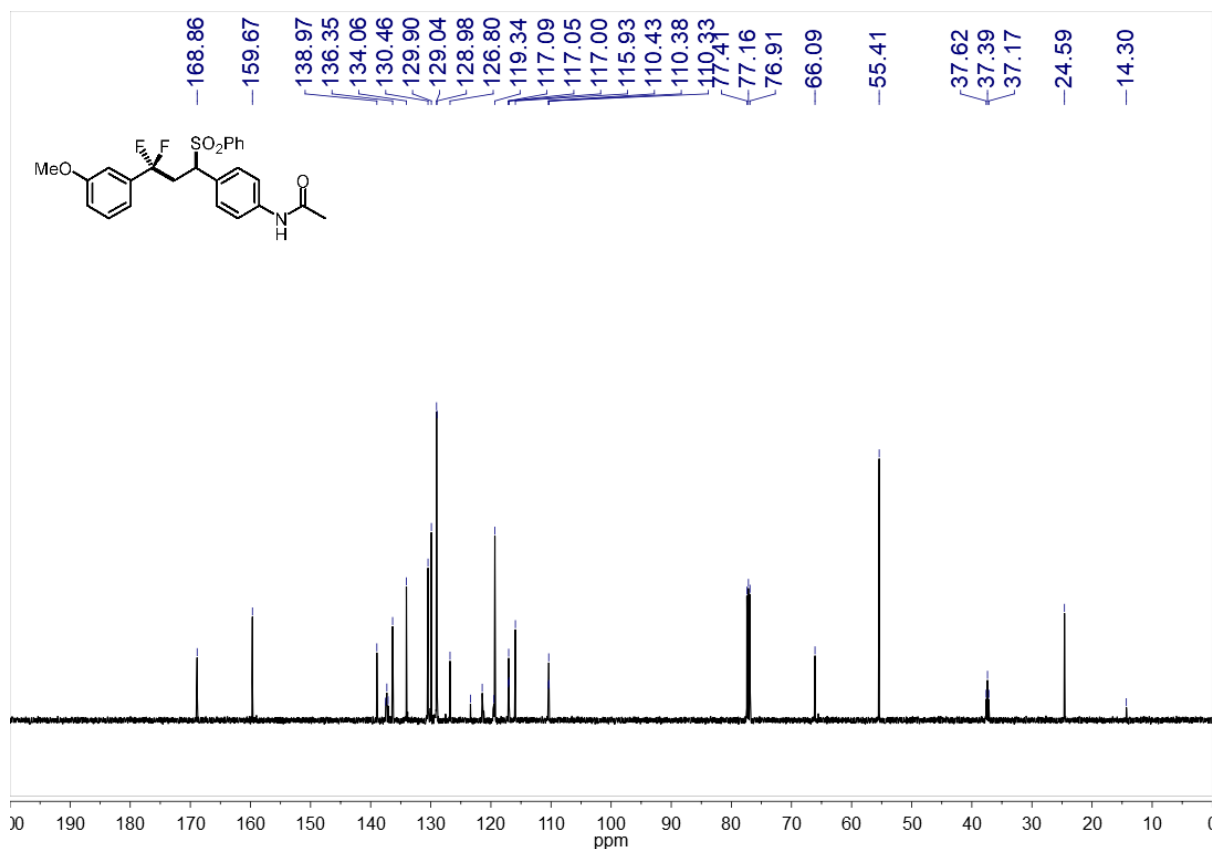

<sup>13</sup>C NMR spectrum (126 MHz, CDCl<sub>3</sub>, 23 °C) of **5z**

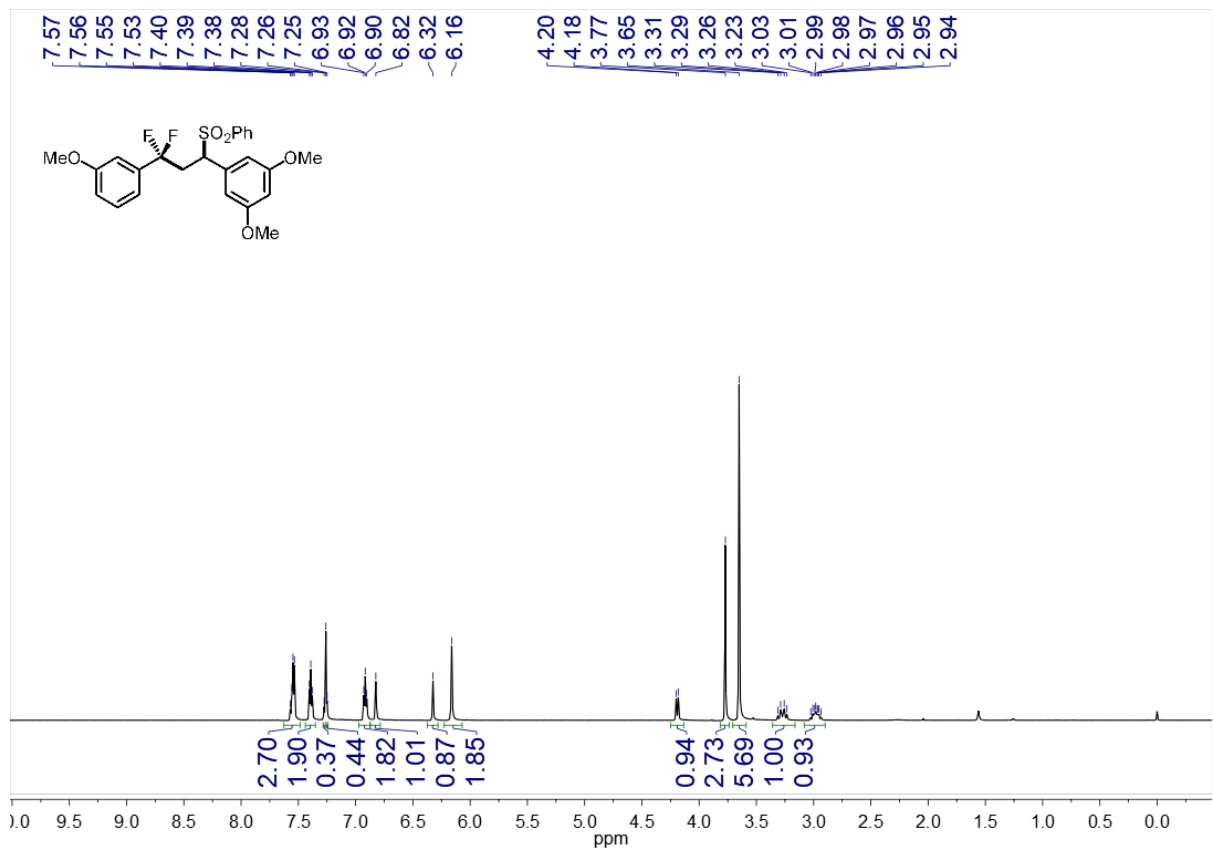

<sup>1</sup>H NMR spectrum (600 MHz, CDCl<sub>3</sub>, 23 °C) of **5aa**

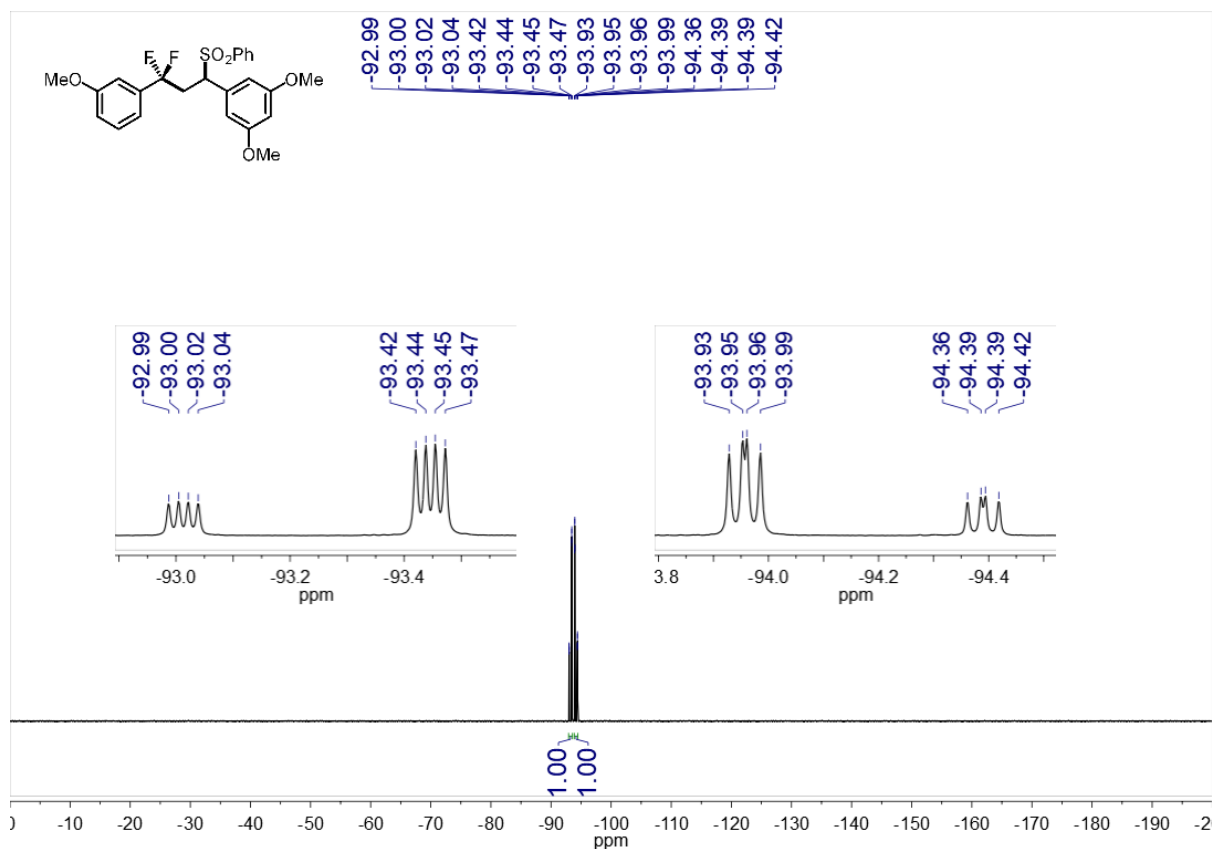

$^{19}\text{F}$  NMR spectrum (565 MHz,  $\text{CDCl}_3$ , 23 °C) of **5aa**

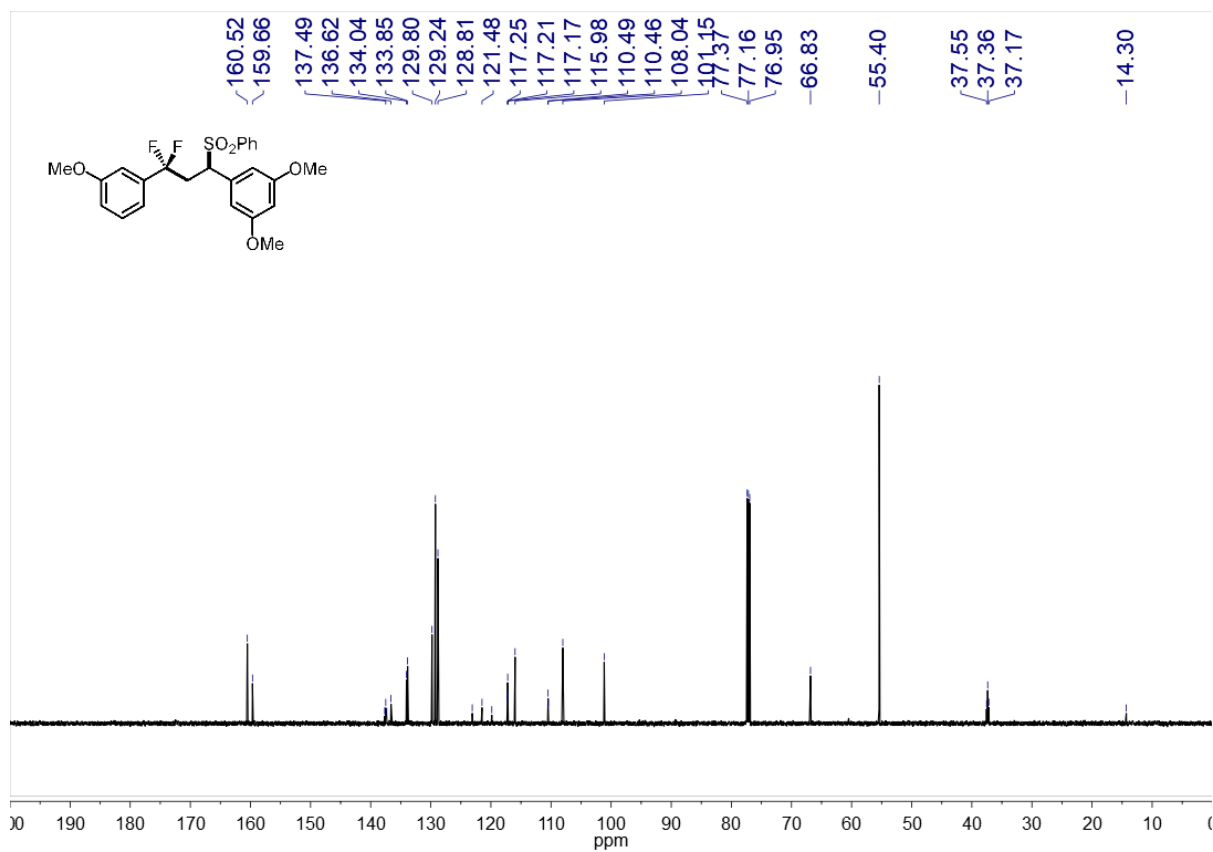

$^{13}\text{C}$  NMR spectrum (151 MHz,  $\text{CDCl}_3$ , 23 °C) of **5aa**

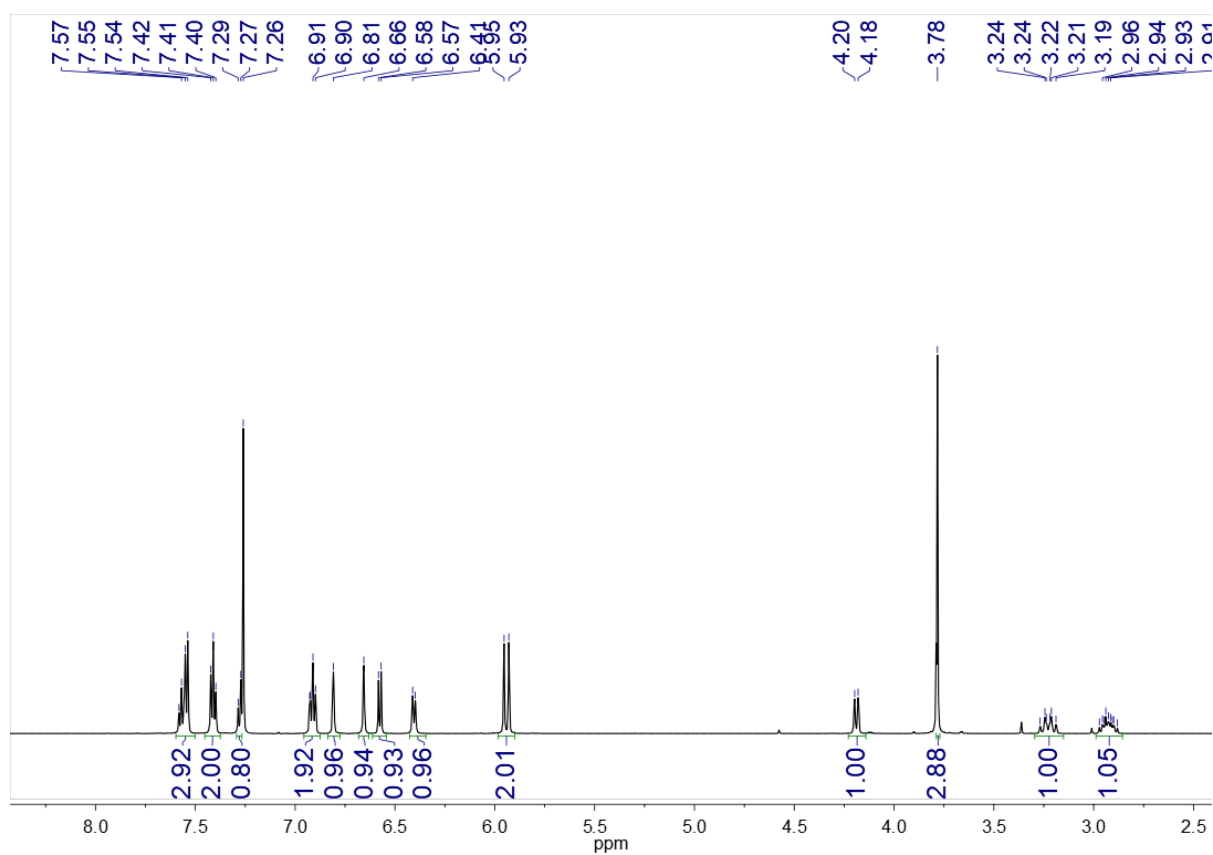

<sup>1</sup>H NMR spectrum (600 MHz, CDCl<sub>3</sub>, 23 °C) of **5ab**

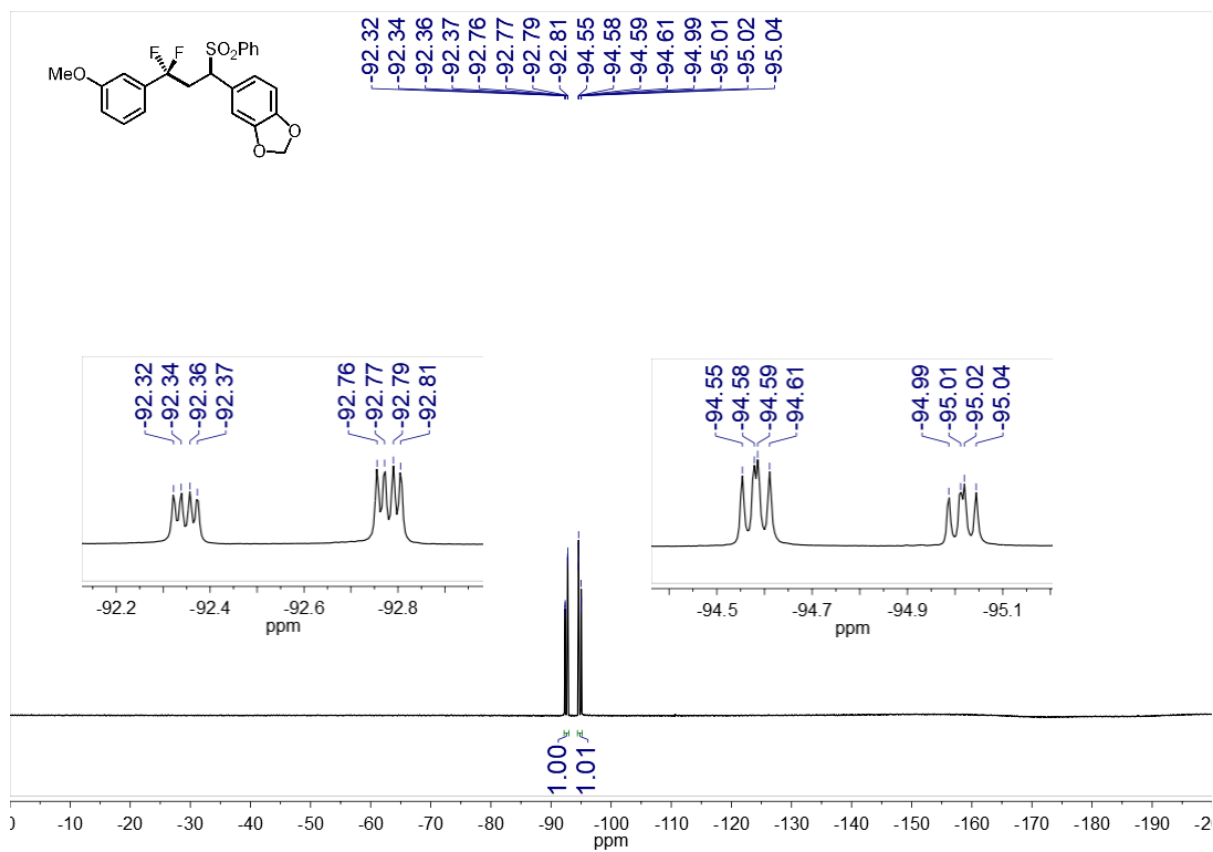

<sup>19</sup>F NMR spectrum (565 MHz, CDCl<sub>3</sub>, 23 °C) of **5ab**

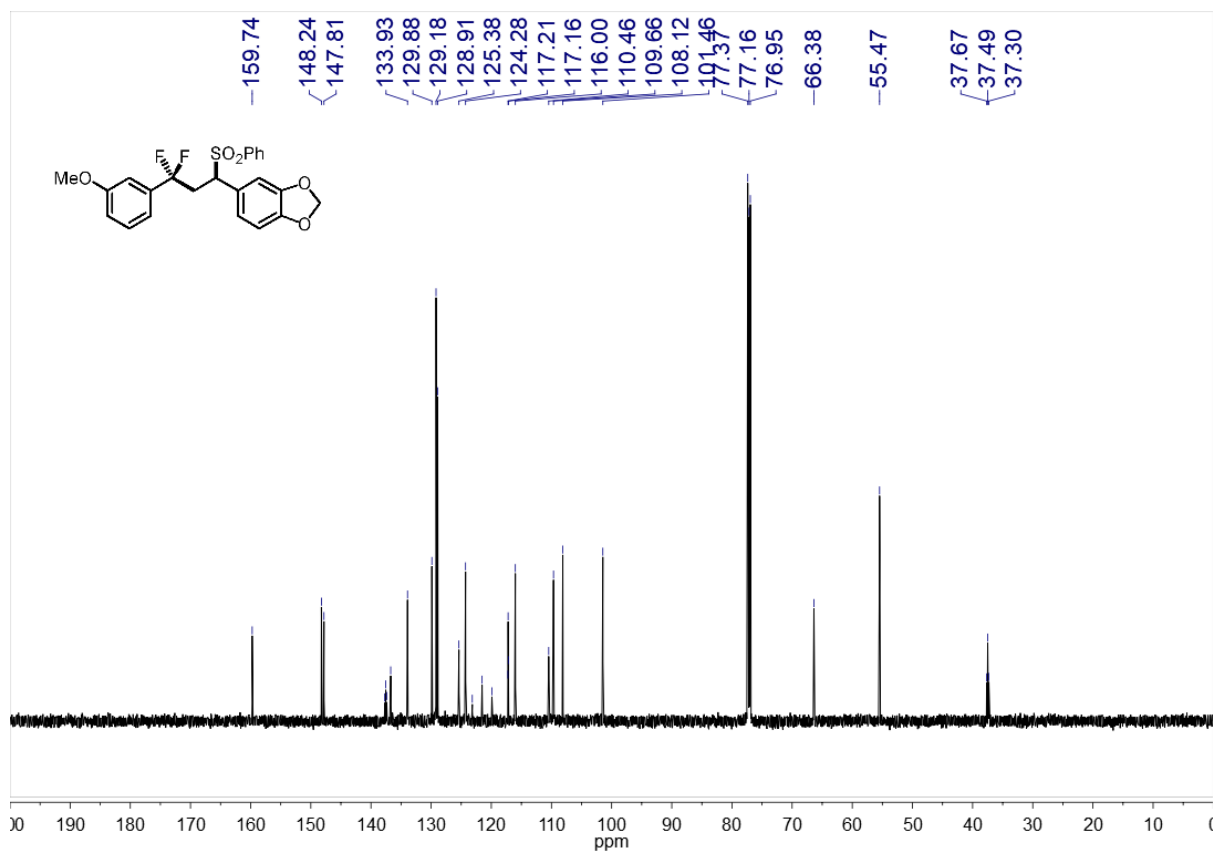

<sup>13</sup>C NMR spectrum (151 MHz, CDCl<sub>3</sub>, 23 °C) of **5ab**

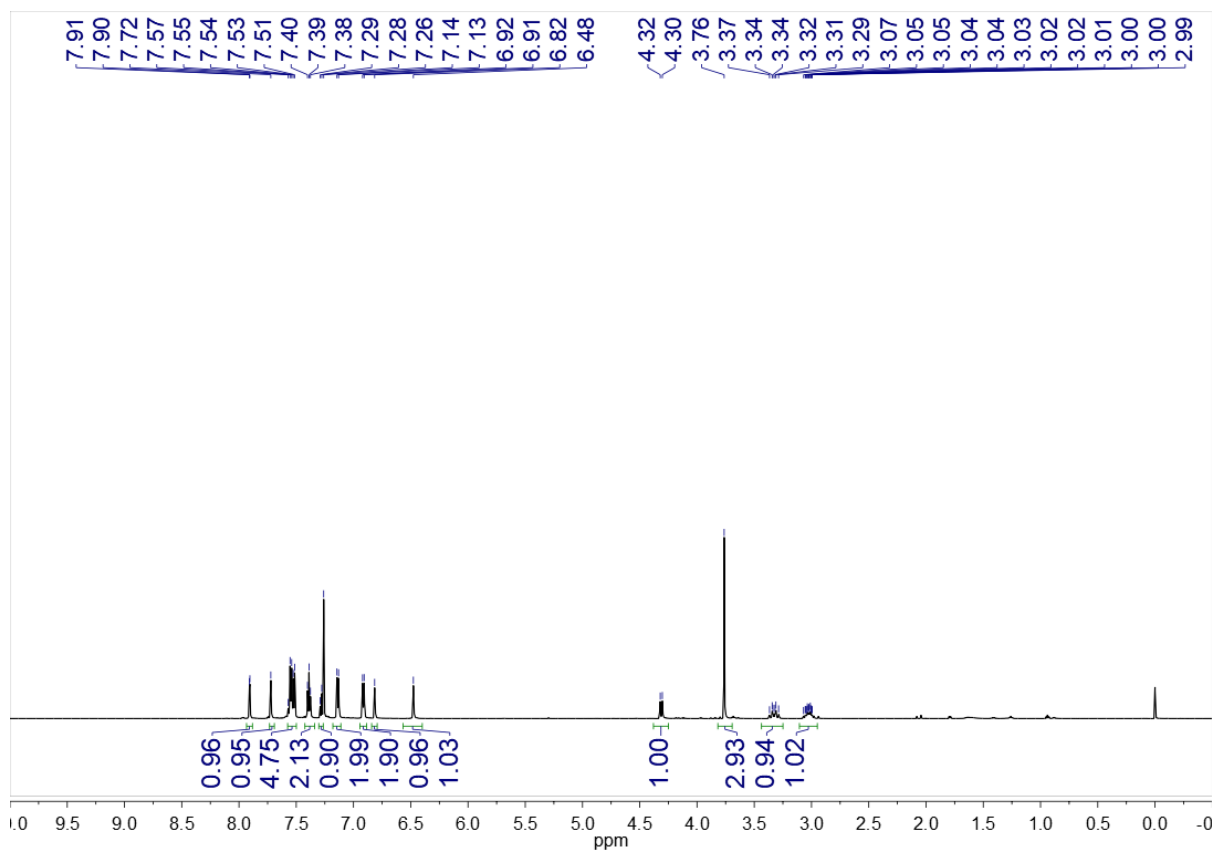

<sup>1</sup>H NMR spectrum (600 MHz, CDCl<sub>3</sub>, 23 °C) of **5ac**



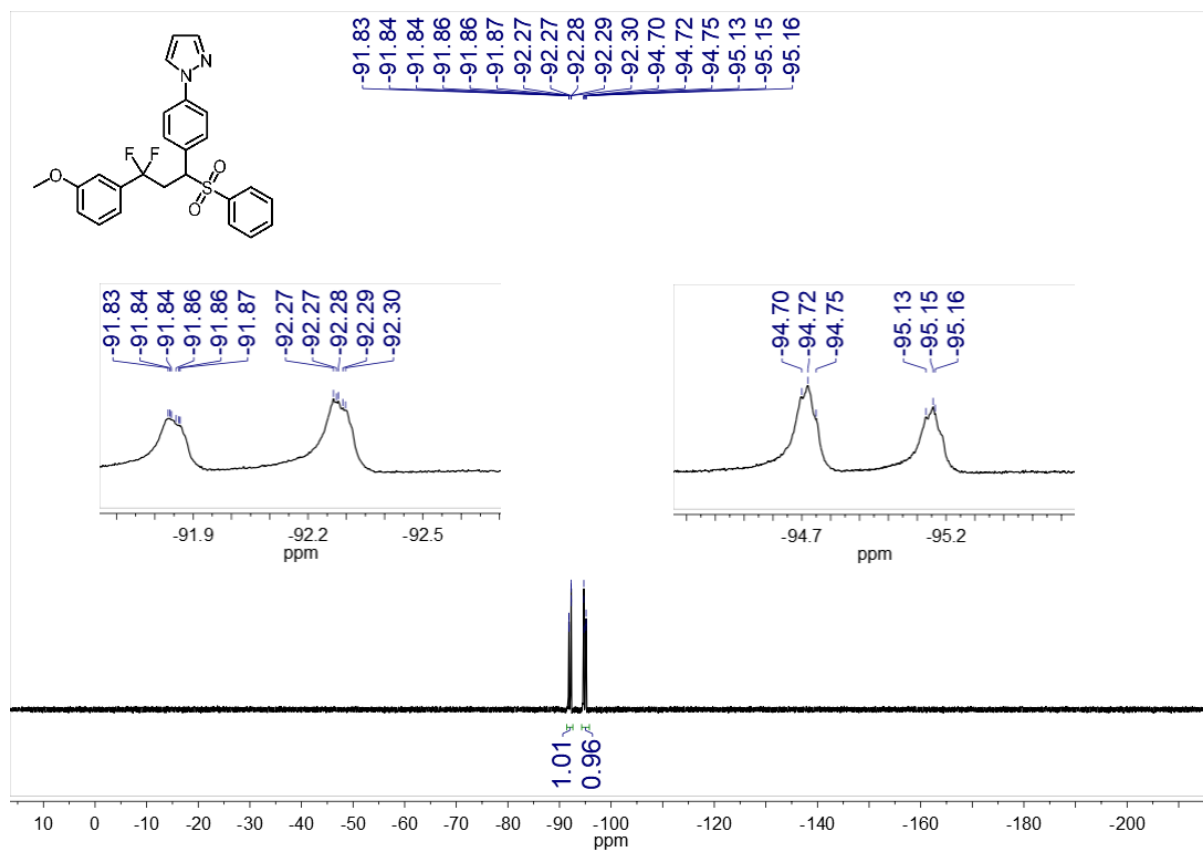

$^{19}\text{F}$  NMR spectrum (565 MHz,  $\text{CDCl}_3$ , 23  $^\circ\text{C}$ ) of **5ac**

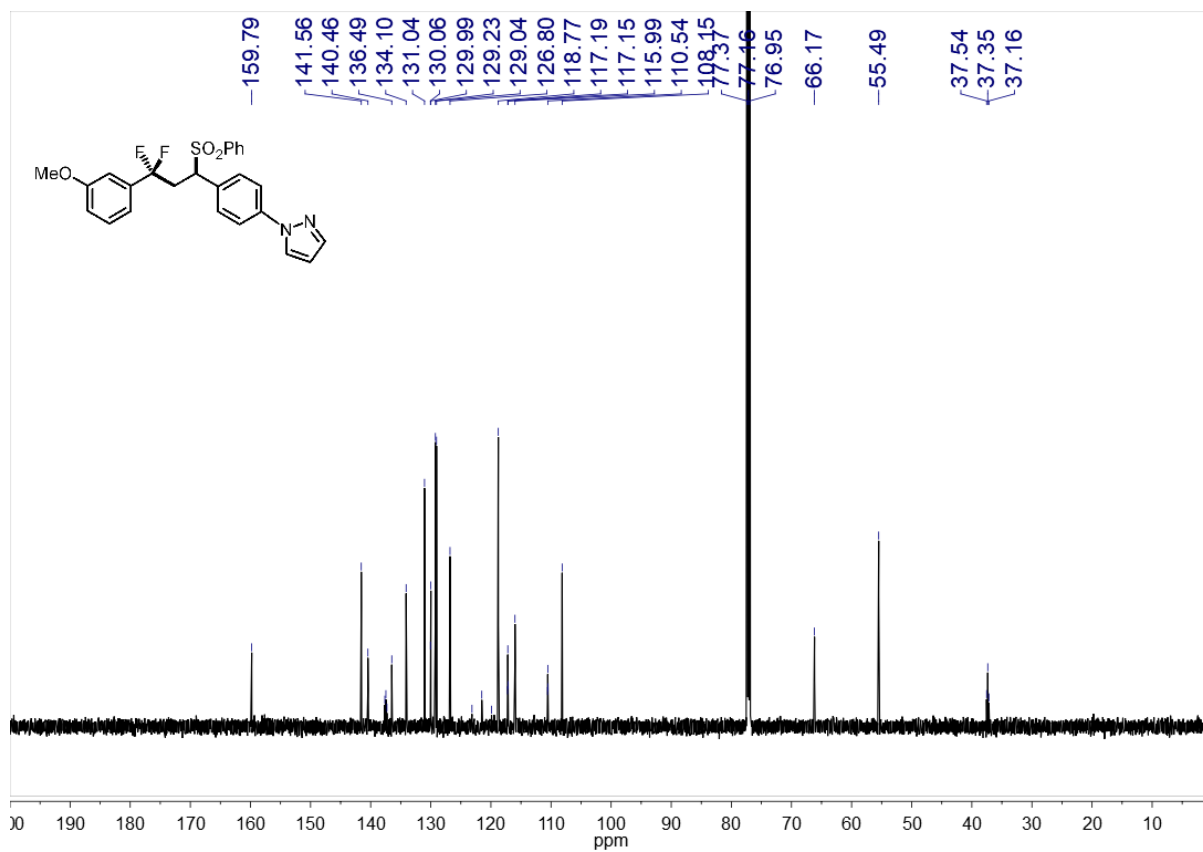

$^{13}\text{C}$  NMR spectrum (151 MHz,  $\text{CDCl}_3$ , 23  $^\circ\text{C}$ ) of **5ac**

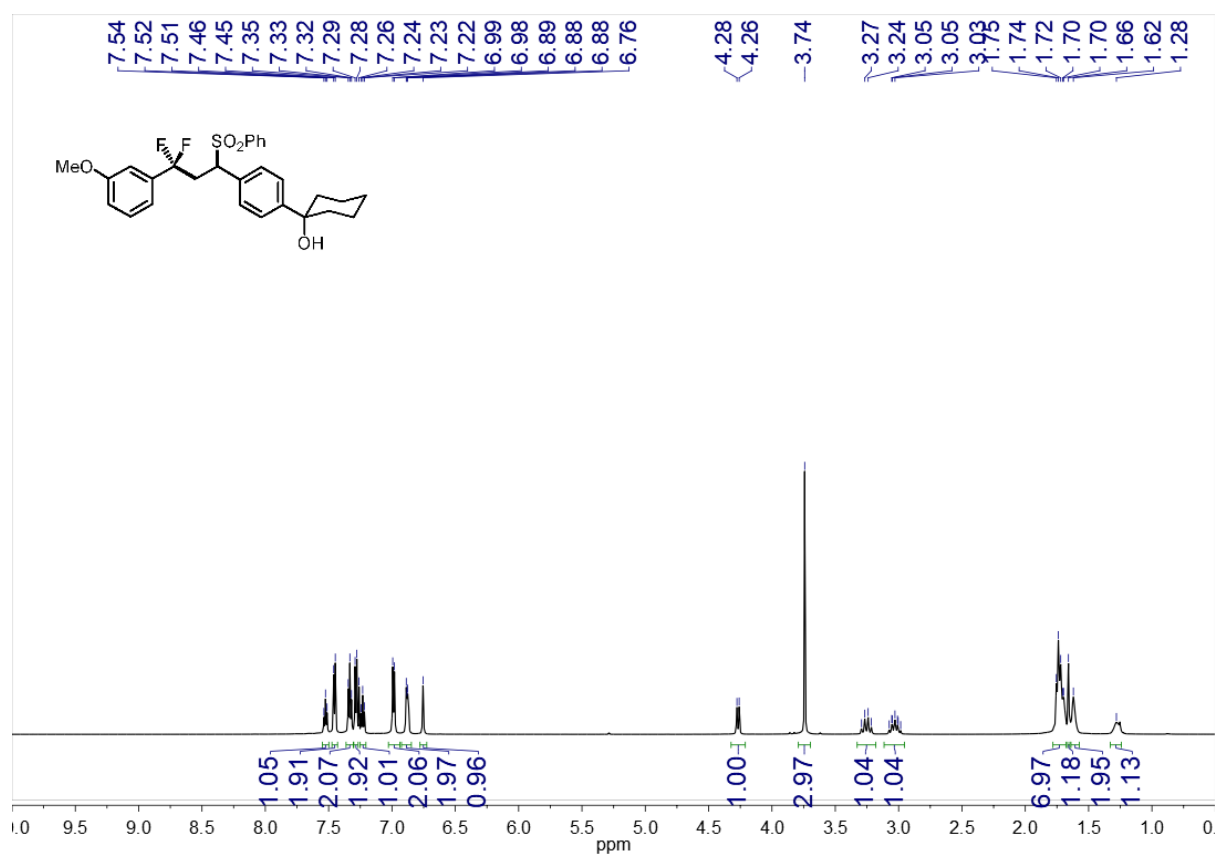

**<sup>1</sup>H NMR spectrum (600 MHz, CDCl<sub>3</sub>, 23 °C) of **5ad****

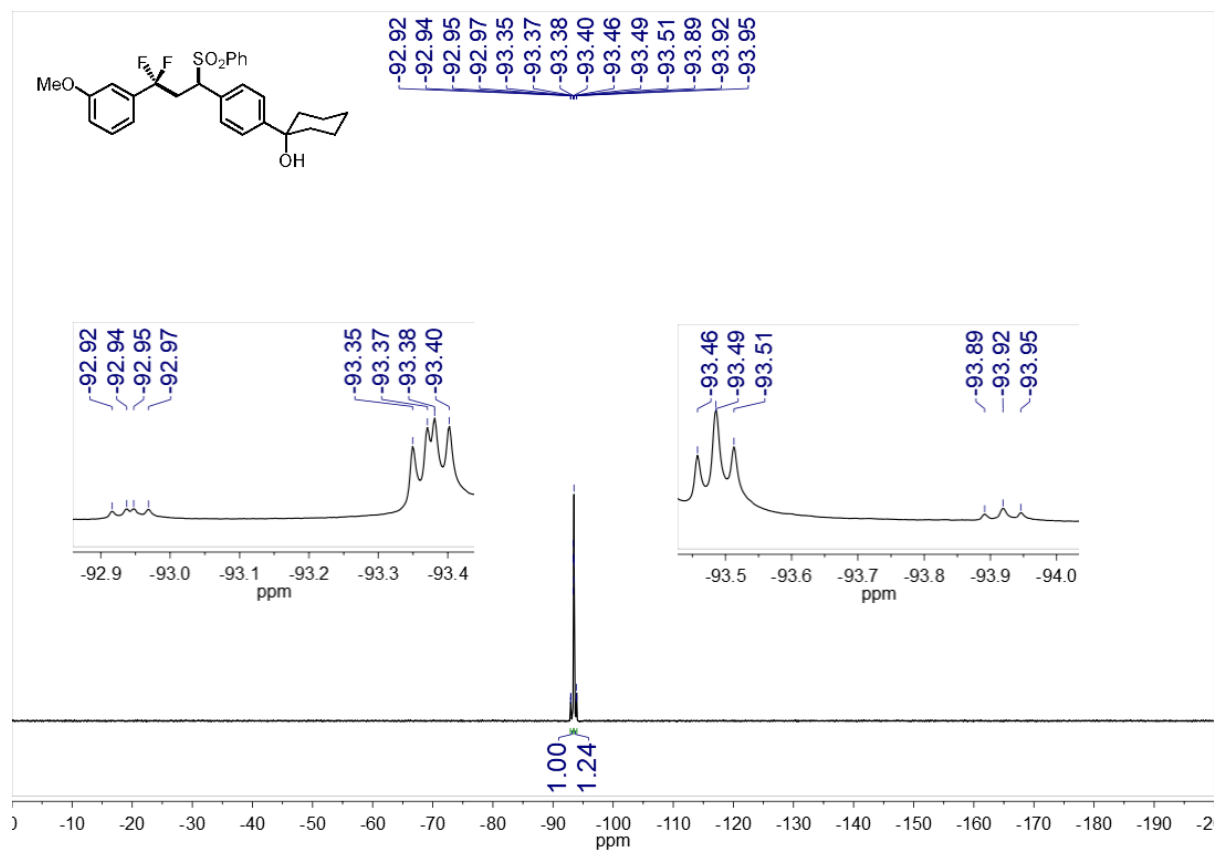

**<sup>19</sup>F NMR spectrum (565 MHz, CDCl<sub>3</sub>, 23 °C) of **5ad****

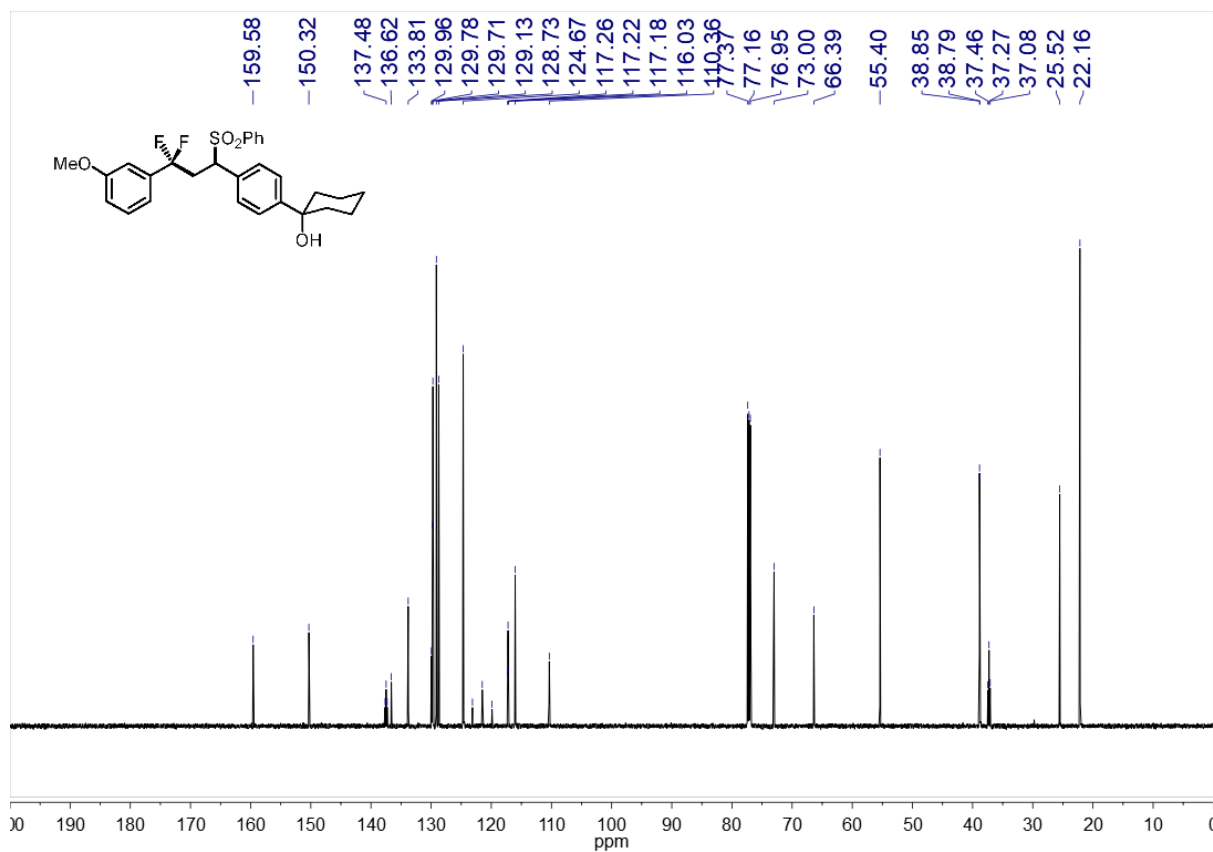

<sup>13</sup>C NMR spectrum (151 MHz, CDCl<sub>3</sub>, 23 °C) of **5ad**

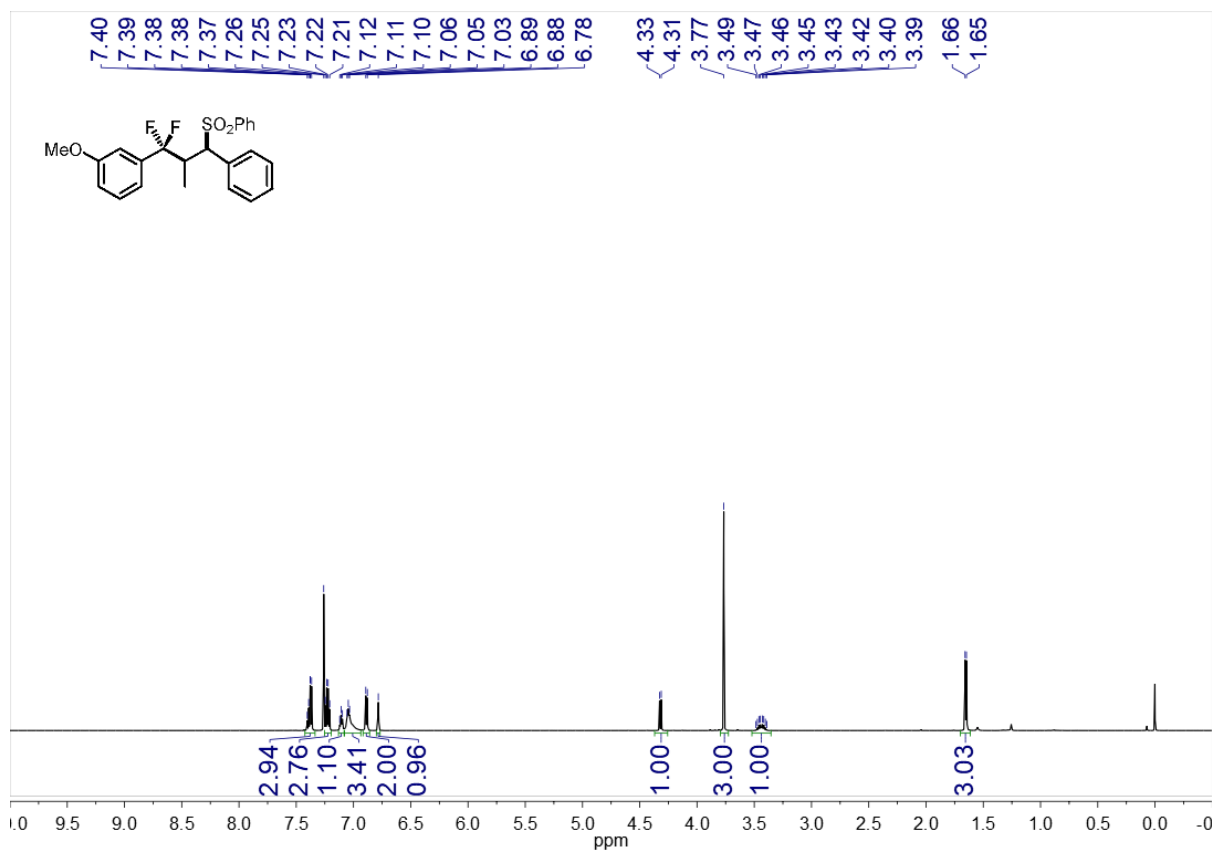

<sup>1</sup>H NMR spectrum (600 MHz, CDCl<sub>3</sub>, 23 °C) of **5ae**

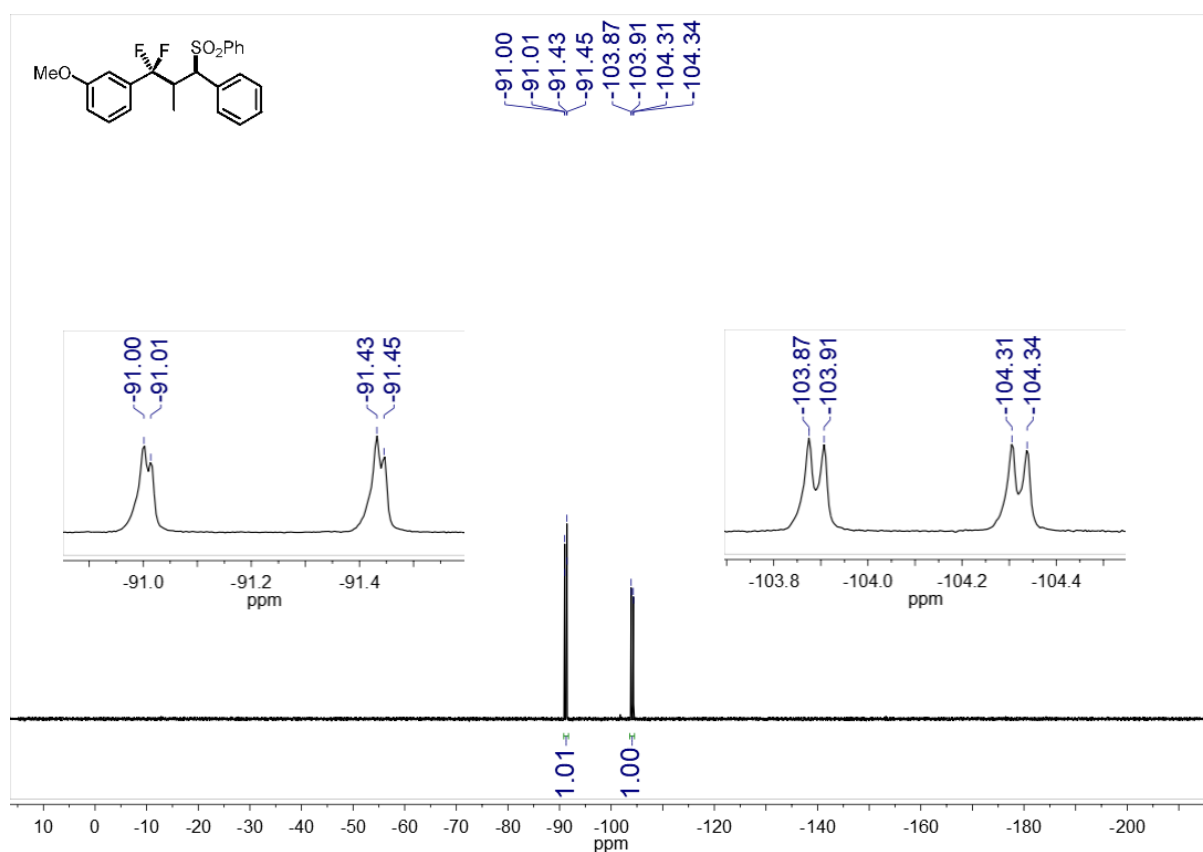

$^{19}\text{F}$  NMR spectrum (565 MHz,  $\text{CDCl}_3$ , 23  $^\circ\text{C}$ ) of **5ae**

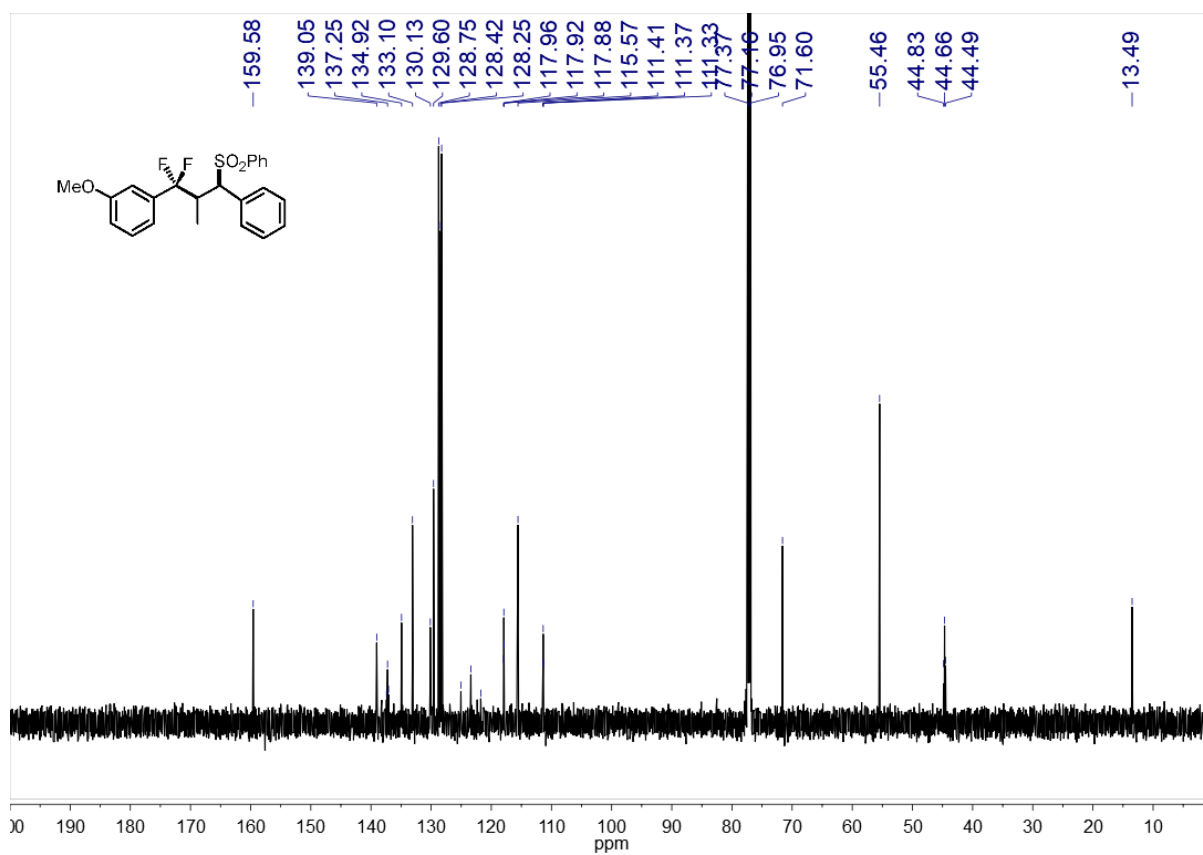

$^{13}\text{C}$  NMR spectrum (151 MHz,  $\text{CDCl}_3$ , 23  $^\circ\text{C}$ ) of **5ae**

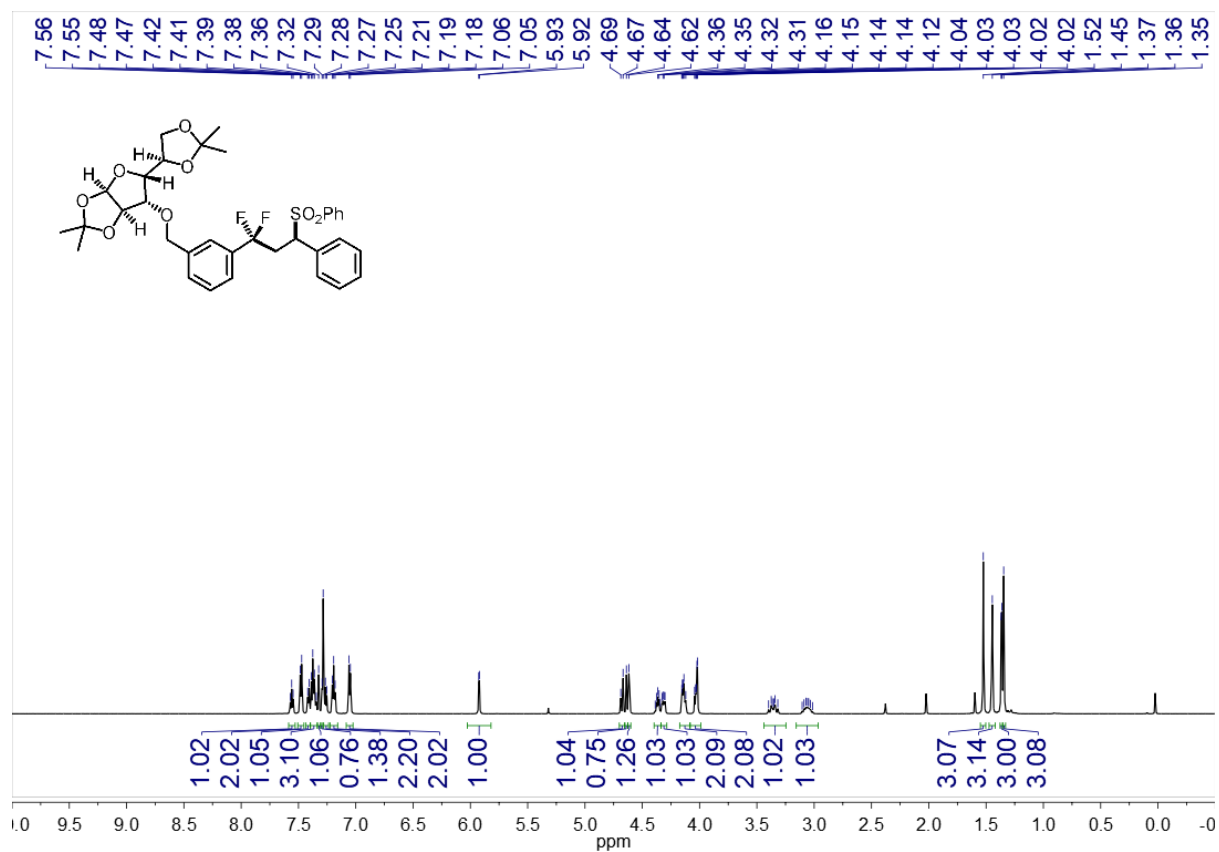

**<sup>1</sup>H NMR spectrum (600 MHz, CDCl<sub>3</sub>, 23 °C) of **5af****

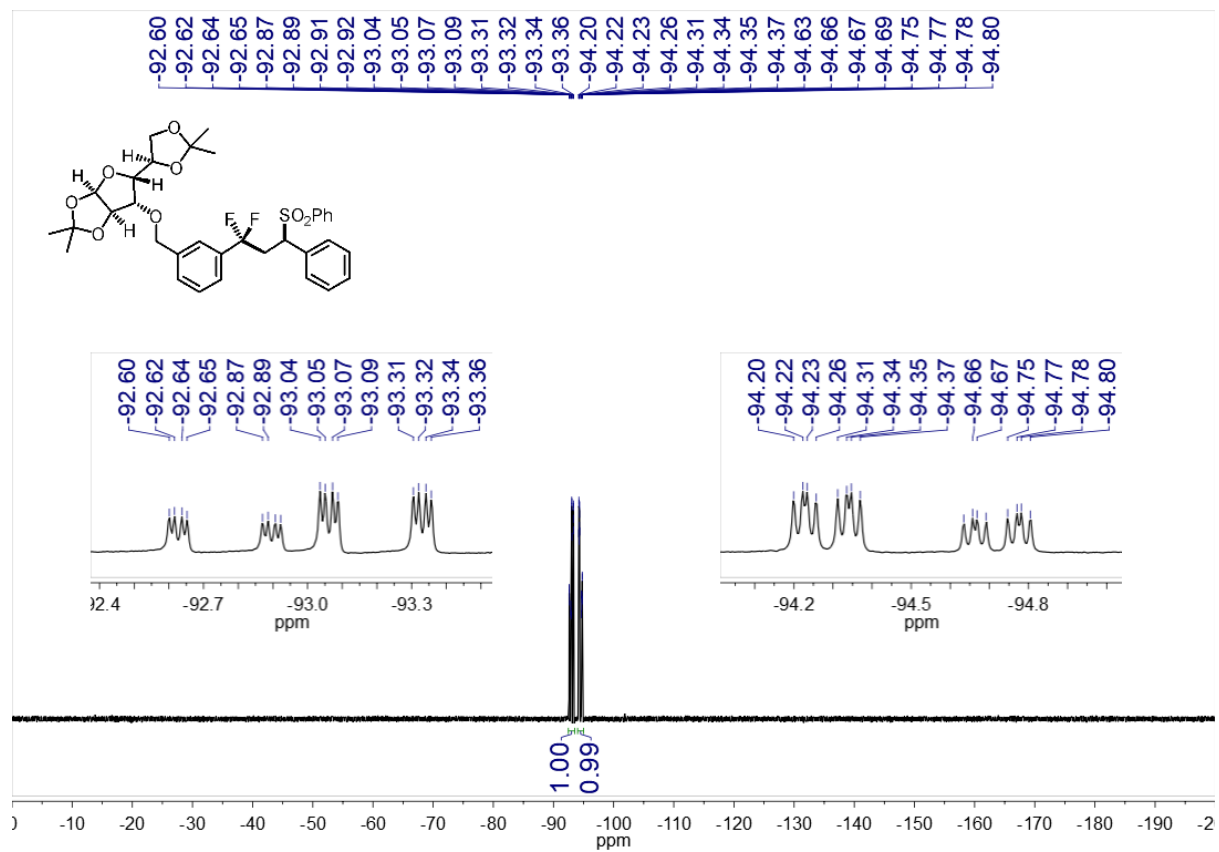

**<sup>19</sup>F NMR spectrum (565 MHz, CDCl<sub>3</sub>, 23 °C) of **5af****

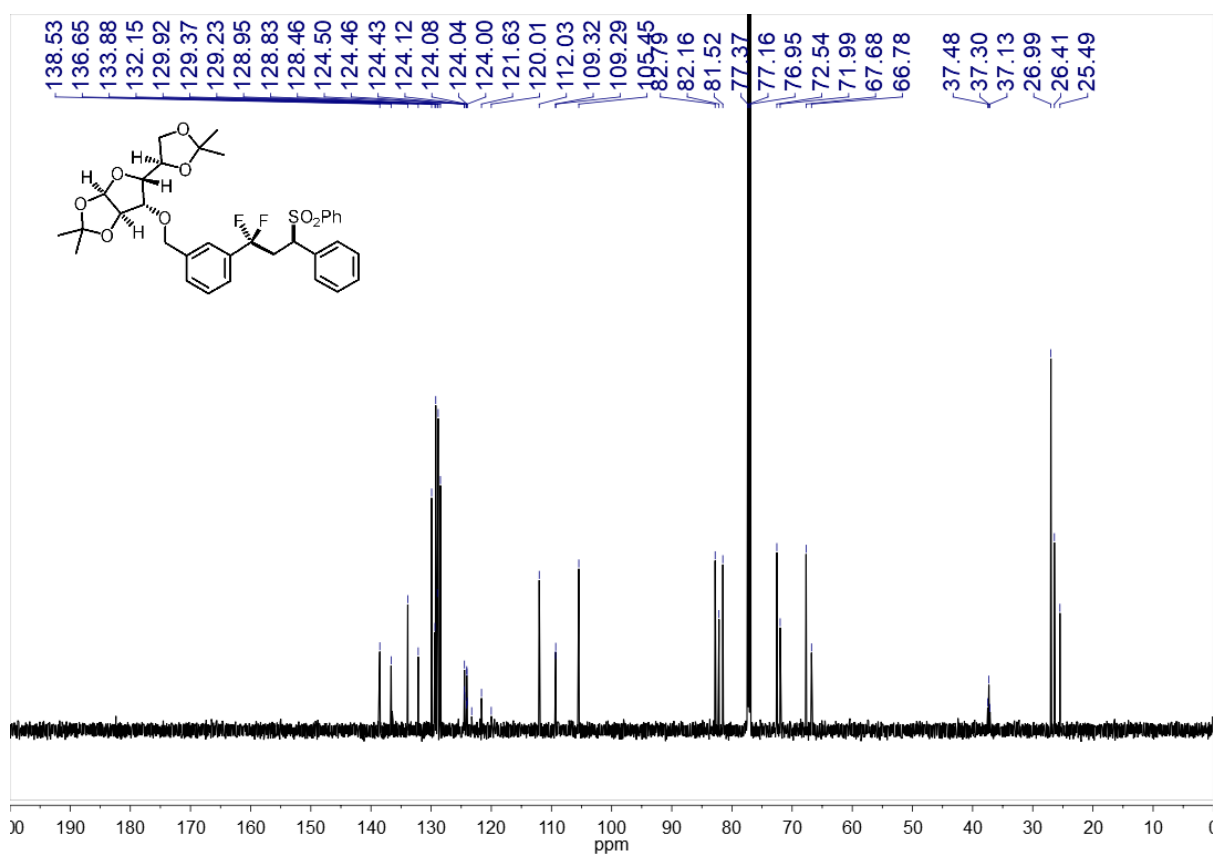

<sup>13</sup>C NMR spectrum (151 MHz, CDCl<sub>3</sub>, 23 °C) of **5af**

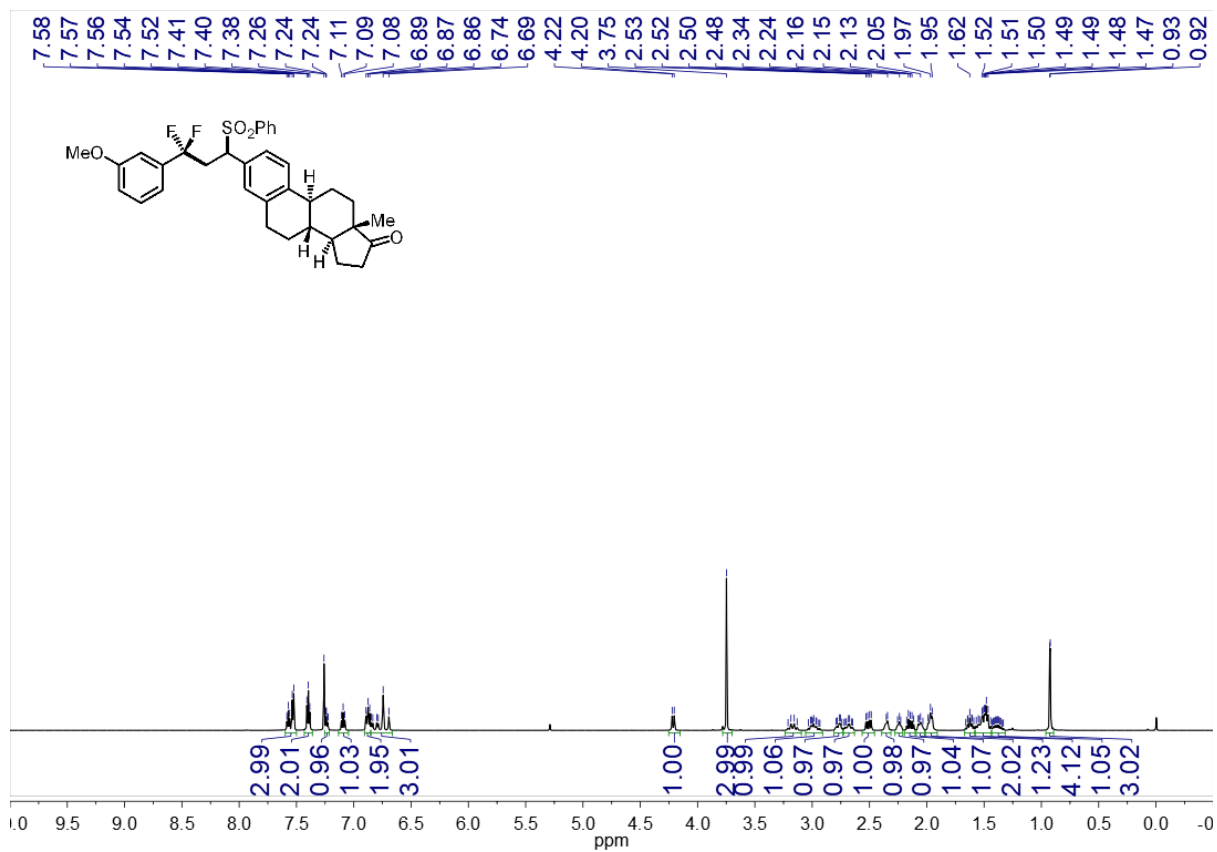

<sup>1</sup>H NMR spectrum (600 MHz, CDCl<sub>3</sub>, 23 °C) of **5ag**

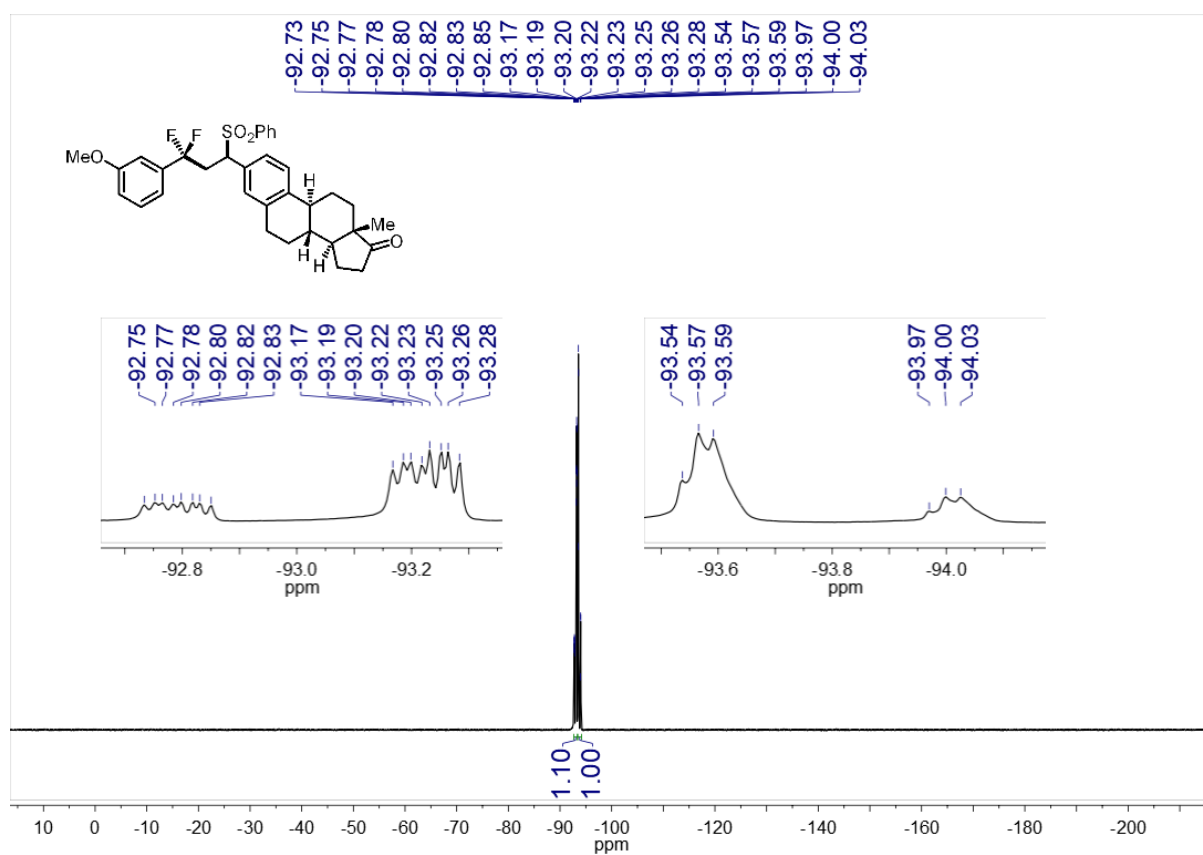

<sup>19</sup>F NMR spectrum (565 MHz, CDCl<sub>3</sub>, 23 °C) of **5ag**

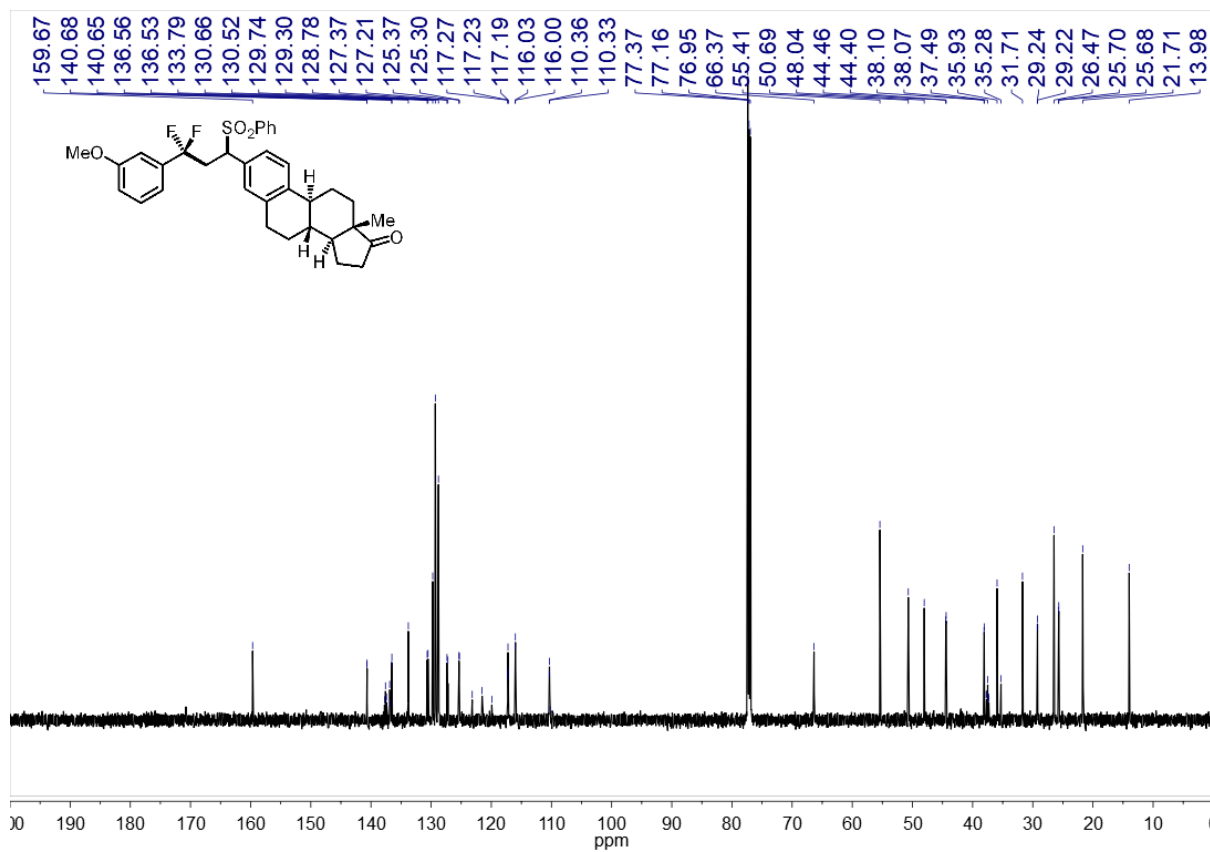

<sup>13</sup>C NMR spectrum (151 MHz, CDCl<sub>3</sub>, 23 °C) of **5ag**

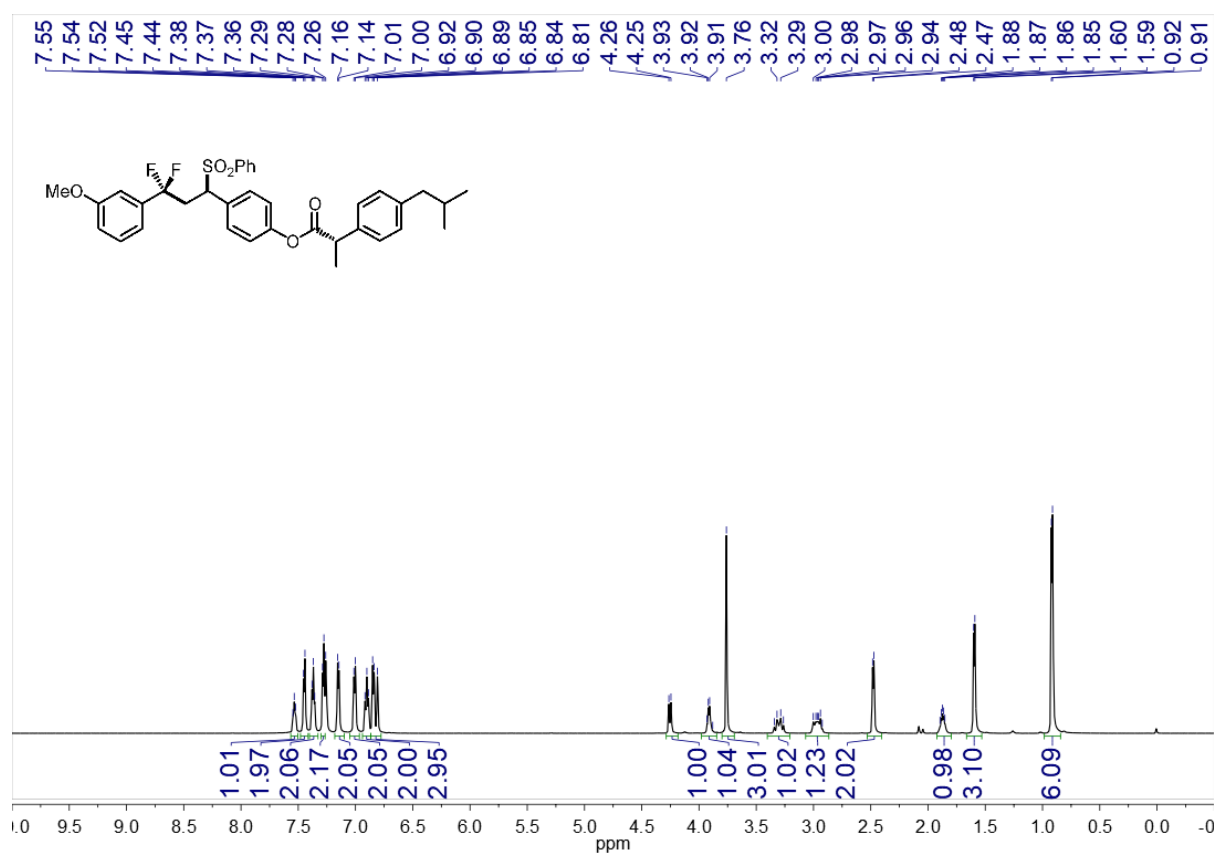

<sup>1</sup>H NMR spectrum (600 MHz, CDCl<sub>3</sub>, 23 °C) of **5ah**

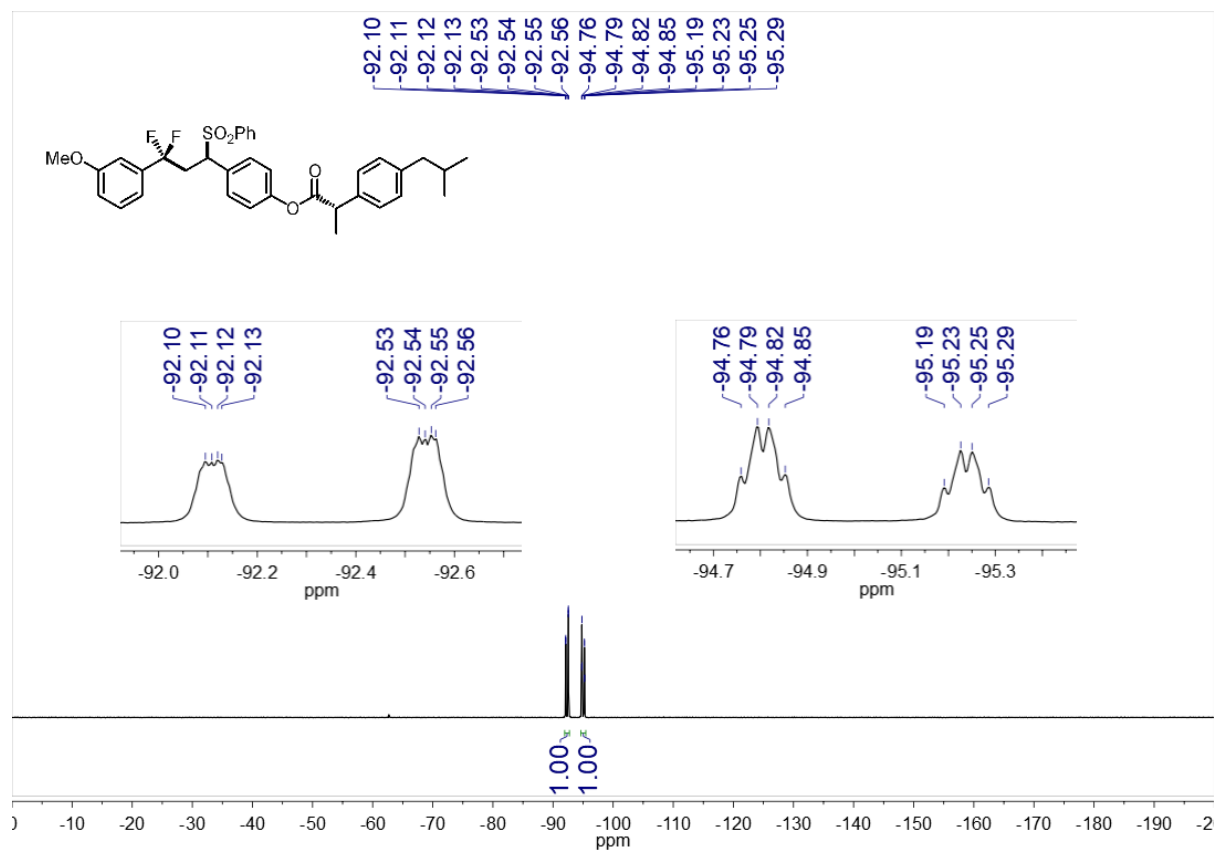

<sup>19</sup>F NMR spectrum (565 MHz, CDCl<sub>3</sub>, 23 °C) of **5ah**





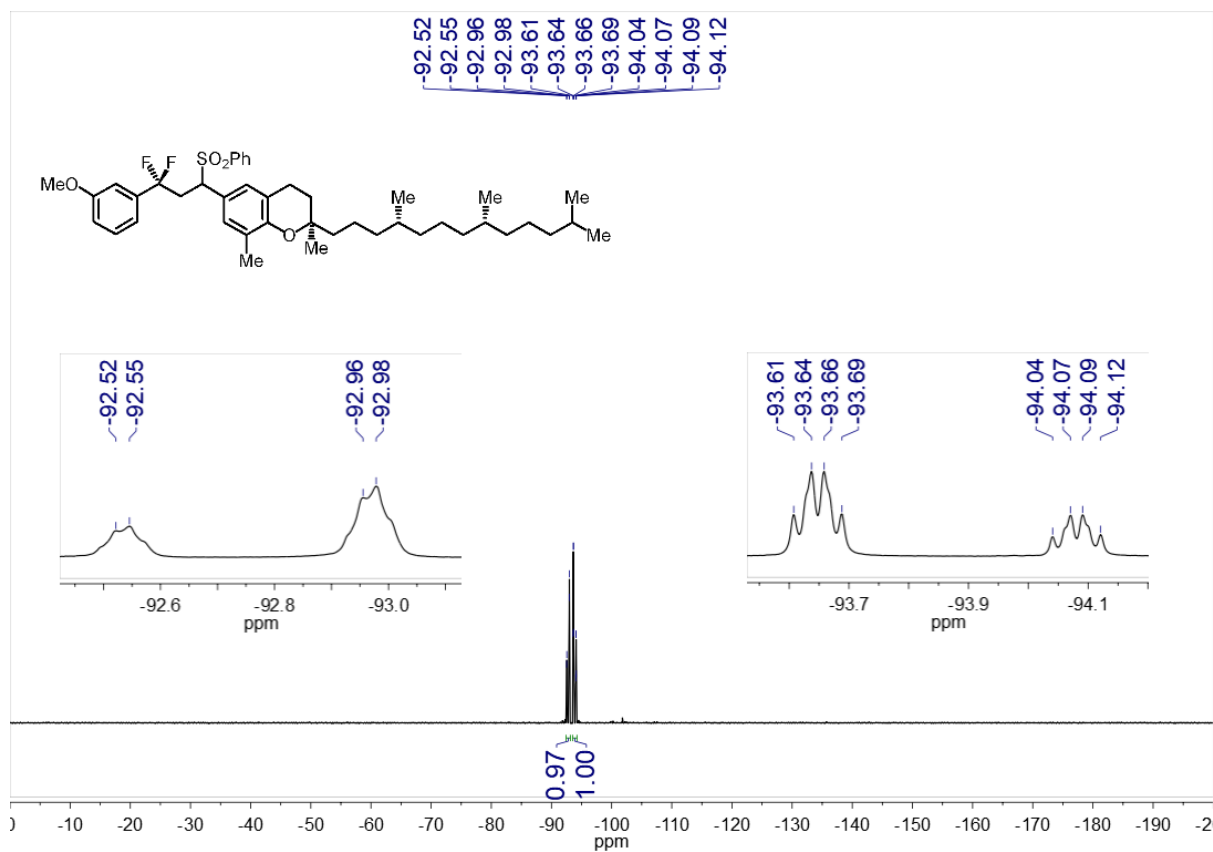

<sup>19</sup>F NMR spectrum (565 MHz, CDCl<sub>3</sub>, 23 °C) of **5ai**

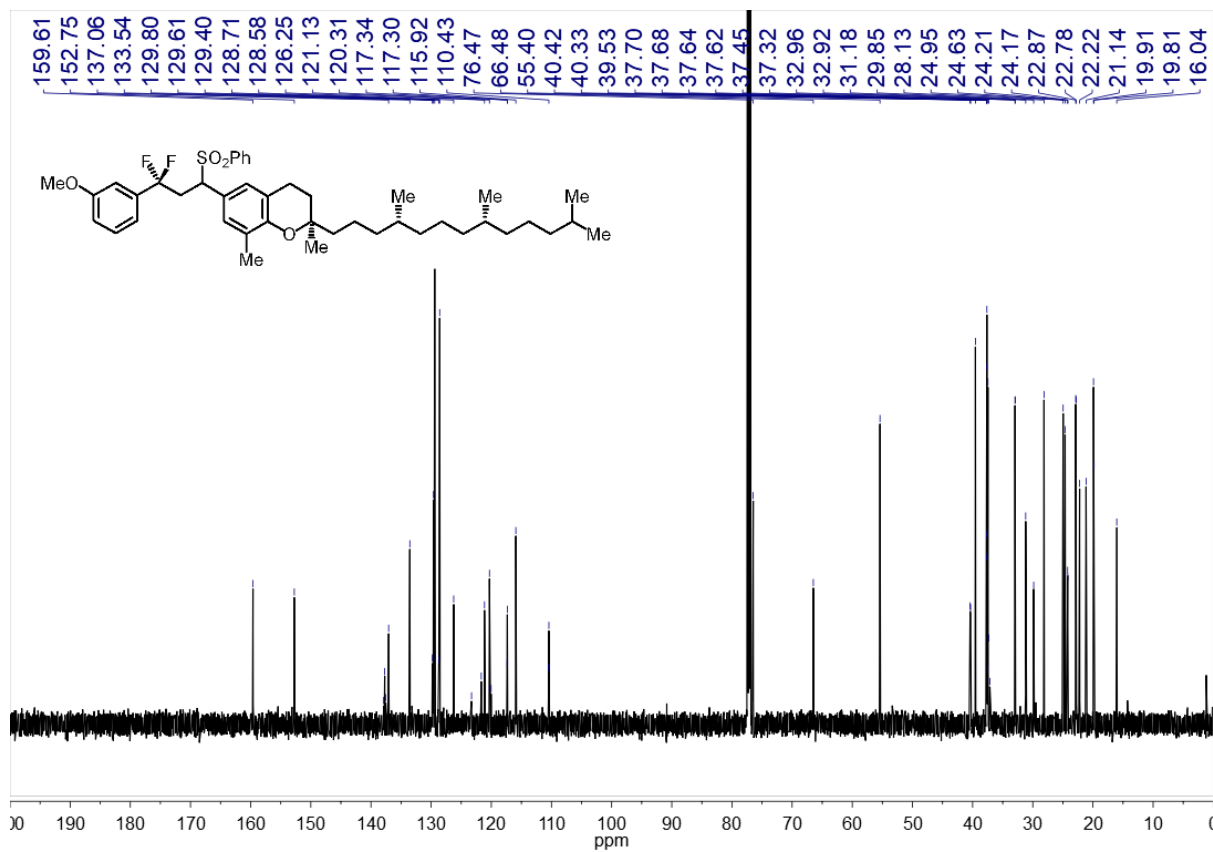

<sup>13</sup>C NMR spectrum (151 MHz, CDCl<sub>3</sub>, 23 °C) of **5ai**

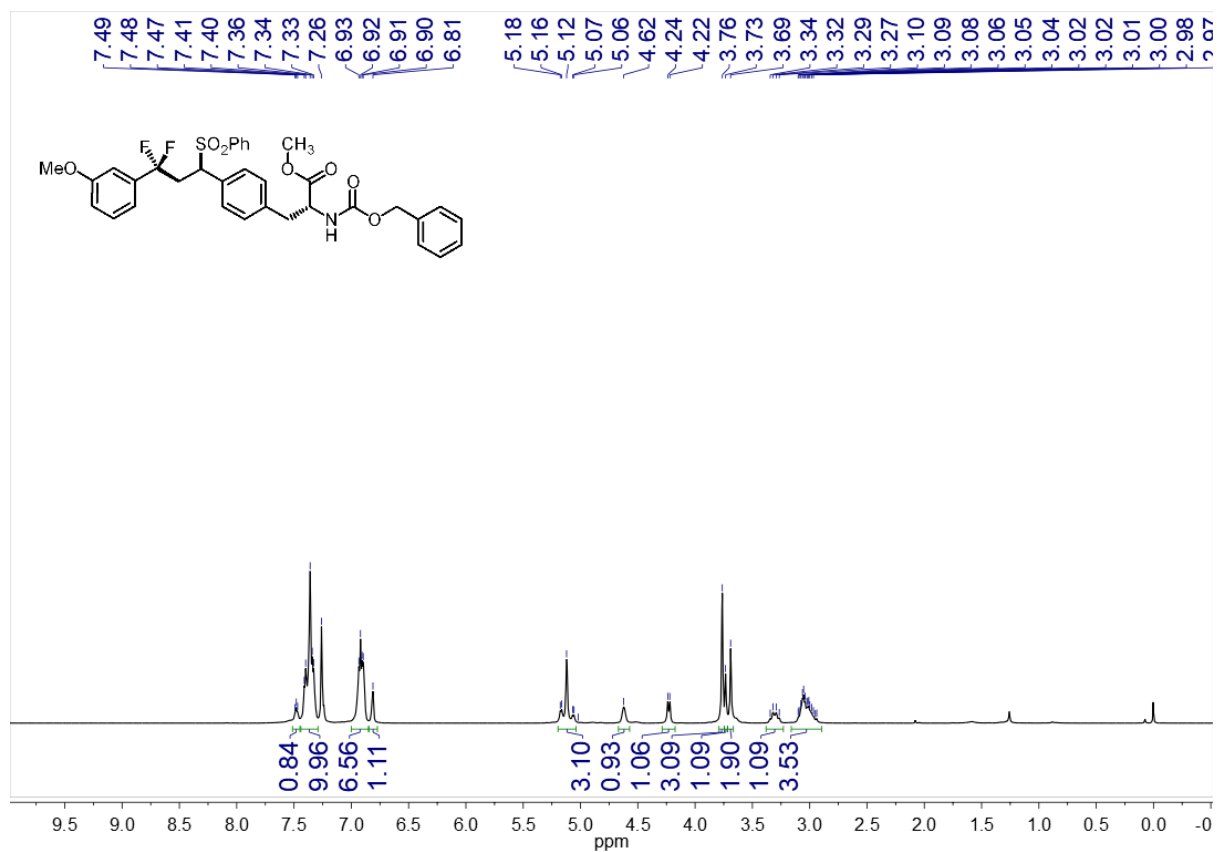

**<sup>1</sup>H NMR spectrum (600 MHz, CDCl<sub>3</sub>, 23 °C) of **5aj****

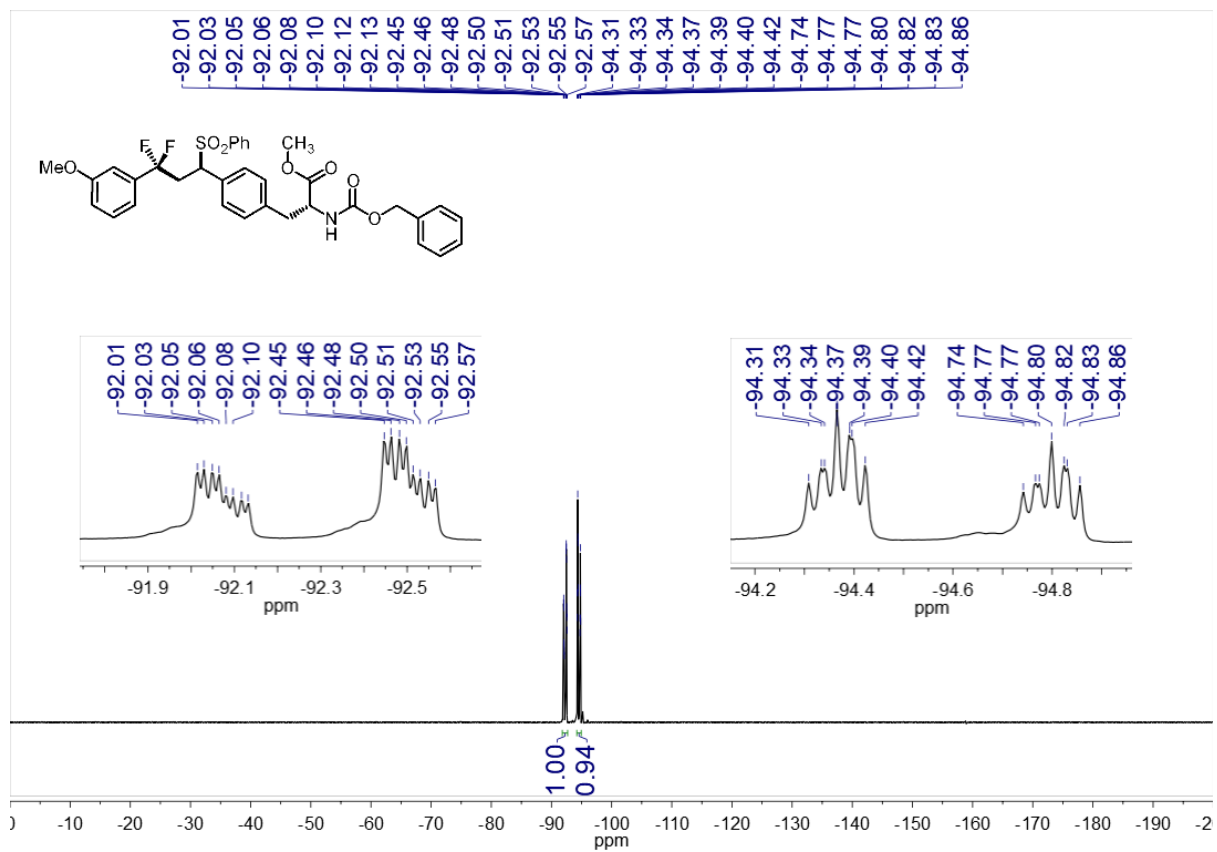

**<sup>19</sup>F NMR spectrum (565 MHz, CDCl<sub>3</sub>, 23 °C) of **5aj****

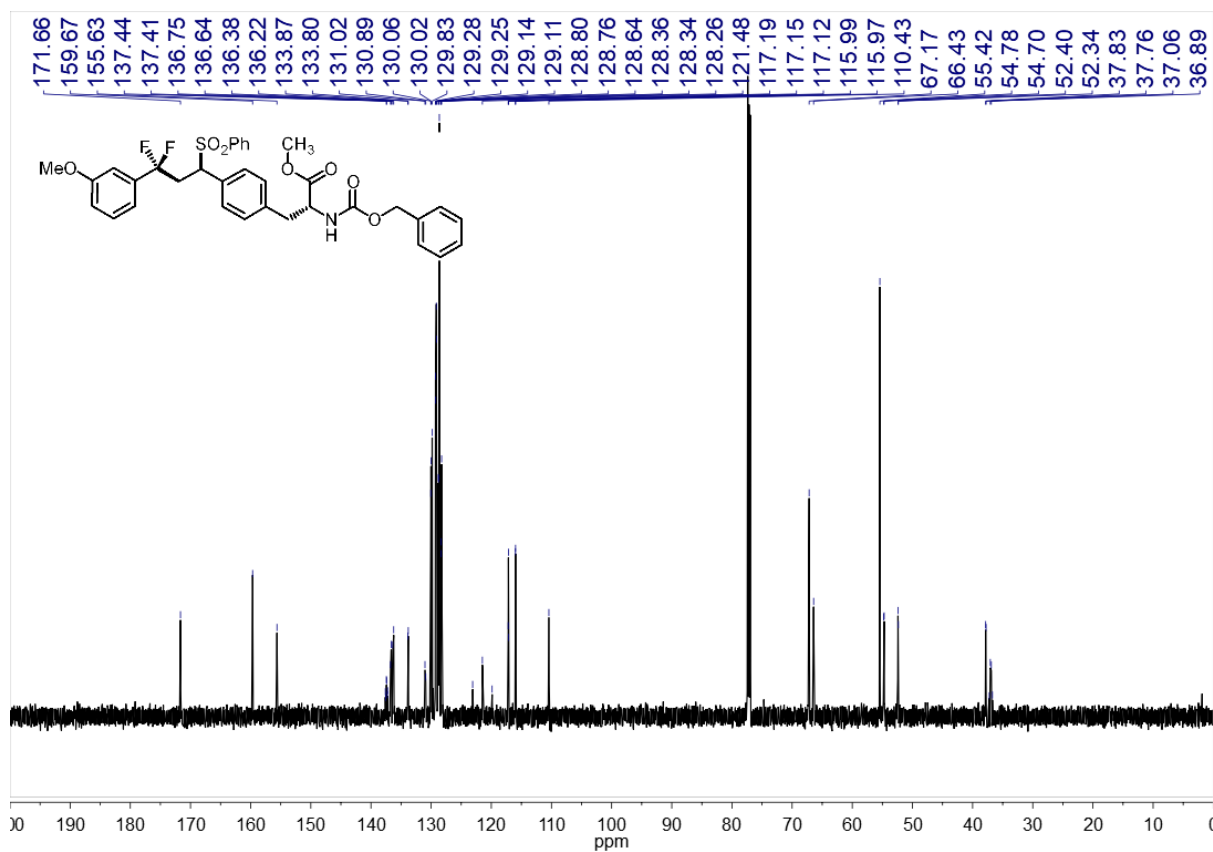

<sup>13</sup>C NMR spectrum (151 MHz, CDCl<sub>3</sub>, 23 °C) of **5aj**

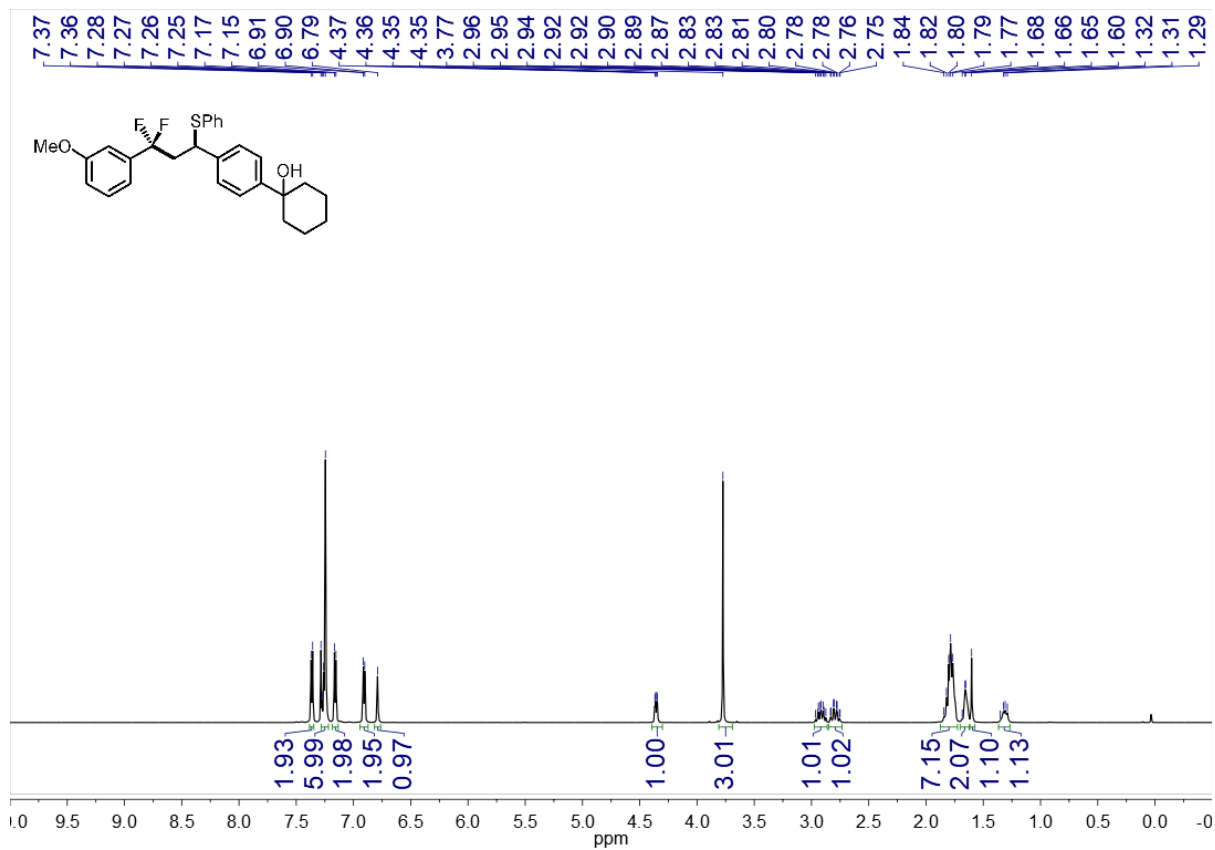

<sup>1</sup>H NMR spectrum (600 MHz, CDCl<sub>3</sub>, 23 °C) of **4b**

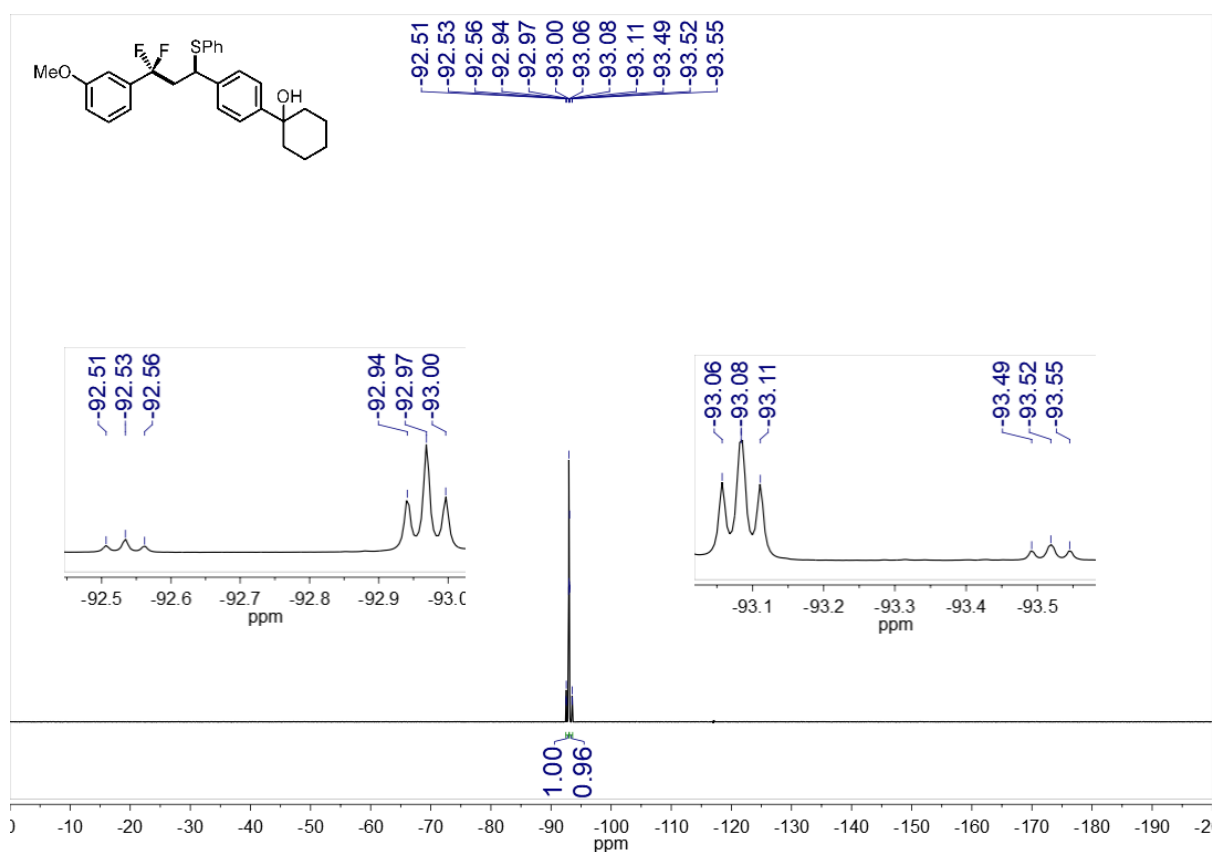

<sup>19</sup>F NMR spectrum (565 MHz, CDCl<sub>3</sub>, 23 °C) of **4b**

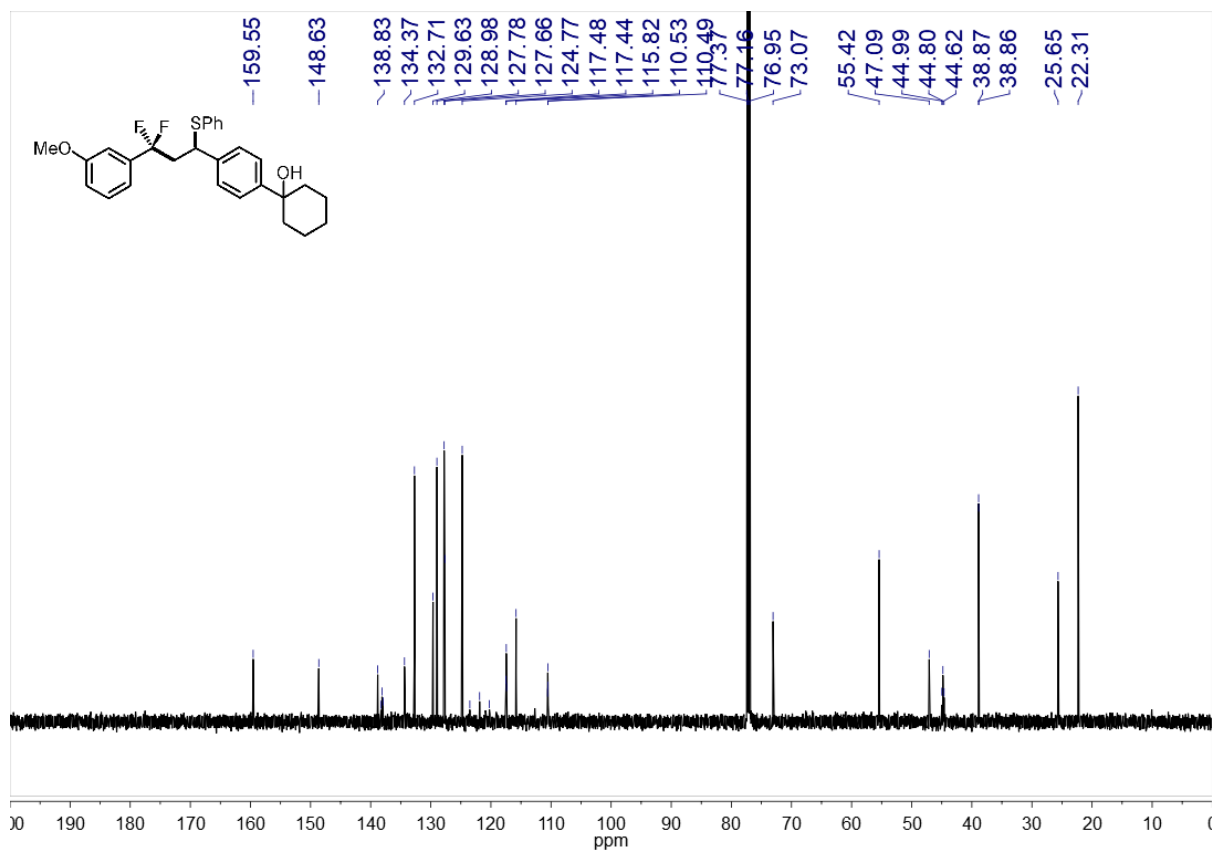

<sup>13</sup>C NMR spectrum (151 MHz, CDCl<sub>3</sub>, 23 °C) of **4b**

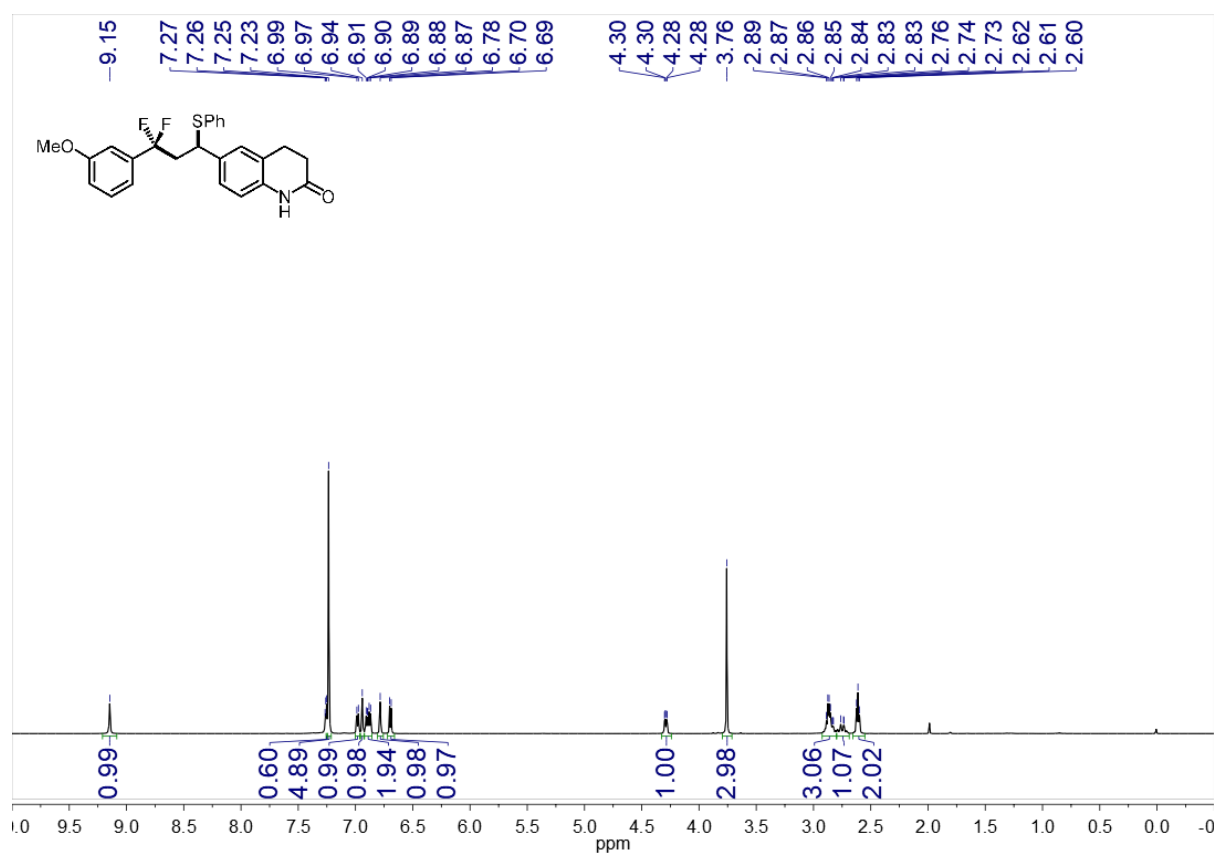

<sup>1</sup>H NMR spectrum (600 MHz, CDCl<sub>3</sub>, 23 °C) of 4c

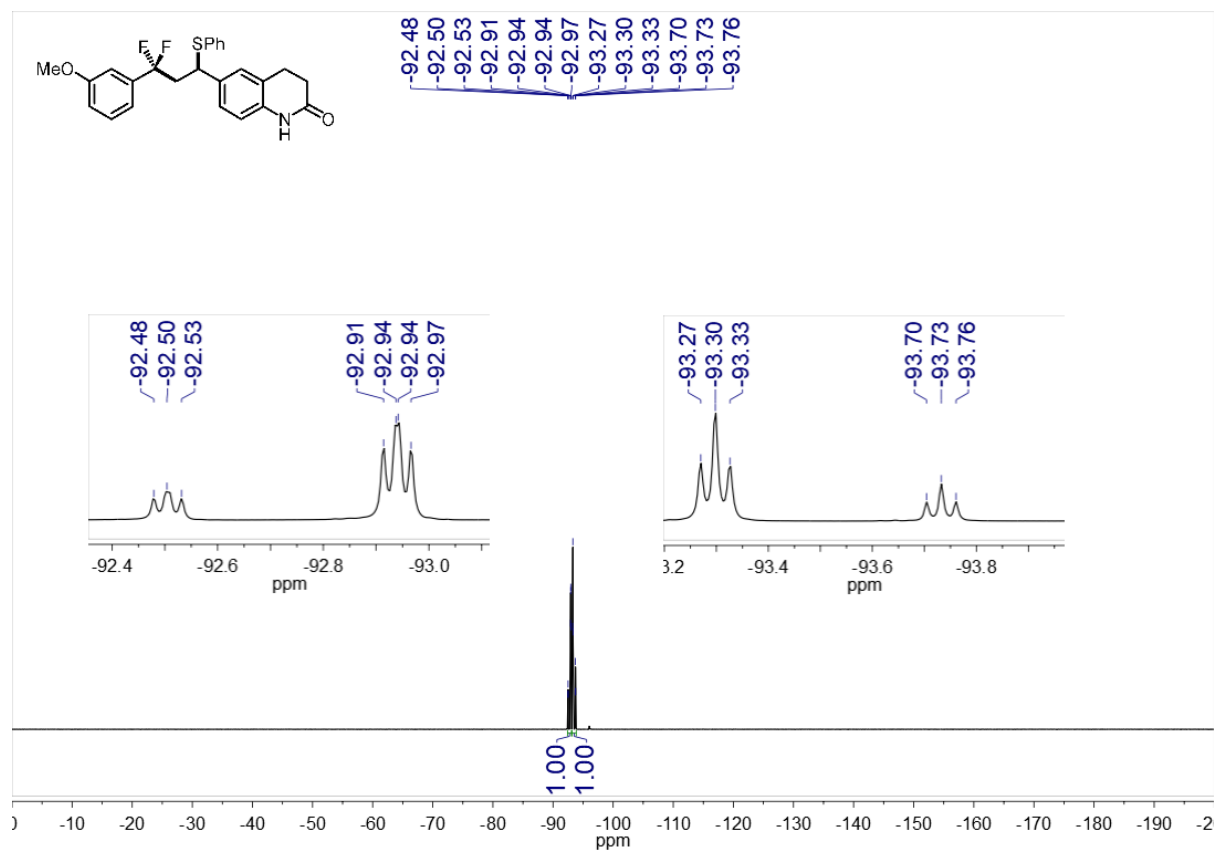

<sup>19</sup>F NMR spectrum (565 MHz, CDCl<sub>3</sub>, 23 °C) of 4c

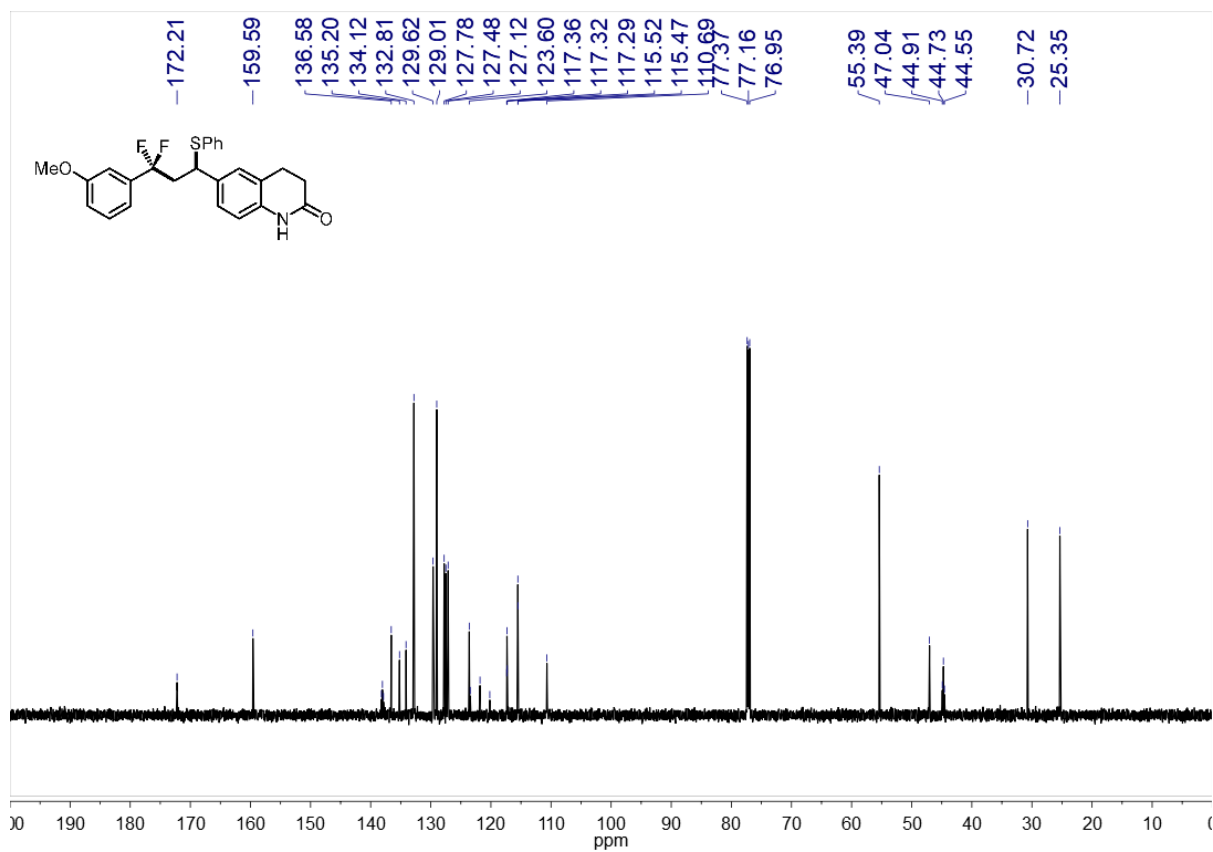

$^{13}\text{C}$  NMR spectrum (151 MHz,  $\text{CDCl}_3$ , 23 °C) of **4c**

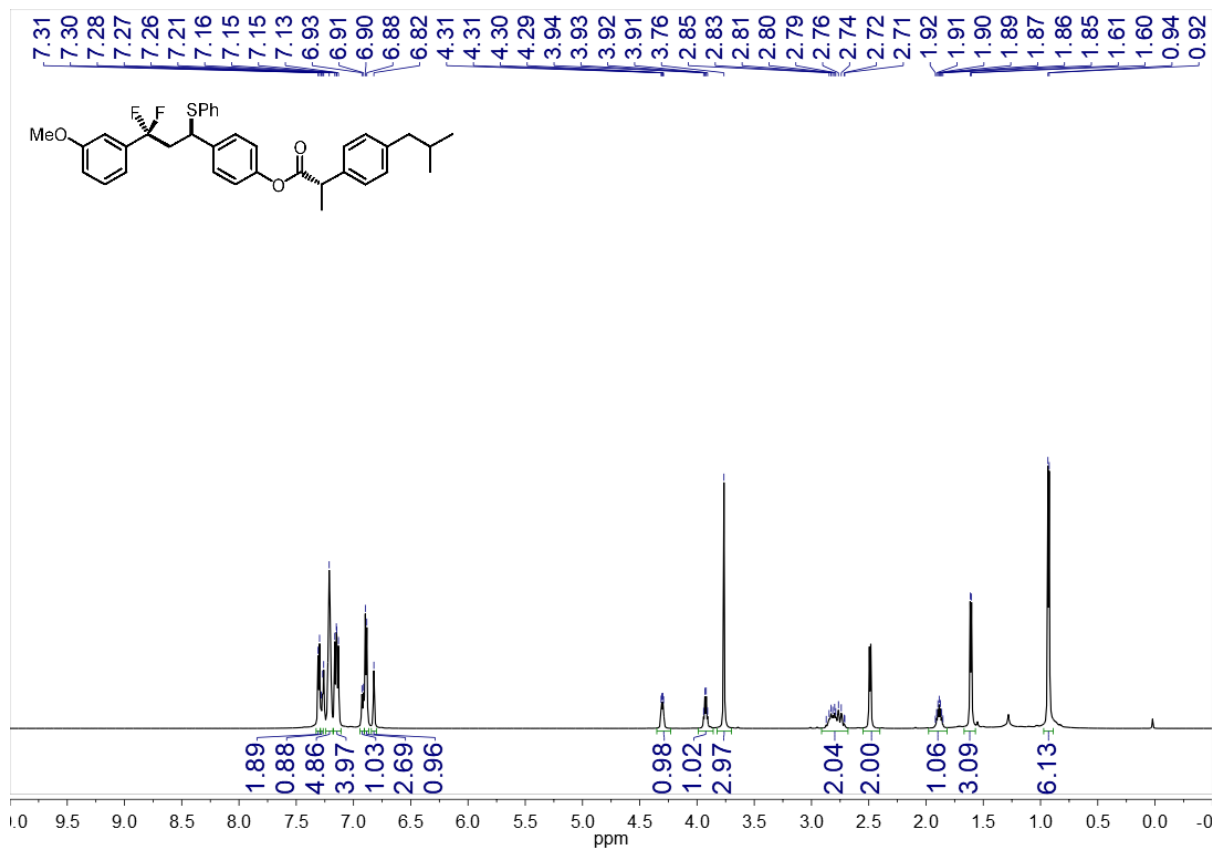

$^1\text{H}$  NMR spectrum (600 MHz,  $\text{CDCl}_3$ , 23 °C) of **4d**

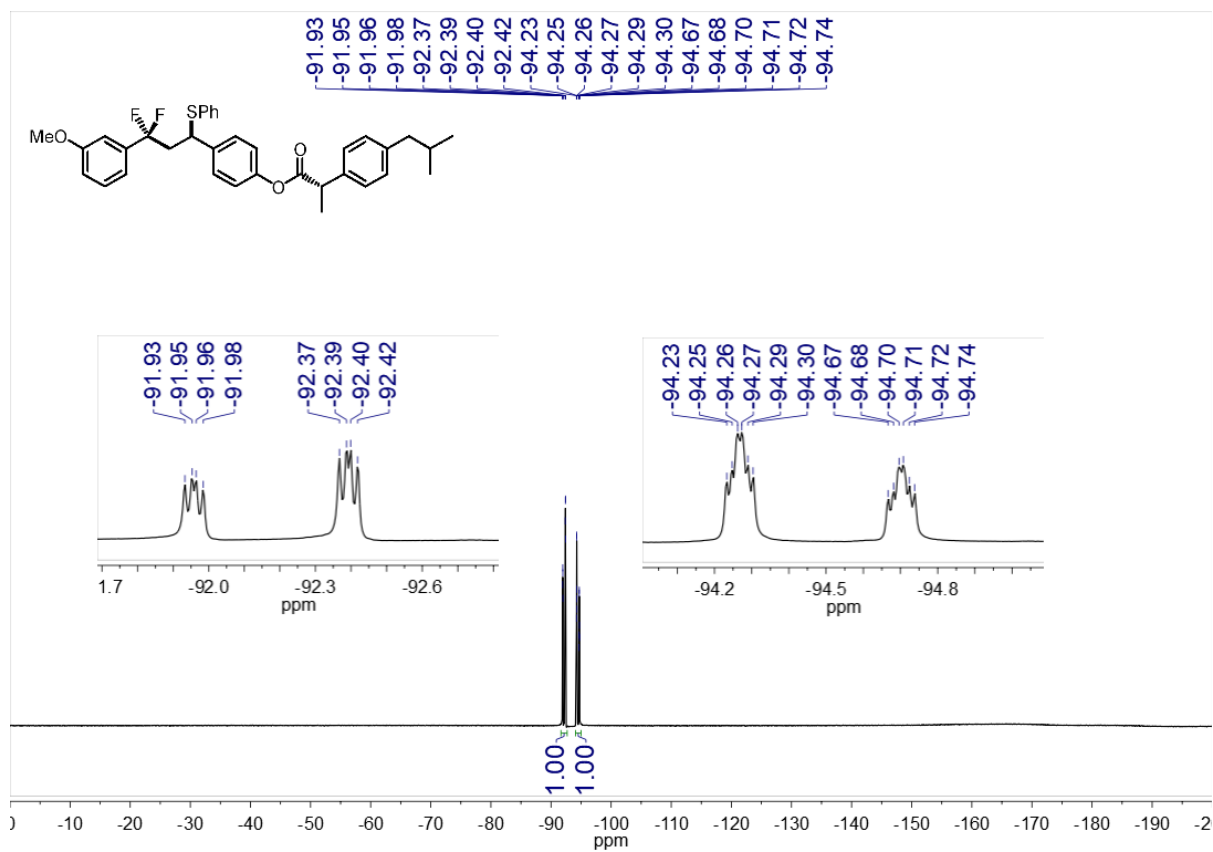

<sup>19</sup>F NMR spectrum (565 MHz, CDCl<sub>3</sub>, 23 °C) of **4d**

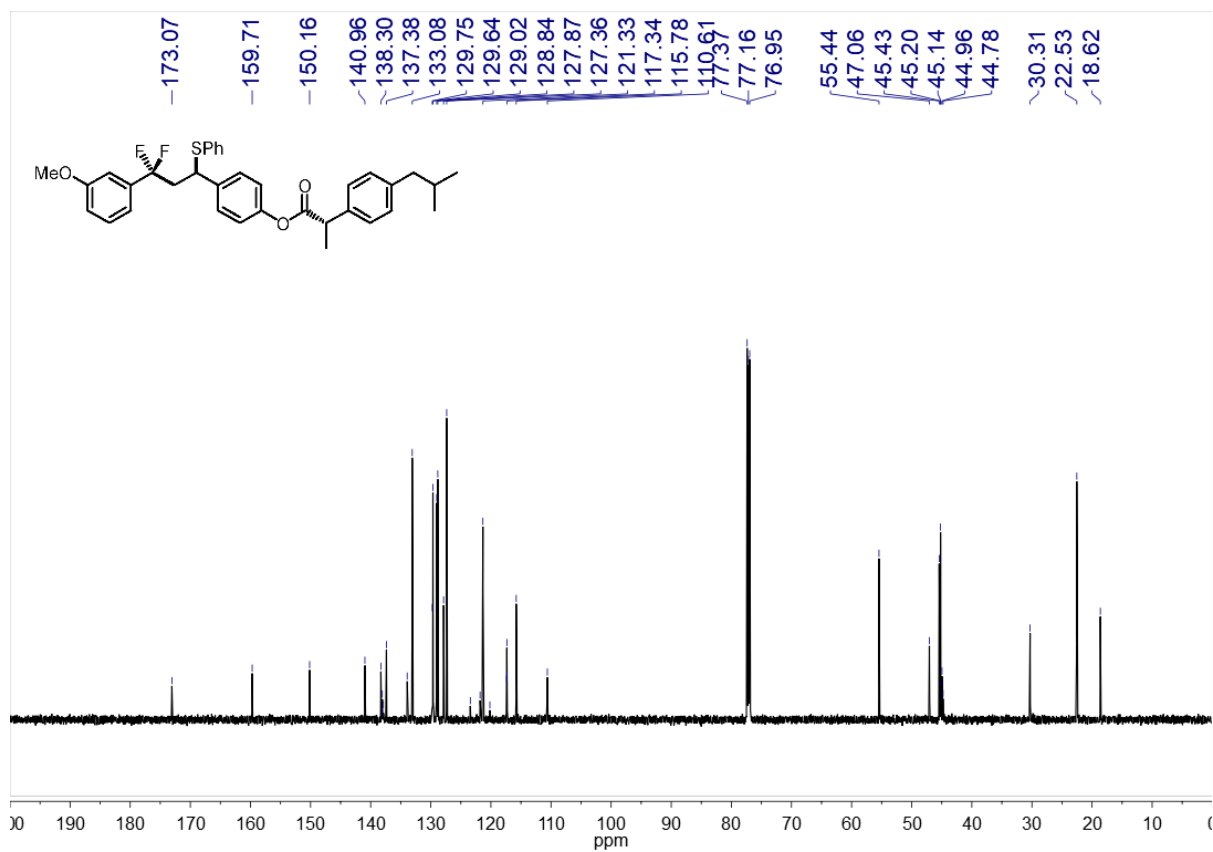

<sup>13</sup>C NMR spectrum (151 MHz, CDCl<sub>3</sub>, 23 °C) of **4d**



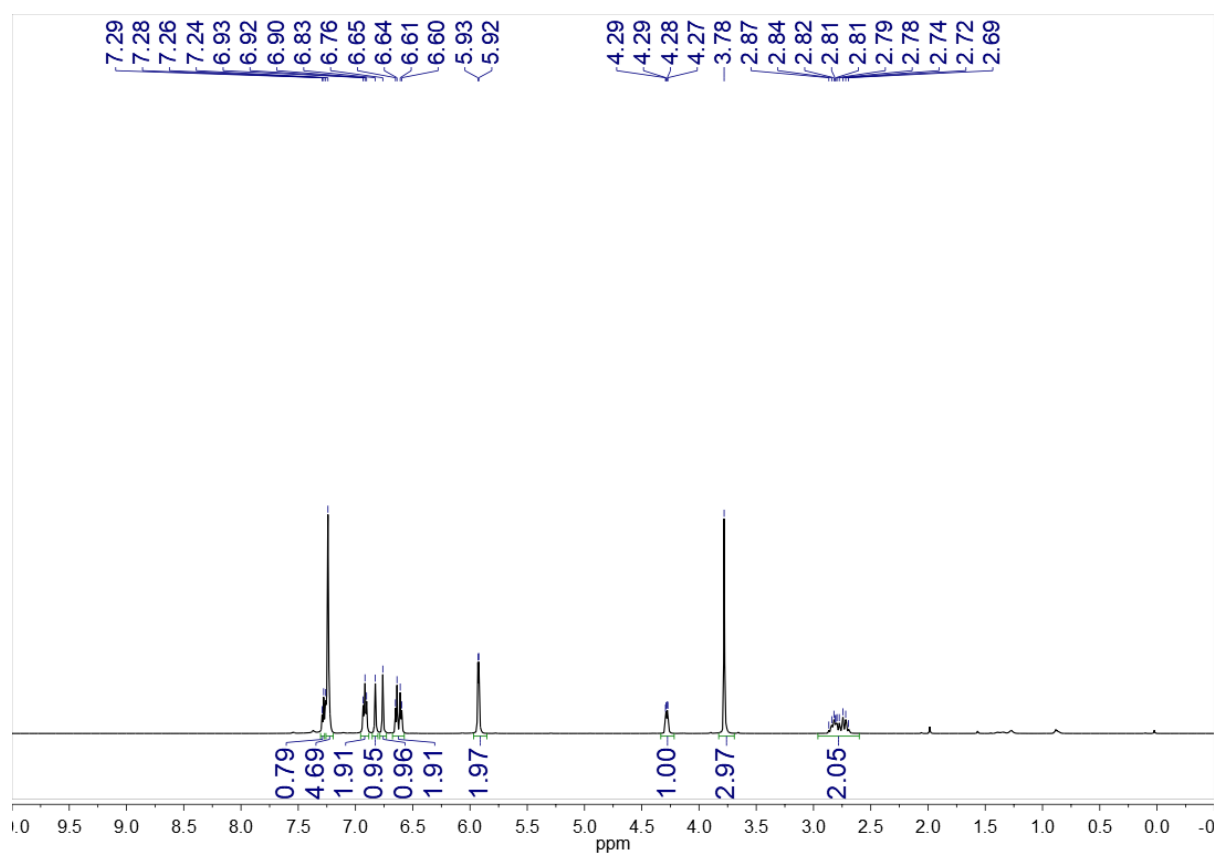

<sup>1</sup>H NMR spectrum (600 MHz, CDCl<sub>3</sub>, 23 °C) of **4e**

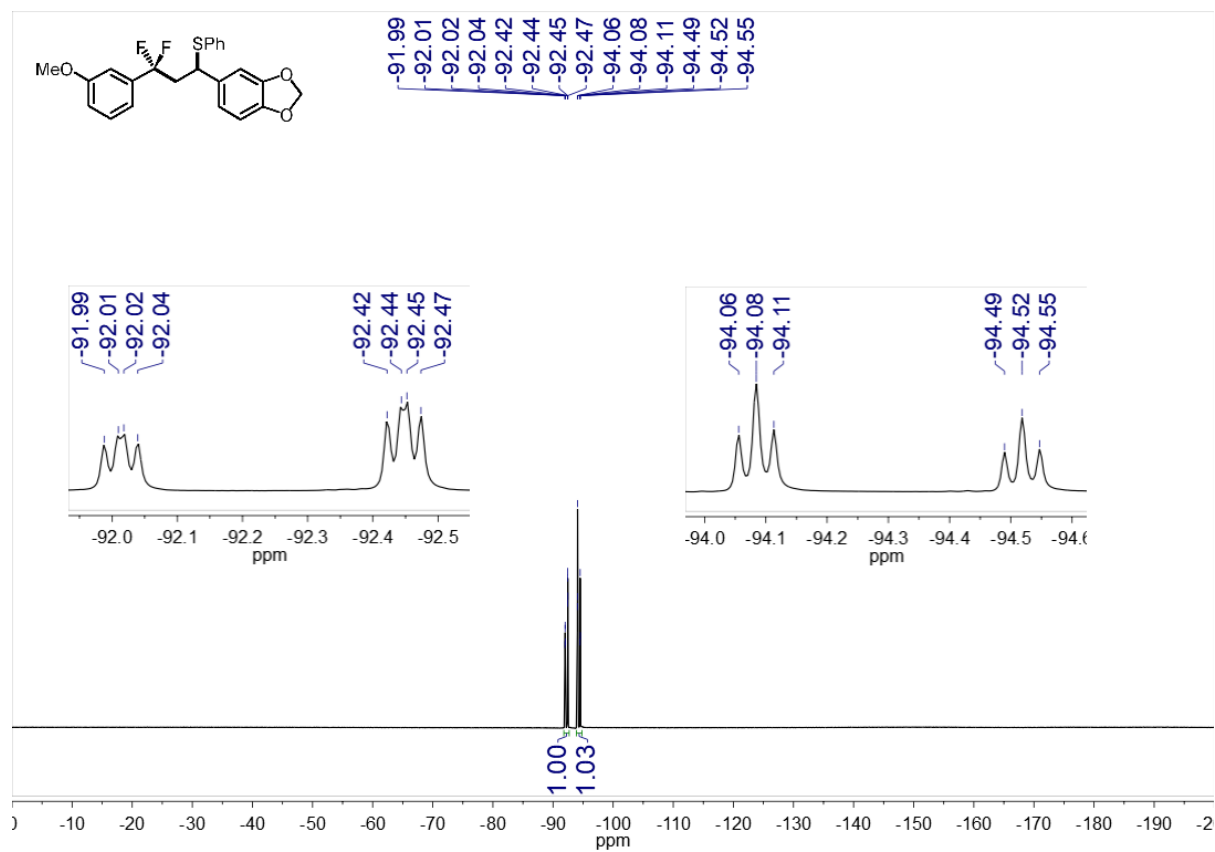

<sup>19</sup>F NMR spectrum (565 MHz, CDCl<sub>3</sub>, 23 °C) of **4e**

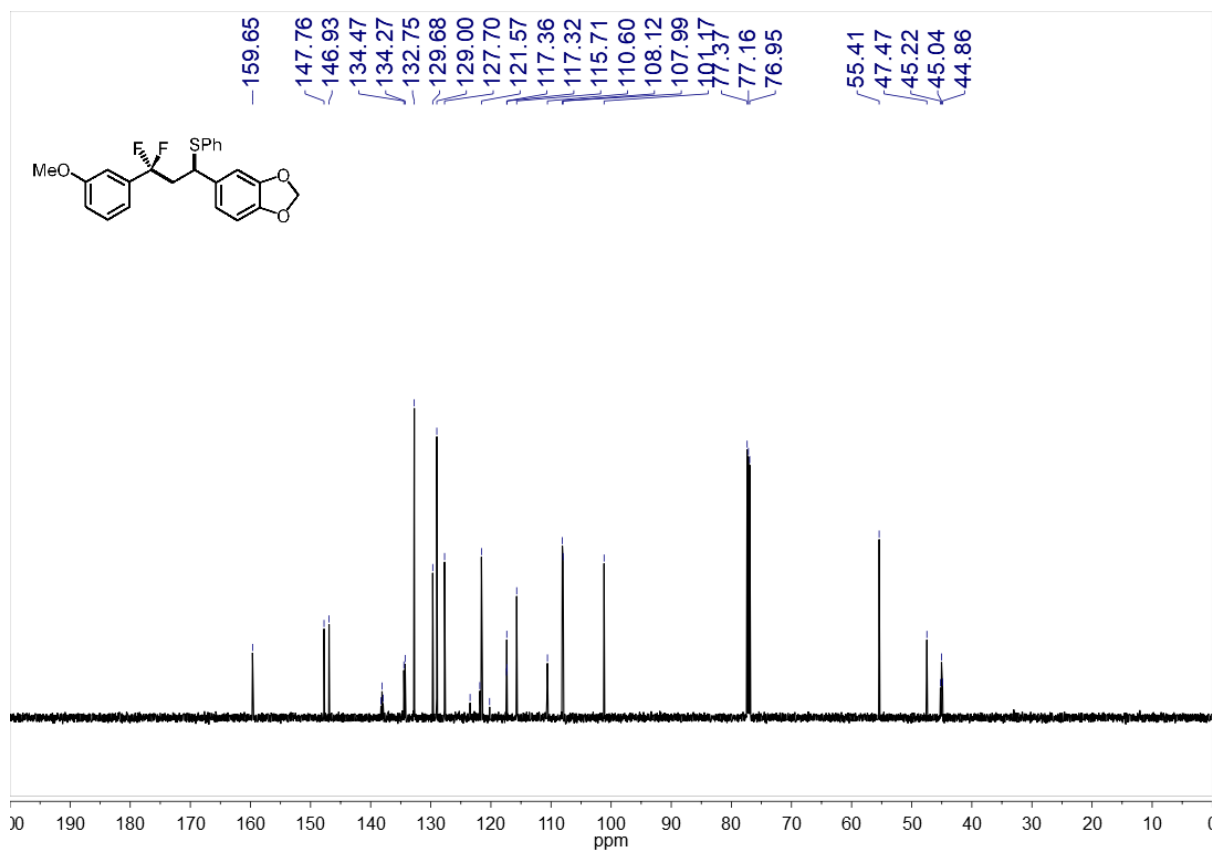

<sup>13</sup>C NMR spectrum (151 MHz, CDCl<sub>3</sub>, 23 °C) of **4e**

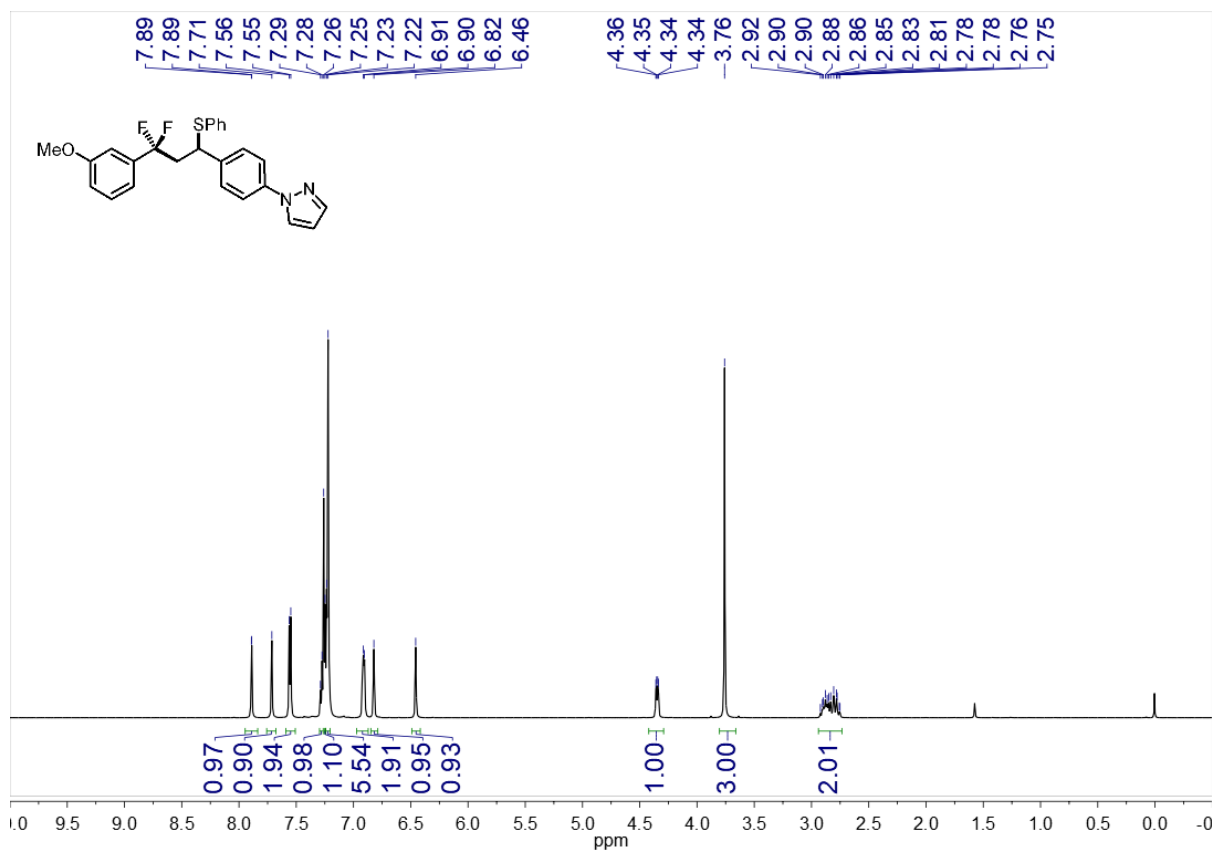

<sup>1</sup>H NMR spectrum (600 MHz, CDCl<sub>3</sub>, 23 °C) of **4f**

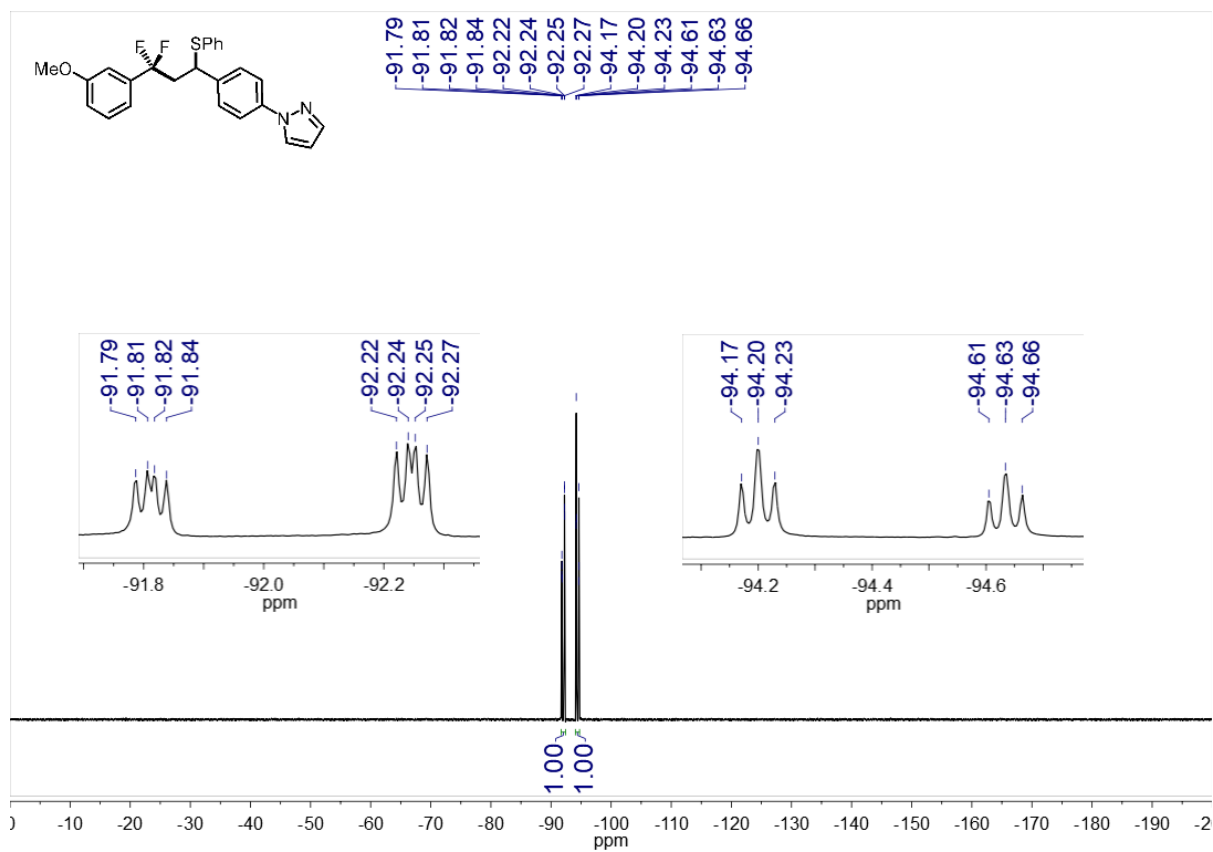

<sup>19</sup>F NMR spectrum (565 MHz, CDCl<sub>3</sub>, 23 °C) of **4f**

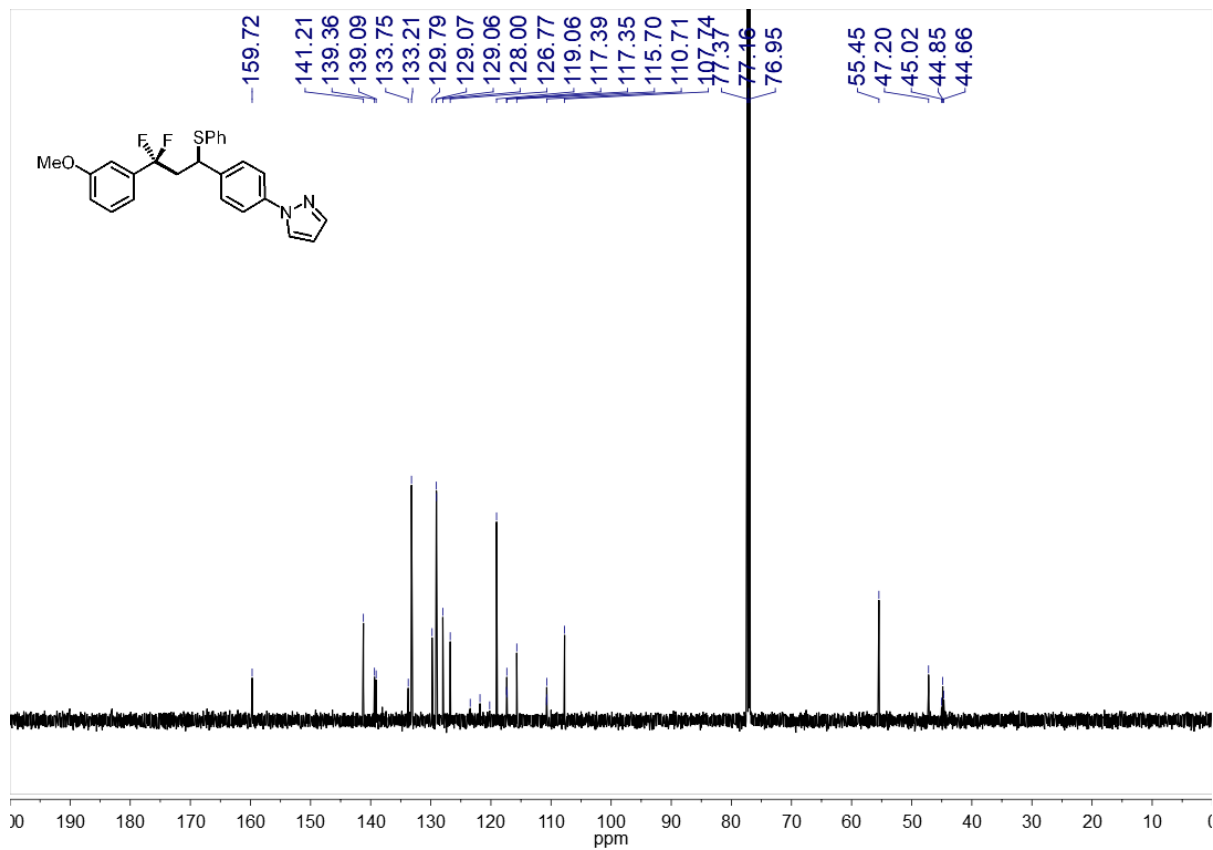

<sup>13</sup>C NMR spectrum (151 MHz, CDCl<sub>3</sub>, 23 °C) of **4f**

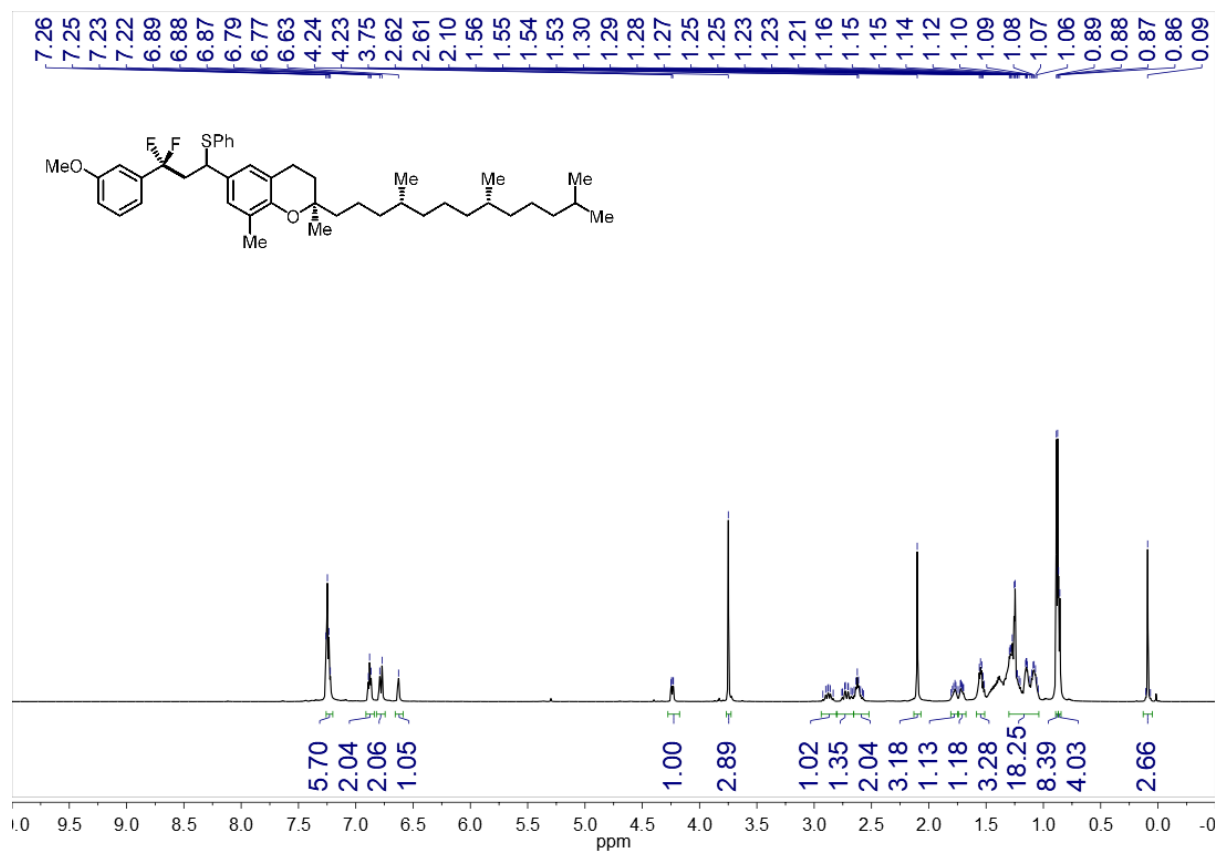

**<sup>1</sup>H NMR spectrum (600 MHz, CDCl<sub>3</sub>, 23 °C) of **4g****

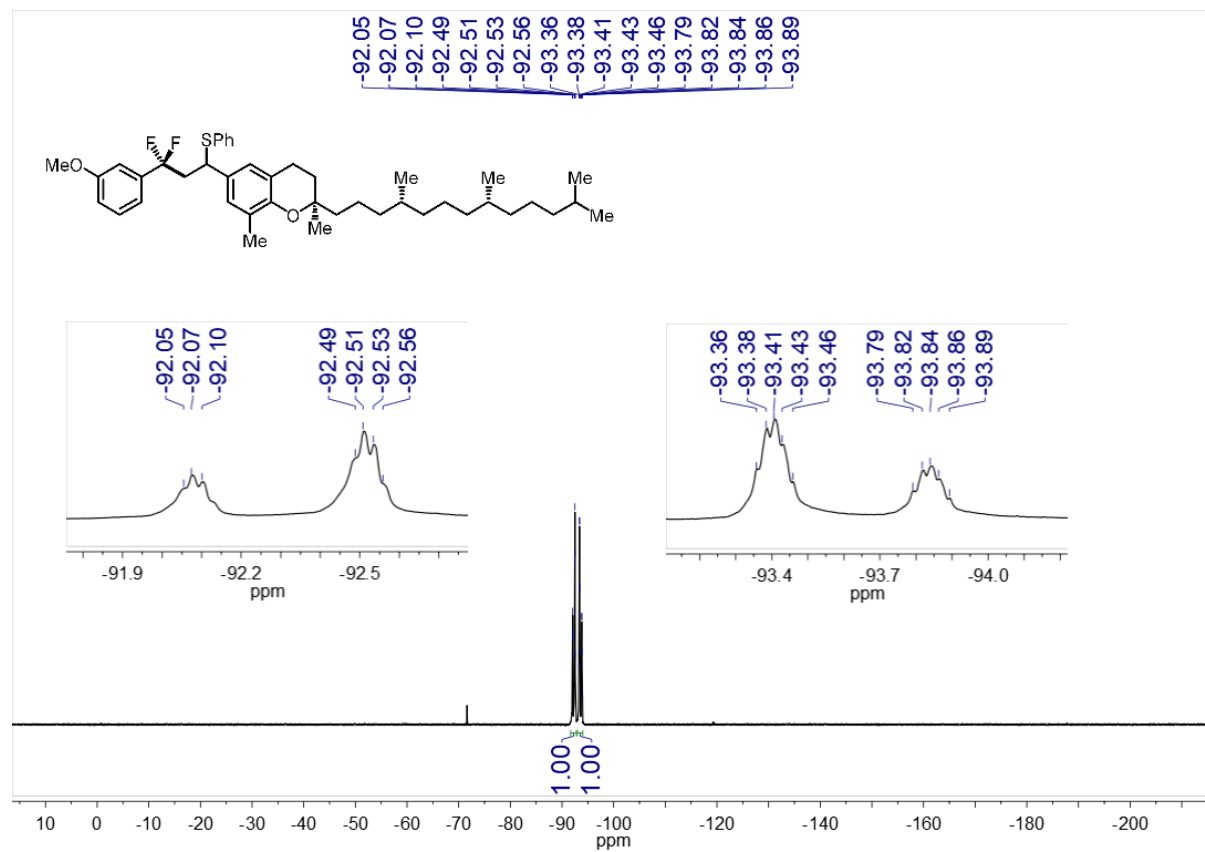

**<sup>19</sup>F NMR spectrum (565 MHz, CDCl<sub>3</sub>, 23 °C) of **4g****

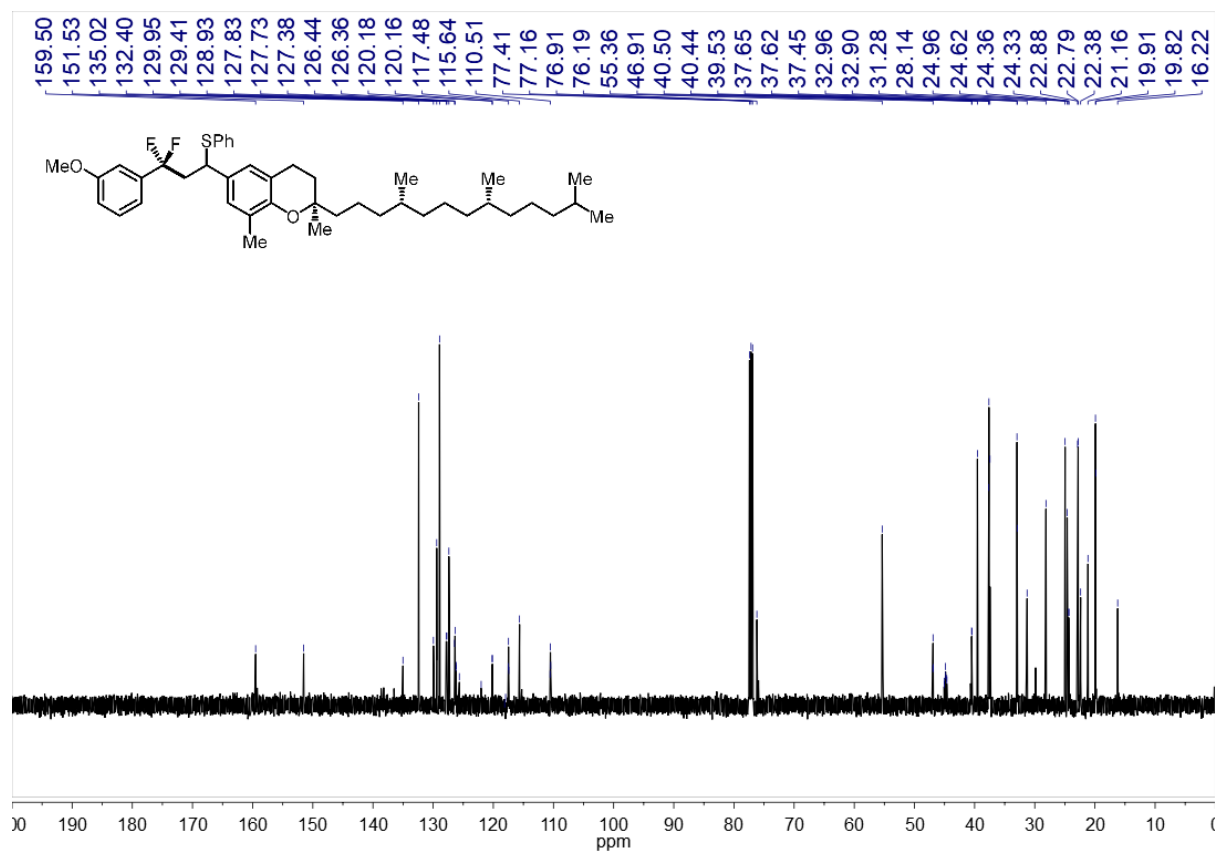

<sup>13</sup>C NMR spectrum (151 MHz, CDCl<sub>3</sub>, 23 °C) of **4g**

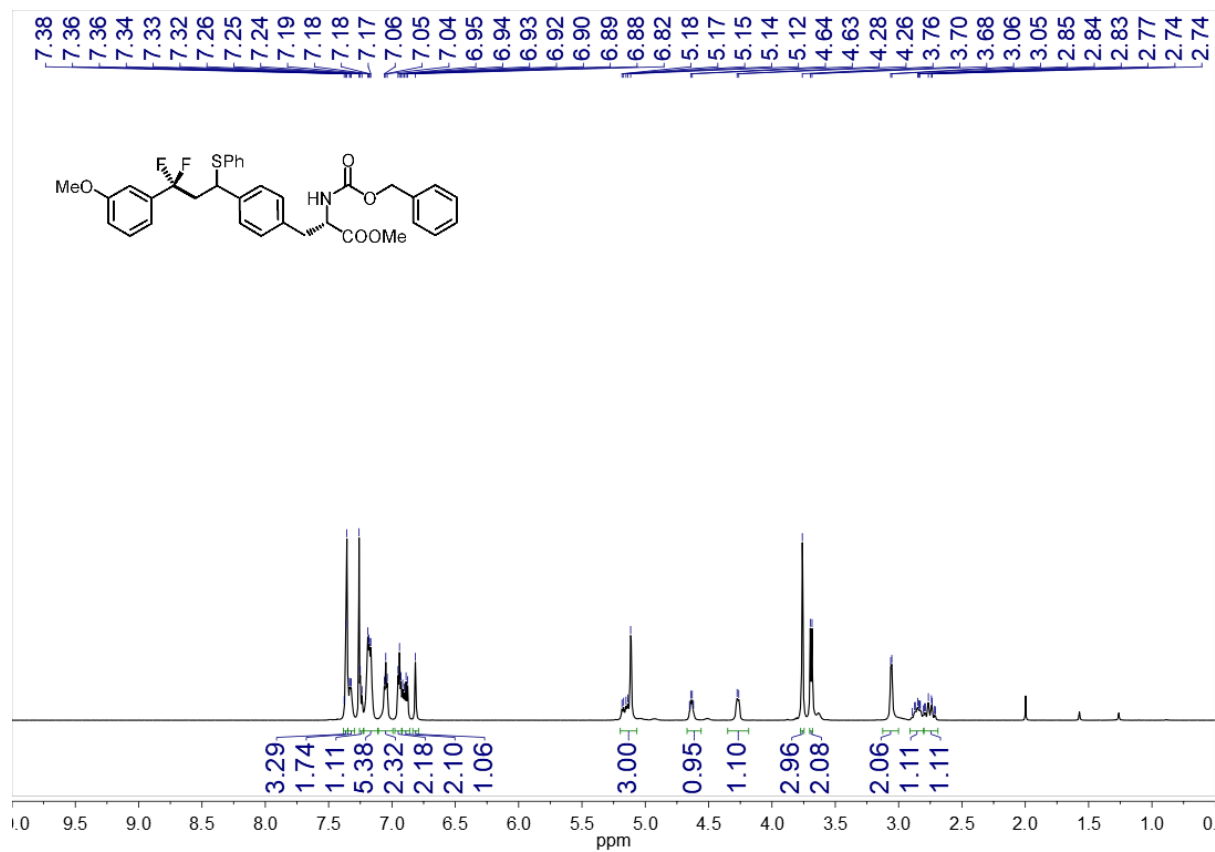

<sup>1</sup>H NMR spectrum (600 MHz, CDCl<sub>3</sub>, 23 °C) of **4h**

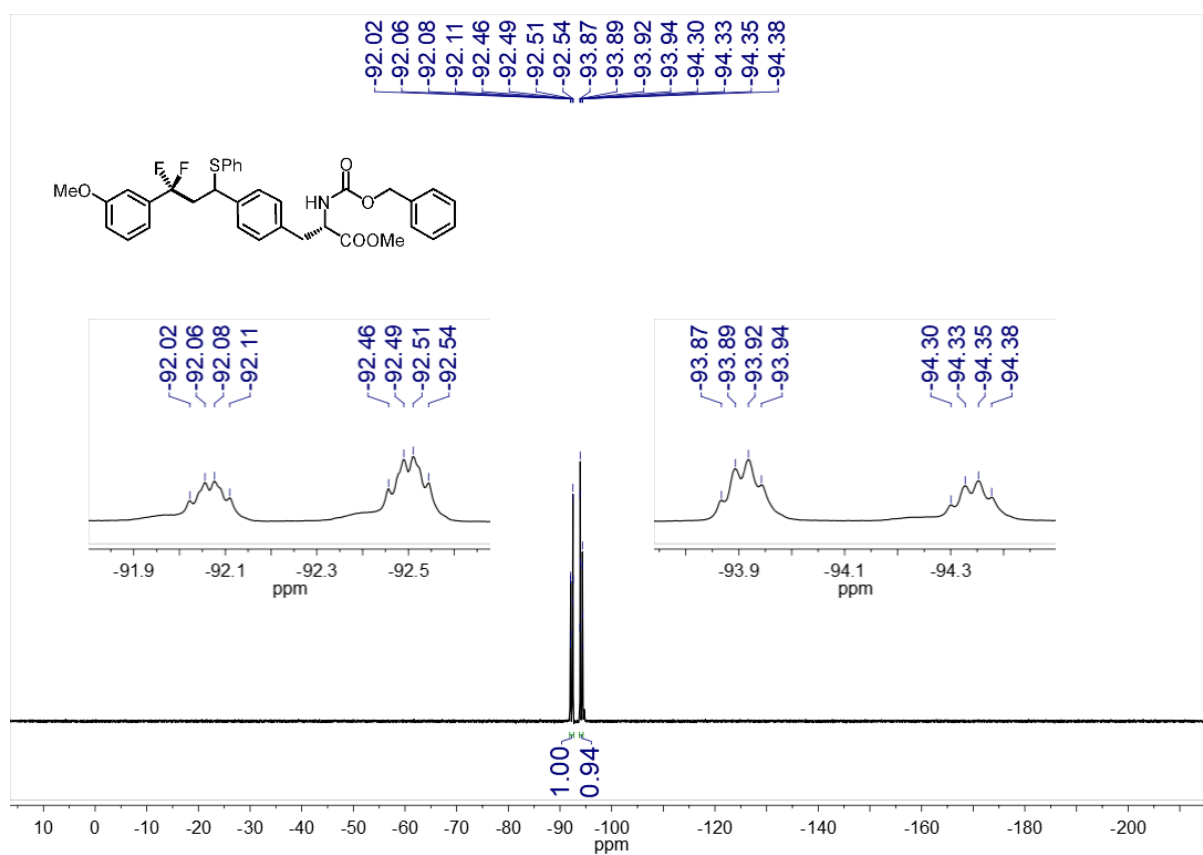

<sup>19</sup>F NMR spectrum (565 MHz, CDCl<sub>3</sub>, 23 °C) of **4h**

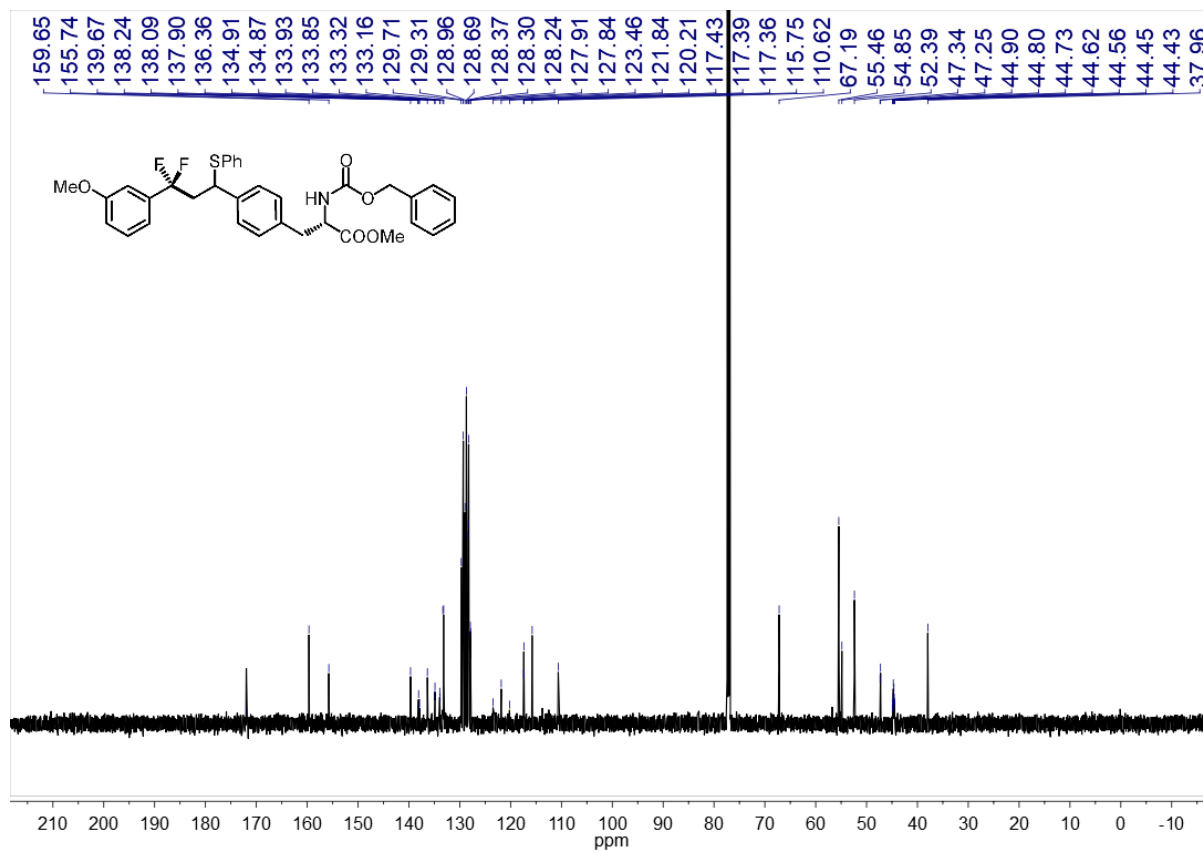

<sup>13</sup>C NMR spectrum (151 MHz, CDCl<sub>3</sub>, 23 °C) of **4h**

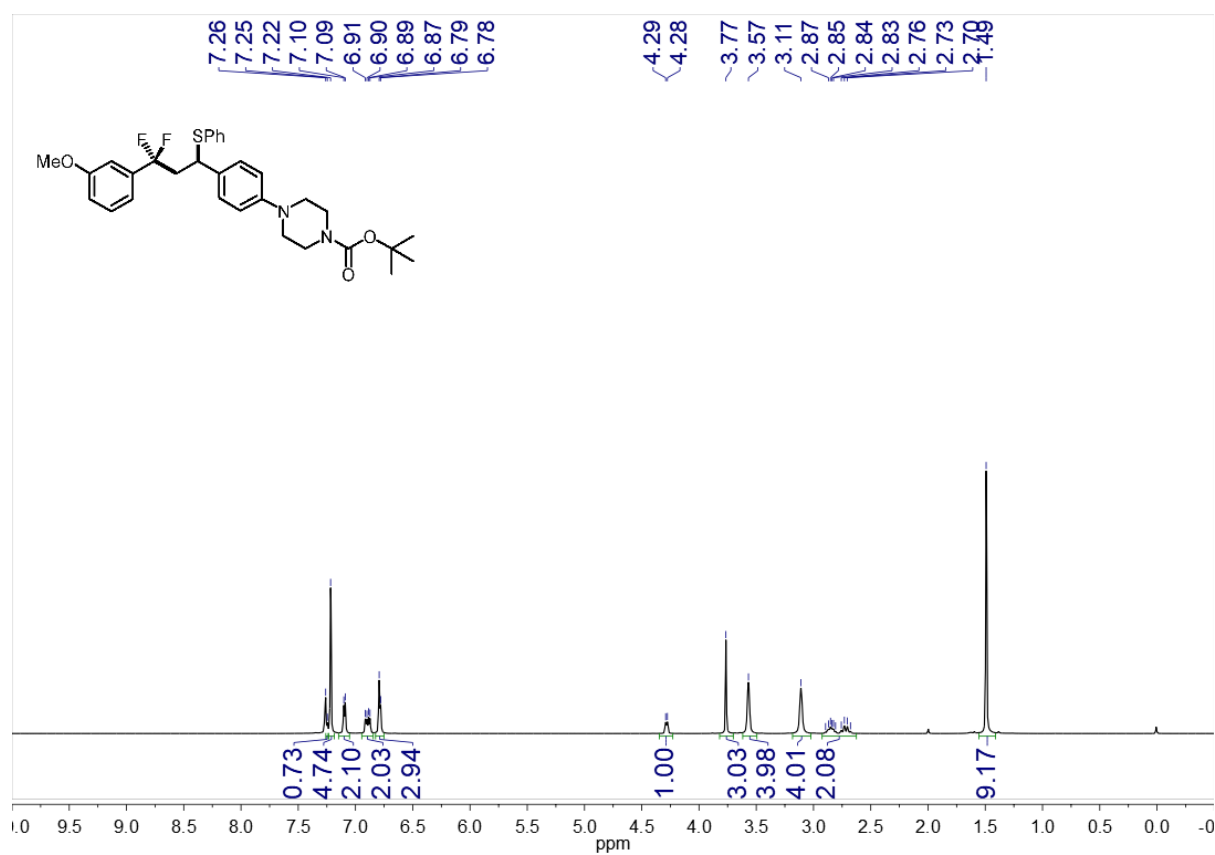

<sup>1</sup>H NMR spectrum (600 MHz, CDCl<sub>3</sub>, 23 °C) of **4i**

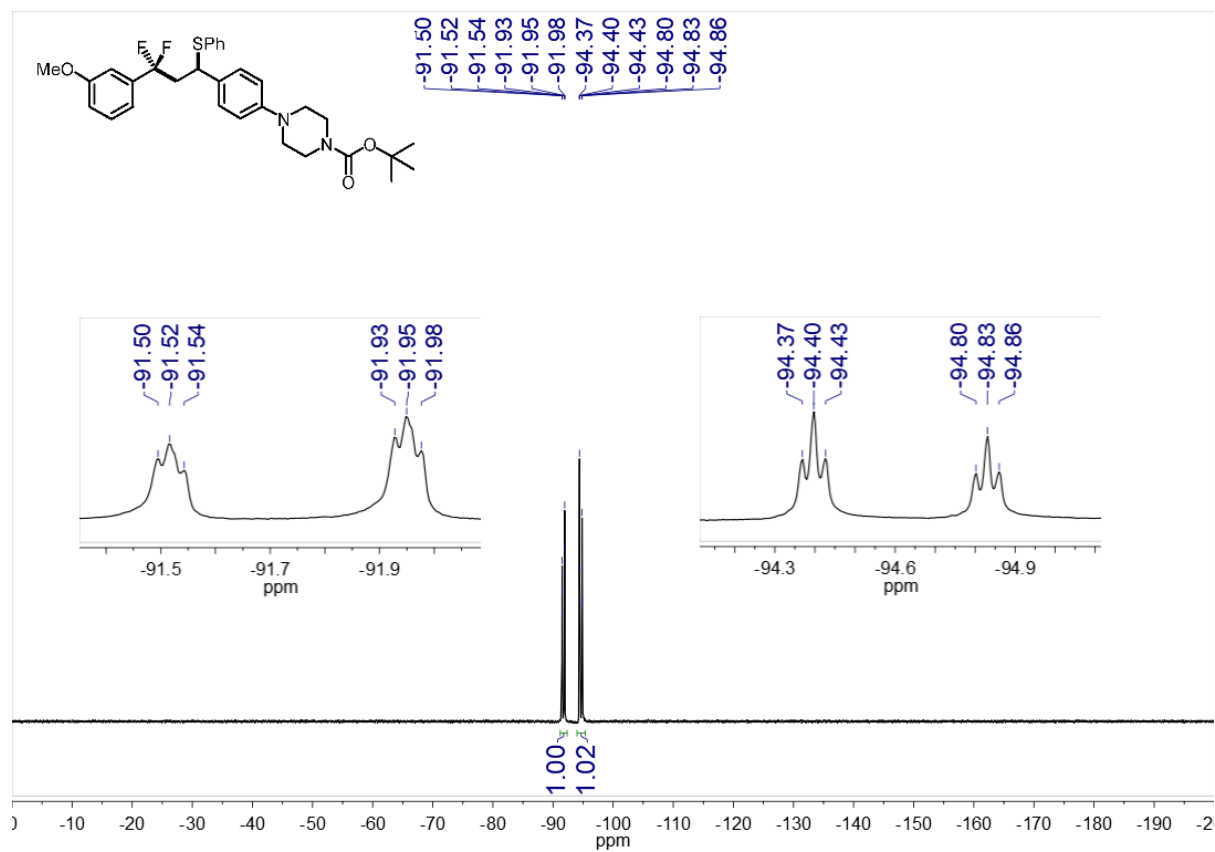

<sup>19</sup>F NMR spectrum (565 MHz, CDCl<sub>3</sub>, 23 °C) of **4i**

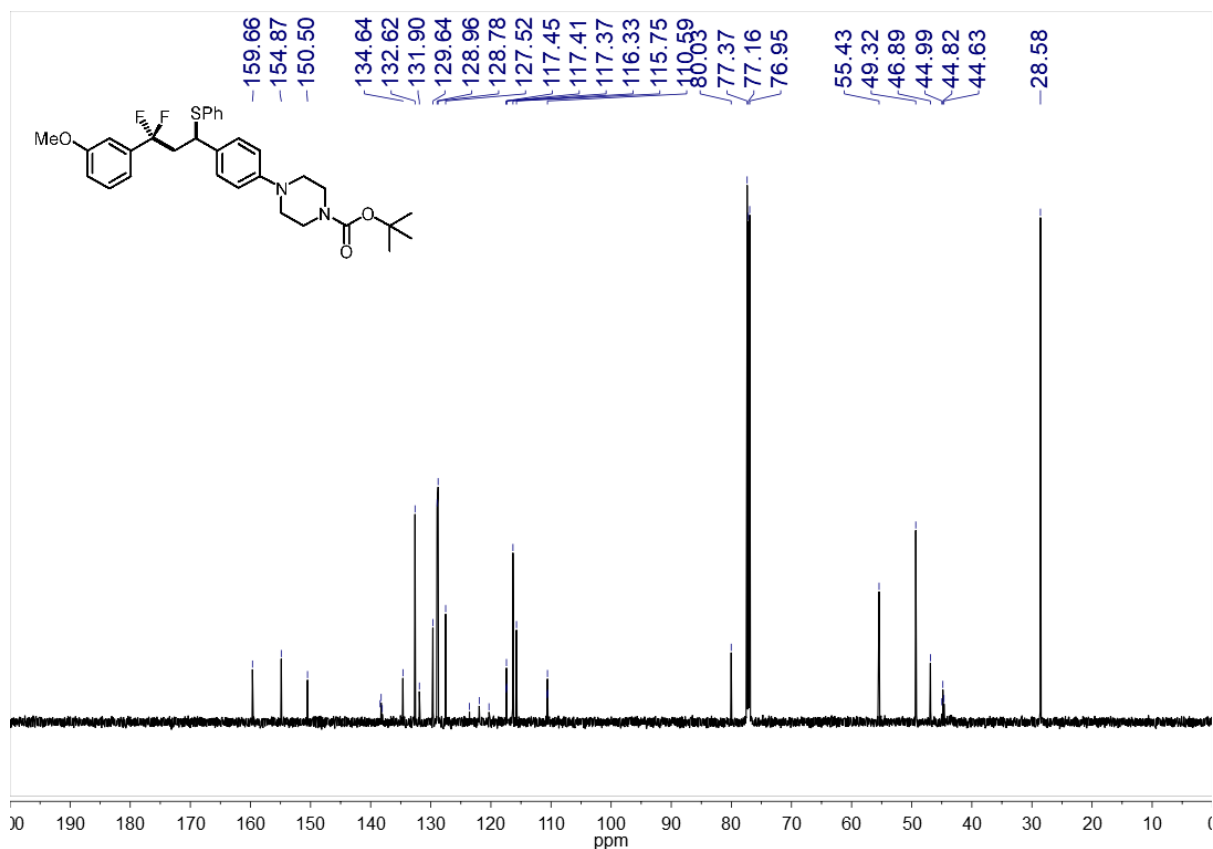

<sup>13</sup>C NMR spectrum (151 MHz, CDCl<sub>3</sub>, 23 °C) of **4i**

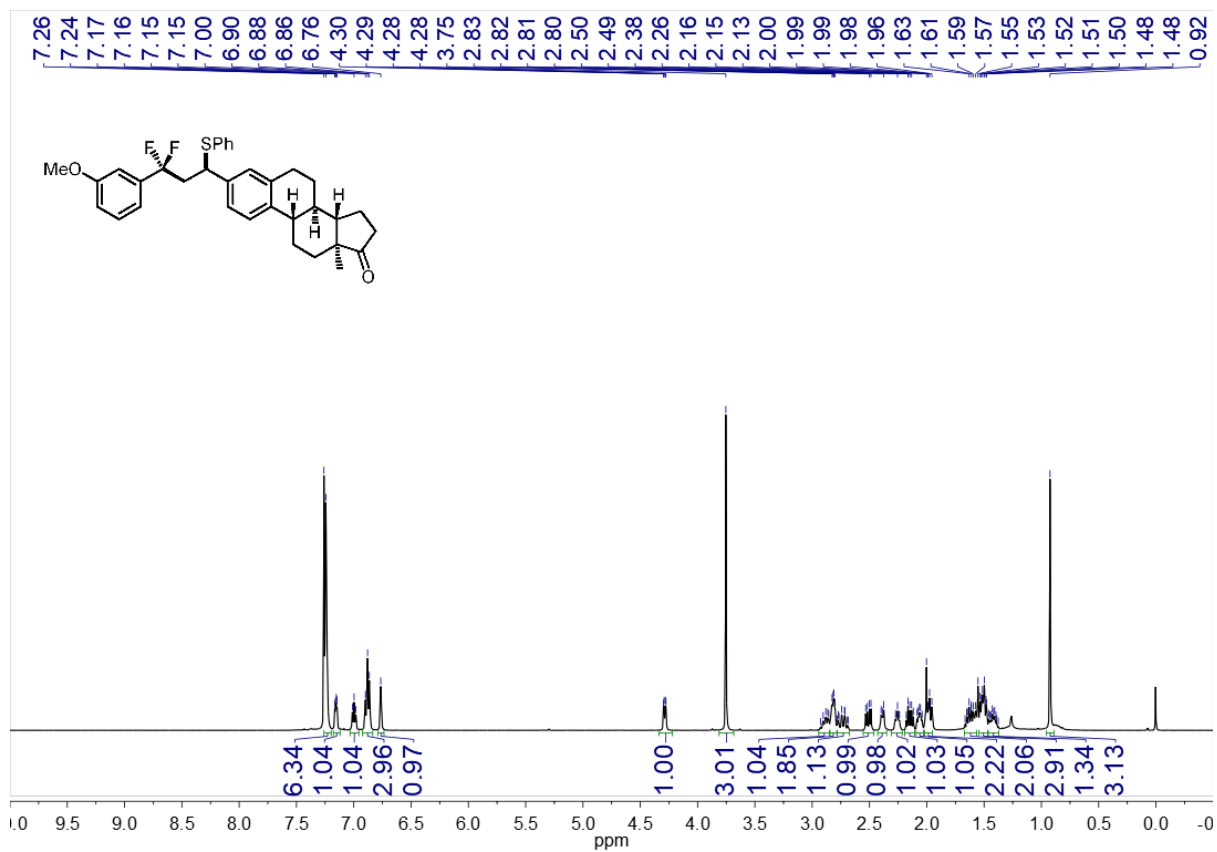

<sup>1</sup>H NMR spectrum (600 MHz, CDCl<sub>3</sub>, 23 °C) of **4j**



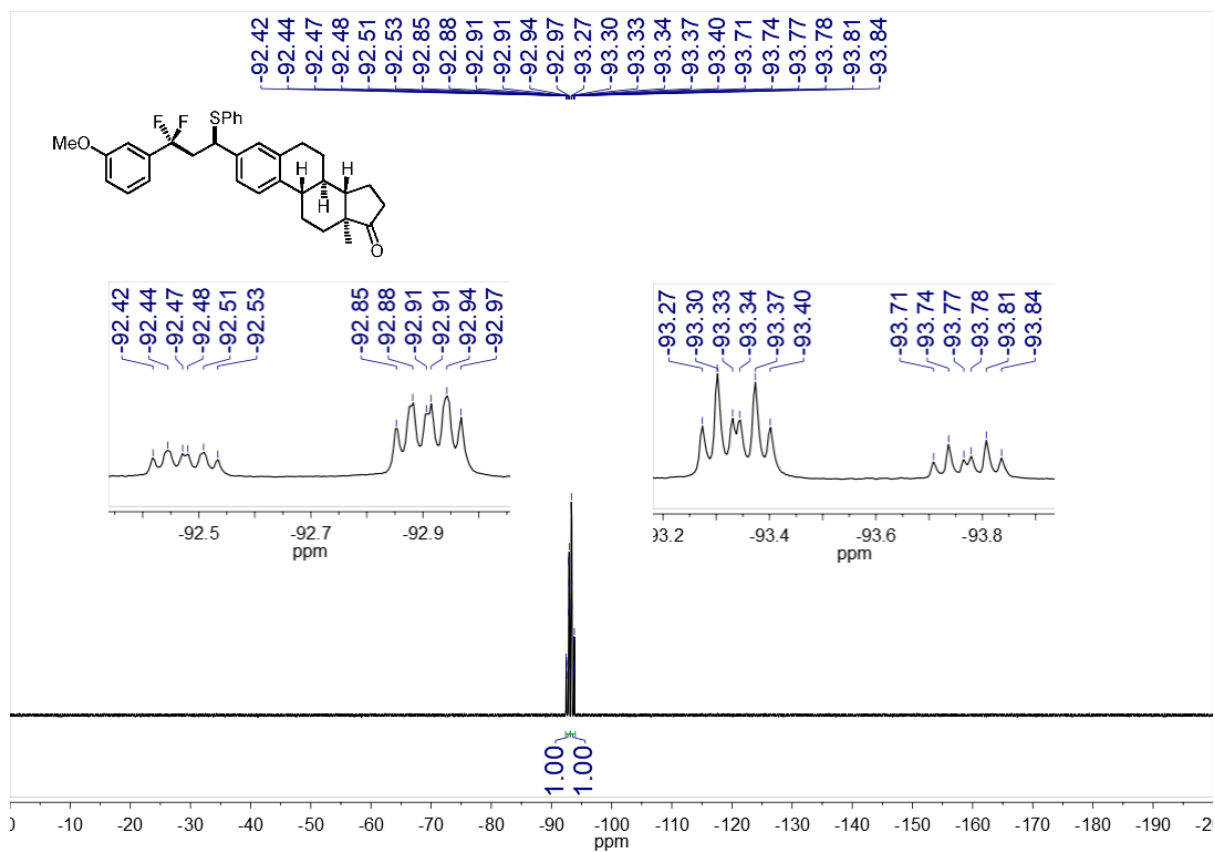

<sup>19</sup>F NMR spectrum (565 MHz, CDCl<sub>3</sub>, 23 °C) of **4j**

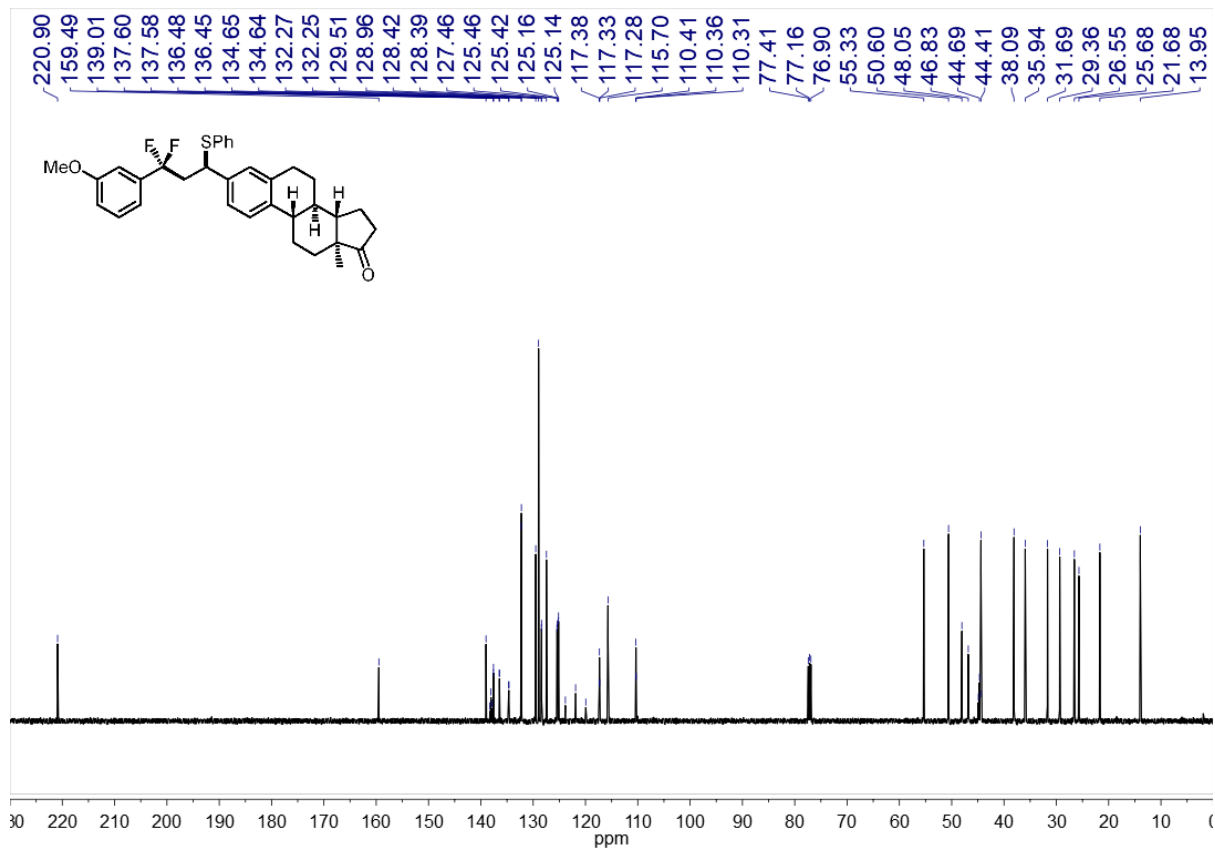

<sup>13</sup>C NMR spectrum (151 MHz, CDCl<sub>3</sub>, 23 °C) of **4j**

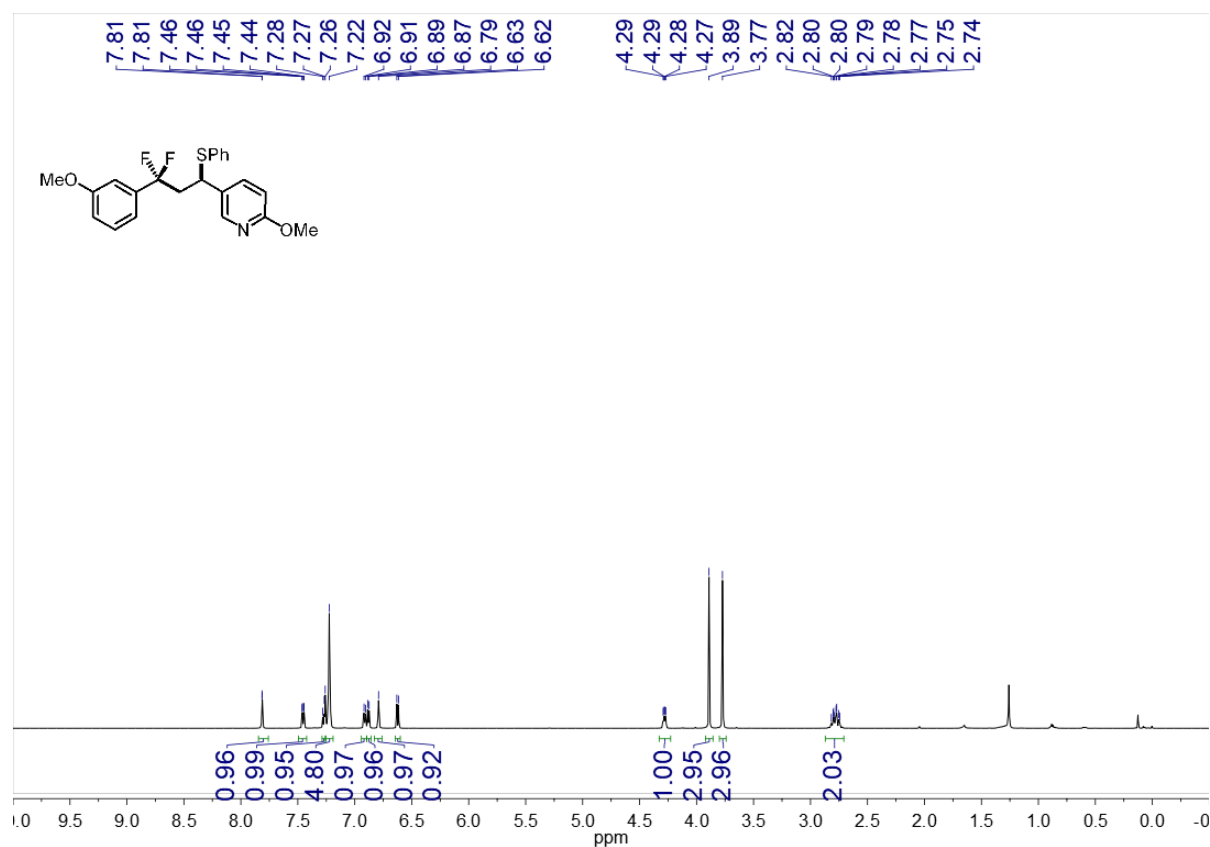

<sup>1</sup>H NMR spectrum (600 MHz, CDCl<sub>3</sub>, 23 °C) of **4k**

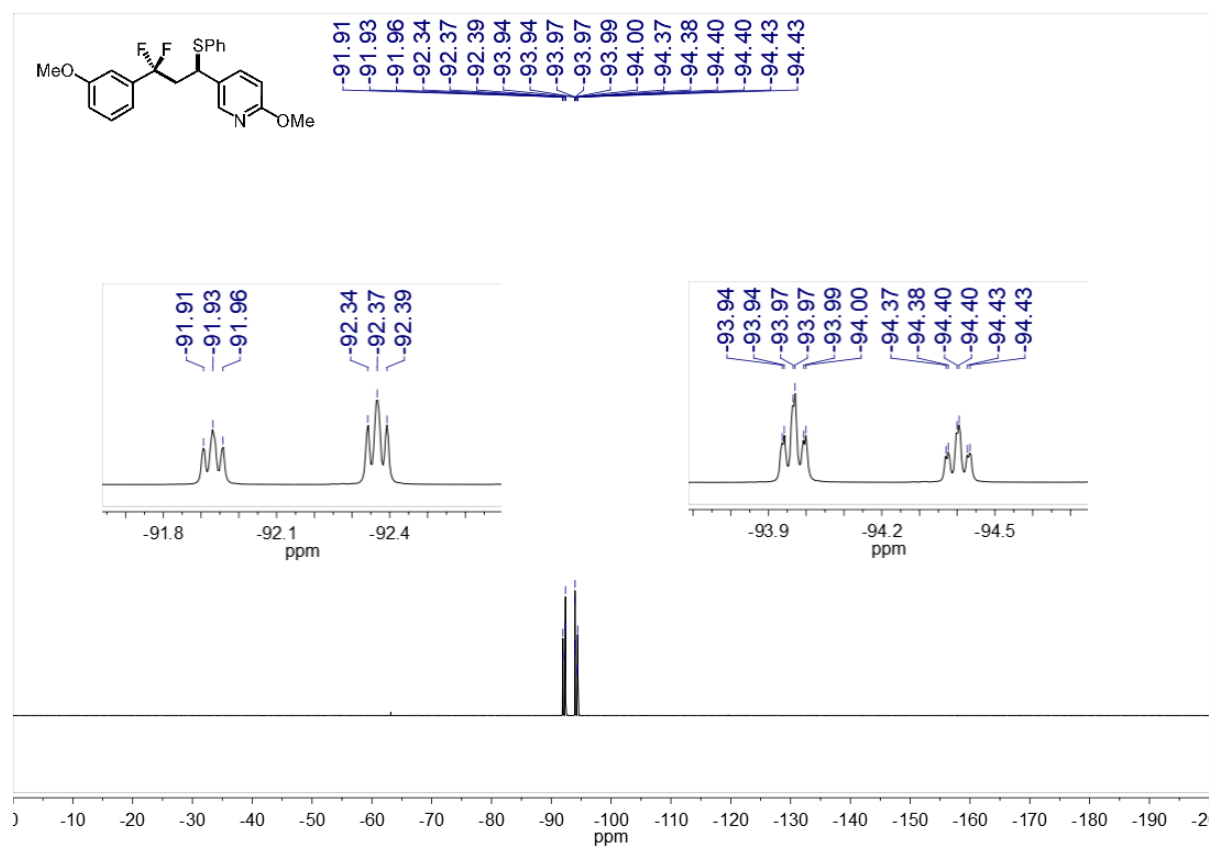

<sup>19</sup>F NMR spectrum (565 MHz, CDCl<sub>3</sub>, 23 °C) of **4k**

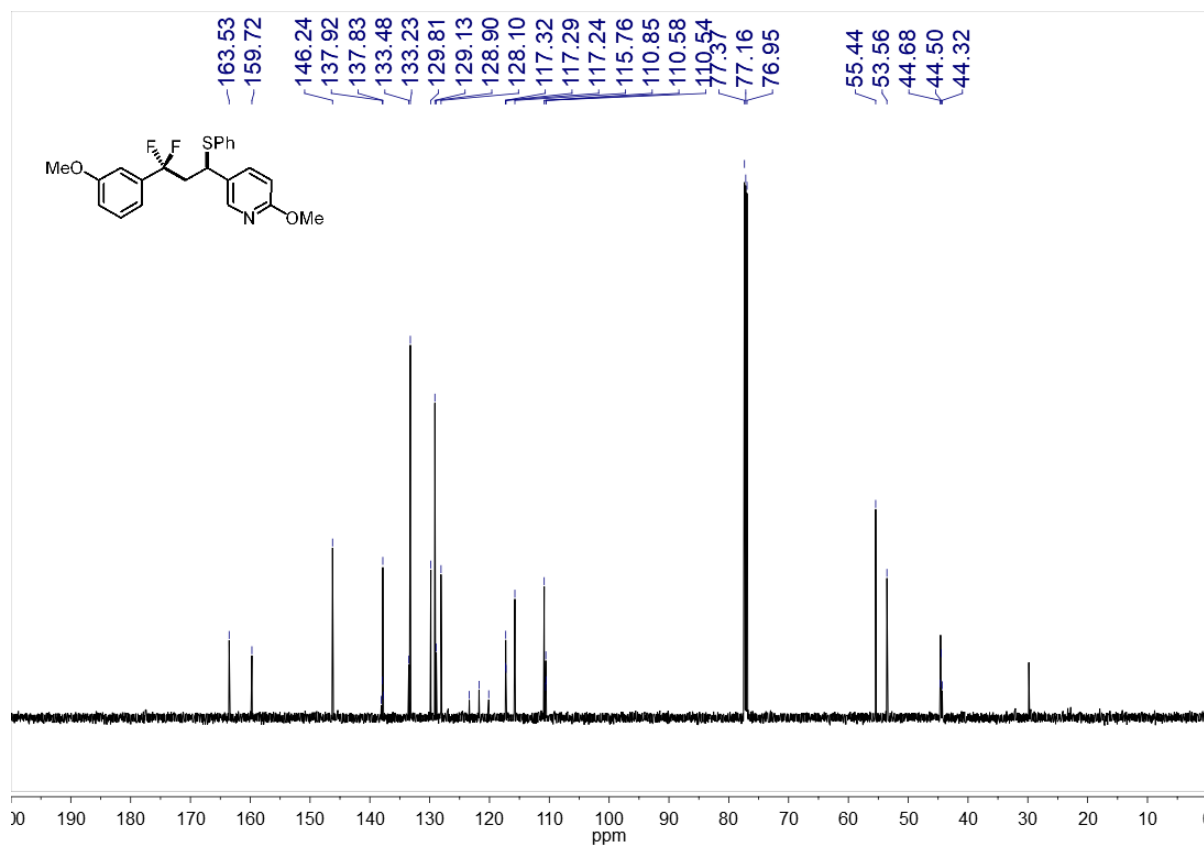

<sup>13</sup>C NMR spectrum (151 MHz, CDCl<sub>3</sub>, 23 °C) of **4k**

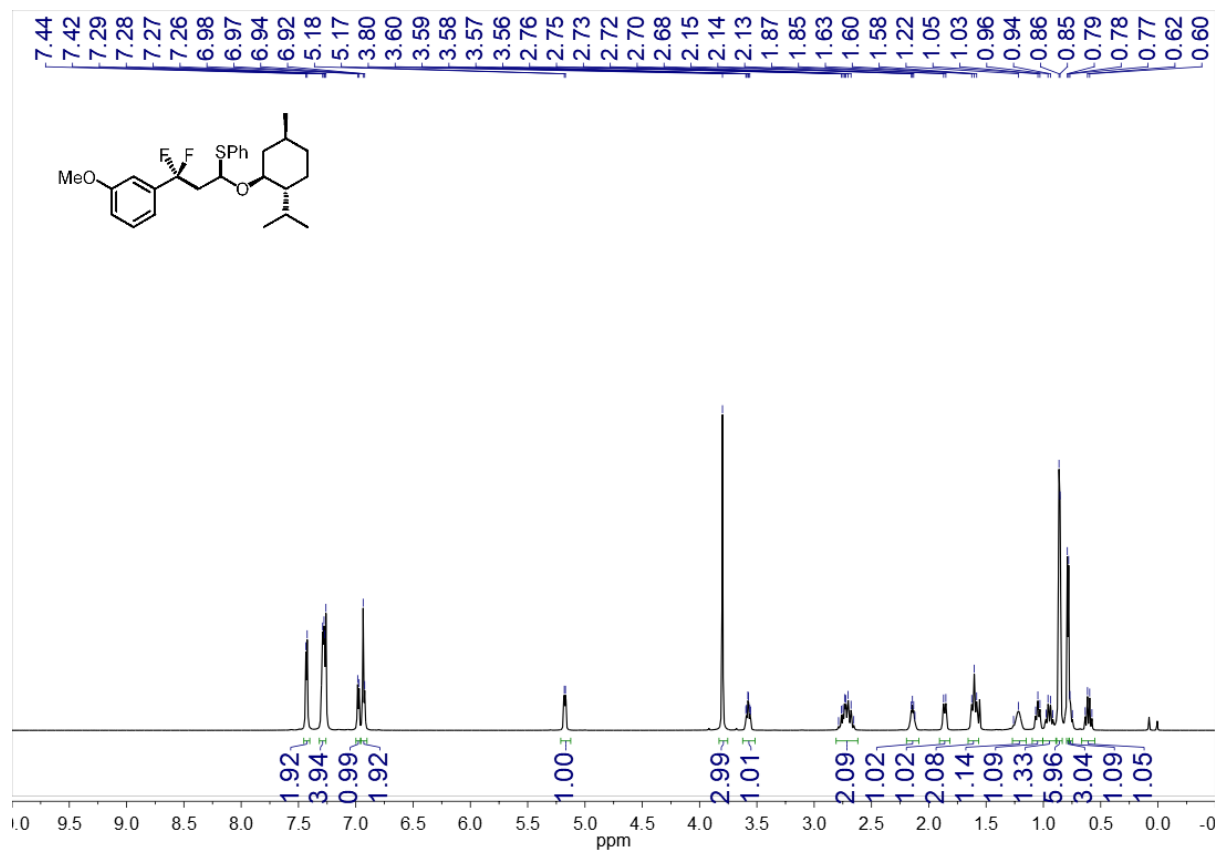

<sup>1</sup>H NMR spectrum (600 MHz, CDCl<sub>3</sub>, 23 °C) of **4l**

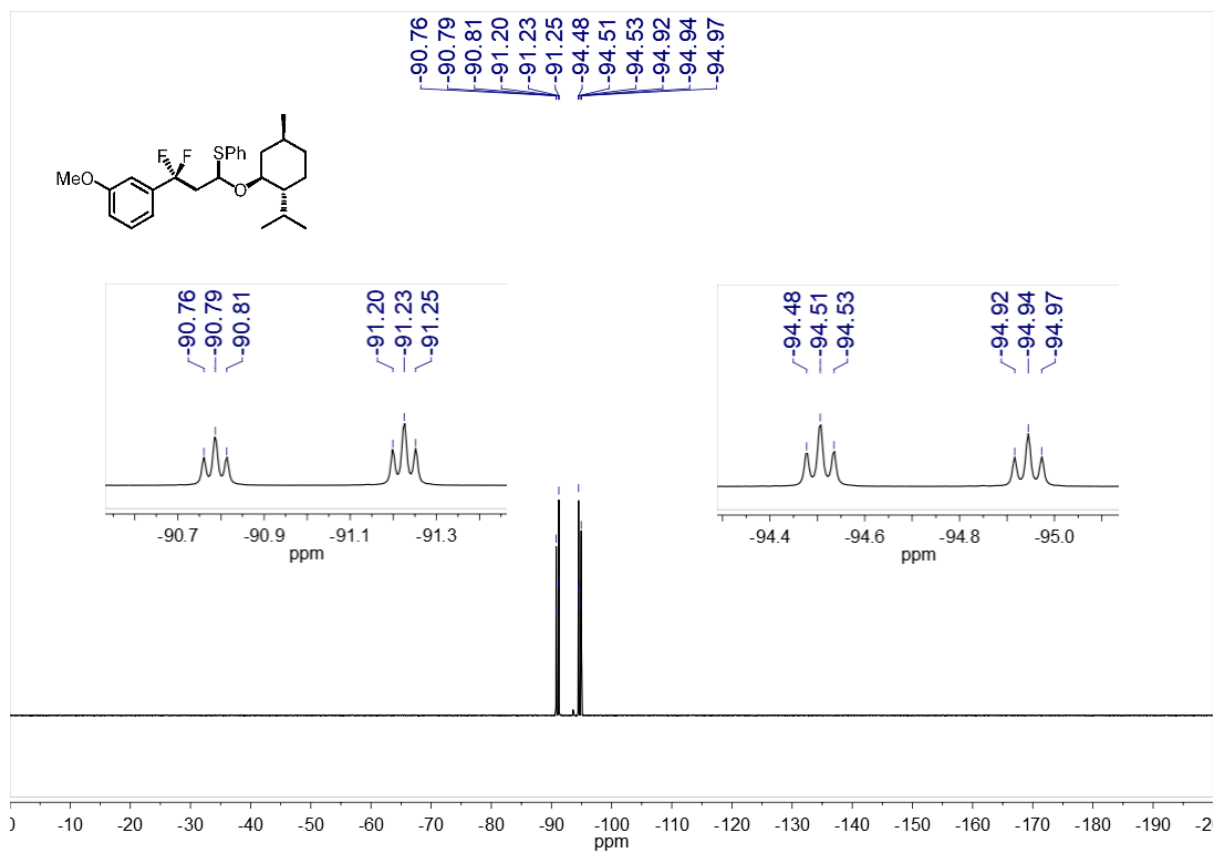

<sup>19</sup>F NMR spectrum (565 MHz, CDCl<sub>3</sub>, 23 °C) of **4I**

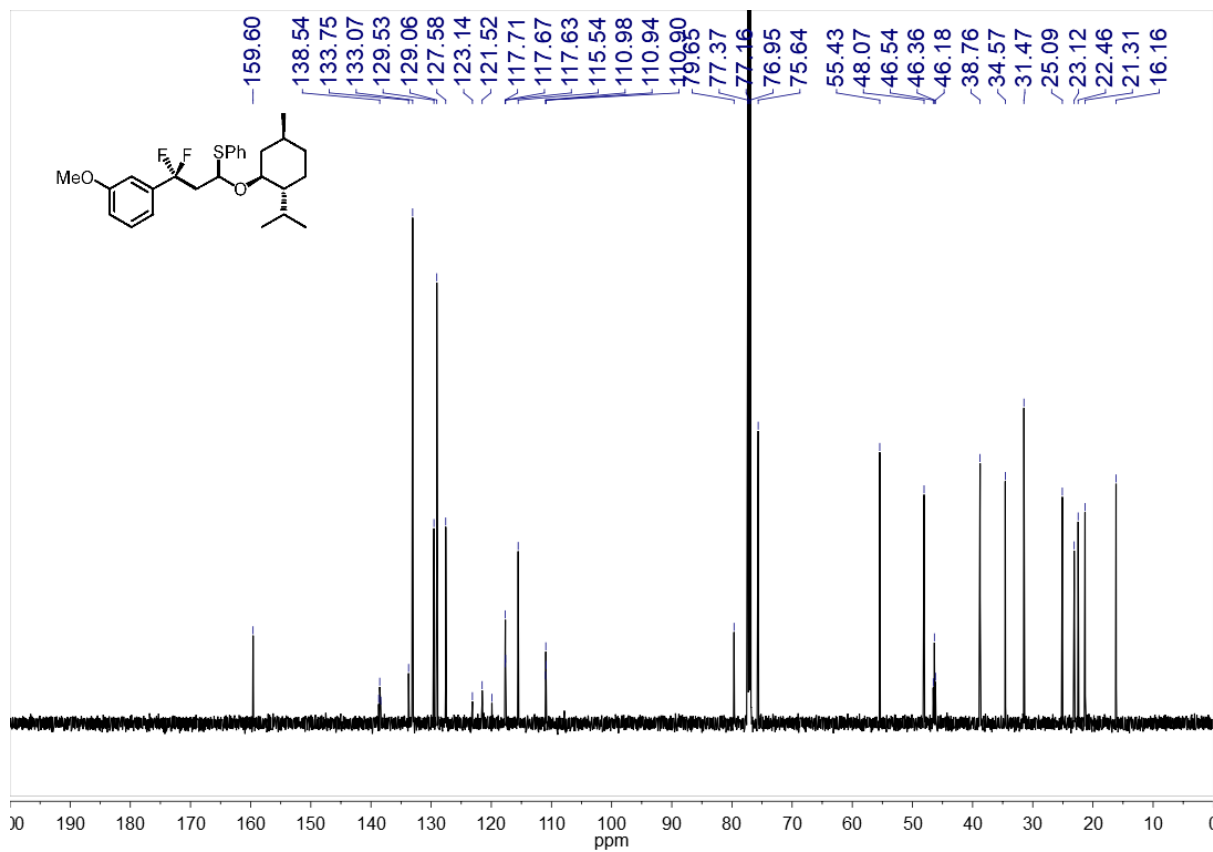

<sup>13</sup>C NMR spectrum (151 MHz, CDCl<sub>3</sub>, 23 °C) of **4I**

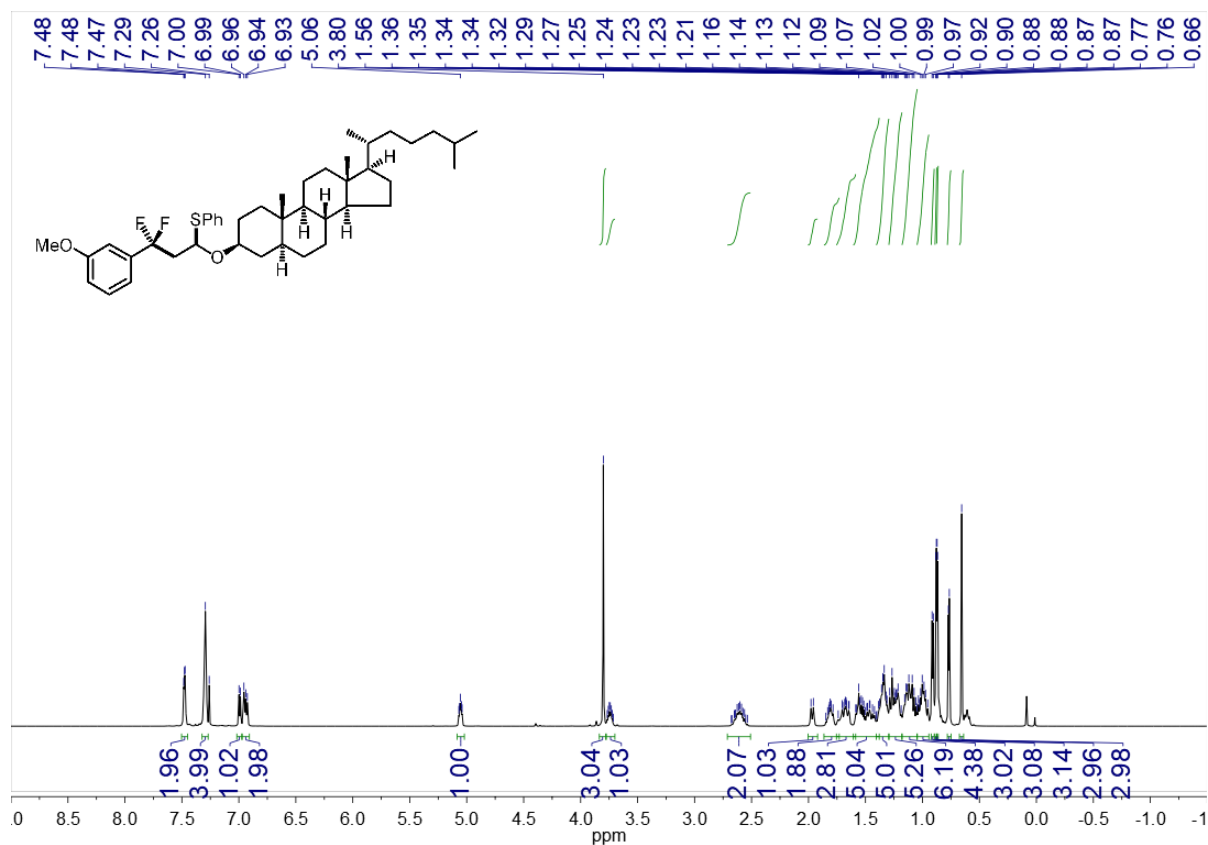

<sup>1</sup>H NMR spectrum (600 MHz, CDCl<sub>3</sub>, 23 °C) of **4m**

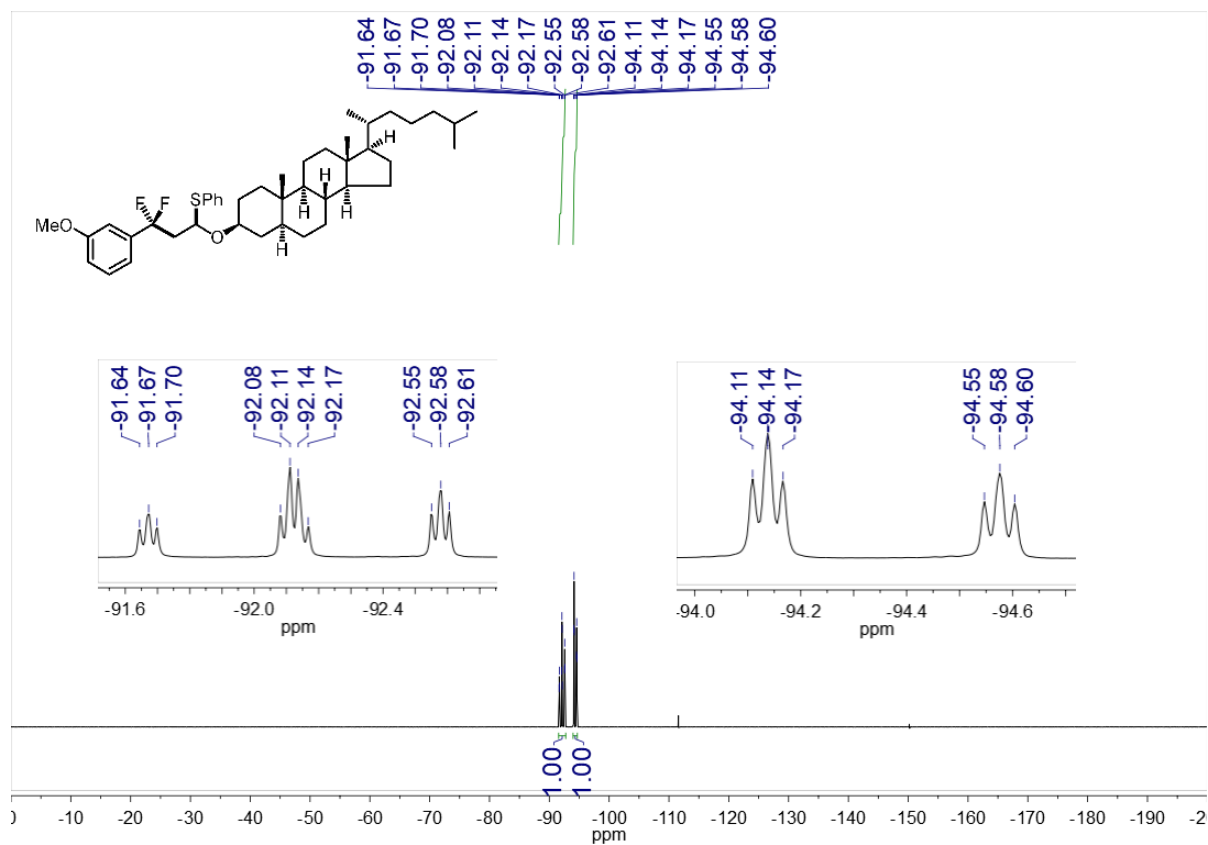

<sup>19</sup>F NMR spectrum (565 MHz, CDCl<sub>3</sub>, 23 °C) of **4m**

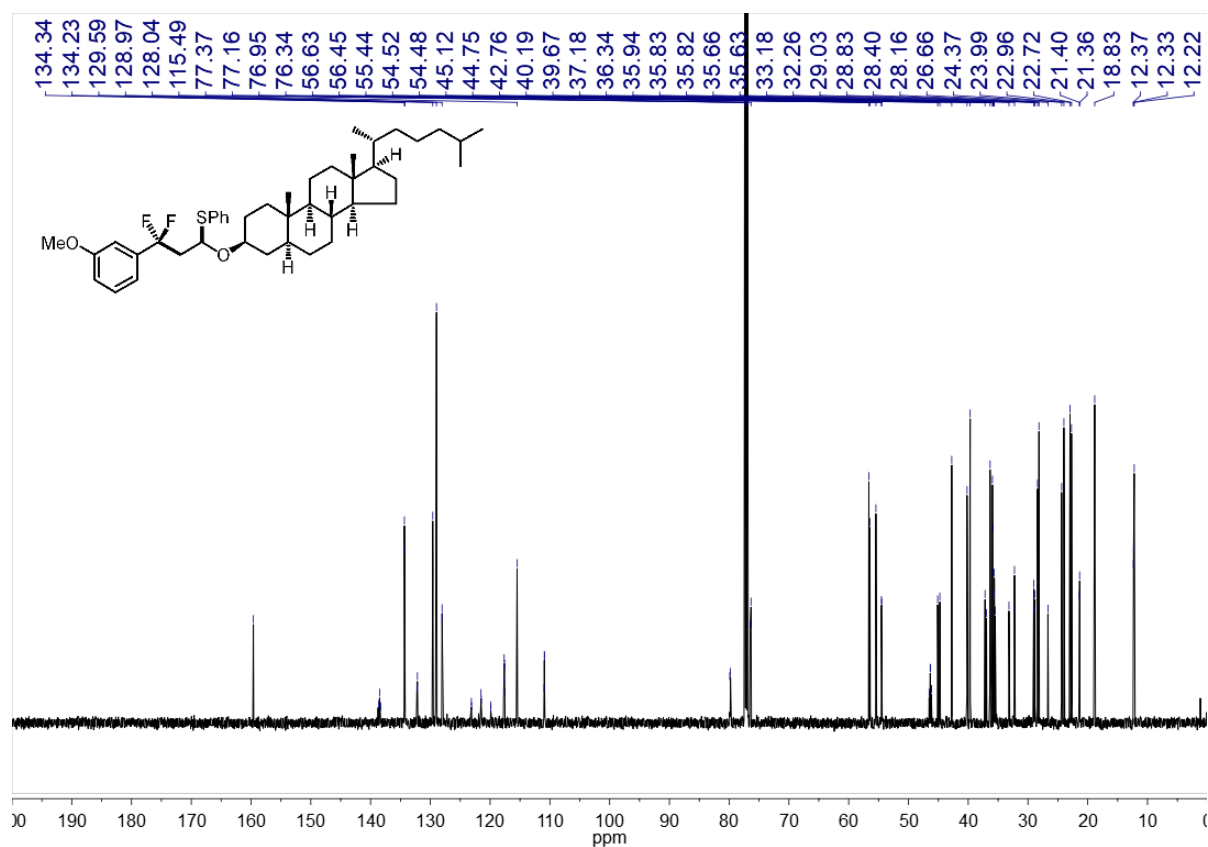

$^{13}\text{C}$  NMR spectrum (151 MHz,  $\text{CDCl}_3$ , 23 °C) of **4m**

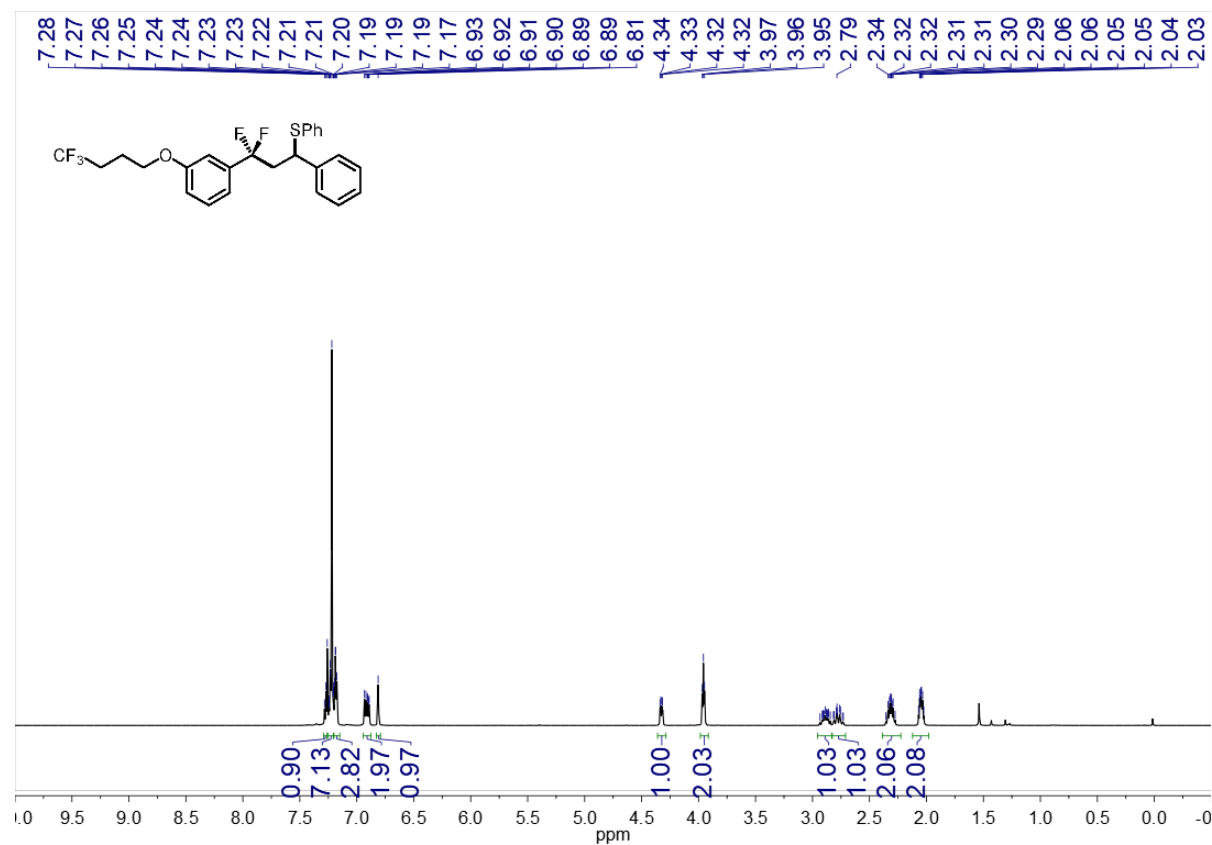

$^1\text{H}$  NMR spectrum (600 MHz,  $\text{CDCl}_3$ , 23 °C) of **4n**

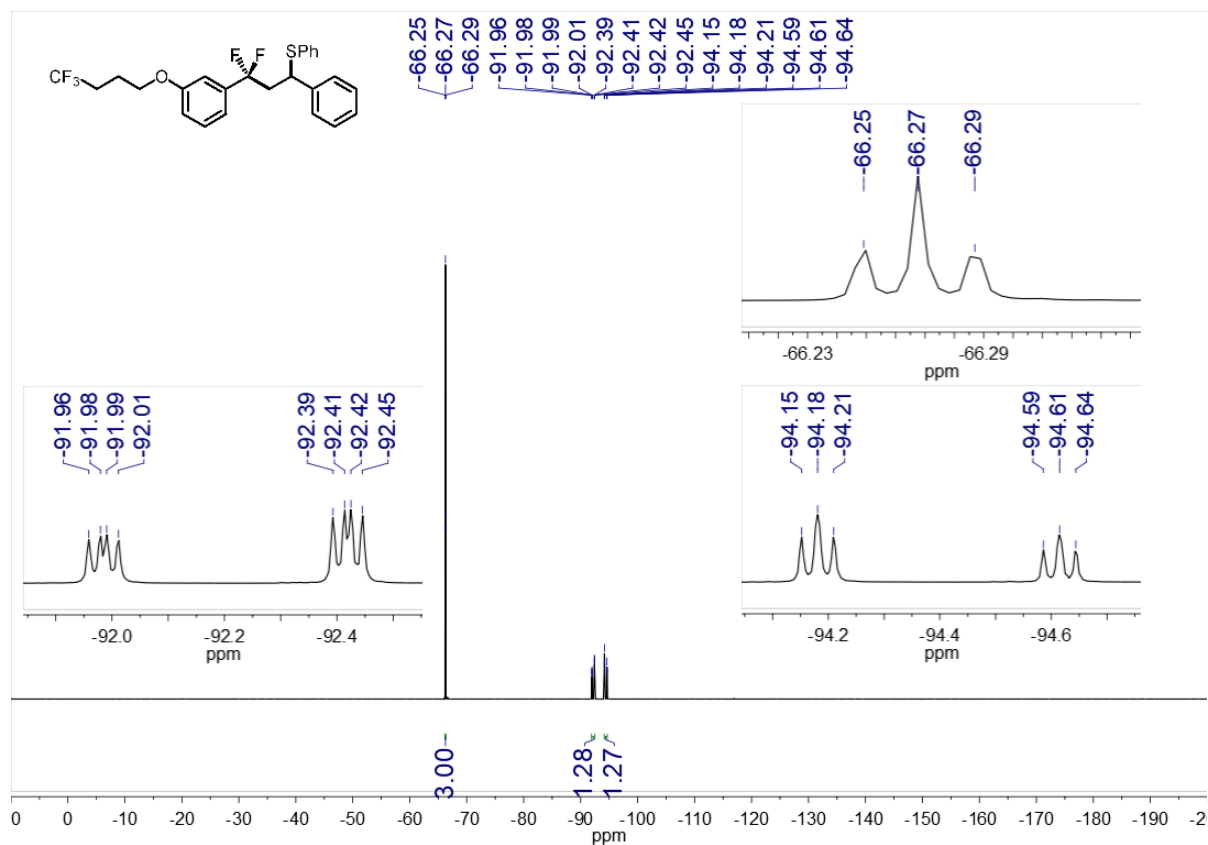

<sup>19</sup>F NMR spectrum (565 MHz, CDCl<sub>3</sub>, 23 °C) of **4n**

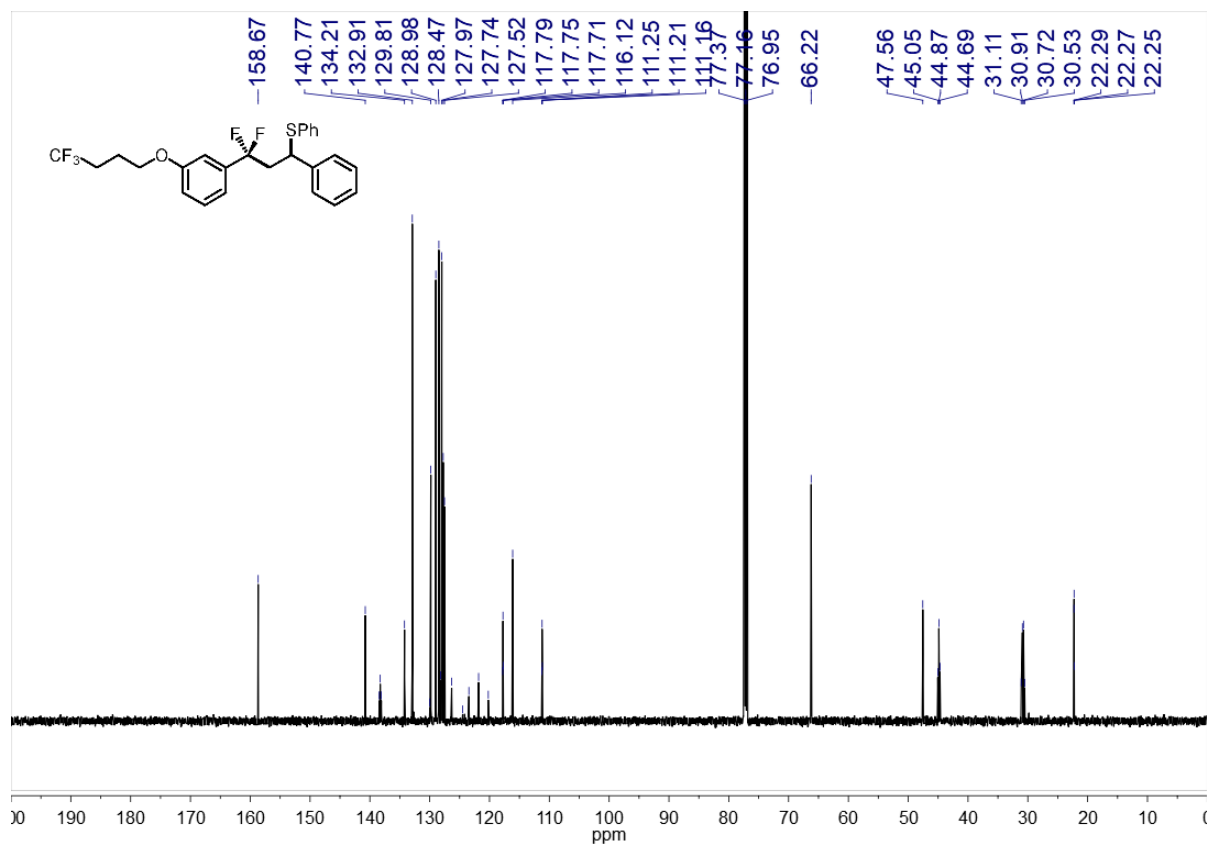

<sup>13</sup>C NMR spectrum (151 MHz, CDCl<sub>3</sub>, 23 °C) of **4n**

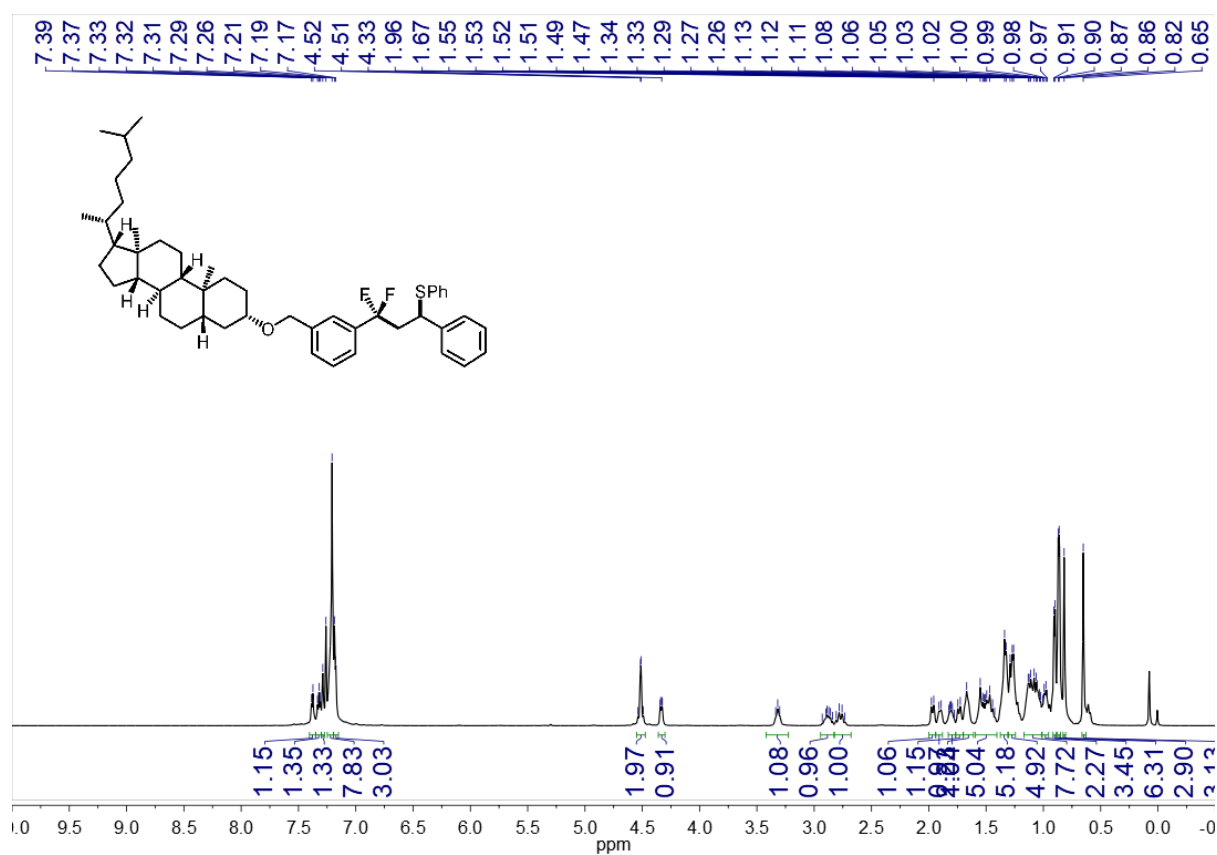

**<sup>1</sup>H NMR spectrum (600 MHz, CDCl<sub>3</sub>, 23 °C) of **4o****

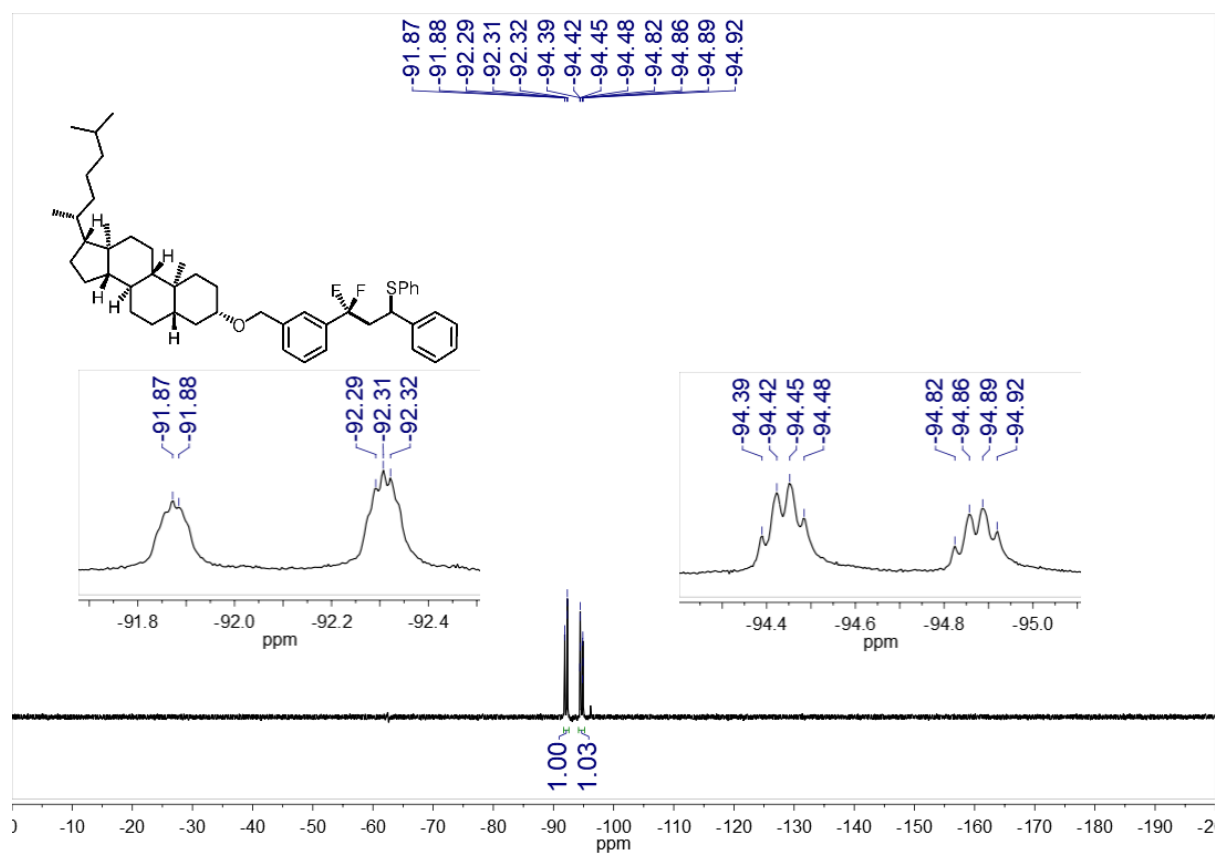

**<sup>19</sup>F NMR spectrum (565 MHz, CDCl<sub>3</sub>, 23 °C) of **4o****



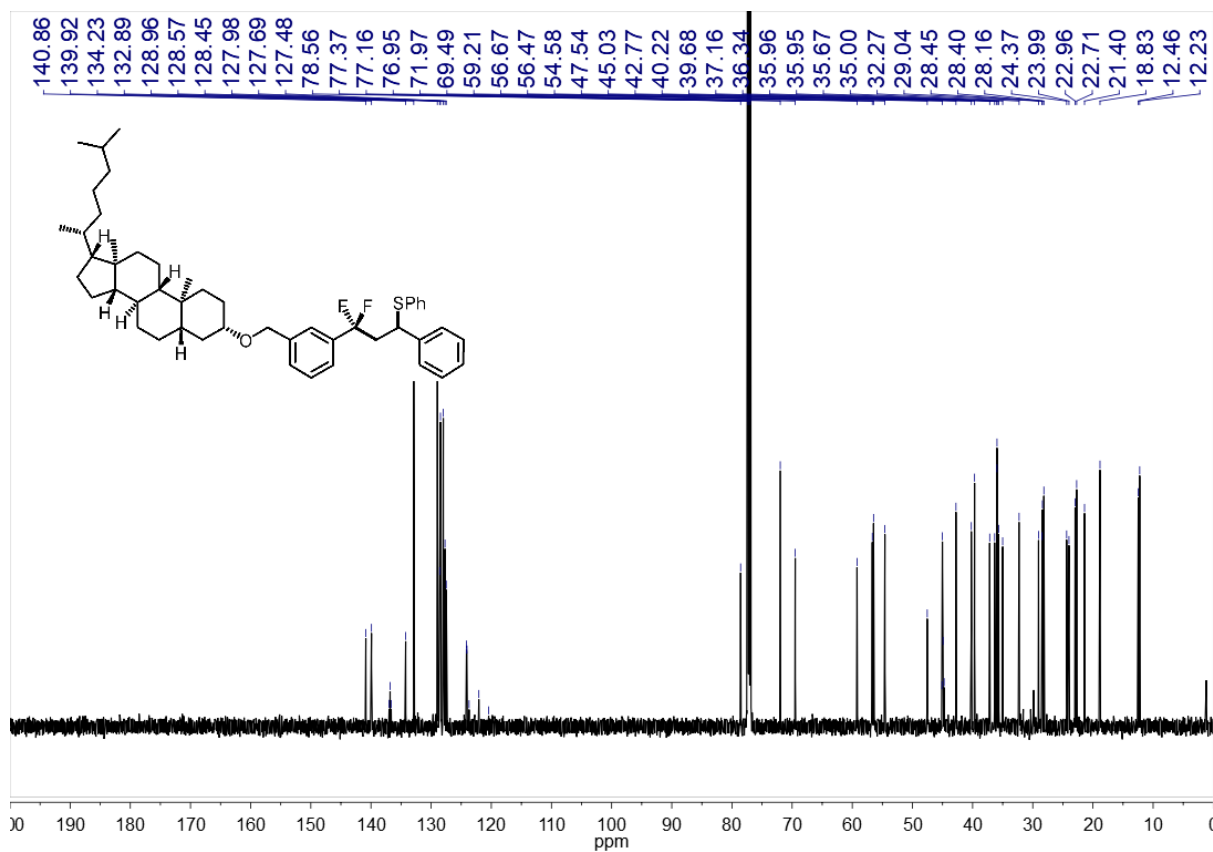

<sup>13</sup>C NMR spectrum (151 MHz, CDCl<sub>3</sub>, 23 °C) of **4o**

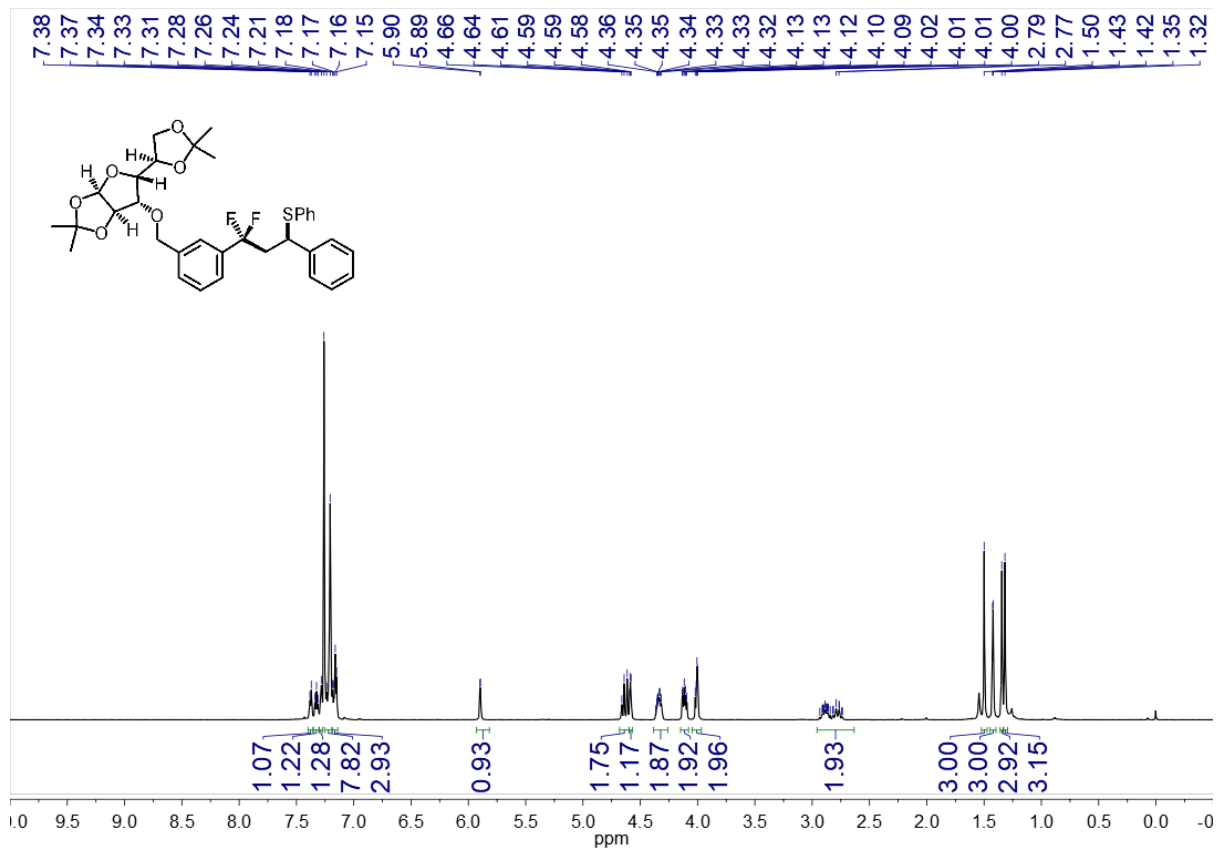

<sup>1</sup>H NMR spectrum (600 MHz, CDCl<sub>3</sub>, 23 °C) of **4p**

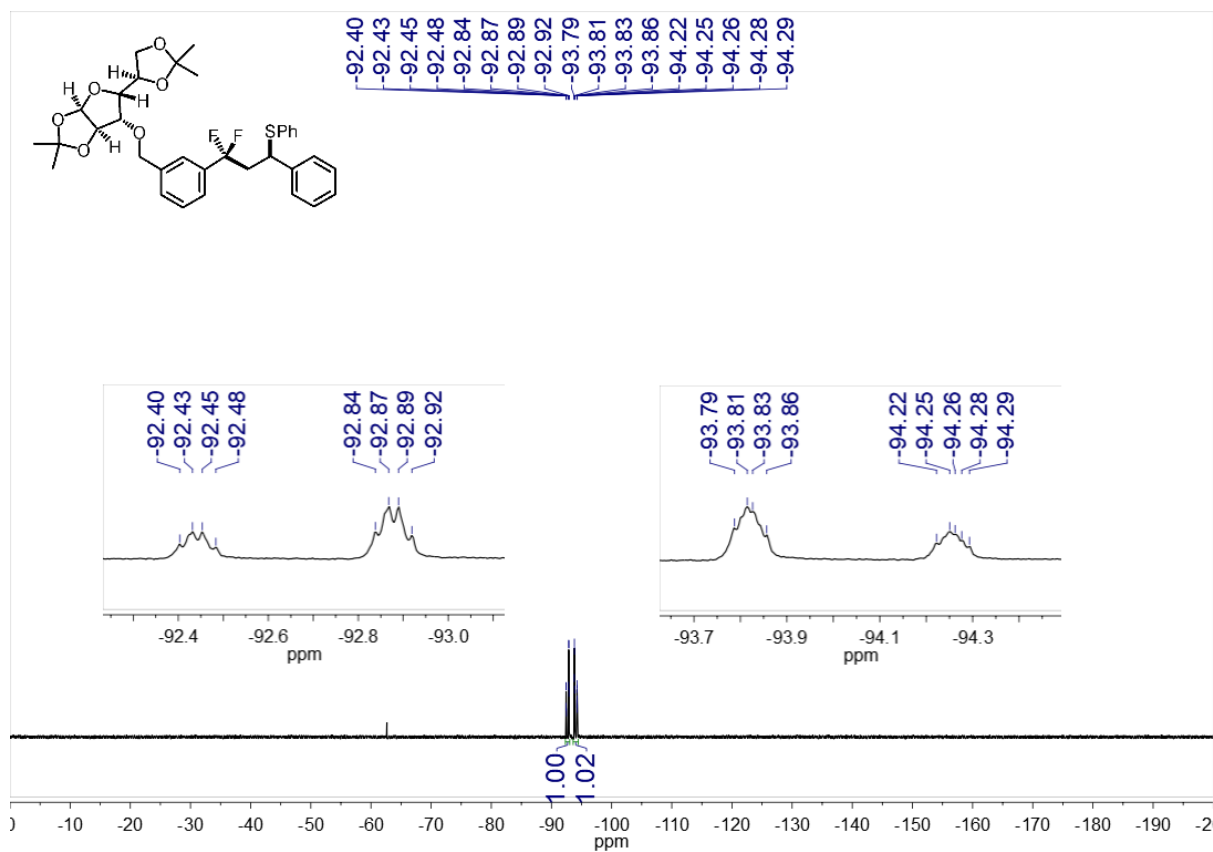

$^{19}\text{F}$  NMR spectrum (565 MHz,  $\text{CDCl}_3$ , 23  $^\circ\text{C}$ ) of **4p**

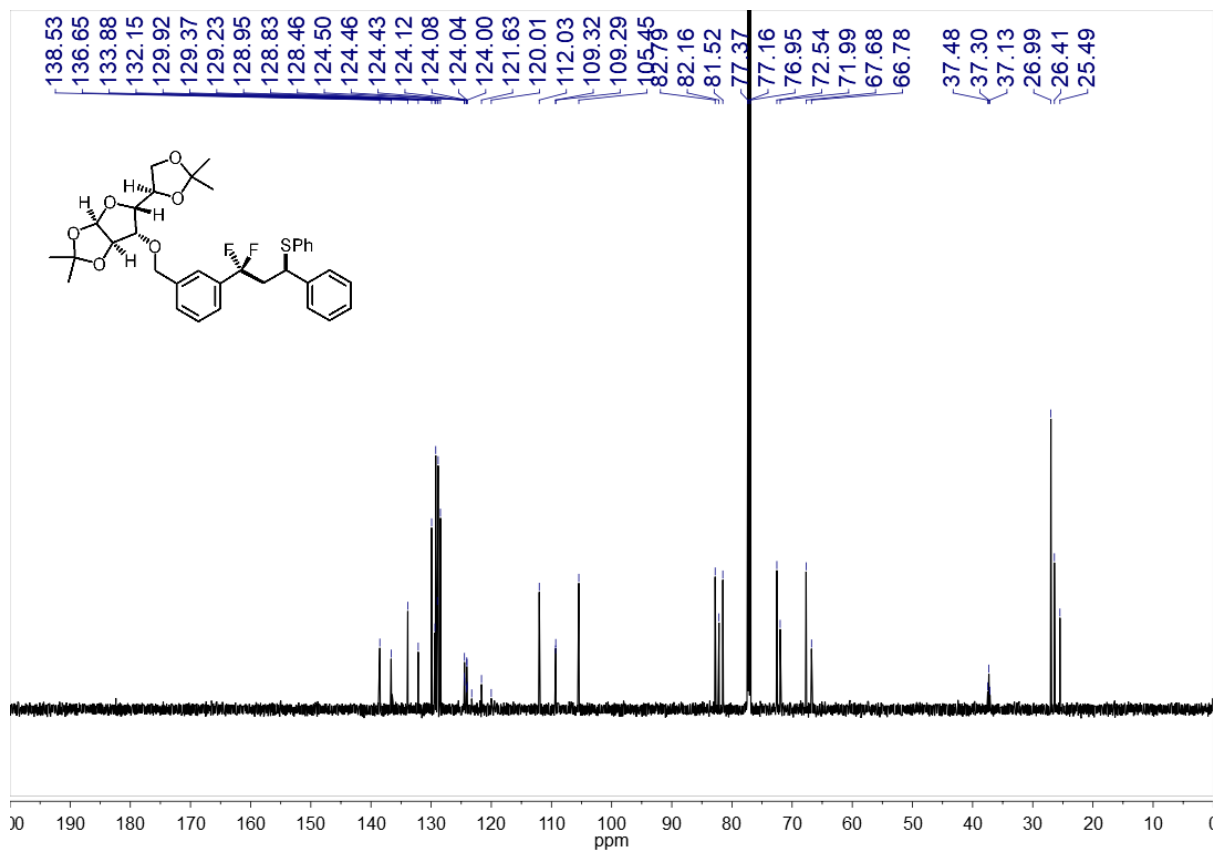

$^{13}\text{C}$  NMR spectrum (151 MHz,  $\text{CDCl}_3$ , 23  $^\circ\text{C}$ ) of **4p**

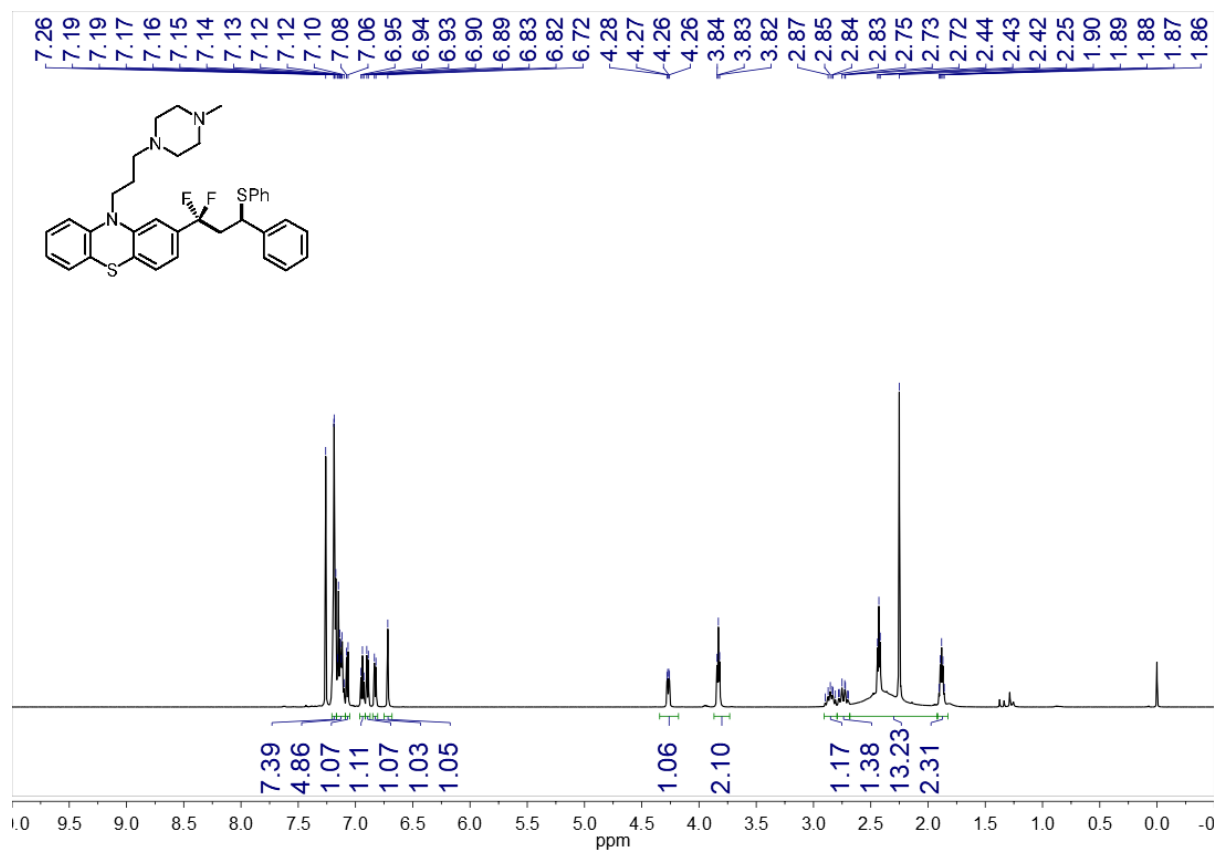

<sup>1</sup>H NMR spectrum (600 MHz, CDCl<sub>3</sub>, 23 °C) of **4q**

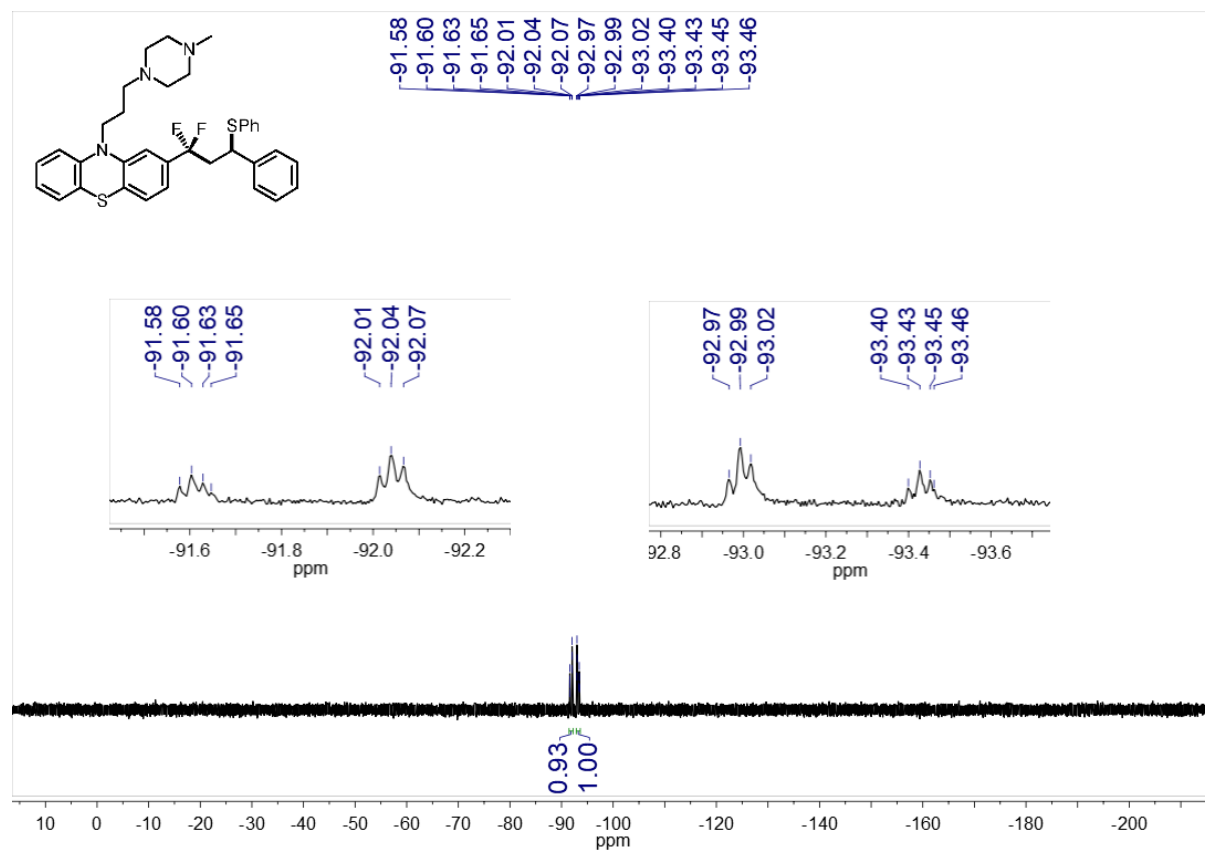

<sup>19</sup>F NMR spectrum (565 MHz, CDCl<sub>3</sub>, 23 °C) of **4q**

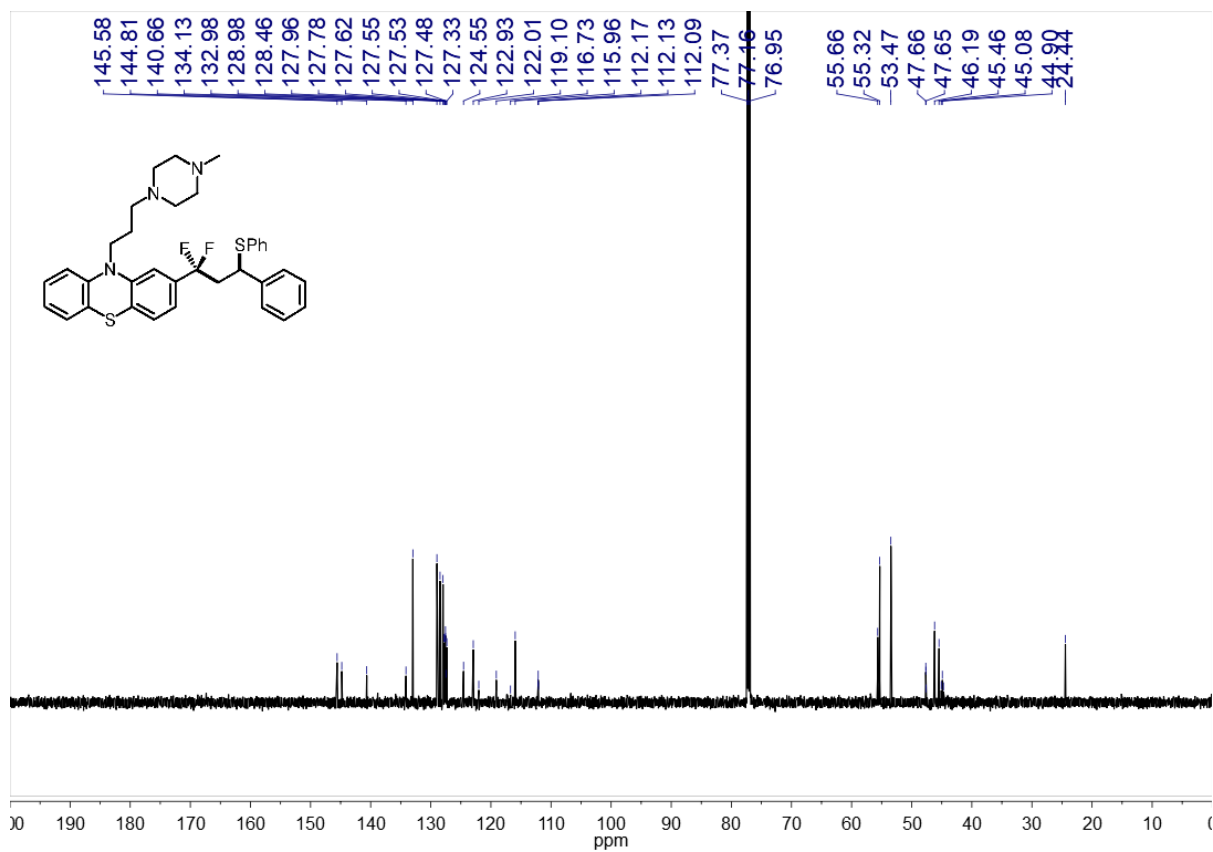

<sup>13</sup>C NMR spectrum (151 MHz, CDCl<sub>3</sub>, 23 °C) of **4q**

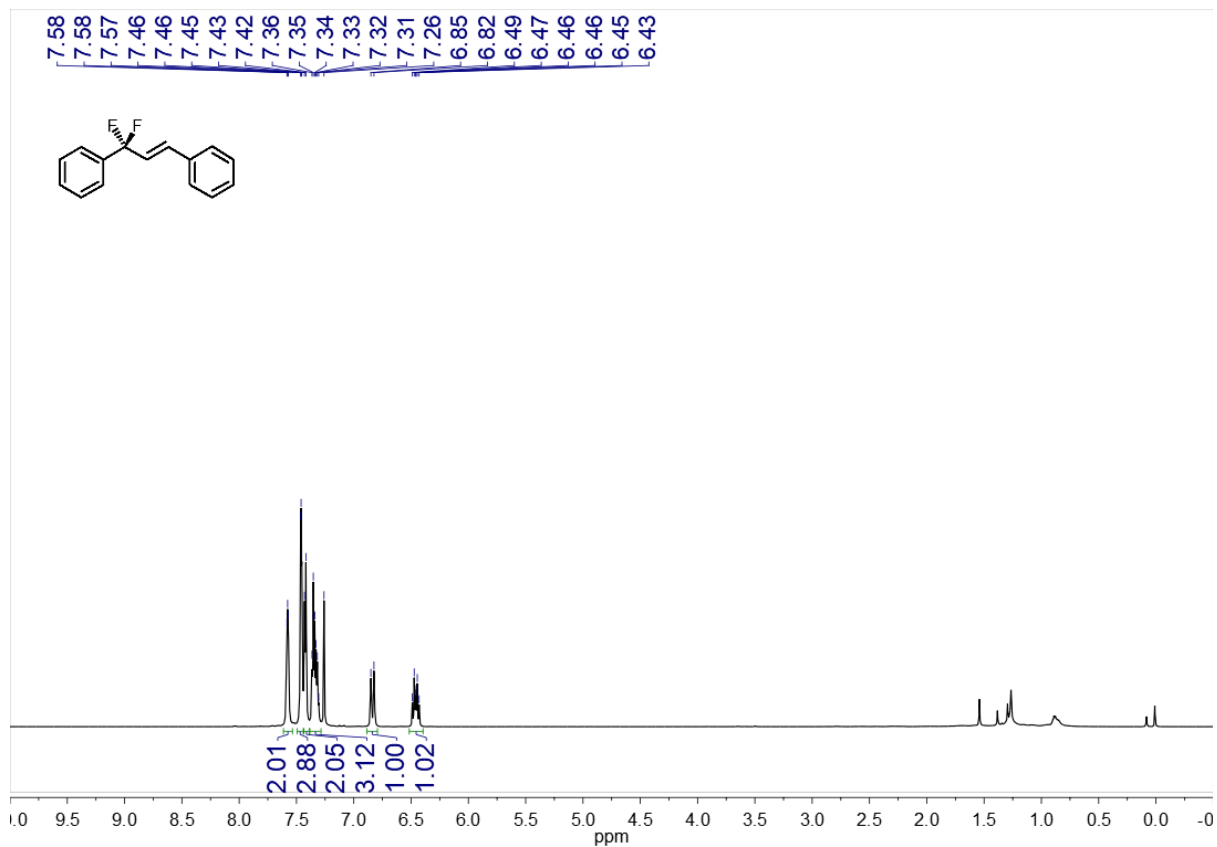

<sup>1</sup>H NMR spectrum (600 MHz, CDCl<sub>3</sub>, 23 °C) of **6**

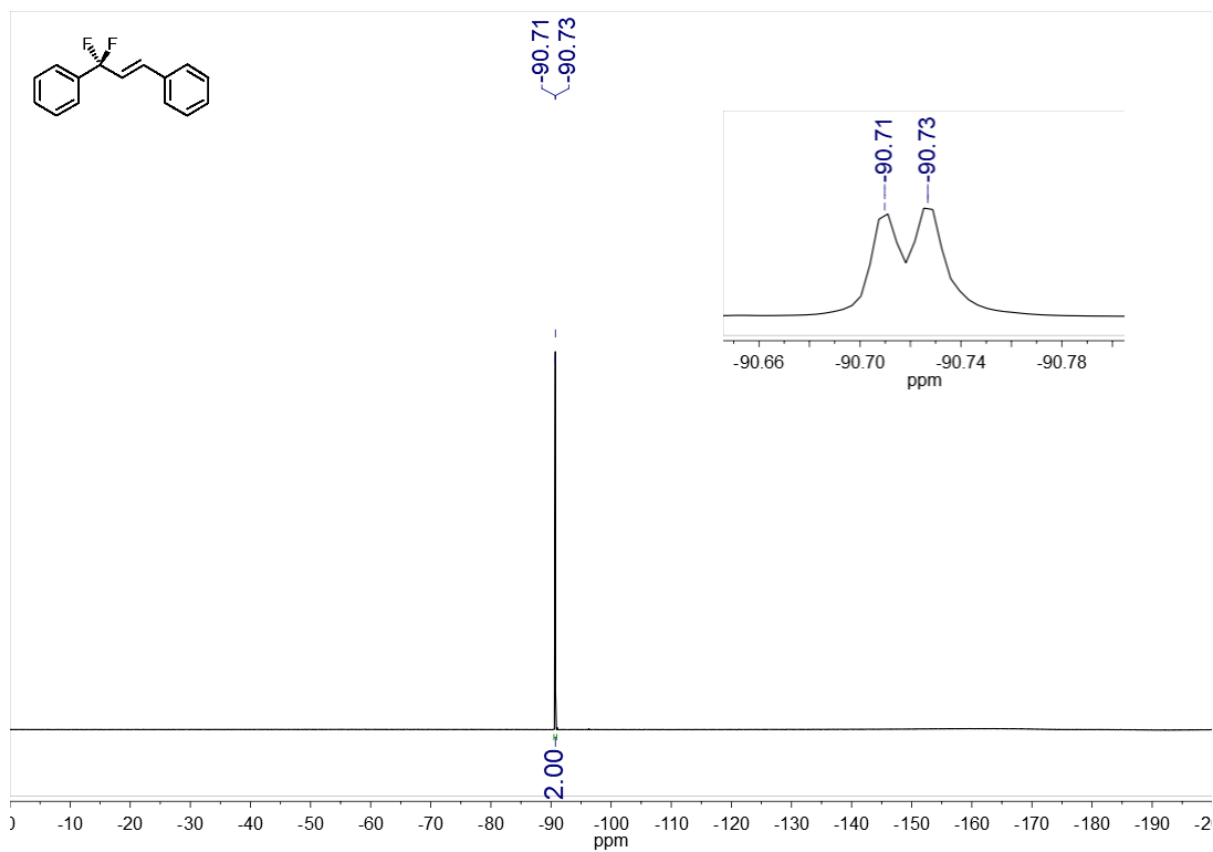

$^{19}\text{F}$  NMR spectrum (565 MHz,  $\text{CDCl}_3$ , 23  $^\circ\text{C}$ ) of **6**

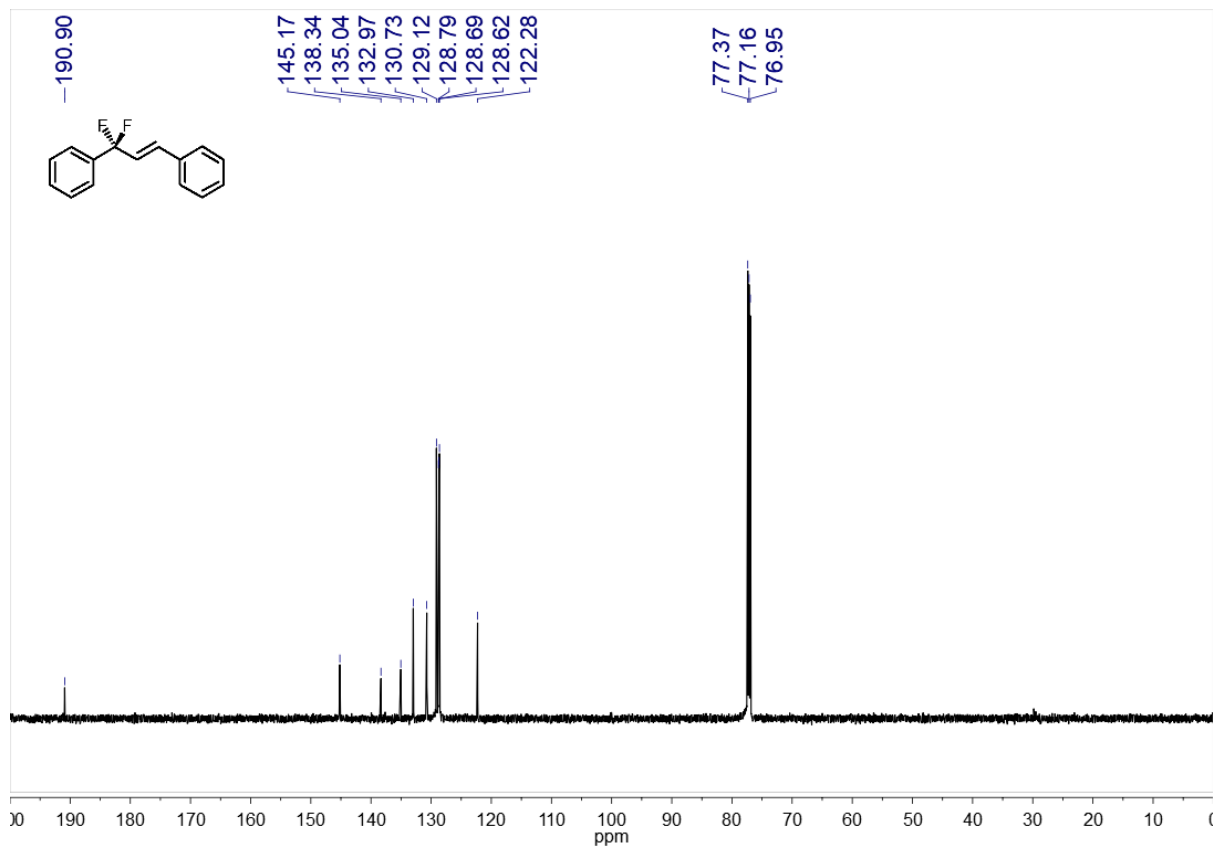

$^{13}\text{C}$  NMR spectrum (151 MHz,  $\text{CDCl}_3$ , 23  $^\circ\text{C}$ ) of **6**

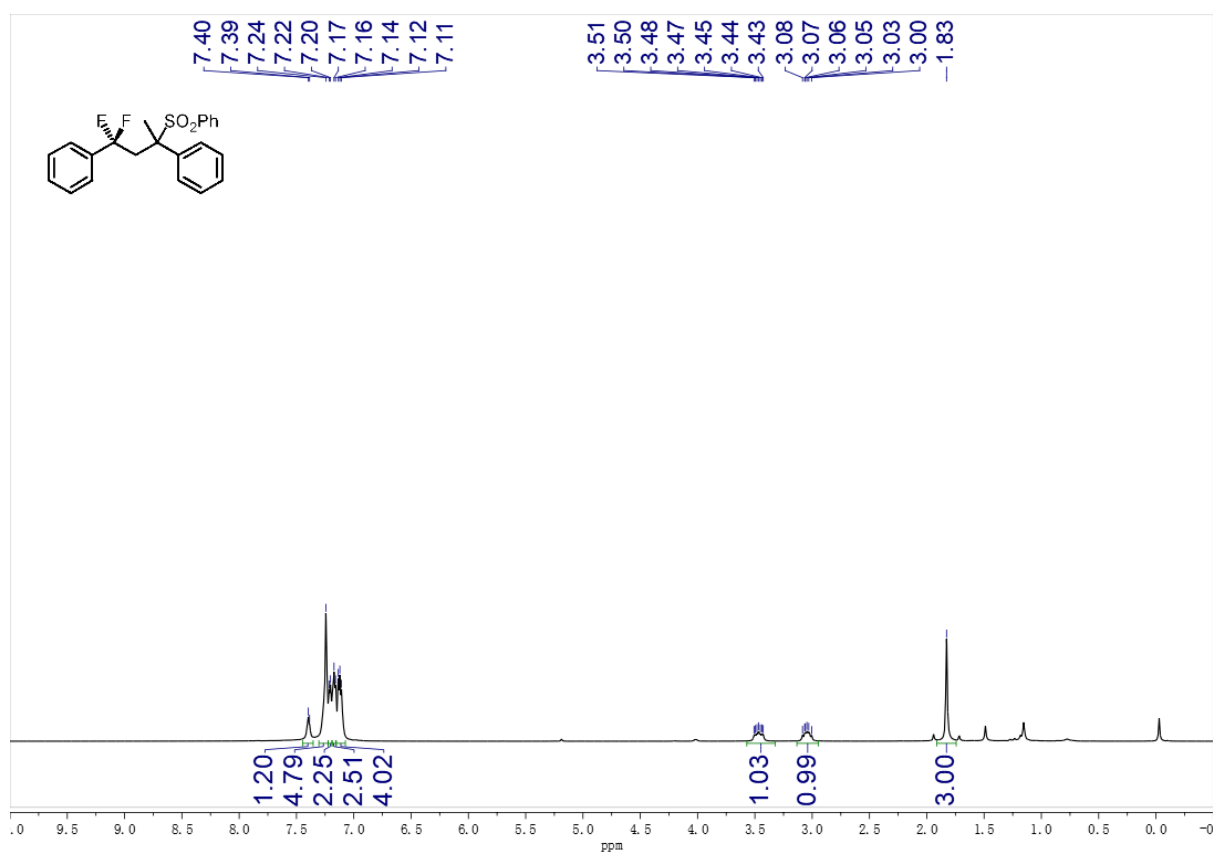

<sup>1</sup>H NMR spectrum (600 MHz, CDCl<sub>3</sub>, 23 °C) of 7

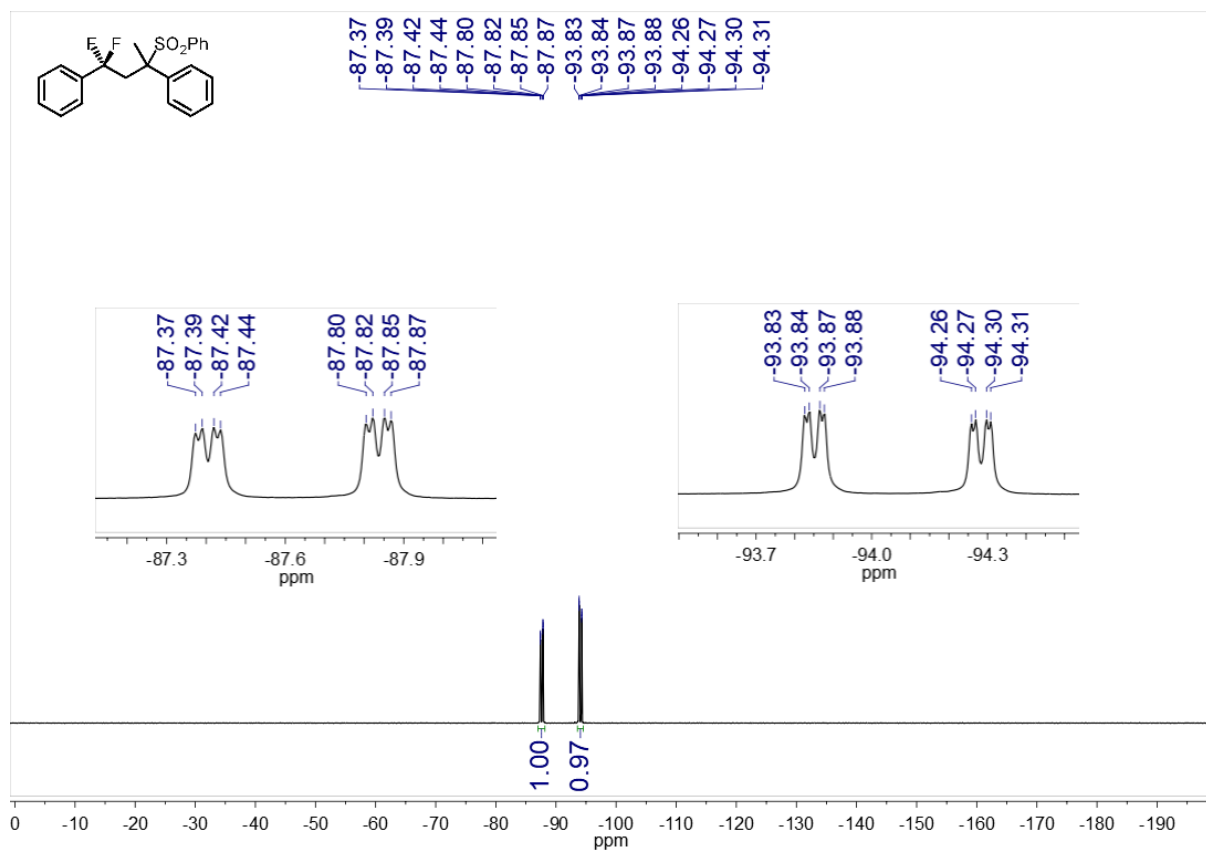

<sup>19</sup>F NMR spectrum (565 MHz, CDCl<sub>3</sub>, 23 °C) of 7

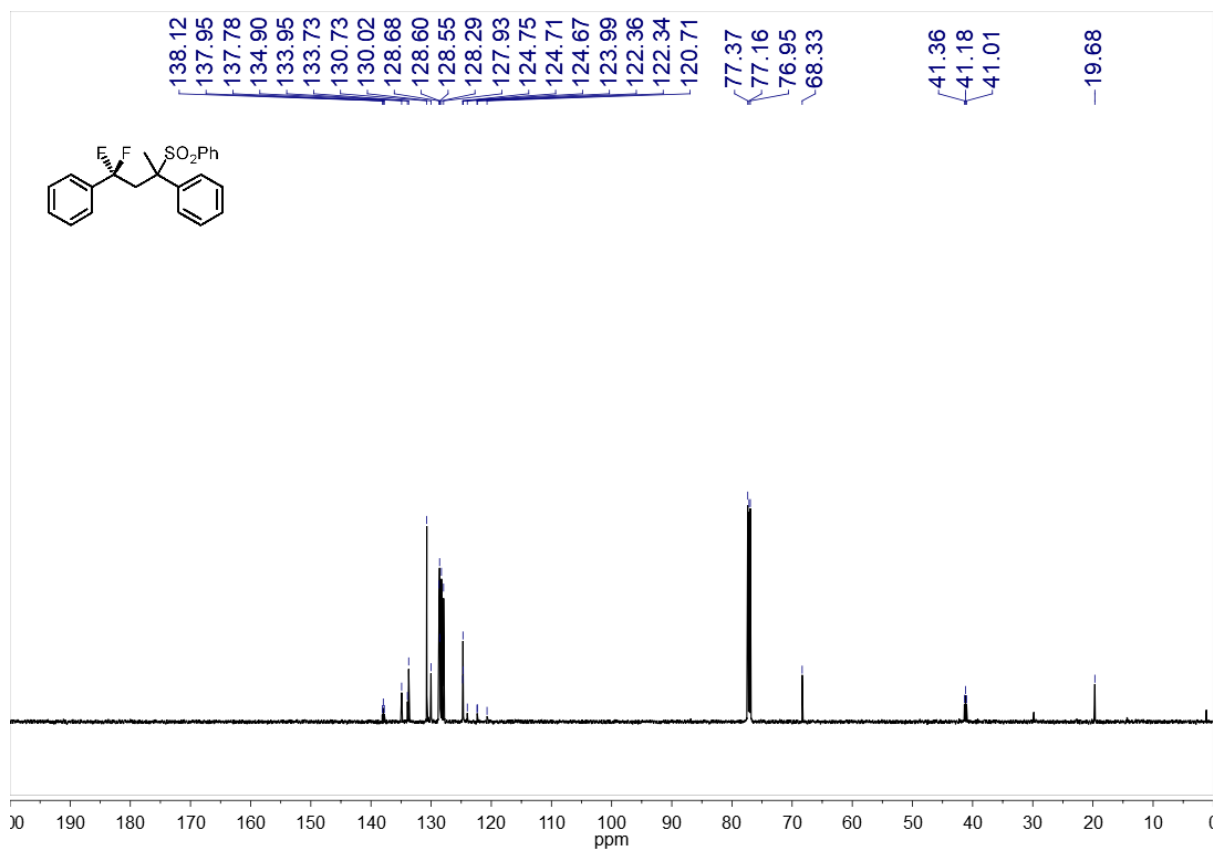

<sup>13</sup>C NMR spectrum (151 MHz, CDCl<sub>3</sub>, 23 °C) of **7**

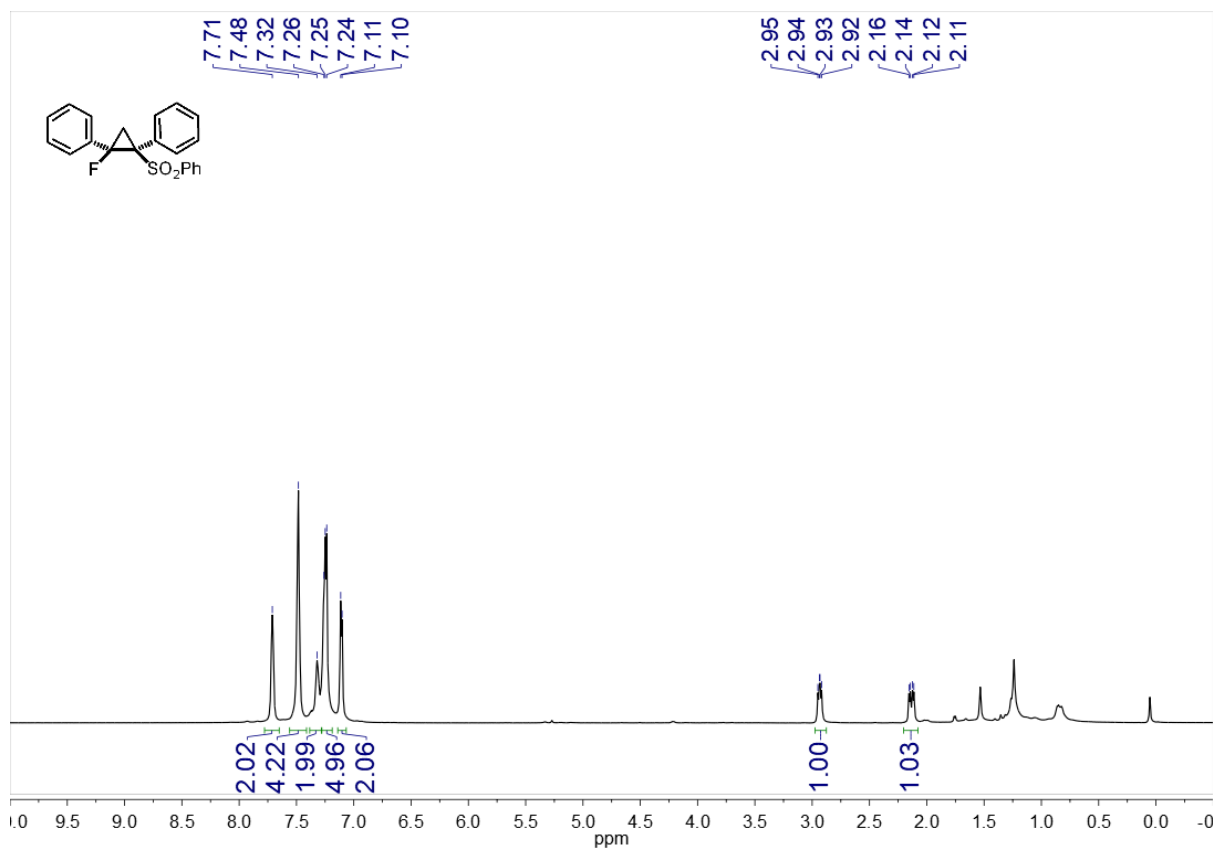

<sup>1</sup>H NMR spectrum (600 MHz, CDCl<sub>3</sub>, 23 °C) of **8**

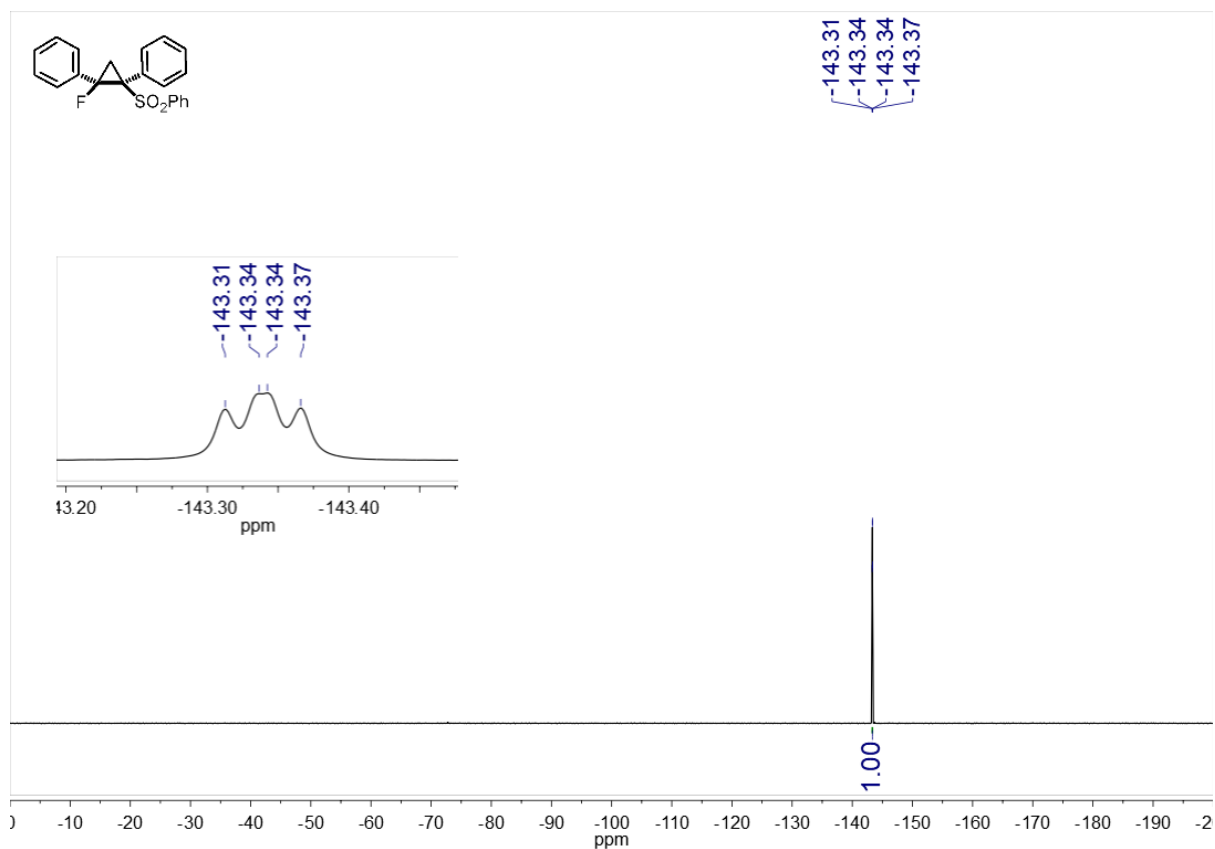

$^{19}\text{F}$  NMR spectrum (565 MHz,  $\text{CDCl}_3$ , 23 °C) of **8**

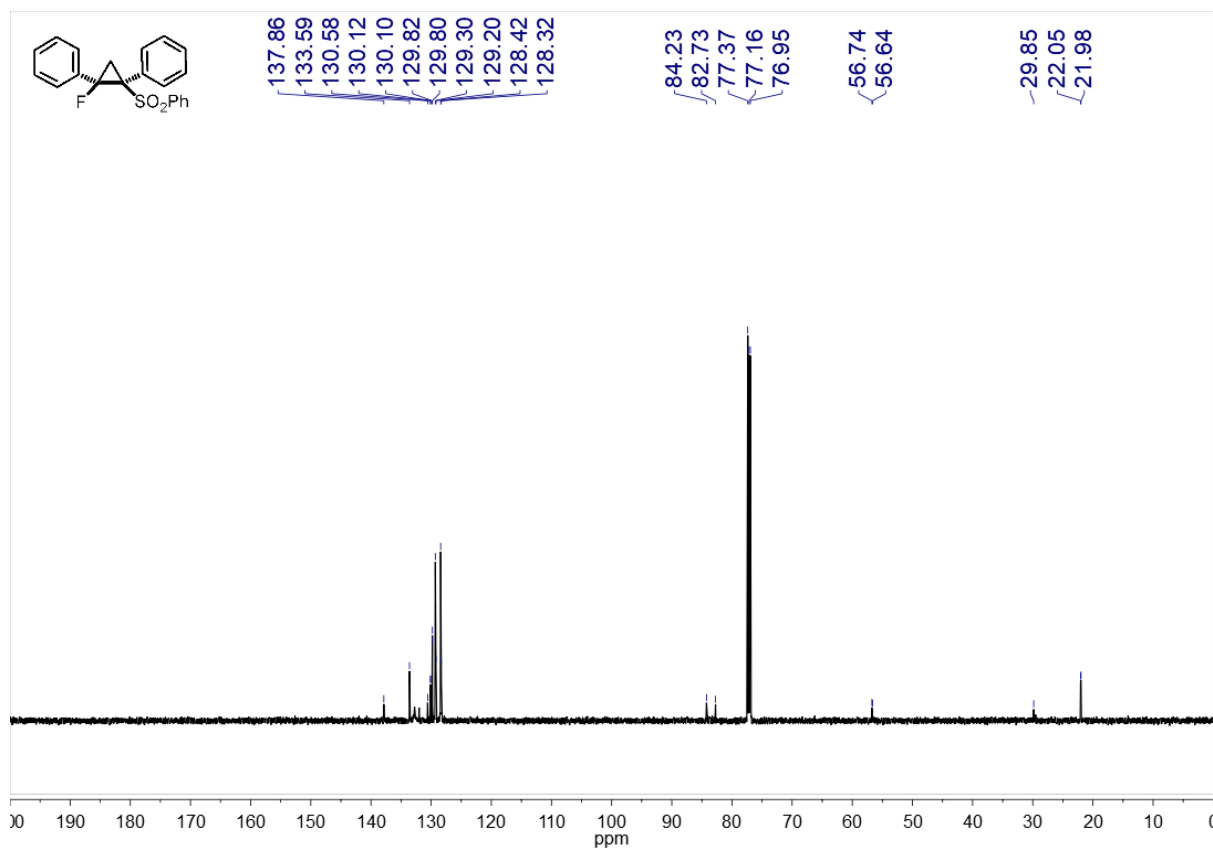

$^{13}\text{C}$  NMR spectrum (151 MHz,  $\text{CDCl}_3$ , 23 °C) of **8**



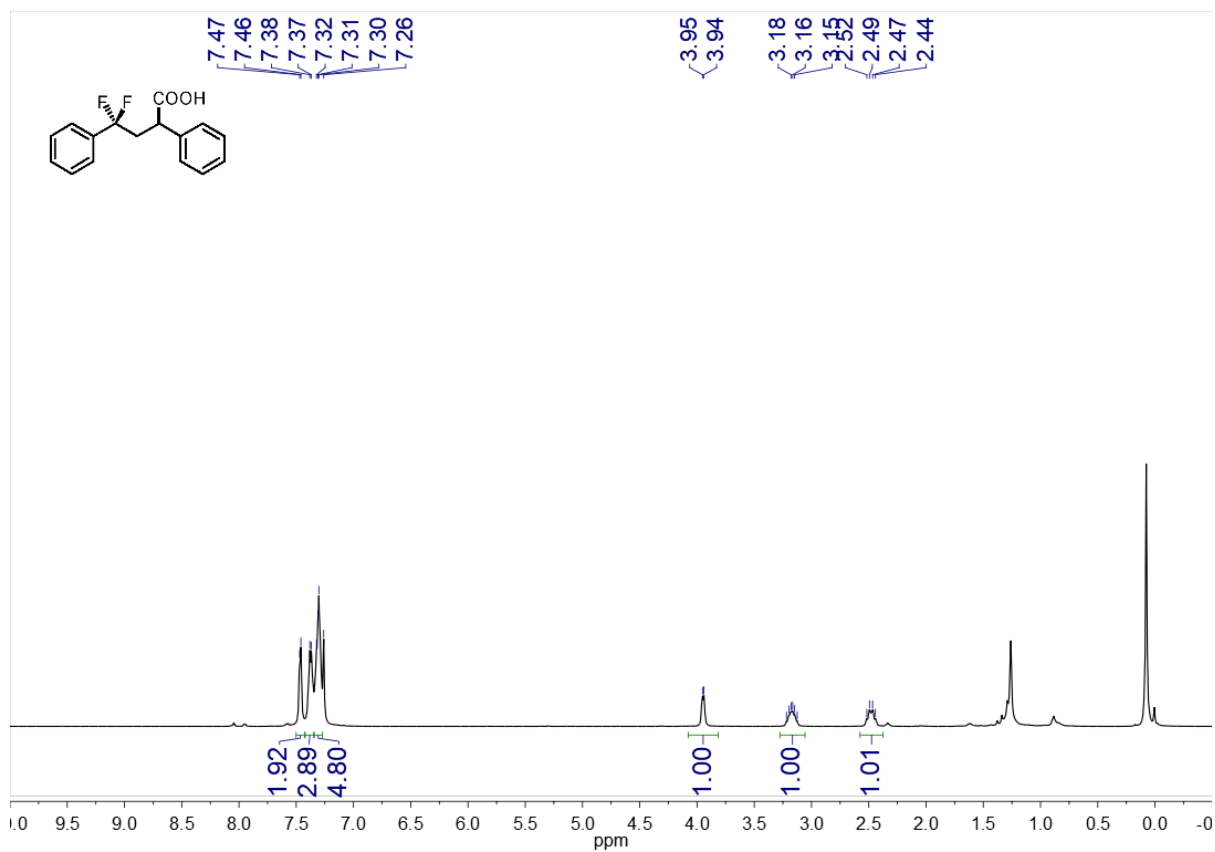

<sup>1</sup>H NMR spectrum (600 MHz, CDCl<sub>3</sub>, 23 °C) of **9**

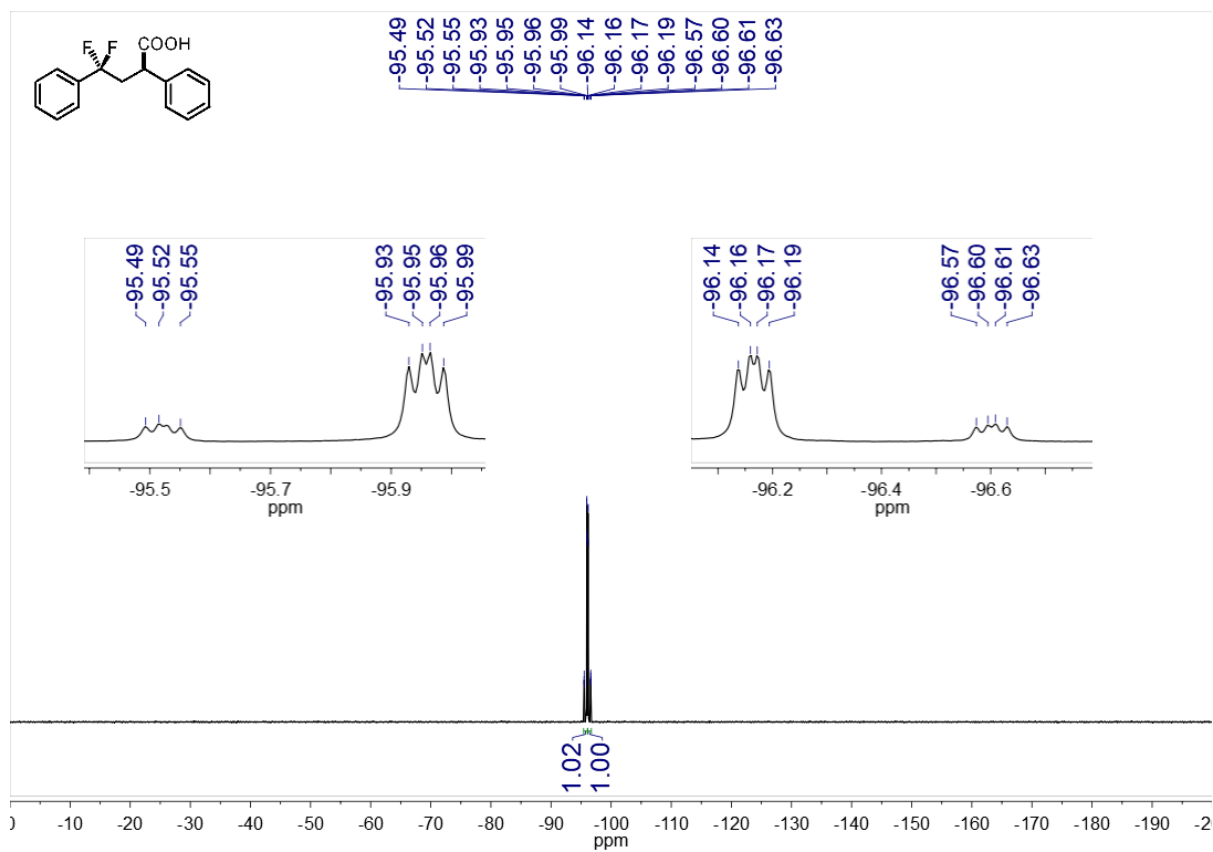

<sup>19</sup>F NMR spectrum (565 MHz, CDCl<sub>3</sub>, 23 °C) of **9**

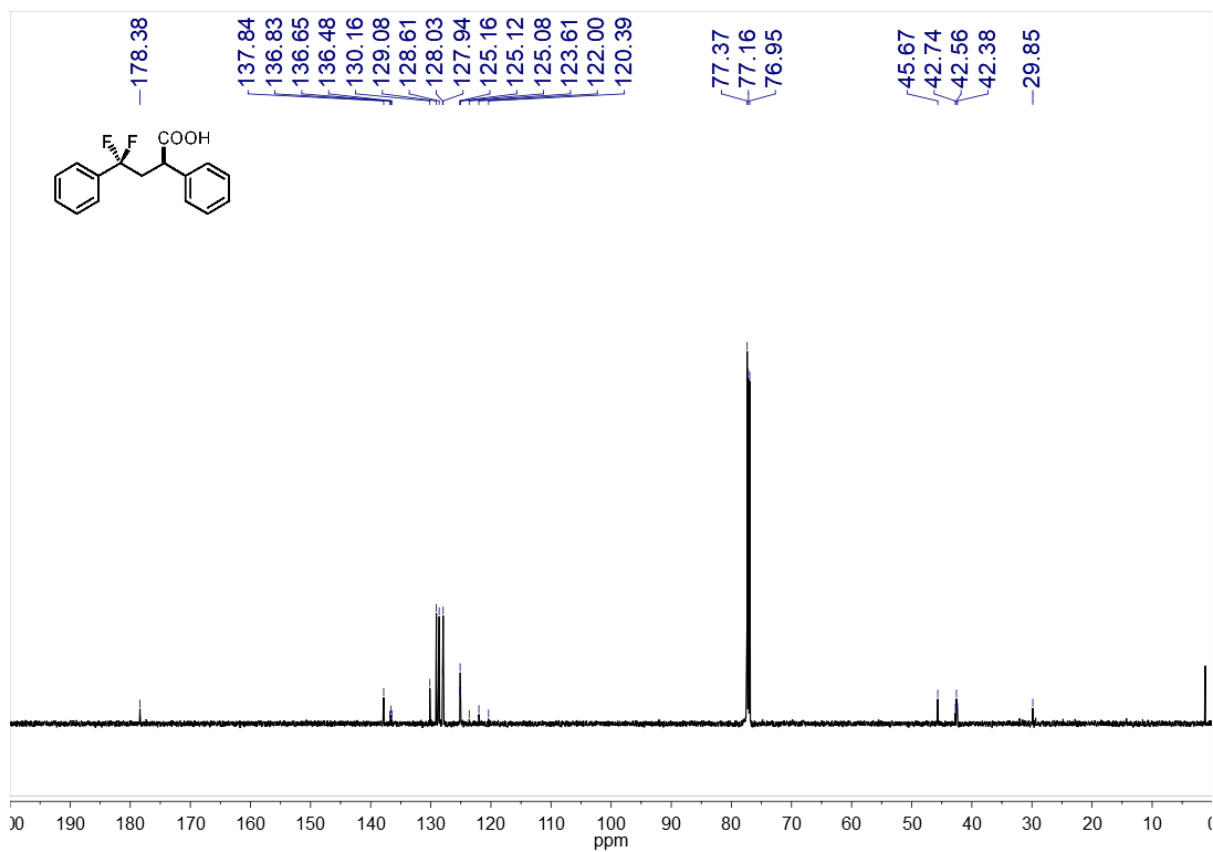

<sup>13</sup>C NMR spectrum (151 MHz, CDCl<sub>3</sub>, 23 °C) of **9**

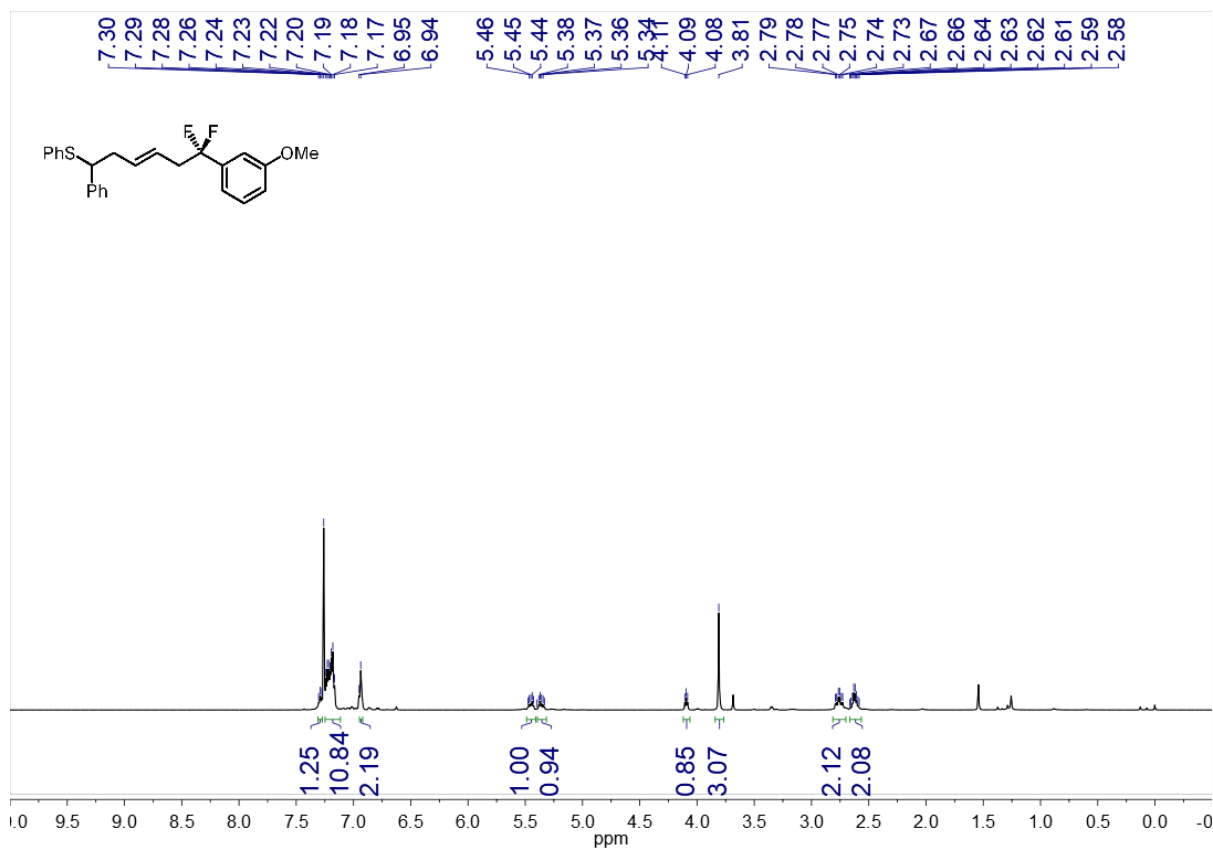

<sup>1</sup>H NMR spectrum (600 MHz, CDCl<sub>3</sub>, 23 °C) of **11**

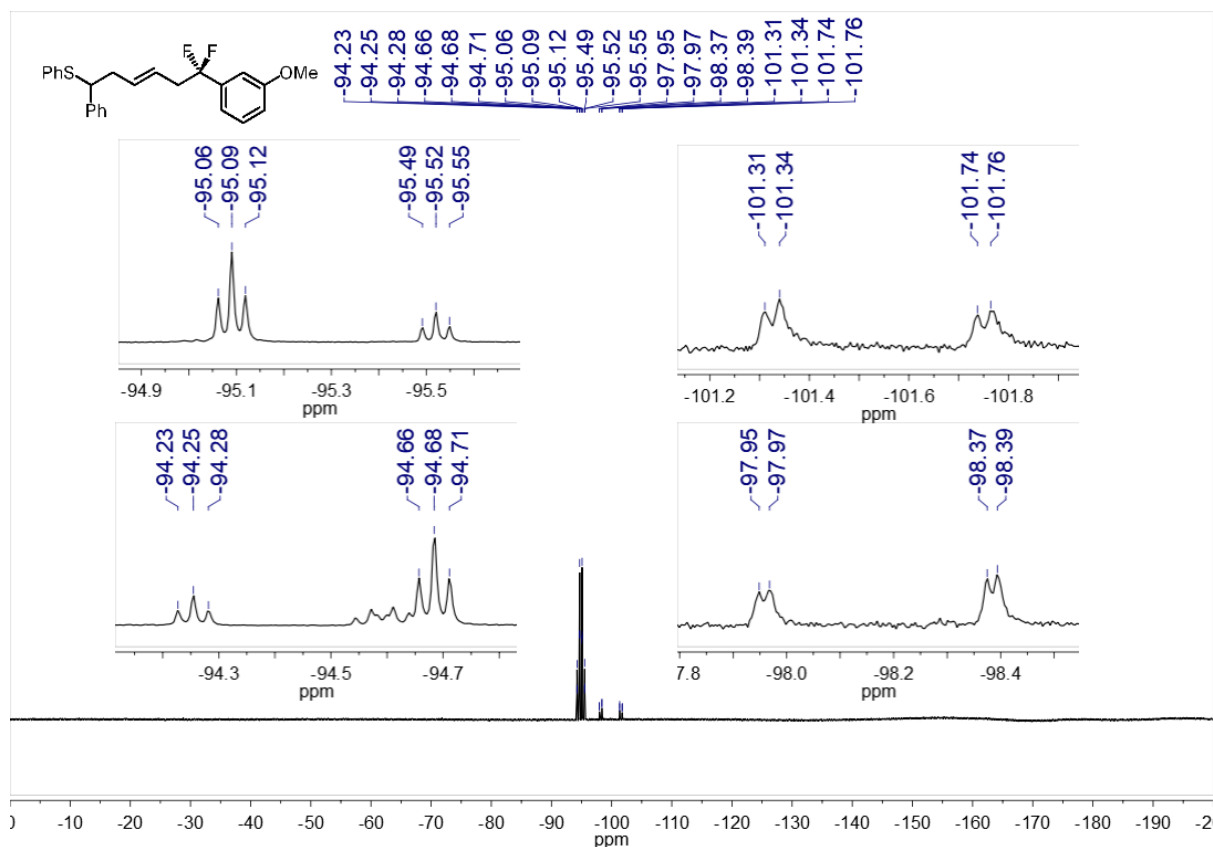

$^{19}\text{F}$  NMR spectrum (565 MHz,  $\text{CDCl}_3$ , 23  $^\circ\text{C}$ ) of **11**

## 8 X-Ray Crystallography Data of **5x**

The suitable crystals were selected on a PANalytical B.V diffractometer. The crystals were kept at 296.15 K during data collection. Using Olex2<sup>2</sup>, the structures were solved with the ShelX T<sup>3</sup> structure solution program using Intrinsic Phasing and refined with the ShelXL<sup>4</sup> refinement package using Least Squares minimisation.

Single-crystals suitable for X-ray diffraction analysis were grown from the recrystallization in chloroform and methanol (1/1, v/v) at 2-8  $^\circ\text{C}$ .

## X-Ray crystallography data of **5x** (CCDC 2266205)

<sup>2</sup> O.V. Dolomanov, L. J. Bourhis, R. J. Gildea, J. A. K. Howard & H. Puschmann, *J. Appl. Cryst.* **2009**, 42, 339-341.

<sup>3</sup> Sheldrick, G.M. (2015). *Acta Cryst.* C71, 3-8.

<sup>4</sup> Sheldrick, G.M. (2015). *Acta Cryst.* A71, 3-8.

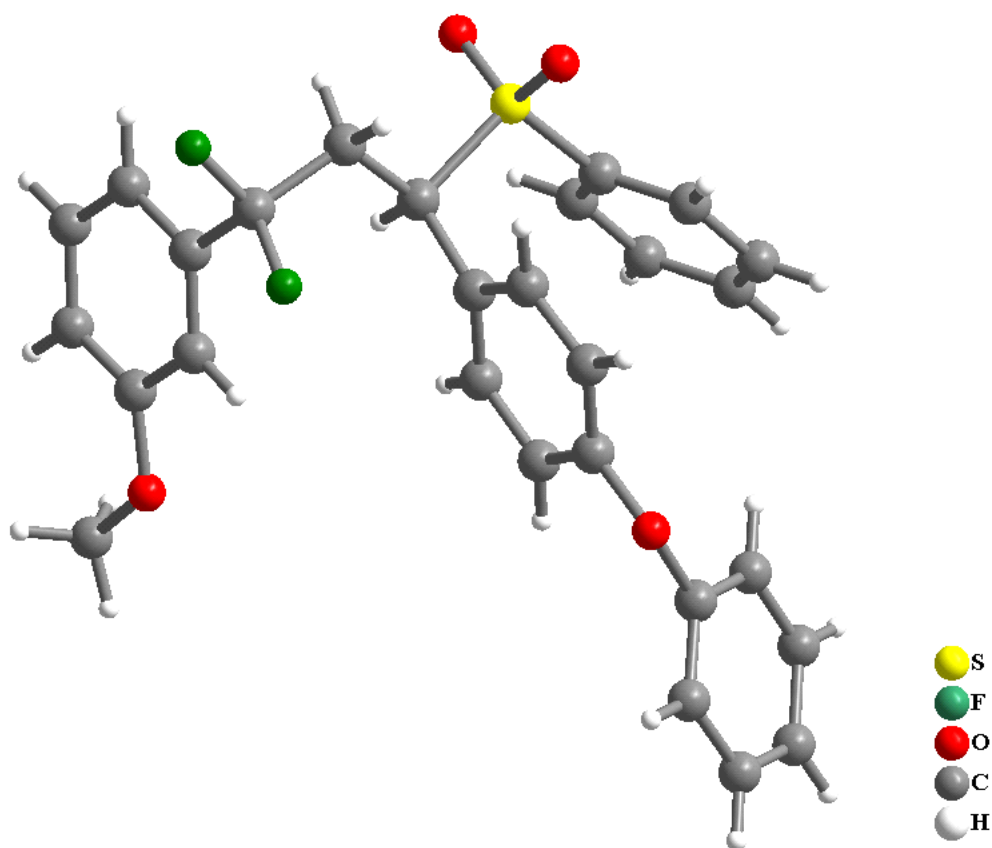

|                                     |                                                                 |                                                        |              |
|-------------------------------------|-----------------------------------------------------------------|--------------------------------------------------------|--------------|
| Formula                             | C <sub>28</sub> H <sub>24</sub> F <sub>2</sub> O <sub>4</sub> S | $\mu(\text{mm}^{-1})$                                  | 0.180        |
| Formula weight                      | 494.53                                                          | F (000)                                                | 1032         |
| Temperature (K)                     | 296.15                                                          | Reflns collected                                       | 23539        |
| Crystal system                      | Monoclinic                                                      | Independent reflns                                     | 6091         |
| Space group                         | P2(1)/c                                                         | R <sub>int</sub>                                       | 0.0281       |
| a (Å)                               | 15.0930(6)                                                      | Thetarang (°)                                          | 2.796-56.628 |
| b (Å)                               | 8.0955(3)                                                       | Params/restraints/data                                 | 128/0/1698   |
| c (Å)                               | 20.7666(7)                                                      | R <sub>1</sub> [I > 2σ(I)]                             | 0.0443       |
| D <sub>c</sub> (g/cm <sup>3</sup> ) | 1.975                                                           | wR <sub>2</sub> (all data)                             | 0.1329       |
| Volume/ (Å <sup>3</sup> )           | 2448.56(16)                                                     | GOF on F <sup>2</sup>                                  | 1.042        |
| Z                                   | 4                                                               | $\rho_{\text{max}}/\rho_{\text{min}}, \text{e Å}^{-3}$ | 0.31/-0.27   |

$$^a R1 = \|F_o\| - \|F_c\| / \|F_o\|; \quad ^b wR2 = [w(F_o^2 - F_c^2)^2] / [w(F_o^2)^2]^{1/2}$$

## 9 References

- [1] M. D. Greenhalgh, S. P. Thomas, *J. Am. Chem. Soc.* **2012**, *134*, 11900-11903.
- [2] T. W. Butcher, E. J. McClain, T. G. Hamilton, T. M. Perrone, K. M. Kroner, G. C. Donohoe, N. G. Akhmedov, J. L. Petersen, B. V. Popp, *Org. Lett.* **2016**, *18*, 6428-6431.
- [3] C. Wan, R. J. Song, J. H. Li, *Org. Lett.* **2019**, *21*, 2800-2803.
- [4] J. Shen, J. Li, M. Chen, Y. Chen, *Org. Chem. Front.* **2023**, *10*, 1166-1172.
- [5] J. Manigrasso, I. Chillon, V. Genna, P. Vidossich, S. Somarowthu, A. M. Pyle, M. De Vivo, M. Marcia, *Nat. Commun.* **2022**, *13*, 2837-2851.
- [6] J. J. Molloy, C. P. Seath, M. J. West, C. McLaughlin, N. J. Fazakerley, A. R. Kennedy, D. J. Nelson, A. J. B. Watson, *J. Am. Chem. Soc.* **2018**, *140*, 126-130.
- [7] N. L. Frye, A. Bhunia, A. Studer, *Org. Lett.* **2020**, *22*, 4456-4460.
- [8] B. N. Bhawal, J. C. Reisenbauer, C. Ehinger, B. Morandi, *J. Am. Chem. Soc.* **2020**, *142*, 10914-10920.
- [9] C. Y. Huang, A. G. Doyle, *J. Am. Chem. Soc.* **2012**, *134*, 9541-9544.
- [10] J. Liu, S. Wu, J. Yu, C. Lu, Z. Wu, X. Wu, X. S. Xue, C. Zhu, *Angew. Chem. Int. Ed.* **2020**, *59*, 8195-8202.
- [11] G. S. Lee, D. Kim, S. H. Hong, *Nat. Commun.* **2021**, *12*, 991-1002.
- [12] P. Picconi, P. Prabakaran, J. L. Auer, S. Sandiford, F. Cascio, M. Chowdhury, C. Hind, M. E. Wand, J. M. Sutton, K. M. Rahman, *Bioorg. Med. Chem.* **2017**, *25*, 3971-3979.
- [13] H. Cao, H. Jiang, H. Feng, J. M. C. Kwan, X. Liu, J. Wu, *J. Am. Chem. Soc.* **2018**, *140*, 16360-16367.
- [14] M. S. Martin Bosch, *J. Org. Chem.* **2003**, *68*, 5225-5227.
- [15] Q. Wang, Y. Qu, H. Tian, Y. Liu, H. Song, Q. Wang, *Chem. Eur. J.* **2019**, *25*, 8686-8690.
- [16] M. P. John Esposito, Y. B. Kang, *U.S. Patent WO2021151062*, July 29, **2021**.
- [17] R. Y. Yang, X. Gao, K. Gong, J. Wang, X. Zeng, M. Wang, J. Han, B. Xu, *Org. Lett.* **2022**, *24*, 164-168.
- [18] R. A. Escobar, J. W. Johannes, *Chem. Eur. J.* **2020**, *26*, 5168-5173.
- [19] S. Ni, M. Hribersek, S. K. Baddigam, F. J. L. Ingner, A. Orthaber, P. J. Gates, L. T.

- Pilarski, *Angew. Chem. Int. Ed.* **2021**, *60*, 6660-6666.
- [20] Y. Miki, N. Tomita, K. Ban, H. Sajiki, Y. Sawama, *Adv. Synth. Catal.* **2021**, *363*, 3481-3484.
- [21] L. Zhou, W. Lu, *Org. Lett.* **2014**, *16*, 508-511.
- [22] J. Z. Wu, V. Jean Michel; H. Chen, J. L. Song, *U.S. Patent US20090326059*, December 31, **2019**.
- [23] S. M. Park, J. U. Lee; D. H. Lee, *K.R. Patent KR2022066701*, November 16, **2020**.
